# Supplementary material for: Conserved and Opposite Transcriptome Patterns during Germination in Hordeum vulgare and Arabidopsis thaliana
Source: Int J Mol Sci. 2020 Oct 7;21(19):7404. doi: 10.3390/ijms21197404 (PMC7584043; doi:10.3390/ijms21197404)
Supplement: Supplementary file 1 [file ijms-21-07404-s001.zip]

Archive with 7 entries (6 files):
- Supplementary Files/
- Supplementary Files/Supplemental Figure 2 V5.8.pdf
- __MACOSX/Supplementary Files/._Supplemental Figure 2 V5.8.pdf
- Supplementary Files/Supplemental Figure 1 V5.8.ai
- __MACOSX/Supplementary Files/._Supplemental Figure 1 V5.8.ai
- Supplementary Files/Supplemental Tables Ver 5.7.xlsx
- __MACOSX/Supplementary Files/._Supplemental Tables Ver 5.7.xlsx
