# Supplementary material for: Conserved and Opposite Transcriptome Patterns during Germination in Hordeum vulgare and Arabidopsis thaliana
Source: Int J Mol Sci. 2020 Oct 7;21(19):7404. doi: 10.3390/ijms21197404 (PMC7584043; doi:10.3390/ijms21197404)
Supplement: Supplementary file 1 [file ijms-21-07404-s001.zip › Supplementary Files/Supplemental Tables Ver 5.7.xlsx]

## Sheet: ST1A
Supplemental Table 1A. Expression of protein-coding barley genes over the germination time course. Given are the means of transcripts per million (TPM) values of the four biological replicates.
HORVU	type	annotation	TPM0h	TPM3h	TPM6h	TPM12h	TPM24h	TPM36h	TPM48h
HORVU0Hr1G000010	LC_u	undescribed protein	0	0	0	0	0	0	0
HORVU0Hr1G000020	HC_G	Leucine-rich repeat receptor-like protein kinase family protein	0.00919117	0	0.00525137	0.0059677	0.0134097	0.0242959	0.0413743
HORVU0Hr1G000030	HC_G	Charged multivesicular body protein 5	14.9451	24.0856	64.1544	52.5694	36.1827	44.3358	55.6329
HORVU0Hr1G000040	LC_u	undescribed protein	0	0	0	0	0	0	0
HORVU0Hr1G000050	HC_G	receptor-like protein kinase 4	0	0	0	0	0	0	0
HORVU0Hr1G000060	LC_u	undescribed protein	0	0	0	0	0	0	0
HORVU0Hr1G000070	LC_u	undescribed protein	0.135134	0.0654418	0.160752	0.0655467	0.256128	0.134965	0.118056
HORVU0Hr1G000080	HC_G	Ubiquitin-conjugating enzyme family protein	220.96	232.189	267.588	192.409	146.061	137.019	116.823
HORVU0Hr1G000090	x	x	0	1.10812	1.264	5.22251	0.558948	4.14305	0.490296
HORVU0Hr1G000100	HC_G	Anther ethylene-upregulated protein ER1; putative; expressed	52.0056	37.792	57.3576	54.4996	23.2168	29.6488	41.7944
HORVU0Hr1G000110	LC_u	undescribed protein	0	0	0	0	0	0	0
HORVU0Hr1G000120	HC_TE?	Zinc finger MYM-type protein 5	0	0	0	0	0	0	0
HORVU0Hr1G000130	HC_G	Disease resistance protein RPM1	0.0694635	0.102882	1.25662	5.113	6.65205	6.60603	7.23965
HORVU0Hr1G000140	LC_u	undescribed protein	0	0.103458	0	0	0	0	0.215445
HORVU0Hr1G000150	LC_TE	Transposon protein; putative; CACTA; En/Spm sub-class	0.198497	0.47127	1.7369	2.09006	1.38802	1.23136	1.37862
HORVU0Hr1G000160	HC_G	ACT domain-containing protein	0.174218	0	0	0	0.000993155	0.796674	0
HORVU0Hr1G000170	LC_u	undescribed protein	0	0	0	0	0.0347785	0	0
HORVU0Hr1G000180	LC_u	undescribed protein	0.816364	0.732639	1.95584	1.87647	2.32226	2.12375	2.05993
HORVU0Hr1G000190	LC_u	undescribed protein	0.0141925	0.029803	0	0.0646237	0.00983073	0	0.0726792
HORVU0Hr1G000200	HC_G	actin depolymerizing factor 4	182.317	181.581	344.974	450.687	332.788	355.589	278.925
HORVU0Hr1G000210	x	x	169.953	99.6765	31.3432	26.0026	31.6666	30.2802	34.6065
HORVU0Hr1G000220	LC_u	undescribed protein	0	0	0	0	0	0	0
HORVU0Hr1G000230	HC_U	Protein of unknown function (DUF594)	0	0	0	0	0	0	0
HORVU0Hr1G000240	LC_u	undescribed protein	0	0	0	0	0	0	0
HORVU0Hr1G000250	HC_G	transducin family protein / WD-40 repeat family protein	5.00209	61.0627	78.7671	26.3432	12.9208	11.0617	11.6791
HORVU0Hr1G000260	LC_u	undescribed protein	0	0	0	0	0	0	0
HORVU0Hr1G000270	HC_U	unknown function	14.4992	21.0626	37.4612	36.3261	19.2126	14.6992	13.0329
HORVU0Hr1G000280	HC_G	pfkB-like carbohydrate kinase family protein	11.6471	14.5483	8.06111	4.05234	5.82003	6.68203	8.32386
HORVU0Hr1G000290	HC_G	Flavin-containing monooxygenase family protein	0	0	0	0	0	0	0
HORVU0Hr1G000300	HC_G	unknown function	0.0110697	0.0320125	0.127835	0.0262495	0.0402193	0.0210546	0.0125646
HORVU0Hr1G000310	LC_u	undescribed protein	0	0	0	0	0	0	0
HORVU0Hr1G000320	HC_G	Core-2/I-branching beta-1;6-N-acetylglucosaminyltransferase family protein	31.2482	14.605	41.2373	82.0511	66.6844	91.5968	97.2572
HORVU0Hr1G000330	LC_u	undescribed protein	0	0	0	0	0	0	0
HORVU0Hr1G000340	HC_G	cystathionine beta-lyase	5.61803	4.3132	3.94519	3.24588	2.59639	0.901316	0.885759
HORVU0Hr1G000350	HC_G	DNA-directed RNA polymerase	3.73938	2.06499	5.24697	10.2781	7.59498	8.24564	7.5881
HORVU0Hr1G000360	HC_G	DNA-directed RNA polymerase	0.666438	0.0231031	1.05262	1.50287	1.355	2.32603	1.60869
HORVU0Hr1G000370	HC_G	DNA-directed RNA polymerase IV subunit 1	2.27037	1.65223	5.37589	11.2119	8.42217	6.03149	6.79692
HORVU0Hr1G000380	LC_u	undescribed protein	0	0	0	0	0	0	0
HORVU0Hr1G000390	HC_G	BEST Arabidopsis thaliana protein match is: glycine-rich protein .	5.49104	3.11216	6.10825	7.99655	8.79859	8.42353	8.59585
HORVU0Hr1G000400	LC_U	unknown function	0	0	0	0	0	0	0
HORVU0Hr1G000410	HC_G	Zinc transporter ZupT	36.0173	29.3542	62.8965	69.4069	47.4429	46.7815	49.7771
HORVU0Hr1G000420	HC_TE?	F-box domain containing protein; expressed	1.77973	1.9182	1.40611	1.41089	2.76028	1.61607	0.844511
HORVU0Hr1G000430	HC_G	kinesin-like protein 1	1.04499	0.954644	2.27964	4.15597	9.04329	8.1814	8.16524
HORVU0Hr1G000440	x	x	7.86019	4.69414	2.17145	3.81994	8.16773	4.55498	1.09242
HORVU0Hr1G000450	HC_G	receptor kinase 2	0.404369	1.58649	4.24485	1.23394	0.774974	0.135294	1.05126
HORVU0Hr1G000460	LC_M	Retrotransposon protein; putative; Ty1-copia subclass	0	0	0.0126514	0	0	0	0
HORVU0Hr1G000470	LC_u	undescribed protein	0	0	0	0	0	0	0
HORVU0Hr1G000480	x	x	0.909177	0.781643	1.02791	0.683698	0.668906	1.30751	1.582
HORVU0Hr1G000490	HC_G	Phospho-2-dehydro-3-deoxyheptonate aldolase 2; chloroplastic	0	0	0	0	0	0	0
HORVU0Hr1G000500	HC_u	undescribed protein	0	0	0	0.074749	0	0.0673285	0
HORVU0Hr1G000510	HC_G	Protein RETICULATA-RELATED 4; chloroplastic	34.5331	20.353	20.0539	45.1492	89.2575	105.689	129.769
HORVU0Hr1G000520	LC_u	undescribed protein	0.041505	0	0.0903573	0.0231238	0.0123344	0.0162673	0.0368498
HORVU0Hr1G000530	LC_u	undescribed protein	0	0	0	0	0	0	0
HORVU0Hr1G000540	LC_u	undescribed protein	0	0.0252332	0.135569	0	0.0184853	0	0
HORVU0Hr1G000550	LC_u	undescribed protein	0	0	0.142931	0	0.27023	0	0.133236
HORVU0Hr1G000560	LC_u	undescribed protein	0.0972667	1.37956	0.117143	0	0.213387	0.439365	0.35472
HORVU0Hr1G000570	LC_u	undescribed protein	0.143381	0	0.411432	0.465296	0.303254	0.136064	0.0639805
HORVU0Hr1G000580	x	x	0.489216	0.180139	0.159493	0.865287	0.365616	0.366656	0.166336
HORVU0Hr1G000590	LC_u	undescribed protein	0	0	0	0	0	0	0
HORVU0Hr1G000600	HC_G	unknown function	13.4194	23.1377	45.3236	39.7993	20.6363	17.062	19.5238
HORVU0Hr1G000610	LC_U	Protein of unknown function (DUF288)	2.38787	4.59322	19.8402	27.1947	34.6555	46.4478	51.5771
HORVU0Hr1G000620	HC_G	Chaperone protein dnaJ 3	0	0	0	0	0.171248	0.441973	0.690709
HORVU0Hr1G000630	HC_G	NAC domain containing protein 103	14.3808	37.2854	94.5017	169.031	141.491	121.75	135.001
HORVU0Hr1G000640	HC_u	undescribed protein	0	0	0	0	0	0	0
HORVU0Hr1G000650	HC_G	Hexosyltransferase	0.341473	1.10115	0.854408	2.1503	1.94423	2.16117	3.12577
HORVU0Hr1G000660	HC_G	TRICHOME BIREFRINGENCE-LIKE 7	2.31961	3.78596	8.70296	6.53904	2.29044	2.17937	2.38173
HORVU0Hr1G000670	HC_G	Hexosyltransferase	3.82797	4.62221	3.81779	4.55469	5.11846	6.72654	5.29608
HORVU0Hr1G000680	LC_u	undescribed protein	0.153243	1.79841	1.13972	1.10849	2.4074	2.37378	1.23641
HORVU0Hr1G000690	LC_u	undescribed protein	0	0.24999	0	0	0	0	0
HORVU0Hr1G000700	LC_u	undescribed protein	0	0	0	0	0	0	0
HORVU0Hr1G000710	HC_G	Transcription factor	5.78175	8.77606	14.2961	29.0299	23.2419	13.5155	15.3744
HORVU0Hr1G000720	HC_G	ENTH/ANTH/VHS superfamily protein	0	0	0	0	0	0	0
HORVU0Hr1G000730	HC_G	undescribed protein	0	0.511616	2.98636	0.624478	1.3437	0.609093	0.782975
HORVU0Hr1G000740	HC_U	unknown function	0	0.106132	0	0.138535	0	0	0
HORVU0Hr1G000750	LC_u	undescribed protein	0	0	0	0	0	0	0
HORVU0Hr1G000760	HC_G	undescribed protein	0	0.733385	0	0	4.34462	0	0
HORVU0Hr1G000770	LC_u	undescribed protein	0	0	0	0	0	0	0
HORVU0Hr1G000780	HC_G	unknown function	6.94768	3.94984	41.7385	180.254	498.599	378.269	205.715
HORVU0Hr1G000790	LC_U	Chromosome 3B; genomic scaffold; cultivar Chinese Spring	0	0	0	0	0	0	0
HORVU0Hr1G000800	LC_u	undescribed protein	0	0	0	0	0	0	0
HORVU0Hr1G000810	HC_G	Phospholipase A1-II 7	1.92044	1.46128	9.57582	89.1807	302.521	399.816	352.889
HORVU0Hr1G000820	LC_u	undescribed protein	0	0	0	0	0	0	0
HORVU0Hr1G000830	LC_TE	unknown function	0.184664	6.85633	1.60501	0.434126	0	0	0.142405
HORVU0Hr1G000840	HC_G	undescribed protein	0.260323	0.402067	5.01667	24.8512	181.457	134.487	54.7655
HORVU0Hr1G000850	HC_G	undescribed protein	0	1.10007	0	0	0	0	0
HORVU0Hr1G000860	LC_TE?	Aspartic proteinase nepenthesin-2	0	0	0	0	0	0	0
HORVU0Hr1G000870	LC_u	undescribed protein	0	0	0	0	0	0	0
HORVU0Hr1G000880	LC_u	undescribed protein	0	0	0	0	0	0	0
HORVU0Hr1G000890	HC_u	undescribed protein	1.1e-06	5.01e-06	5.09e-06	0	4.18e-06	7.66e-06	1.49e-05
HORVU0Hr1G000900	HC_u	undescribed protein	0	0	0	0	0	0	0
HORVU0Hr1G000910	HC_G	Glucan 1;3-beta-glucosidase	0.195864	0	0.0649459	0.0361145	2.93308	12.3985	7.91921
HORVU0Hr1G000920	LC_u	undescribed protein	0	1.28425	0.0934172	0.103684	0	0	0
HORVU0Hr1G000930	HC_G	Chromosome 3B; genomic scaffold; cultivar Chinese Spring	1.22932	2.5698	2.80953	0.583064	2.76405	2.45116	1.86963
HORVU0Hr1G000940	HC_TE?	Zinc finger protein 830	38.0636	29.048	21.6438	23.3604	10.7937	10.8158	10.4308
HORVU0Hr1G000950	HC_G	Basic-leucine zipper (bZIP) transcription factor family protein	0.150561	0.325092	0.147432	0.0309221	1.64191	0.887461	0.599959
HORVU0Hr1G000960	HC_G	Nuclear transport factor 2 (NTF2) family protein	0	0	0	0	0	0.0309122	0.0628507
HORVU0Hr1G000970	LC_u	undescribed protein	0	0	0	0	0	0	0
HORVU0Hr1G000980	LC_u	undescribed protein	0.153591	0.266461	0.353402	1.82895	1.90486	3.32561	2.55062
HORVU0Hr1G000990	HC_u	undescribed protein	5.38368	13.5938	28.961	16.4957	8.12353	7.68597	8.44551
HORVU0Hr1G001000	LC_u	undescribed protein	0	0	0	0	0	0	0
HORVU0Hr1G001010	LC_u	undescribed protein	0	0.419422	0.239897	0.0453255	0	0	0
HORVU0Hr1G001020	LC_TE	Transposon protein; putative; CACTA; En/Spm sub-class	0	0	0	0	0	0	0
HORVU0Hr1G001030	LC_M	Transposon protein; putative; CACTA; En/Spm sub-class	0	0	0	0	0	0	0
HORVU0Hr1G001040	HC_G	Calcium-transporting ATPase	0.0552495	2.03793	1.09304	0.502737	0.0908262	0.15017	0.062711
HORVU0Hr1G001050	HC_G	RNA-binding KH domain-containing protein	39.7421	35.8595	39.286	38.6133	18.577	16.6839	16.2046
HORVU0Hr1G001060	LC_u	undescribed protein	0	0	0	0	0	0	0
HORVU0Hr1G001070	HC_G	protein kinase family protein	4.49e-07	0	0	2.83e-08	0	0	0
HORVU0Hr1G001080	LC_TE	undescribed protein	0.101164	0.285546	0.215867	0.111029	0.197098	0.131748	0.158209
HORVU0Hr1G001090	LC_TE	Retrotransposon protein; putative; unclassified; expressed	0	0.145178	0.114607	0.167994	0.0956405	0.127764	0.106826
HORVU0Hr1G001100	LC_u	undescribed protein	0	0	0	0	0	0	0
HORVU0Hr1G001110	HC_G	B3 domain-containing protein	0	0	0	0	0	0	0
HORVU0Hr1G001120	HC_G	Transcription elongation factor Spt6	38.0237	47.561	118.893	161.77	70.763	57.8297	60.4271
HORVU0Hr1G001130	LC_U	Chromosome 3B; genomic scaffold; cultivar Chinese Spring	0	0.119872	0	0	0	0	0
HORVU0Hr1G001140	HC_G	RING/U-box superfamily protein	0.153348	0.850292	0.0906783	0	0	0.077193	0
HORVU0Hr1G001150	HC_G	Flavin-containing monooxygenase family protein	0	0	0	0	0	0	0
HORVU0Hr1G001160	HC_u	undescribed protein	2.17799	3.43275	1.49831	0.159381	1.0337	1.17791	0.884197
HORVU0Hr1G001170	HC_U	unknown function	0	0.033404	0	0	0.0659548	0	0.0762255
HORVU0Hr1G001180	HC_G	Proteasome subunit alpha type-3	0.077926	0	0	0	0.0307772	0.0791437	0
HORVU0Hr1G001190	HC_G	Histone-lysine N-methyltransferase 2A	1.09019	0.722237	0.675167	1.3473	1.57675	1.3941	1.1665
HORVU0Hr1G001200	HC_G	Activating signal cointegrator 1	0	0	0	0	0	0	0
HORVU0Hr1G001210	LC_u	undescribed protein	0.239924	0.854184	0.286602	0.315365	0.328495	0.365199	0.46436
HORVU0Hr1G001220	LC_u	undescribed protein	0.465303	0.584464	0.131671	0	0	0	0
HORVU0Hr1G001230	HC_G	myb domain protein 33	0	0	0.275	0	8.21e-09	0.427	0
HORVU0Hr1G001240	HC_U	unknown function	0.825592	3.02045	3.66341	5.10281	8.07783	8.60907	10.7929
HORVU0Hr1G001250	LC_u	undescribed protein	0	0	0	0	0	0	0
HORVU0Hr1G001260	x	x	14.2138	8.16183	0.928625	3.16697	4.60154	0.467986	7.52925
HORVU0Hr1G001270	HC_G	calmodulin 7	261.727	351.796	395.592	549.567	832.753	951.169	1106
HORVU0Hr1G001280	HC_G	Calmodulin	0.0465462	0.162561	0.052881	0.188363	0.813254	0.671075	1.45261
HORVU0Hr1G001290	LC_u	undescribed protein	0	0	0	0	0	0	0
HORVU0Hr1G001300	HC_G	RNA-binding KH domain-containing protein	39.7421	35.8595	39.286	38.6133	18.577	16.6839	16.2046
HORVU0Hr1G001310	LC_u	undescribed protein	0	0	0	0	0	0	0
HORVU0Hr1G001320	LC_u	undescribed protein	0	0	0	0	0	0	0
HORVU0Hr1G001330	LC_u	undescribed protein	1.24726	0.9047	1.38262	2.69289	0.887466	1.05221	1.56443
HORVU0Hr1G001340	HC_G	Coiled-coil domain-containing protein 47	82.6939	86.8763	126.882	121.379	113.798	116.754	113.696
HORVU0Hr1G001350	HC_G	Tubby-like F-box protein 9	46.1276	40.381	36.9843	43.0673	29.1175	33.7871	42.5555
HORVU0Hr1G001360	LC_u	undescribed protein	0.441729	2.33376	4.03519	2.83973	1.53583	1.56451	1.34376
HORVU0Hr1G001370	HC_G	Tubby-like F-box protein 9	1.11916	4.57224	4.92035	6.79298	3.42618	2.3481	2.11684
HORVU0Hr1G001380	LC_U	Protein of unknown function (DUF3527)	0.015477	0.0427031	0.306432	0.072022	0.112482	0.0513461	0.171149
HORVU0Hr1G001390	HC_G	S-adenosyl-L-methionine-dependent methyltransferases superfamily protein	4.58282	5.49515	15.5719	31.3946	35.8291	27.5073	25.3579
HORVU0Hr1G001400	HC_G	Colon cancer-associated protein Mic1-like containing protein; expressed	23.2873	20.0544	28.8797	38.3641	38.8461	36.8853	39.6477
HORVU0Hr1G001410	LC_u	undescribed protein	0	0	0	0	0	0	0
HORVU0Hr1G001420	HC_G	Histone H2B.2	0	0	0.082263	0	0.240965	0.270035	0.127645
HORVU0Hr1G001430	HC_G	WRKY DNA-binding protein 51	1.22888	1.95603	2.71434	2.11112	2.34489	1.47012	0.732028
HORVU0Hr1G001440	HC_G	hexokinase 1	25.3217	24.9427	52.9285	57.7004	28.7978	26.5753	25.5628
HORVU0Hr1G001450	HC_G	Cleavage and polyadenylation specificity factor subunit 5	29.5789	31.2811	45.2507	59.5061	41.2679	31.0495	28.1239
HORVU0Hr1G001460	HC_U	Protein of unknown function (DUF616)	8.67383	14.7616	41.5127	38.5606	23.3989	27.0645	35.4051
HORVU0Hr1G001470	HC_G	cDNA; clone: J065196H20; full insert sequence	0.758108	0.65764	1.43242	0.737889	6.93909	9.46717	9.06261
HORVU0Hr1G001480	HC_G	Non-specific lipid-transfer protein 2	0	0	0	0	0	0	0
HORVU0Hr1G001490	HC_G	Photosystem I reaction center subunit VI; chloroplastic	0.197764	0.69552	0.445586	0	1.94484	20.5719	45.1621
HORVU0Hr1G001500	HC_u	undescribed protein	1.17073	1.13292	3.11765	3.55534	3.47898	3.35819	3.31666
HORVU0Hr1G001510	HC_G	Peroxisomal membrane protein PEX14	71.202	63.2206	52.6216	39.0472	39.6656	40.3254	49.2754
HORVU0Hr1G001520	HC_U	unknown function	0	0	0	0	0	0	0
HORVU0Hr1G001530	HC_TE?	Zinc finger CCCH domain-containing protein 27	5.56841	8.20184	22.7036	22.2898	14.0438	12.6529	12.9254
HORVU0Hr1G001540	LC_u	undescribed protein	0	0	0	0	0	0	0
HORVU0Hr1G001550	LC_u	undescribed protein	0	0	0	0	0	0	0
HORVU0Hr1G001560	LC_u	undescribed protein	0	0	0	0	0	0	0
HORVU0Hr1G001570	HC_G	Transcription elongation factor 1 homolog	192.381	188.925	183.732	195.704	146.436	132.526	132.696
HORVU0Hr1G001580	HC_G	unknown function	0.986588	1.81487	2.5154	1.61564	1.13429	1.35074	1.6102
HORVU0Hr1G001590	LC_U	BnaA03g30440D protein	61.9556	66.6783	10.7175	2.42209	9.22588	3.26308	1.32708
HORVU0Hr1G001600	HC_u	undescribed protein	0.031518	0.0416487	0.0341977	0.0818455	0.191054	0.409674	0.518551
HORVU0Hr1G001610	HC_G	Two-component response regulator ARR22	0	0	0	0	0	0	0
HORVU0Hr1G001620	x	x	0	10.6408	11.9758	0	0.774092	0.39972	0.671573
HORVU0Hr1G001630	HC_G	Pleckstrin homology (PH) domain-containing protein	0.458879	0.225277	0.206745	0.53857	1.60602	1.65815	2.60257
HORVU0Hr1G001640	HC_G	Protein kinase superfamily protein	0	0.142895	0	0	0	0.190834	0
HORVU0Hr1G001650	LC_u	undescribed protein	0	0	0	0	0	0	0
HORVU0Hr1G001660	LC_TE	Retroelement pol polyprotein-like	0	0	0	0	0	0	0
HORVU0Hr1G001670	LC_TE	Retrotransposon protein; putative; unclassified	0	0	0	0	0	0	0
HORVU0Hr1G001680	HC_G	Cyclin B1;4	0.0523161	0.049069	0	0	0	0	0
HORVU0Hr1G001690	HC_G	Cyclin B1;4	0.18708	0.685877	2.82579	0.953299	1.57417	2.08746	1.30724
HORVU0Hr1G001700	LC_u	undescribed protein	0	0	0	0	0	0	0
HORVU0Hr1G001710	LC_TE	unknown function	0	0	0	0	0	0	0
HORVU0Hr1G001720	LC_u	undescribed protein	0	0	0	0	0	0	0
HORVU0Hr1G001740	LC_u	undescribed protein	30.3032	15.8924	26.7242	23.203	12.4575	11.9869	12.8989
HORVU0Hr1G001750	HC_G	Ethylene receptor 2	1.44118	21.9653	31.4085	8.88438	4.40526	6.00287	7.75217
HORVU0Hr1G001760	HC_G	Pentatricopeptide repeat-containing protein	0.102415	0.0602616	0.0187472	0.0341674	0.332876	0.440495	0.575211
HORVU0Hr1G001770	HC_G	Receptor-like protein kinase 2	1.22026	0.478888	3.07725	5.18643	12.0819	7.02673	2.36446
HORVU0Hr1G001780	HC_G	Disease resistance protein	0	0	0	0.0389027	0.0575747	0.0239721	0.0688102
HORVU0Hr1G001790	LC_u	undescribed protein	0	0	0	0	0	0	0
HORVU0Hr1G001800	HC_G	Cytochrome P450 superfamily protein	0	0	0	0	0	0	0.0516514
HORVU0Hr1G001810	HC_G	OB-fold nucleic acid binding domain containing protein; expressed	0	0	0	0	0	0	0
HORVU0Hr1G001820	HC_U	unknown function	0	0	0	0	0.122712	0.486747	0.563654
HORVU0Hr1G001830	LC_u	undescribed protein	0	0	0	0	0	0	0
HORVU0Hr1G001840	HC_G	Carboxymethylenebutenolidase-like protein	0	0	0	0	0	0	0
HORVU0Hr1G001850	LC_TE	Retrotransposon protein; putative; Ty1-copia subclass	0	0	0	0	0	0	0
HORVU0Hr1G001860	LC_TE	Polyprotein	0	0	0	0	0	0	0
HORVU0Hr1G001870	HC_u	undescribed protein	0	0	0	0	0	0	0
HORVU0Hr1G001880	HC_TE?	DNA/RNA helicase protein	0.128631	0.0420033	0.219832	3.87046	10.2182	9.25538	9.84537
HORVU0Hr1G001890	LC_TE	unknown function	0	0	0	0	0	0	0
HORVU0Hr1G001900	HC_u	undescribed protein	0	0	0	0	0.0595412	0.223897	0.285145
HORVU0Hr1G001910	LC_u	undescribed protein	0	0	0	0	0	0	0
HORVU0Hr1G001920	HC_G	cDNA clone:002-142-B09; full insert sequence	0	0	0	0	0	0	0
HORVU0Hr1G001930	LC_TE	unknown function	0	0	0.139431	0.105529	0	0	0
HORVU0Hr1G001940	LC_u	undescribed protein	0	0	0	0	0	0	0
HORVU0Hr1G001950	LC_u	undescribed protein	0	0	0	0	0	0	0
HORVU0Hr1G001960	HC_TE?	unknown function	0.132418	0.304528	0.542775	0	0.136786	0.134654	0
HORVU0Hr1G001970	x	x	99.5447	68.7352	115.324	190.265	108.928	114.469	111.357
HORVU0Hr1G001980	HC_G	A protein	0.0081675	0	0.0196416	0	0.0427427	0.00843955	0
HORVU0Hr1G001990	LC_u	undescribed protein	0.121015	1.02306	2.56747	0.541991	0.514726	0.114345	0.50549
HORVU0Hr1G002000	x	x	0	0	0	0	0	0	0
HORVU0Hr1G002010	x	x	0	0	0	0	0	0	0
HORVU0Hr1G002020	HC_G	Heat stress transcription factor A-2b	7.09833	1.6032	0.248531	0.298687	0.541122	0.115962	0.13038
HORVU0Hr1G002030	HC_G	Acyl carrier protein	0	0	0	0	0	0	0
HORVU0Hr1G002040	HC_G	Acyl carrier protein	0.135584	0	0	0	0	0	0
HORVU0Hr1G002050	LC_u	undescribed protein	0	0	0	0	0	0	0
HORVU0Hr1G002060	HC_G	Acyl carrier protein	0	0	0	0	0	0	0
HORVU0Hr1G002070	LC_u	undescribed protein	0.646415	0	1.60237	0.953843	0	0.627602	0
HORVU0Hr1G002080	HC_G	ATP-dependent DNA helicase recQ	0	0.884515	3.4901	8.06706	4.33887	3.18686	4.21263
HORVU0Hr1G002090	HC_G	Hexosyltransferase	2.86773	1.81903	15.6053	37.4554	41.367	45.0134	49.2064
HORVU0Hr1G002100	LC_TE?	ATP-dependent DNA helicase Q-like 4B	1.14701	0.793485	1.95247	12.9095	7.89314	5.35658	6.36698
HORVU0Hr1G002110	HC_TE?	ATP-dependent DNA helicase RecQ	0.658436	0.708372	1.50118	9.95038	5.06776	3.86325	5.20934
HORVU0Hr1G002120	HC_G	Hexosyltransferase	3.03709	2.25069	20.5233	54.7335	54.5008	64.7431	62.5575
HORVU0Hr1G002130	LC_u	undescribed protein	17.6333	8.69843	8.31489	56.5987	38.4507	24.9016	27.753
HORVU0Hr1G002140	LC_TE	Retrotransposon protein; putative; Ty1-copia subclass	0	0	0	0	0	0	0
HORVU0Hr1G002150	LC_TE	unknown function	0	0	0	0	0	0	0
HORVU0Hr1G002160	LC_TE	Retrotransposon protein; putative; Ty1-copia subclass	0	0	0	0	0	0	0
HORVU0Hr1G002170	LC_u	undescribed protein	0	0.438528	0	0	0.0937755	0	0
HORVU0Hr1G002180	LC_TE	unknown function	0.203266	0.3249	0.379265	0.08116	0.04716	0.0664615	0.198877
HORVU0Hr1G002190	LC_TE?	Regulatory protein recX	0	0	0	0	0	0	0
HORVU0Hr1G002200	LC_u	undescribed protein	0	0	0	0	0	0	0
HORVU0Hr1G002210	LC_u	undescribed protein	0	0	0	0	0	0	0
HORVU0Hr1G002220	HC_G	ubiquitin-conjugating enzyme 11	22.6286	24.4415	78.5891	107.621	90.3289	78.4987	95.2371
HORVU0Hr1G002230	LC_TE	Retrotransposon protein; putative; Ty1-copia subclass	0	0	0	0	0	0	0
HORVU0Hr1G002240	LC_TE	Gag-pol polyprotein	0	0	0.0249865	0.0253859	0.0197969	0.0349427	0.123046
HORVU0Hr1G002250	HC_G	Thioredoxin superfamily protein	0.339797	0.247977	0.329576	0.42025	0.62499	2.29006	2.52831
HORVU0Hr1G002260	x	x	0.607145	0.665351	0.679975	0.289756	0.213289	0.988247	2.17299
HORVU0Hr1G002270	HC_U	Chromosome 3B; genomic scaffold; cultivar Chinese Spring	0.0281824	0.0663297	0.419679	0.271318	0.130445	0.539903	0.571956
HORVU0Hr1G002280	LC_u	undescribed protein	0.122481	0	0.692218	0.315365	0.298404	0.992519	2.27999
HORVU0Hr1G002290	HC_G	Deoxyuridine 5'-triphosphate nucleotidohydrolase	0.249551	0	0	0	0	0	0
HORVU0Hr1G002300	HC_G	Nuclear pore complex protein NUP214	0.0679462	0	0	0	0	0	0
HORVU0Hr1G002310	LC_TE	Transposon protein; putative; Pong sub-class	0	0	0	0	0	0	0
HORVU0Hr1G002320	HC_G	unknown function	0	0	0.0691155	0.331799	13.9499	36.5515	36.4511
HORVU0Hr1G002330	LC_u	undescribed protein	0	0	0.0402085	0.0400957	1.3394	4.16308	2.64137
HORVU0Hr1G002340	HC_G	NADH-cytochrome b5 reductase 2	1.80482	1.76617	3.95304	1.64062	10.2638	13.8593	16.4465
HORVU0Hr1G002350	x	x	16.9338	16.5799	82.8561	173.566	204.438	292.435	372.828
HORVU0Hr1G002360	HC_U	unknown function	0	0	0	0	0	0	0
HORVU0Hr1G002370	LC_u	undescribed protein	2.93104	6.60867	3.40297	3.75495	2.53164	5.96959	5.96138
HORVU0Hr1G002380	LC_TE	Retrotransposon protein; putative; unclassified; expressed	0	0	0	0	0	0	0
HORVU0Hr1G002390	HC_U	unknown function	0	0.103236	0.0886085	0.0508069	0.0585832	0.119384	0.131754
HORVU0Hr1G002400	LC_u	undescribed protein	0	0	0	0	0	0	0
HORVU0Hr1G002410	HC_G	unknown function	0	0	0.0495183	0	0.043828	0.0714146	0.0550677
HORVU0Hr1G002420	LC_TE?	Zinc finger protein CONSTANS-LIKE 13	0.896373	1.94522	2.62307	1.12845	2.94573	3.06874	0.694739
HORVU0Hr1G002430	x	x	0.00286336	0.0350208	0.00536455	0.00484151	0.00250555	0.0868099	0.00161994
HORVU0Hr1G002440	LC_u	undescribed protein	0	0	0	0	0	0	0
HORVU0Hr1G002450	HC_G	MATE efflux family protein	0	0	0	0	0	0	0
HORVU0Hr1G002460	HC_U	undescribed protein	0	0	0	0	0	0	0
HORVU0Hr1G002470	LC_u	undescribed protein	0	0	0	0	0	0	0
HORVU0Hr1G002480	HC_G	Metallo-beta-lactamase-like	0	0	0	0	0	0	0
HORVU0Hr1G002490	x	x	0	0	0	0	0	0	0
HORVU0Hr1G002500	HC_G	metallo-beta-lactamase family protein	0	0	0	0	0	0	0
HORVU0Hr1G002510	LC_u	undescribed protein	0	0	0	0	0.0588557	0	0
HORVU0Hr1G002520	HC_G	UDP-Glycosyltransferase superfamily protein	0.371809	0.785066	0.697678	0.552275	2.25392	1.94096	1.12266
HORVU0Hr1G002530	HC_G	metallo-beta-lactamase family protein	3.6806	6.90763	5.65374	3.17799	4.914	5.75104	7.39754
HORVU0Hr1G002540	LC_u	undescribed protein	0	0	0	0	0	0	0
HORVU0Hr1G002550	LC_u	undescribed protein	0	0	0	0	0	0	0
HORVU0Hr1G002560	LC_TE	unknown function	0	0.15358	0	0	0	0	0
HORVU0Hr1G002570	LC_u	undescribed protein	2.04733	1.1068	1.83063	3.37751	1.83282	1.01183	0.553832
HORVU0Hr1G002580	HC_U	unknown function	0	0	0.138592	0.138204	1.49755	0.859776	0.231085
HORVU0Hr1G002590	LC_u	undescribed protein	0	0	0	0	0	0	0
HORVU0Hr1G002600	HC_G	Cytochrome P450 superfamily protein	0	0	0	0	0.529231	1.10677	0.698078
HORVU0Hr1G002610	LC_u	undescribed protein	0	0	0.26736	1.46538	0	0	0
HORVU0Hr1G002620	HC_G	U-box domain-containing protein 33	0	0	0	0	0	0	0
HORVU0Hr1G002630	HC_G	Protein BREAST CANCER SUSCEPTIBILITY 1 homolog	0.0063665	0.0134466	0.0157816	0.00885945	0.0680751	0.0289362	0.0712803
HORVU0Hr1G002640	HC_u	undescribed protein	0.0560623	0	0	0.076673	0.083227	0.168698	0
HORVU0Hr1G002650	LC_u	undescribed protein	0	0	0	0	0	0	0
HORVU0Hr1G002660	LC_TE	unknown function	0	0	0.040755	0	0.037024	0	0.031898
HORVU0Hr1G002670	LC_U	unknown function	0	0	0	0	0	0	0
HORVU0Hr1G002680	HC_G	Transmembrane protein 115	37.3911	31.6305	58.5129	83.2236	103.519	107.129	127.46
HORVU0Hr1G002690	HC_G	PWWP domain containing protein; expressed	10.2173	14.2677	59.4878	62.3822	29.8796	23.8384	24.5142
HORVU0Hr1G002700	LC_u	undescribed protein	3.41037	5.96749	4.00847	9.06508	3.44969	0.83056	6.10339
HORVU0Hr1G002710	HC_G	Transformation/transcription domain-associated protein	1.66561	4.89353	12.8185	16.7491	10.7643	8.84197	11.1389
HORVU0Hr1G002720	HC_G	4-coumarate:CoA ligase 1	0.0179447	0.31499	1.34728	1.4476	1.76658	1.39341	0.68231
HORVU0Hr1G002730	HC_U	BnaC03g05420D protein	160.469	139.412	198.445	235.534	211.373	208.429	181.236
HORVU0Hr1G002740	LC_u	undescribed protein	0	0.089001	0	0	0	0	0
HORVU0Hr1G002750	x	x	0	0.0293834	0.0167957	0	0	0	0.0170872
HORVU0Hr1G002760	HC_G	NAM-like protein-like	0	0	0	0	0.0930625	0	0
HORVU0Hr1G002770	HC_G	Peroxidase superfamily protein	0	0	0	0	1.79464	4.88076	3.56971
HORVU0Hr1G002780	LC_u	undescribed protein	0.156266	0.0627045	0.10853	0.034839	0.0554743	0.093035	0.123387
HORVU0Hr1G002790	LC_TE	HAT family dimerisation domain containing protein; expressed	0	0	0	0	0	0	0
HORVU0Hr1G002800	HC_G	Peroxidase superfamily protein	0.0495396	0.200541	0.772056	1.45899	0	0	0
HORVU0Hr1G002810	HC_G	undescribed protein	0	0.0719245	0.080352	0.38022	0	0	0.128752
HORVU0Hr1G002820	x	x	0	0	0	0	0	0	0
HORVU0Hr1G002830	LC_u	undescribed protein	0	0	0	0	0	0.288133	0.417598
HORVU0Hr1G002840	HC_G	Peroxidase	1.57131	14.0571	41.9435	69.9922	12.3282	9.98256	20.5867
HORVU0Hr1G002850	x	x	0	0	0	0	2.46551	11.5624	10.6933
HORVU0Hr1G002860	LC_U	unknown function	0	0	0	0	0	0	0
HORVU0Hr1G002870	HC_G	RING/U-box superfamily protein	4.43656	9.86352	2.94411	1.45021	1.47749	1.73364	1.376
HORVU0Hr1G002880	HC_u	undescribed protein	0.0545195	0	0	0	0	0	0
HORVU0Hr1G002890	LC_u	undescribed protein	0.618833	0	0	0	0	0	0.28919
HORVU0Hr1G002900	LC_u	undescribed protein	0	0.129522	0	0	0	0	0
HORVU0Hr1G002910	LC_u	undescribed protein	0	0	0.0823062	0.077002	0.171318	0.082248	0.0658622
HORVU0Hr1G002920	HC_G	peptidases	1.7598	5.47181	17.4024	4.89917	10.2852	8.16071	5.61089
HORVU0Hr1G002930	HC_U	unknown function	1.90685	7.39749	5.0255	2.474	3.14147	2.77742	0.917504
HORVU0Hr1G002940	HC_G	alpha/beta-Hydrolases superfamily protein	0.0588246	0.226487	0.120153	0.08537	0.123378	0.233761	0.104565
HORVU0Hr1G002950	HC_G	alpha/beta-Hydrolases superfamily protein	0	0.0206858	0.205187	0.0778575	0.44342	0.907207	1.63241
HORVU0Hr1G002960	HC_G	unknown protein; BEST Arabidopsis thaliana protein match is: Arabidopsis protein of unknown function (DUF241) .	8.43386	11.1041	41.0522	47.0546	21.3287	15.4287	11.9699
HORVU0Hr1G002970	LC_u	undescribed protein	0.0798445	0.0794325	0.175361	0.189335	0.0828857	0.0769818	0
HORVU0Hr1G002980	LC_TE	unknown function	0	0	0	0	0	0	0
HORVU0Hr1G002990	HC_U	unknown function	0	0	0	0	0	0	0
HORVU0Hr1G003000	HC_G	RING/U-box superfamily protein	0.864941	1.61502	0.59054	0.107858	0.17347	0.456971	0.325539
HORVU0Hr1G003010	HC_G	BEST Arabidopsis thaliana protein match is: maternal effect embryo arrest 60 .	1.82883	1.71643	2.06491	1.20372	4.41761	4.56463	3.88145
HORVU0Hr1G003020	HC_G	MADS-box transcription factor 18	0	0	0	0	0	0	0
HORVU0Hr1G003030	HC_TE?	zinc-finger protein 2	0.0176066	0.369967	0.104286	0.0711226	0.147741	0.125563	0.142591
HORVU0Hr1G003040	HC_G	Nucleotide-diphospho-sugar transferase family protein	6.03024	5.39687	8.44481	13.4531	22.3332	16.7991	15.9746
HORVU0Hr1G003050	LC_u	undescribed protein	1.95711	2.66109	4.13898	7.03798	13.8801	13.2871	8.45985
HORVU0Hr1G003060	LC_u	undescribed protein	0	0	0	0	0	0	0
HORVU0Hr1G003070	LC_u	undescribed protein	0	0	0	0	0	0	0
HORVU0Hr1G003080	HC_G	Serine/threonine-protein kinase SMG1	0	0	0	0	0	0	0
HORVU0Hr1G003090	LC_TE	unknown function	0	0	0	0	0	0	0
HORVU0Hr1G003100	LC_TE	C2H2-like zinc finger protein	0.124979	0.380981	0.0988798	0.113012	0.414127	0.379203	0.282605
HORVU0Hr1G003110	HC_U	unknown function	1.9566	4.53928	4.5537	2.67459	0.978561	2.1782	2.48661
HORVU0Hr1G003120	x	x	3.99958	10.4309	17.5903	4.55385	2.49688	3.02642	3.01445
HORVU0Hr1G003130	x	x	0	0	0	0	0	0	0
HORVU0Hr1G003140	HC_G	60S ribosomal protein L11-1	0	0	0	0	0	0	0
HORVU0Hr1G003150	LC_u	undescribed protein	0	0	0	0	0	0	0
HORVU0Hr1G003160	LC_u	undescribed protein	0	0	0	0	0	0	0
HORVU0Hr1G003170	HC_G	50S ribosomal protein L14; chloroplastic	0.384242	1.56569	0.481755	1.78077	0.860208	0.192671	1.27454
HORVU0Hr1G003180	HC_G	Glycosyltransferase family 61 protein	0	0	0	0	0.0418958	0	0
HORVU0Hr1G003190	HC_U	Protein of unknown function (DUF1218)	7.52847	3.26634	3.90284	0.890339	1.22286	0.867116	0.855792
HORVU0Hr1G003200	HC_u	undescribed protein	15.5621	11.3295	14.3577	11.5297	4.85262	4.44796	4.72927
HORVU0Hr1G003210	HC_G	PLAC8 family protein	0.110882	3.39291	2.53465	0.68671	2.1819	0.554423	0.451304
HORVU0Hr1G003220	HC_U	Protein of unknown function (DUF761)	22.892	27.1265	11.779	4.56271	6.79497	9.53648	7.05812
HORVU0Hr1G003230	HC_G	Scarecrow-like protein 23	1.29718	1.23247	0.591743	0.294568	0.459521	0.553221	0.458243
HORVU0Hr1G003240	LC_u	undescribed protein	23.6297	10.2953	5.21901	2.08332	1.17257	1.45459	1.82533
HORVU0Hr1G003250	LC_u	undescribed protein	0	0	0.320487	0	0	0	0
HORVU0Hr1G003260	HC_G	CMP-sialic acid transporter 2	9.03561	4.54218	9.19577	17.9531	15.2945	15.4628	17.8175
HORVU0Hr1G003270	HC_G	Oxygen-evolving enhancer protein 3-1; chloroplastic	1.88107	2.26708	1.02897	0.287766	2.49356	14.7771	43.3963
HORVU0Hr1G003280	HC_G	Cyclin-D6-1	0.196602	0.354123	0.233697	0.494503	2.16673	1.48613	1.14727
HORVU0Hr1G003290	LC_u	undescribed protein	0	0	0	0	0	0	0
HORVU0Hr1G003300	HC_G	Myosin-J heavy chain	0	0	0	0	0	0	0
HORVU0Hr1G003310	LC_U	unknown function	0	0.098815	0.0550558	0.0600555	0.0447632	0.0550405	0.145656
HORVU0Hr1G003320	HC_G	Pentatricopeptide repeat-containing protein	0.674694	0.729384	3.30471	1.54665	3.02647	1.45432	1.43855
HORVU0Hr1G003330	HC_G	Pentatricopeptide repeat-containing protein	6.96256	5.10016	13.9094	19.5399	9.70727	9.14851	9.1936
HORVU0Hr1G003340	HC_G	WRKY DNA-binding protein 57	0.772301	0.906571	1.53279	4.49878	5.651	5.41369	3.41536
HORVU0Hr1G003350	LC_TE?	Ketohexokinase	0	0	0	0	0	0	0
HORVU0Hr1G003360	LC_u	undescribed protein	0.654238	0.314875	0.357995	2.83701	1.88978	1.14886	1.01786
HORVU0Hr1G003370	LC_TE	Retrotransposon protein; putative; Ty3-gypsy subclass	0	0	0	0	0	0	0
HORVU0Hr1G003380	HC_G	DNA repair and recombination protein RadA	13.9438	11.7018	18.679	22.0412	17.8617	15.0484	17.4982
HORVU0Hr1G003390	LC_u	undescribed protein	0	0	0	0	0	0	0
HORVU0Hr1G003400	LC_u	undescribed protein	0	2.9387	2.5915	2.73885	1.79112	1.4579	1.77012
HORVU0Hr1G003410	LC_TE	unknown function	0.0497887	0.292922	0.194231	0.188727	0.128732	0.150109	0.0372725
HORVU0Hr1G003420	LC_TE	unknown function	1.17663	0.520635	0.926375	0.977179	0.22872	0.770907	0.705397
HORVU0Hr1G003430	LC_U	unknown function	0	0	0	0	0	0	0
HORVU0Hr1G003440	HC_G	protein tyrosine phosphatase 1	1.07699	1.84862	1.70501	1.99507	1.26831	1.21504	1.46115
HORVU0Hr1G003450	LC_u	undescribed protein	0	0	0	0	0	0	0
HORVU0Hr1G003460	LC_u	undescribed protein	8.23531	4.79882	8.1288	7.03092	4.08124	4.96434	3.61088
HORVU0Hr1G003470	x	x	0	0	0	0	0	0	0
HORVU0Hr1G003480	HC_G	Organic cation/carnitine transporter 3	0	0	0	0.26661	11.4317	15.5555	9.34305
HORVU0Hr1G003490	HC_G	Sterile alpha motif (SAM) domain-containing protein	5.5987	5.30215	6.8537	9.04525	6.80825	4.51412	4.66126
HORVU0Hr1G003500	LC_u	undescribed protein	0	0	0	0	0	0	0
HORVU0Hr1G003510	LC_TE	unknown function	0	0.0224844	0	0.0140272	0	0	0
HORVU0Hr1G003520	HC_G	undescribed protein	0.133452	0.0476541	0.08161	0.264785	0.0738583	0	0
HORVU0Hr1G003530	LC_TE	Transposon protein; putative; CACTA; En/Spm sub-class	0.2184	2.64437	6.60236	4.13132	1.3846	1.11295	1.56439
HORVU0Hr1G003540	HC_G	SNARE associated Golgi protein family	12.7884	11.663	27.3706	25.083	17.9705	16.1096	18.9935
HORVU0Hr1G003550	LC_TE	unknown function	0	0	0	0	0	0	0
HORVU0Hr1G003560	LC_u	undescribed protein	0.575116	3.47723	9.13143	6.28258	2.93985	2.74852	3.44938
HORVU0Hr1G003570	LC_TE	unknown function	0.0360577	0	0.0481958	0	0.0292104	0	0.0356061
HORVU0Hr1G003580	LC_u	undescribed protein	0	0	0	0	0	0	0
HORVU0Hr1G003590	LC_u	undescribed protein	0	0	0	0	0	0	0
HORVU0Hr1G003600	LC_u	undescribed protein	0	0	0	0	0	0	0
HORVU0Hr1G003610	LC_u	undescribed protein	0	0	0	0	0	0	0
HORVU0Hr1G003620	LC_u	undescribed protein	0	0.171564	0	0	0	0	0
HORVU0Hr1G003630	LC_u	undescribed protein	0	0	0	0	0	0	0
HORVU0Hr1G003640	LC_u	undescribed protein	2.33415	3.33347	21.2704	16.681	12.6405	16.4399	18.5699
HORVU0Hr1G003650	x	x	27.0032	40.4725	78.1092	62.3783	21.7151	18.2031	17.2097
HORVU0Hr1G003660	HC_G	Senescence-associated protein; putative	2.79279	0.634731	0.144216	0	0	0	0
HORVU0Hr1G003670	LC_u	undescribed protein	0	0	0	0	0	0	0
HORVU0Hr1G003680	LC_u	undescribed protein	0	0	0	0	0	0	0
HORVU0Hr1G003690	LC_u	undescribed protein	0	0	0	0	0	0	0
HORVU0Hr1G003700	HC_TE?	unknown function	0.00749782	0	0.0156274	0.0198639	0.00693685	0.0187004	0.00882003
HORVU0Hr1G003710	LC_TE	unknown function	0.107689	0.250398	0.633742	0.0198748	0.25006	0.0354986	0.061673
HORVU0Hr1G003720	HC_U	unknown function	0	0	0	0	0	0	0
HORVU0Hr1G003730	LC_u	undescribed protein	0	0	0	0	0	0	0
HORVU0Hr1G003740	LC_TE	unknown function	0	0	0	0.525505	0	0	0
HORVU0Hr1G003750	LC_U	unknown function	0	0	0.277801	0.15905	0	0	0
HORVU0Hr1G003760	LC_u	undescribed protein	0	0	0	0	0	0	0
HORVU0Hr1G003770	HC_G	60S ribosomal protein L37-1	0	0	0	0	0	0	0
HORVU0Hr1G003780	LC_u	undescribed protein	0	0	0	0	0	0	0
HORVU0Hr1G003790	HC_G	Kinesin-like protein	0.952138	2.64495	7.59197	1.17402	1.26543	0.576127	0.829399
HORVU0Hr1G003800	LC_u	undescribed protein	0	0	0	0	0	0	0
HORVU0Hr1G003810	HC_G	U-box domain-containing protein	0	0.812239	1.87705	2.07142	1.16921	1.06799	0.943481
HORVU0Hr1G003820	LC_u	undescribed protein	0.0647687	0	0.0812055	0.27039	0	0	0.0650095
HORVU0Hr1G003830	LC_u	undescribed protein	0	0	0	0	0	0	0
HORVU0Hr1G003840	HC_G	Glutaredoxin family protein	0.239023	0.0553295	0.065973	0.131576	1.4578	0.701109	0.393116
HORVU0Hr1G003850	HC_G	Drought-induced protein 1	0.540374	3.07643	1.47897	0.235739	1.08003	0.904514	0.436657
HORVU0Hr1G003860	LC_TE	unknown function	0	0	0	0	0	0	0
HORVU0Hr1G003870	HC_u	undescribed protein	13.4818	11.5444	23.5818	16.9747	13.5728	13.7835	10.6802
HORVU0Hr1G003880	HC_U	unknown function	0.0998985	0.529376	0.485965	0.422765	0.134677	0.075451	0.116078
HORVU0Hr1G003890	HC_G	Phosphoadenosine phosphosulfate reductase	2.43522	125.552	331.281	168.583	63.5211	42.5774	30.1146
HORVU0Hr1G003900	HC_u	undescribed protein	14.8323	17.8328	4.26391	2.01476	2.43148	3.76709	3.02082
HORVU0Hr1G003910	HC_G	Tetratricopeptide repeat (TPR)-like superfamily protein	8.42244	10.4693	30.1162	30.9539	22.5537	21.5208	21.7962
HORVU0Hr1G003920	HC_U	unknown function	0.0605369	0.108333	0.801948	0.721163	0.78007	1.93443	4.63647
HORVU0Hr1G003930	HC_U	Protein of unknown function (DUF1005)	0.452736	3.4529	5.02428	1.7405	2.43057	2.08207	1.32642
HORVU0Hr1G003940	LC_TE	Retrotransposon protein; putative; LINE subclass	0	0	0	0	0	0	0
HORVU0Hr1G003950	HC_u	undescribed protein	0	0	0	0	0	0	0
HORVU0Hr1G003960	LC_M	undescribed protein	0	0.0652475	0.0246779	0.0521187	0.0711496	0.0382035	0
HORVU0Hr1G003970	LC_M	undescribed protein	0	0	0	0	0	0	0
HORVU0Hr1G003980	HC_G	Core-2/I-branching beta-1;6-N-acetylglucosaminyltransferase family protein	1.47827	2.66256	4.65469	1.46852	0.765538	0.375837	0.207511
HORVU0Hr1G003990	LC_TE	unknown function	0	0	0	0	0	0	0
HORVU0Hr1G004000	LC_TE	Retrotransposon protein; putative; unclassified	0	0	0	0	0	0	0
HORVU0Hr1G004010	LC_TE	Retrotransposon protein; putative; unclassified	0	0.0885222	0	0	0	0	0
HORVU0Hr1G004020	LC_u	undescribed protein	0.092415	0.450278	0.204485	0.308398	0	0.103397	0.0827983
HORVU0Hr1G004030	LC_TE	Retrotransposon protein; putative; unclassified	0	0	0	0	0	0	0
HORVU0Hr1G004040	HC_u	undescribed protein	0.338743	1.99069	0.379267	0	0.44888	0	0
HORVU0Hr1G004050	LC_u	undescribed protein	0	0.393279	0	0.253113	0.185416	0	0
HORVU0Hr1G004060	HC_G	VQ motif family protein	1.02527	8.9493	8.7159	2.68134	3.47309	3.14639	1.65473
HORVU0Hr1G004070	LC_u	undescribed protein	0.085362	0.171775	0.846855	0.259752	0.385718	0.631819	0.68116
HORVU0Hr1G004080	LC_u	undescribed protein	0	0	0	0	0	0	0
HORVU0Hr1G004090	LC_u	undescribed protein	6.62083	10.6551	35.5003	16.7883	9.63116	10.4299	7.93547
HORVU0Hr1G004100	LC_TE	Retrotransposon protein; putative; Ty3-gypsy subclass	0	0	0	0	0	0	0
HORVU0Hr1G004110	LC_u	undescribed protein	24.9216	23.6106	56.4618	63.726	18.0347	33.1686	25.3583
HORVU0Hr1G004120	HC_G	RNA polymerase II C-terminal domain phosphatase-like 4	0	0	0	0	0	0	0
HORVU0Hr1G004130	HC_G	30S ribosomal protein S11	888.148	842.245	759.891	560.353	800.176	680.005	437.743
HORVU0Hr1G004140	HC_G	Harpin-induced protein	0	0	0	0	0	0	0.948484
HORVU0Hr1G004150	HC_G	undescribed protein	2908.55	2016.03	2462.06	4177.53	4520.01	4708.65	4415.39
HORVU0Hr1G004160	HC_U	unknown protein; Has 35 Blast hits to 35 proteins in 13 species: Archae - 0; Bacteria - 0; Metazoa - 0; Fungi - 0; Plants - 33; Viruses - 0; Other Eukaryotes - 2 (source: NCBI BLink).	25.9367	20.9269	18.8586	24.3932	16.0182	11.5865	9.24481
HORVU0Hr1G004170	LC_u	undescribed protein	0	0	0	0	0	0	0
HORVU0Hr1G004180	LC_TE	Retrotransposon protein; putative; Ty1-copia subclass	0	0	0	0	0	0	0
HORVU0Hr1G004190	LC_u	undescribed protein	0	0	0	0	0	0	0
HORVU0Hr1G004200	HC_G	GTPase RsgA	7.72602	5.41185	10.1808	5.67818	3.24669	4.64866	5.78951
HORVU0Hr1G004210	LC_TE	Retrotransposon protein; putative; unclassified	0	0	0	0	0	0	0
HORVU0Hr1G004220	LC_TE	Retrotransposon protein; putative; Ty1-copia subclass	0	0	0	0	0	0	0
HORVU0Hr1G004230	LC_TE	unknown function	0.0360577	0	0.0481958	0	0.0292104	0	0.0356061
HORVU0Hr1G004240	LC_TE	Retrotransposon protein; putative; unclassified	0	0	0	0	0	0	0
HORVU0Hr1G004250	HC_G	Cell division cycle 5-like protein	0	0.289177	0.0451428	0	0	0	0
HORVU0Hr1G004260	LC_TE	unknown function	0.0360577	0	0.0481958	0	0.0292104	0	0.0356061
HORVU0Hr1G004270	HC_G	translocon at the outer membrane of chloroplasts 64-V	2.07591	5.11768	15.5281	14.123	8.24916	8.76031	12.1493
HORVU0Hr1G004280	LC_TE	Retrotransposon protein; putative; unclassified	0	0	0	0	0	0	0
HORVU0Hr1G004290	LC_TE	Retrotransposon protein; putative; unclassified	0	0	0	0	0	0	0
HORVU0Hr1G004300	HC_G	Aconitate hydratase 3; mitochondrial	0.310695	2.94017	3.71284	3.31808	2.68371	2.52816	2.88321
HORVU0Hr1G004310	LC_u	undescribed protein	0	0	0	0	0	0	0
HORVU0Hr1G004320	HC_G	SANTA (SANT associated) protein	9.11558	15.9591	25.5555	29.0594	14.9466	16.1544	15.2338
HORVU0Hr1G004330	HC_G	Heterogeneous nuclear ribonucleoprotein Q	46.3377	39.6562	62.4567	47.9149	15.0051	12.519	11.909
HORVU0Hr1G004340	LC_u	undescribed protein	0	0	0	0	0	0	0
HORVU0Hr1G004350	HC_G	translocon at the outer membrane of chloroplasts 64-V	14.9729	8.44477	43.1996	39.8628	24.5704	32.2079	36.5555
HORVU0Hr1G004360	LC_u	undescribed protein	0	0.132216	0	0	0	0	0.162949
HORVU0Hr1G004370	LC_u	undescribed protein	0.257205	0.947612	0.677483	0	0	0.16987	0.0756305
HORVU0Hr1G004380	HC_G	Cell division cycle 5-like protein	0	0.289177	0.0451428	0	0	0	0
HORVU0Hr1G004390	LC_TE	unknown function	0.264082	0	0	0	0	0	0
HORVU0Hr1G004400	HC_U	cDNA clone:001-134-A03; full insert sequence	4.16402	6.89192	13.8537	3.70994	12.7753	7.54617	4.40346
HORVU0Hr1G004410	HC_G	alpha/beta-Hydrolases superfamily protein	0	0.0223953	0.0126834	0	0.0307327	0	0.0430471
HORVU0Hr1G004420	HC_G	Regulator of chromosome condensation (RCC1) family protein	3.34122	2.16814	1.79083	1.59103	1.0736	0.681222	1.20854
HORVU0Hr1G004430	HC_G	Regulator of chromosome condensation (RCC1) family protein	0	0	0	0	0	0	0
HORVU0Hr1G004440	LC_u	undescribed protein	0	0	0	0	0	0	0
HORVU0Hr1G004450	LC_u	undescribed protein	0	0	0	0	0	0	0
HORVU0Hr1G004460	LC_u	undescribed protein	0	0	0	0	0	0	0
HORVU0Hr1G004470	HC_G	ribonuclease 2	25.3679	13.2282	10.0624	14.3072	30.9034	24.322	31.4393
HORVU0Hr1G004480	HC_G	60S acidic ribosomal protein family	121.603	91.6315	87.5022	146.661	161.47	164.112	142.547
HORVU0Hr1G004490	LC_u	undescribed protein	0	0	0	0	0	0	0
HORVU0Hr1G004500	LC_u	undescribed protein	0	0	0	0	0	0	0
HORVU0Hr1G004510	HC_U	unknown protein; Has 35 Blast hits to 35 proteins in 13 species: Archae - 0; Bacteria - 0; Metazoa - 0; Fungi - 0; Plants - 33; Viruses - 0; Other Eukaryotes - 2 (source: NCBI BLink).	0	0	0	0	0	0	0
HORVU0Hr1G004520	LC_u	undescribed protein	0	0	0	0	0	0	0
HORVU0Hr1G004530	HC_G	Cell division cycle 5-like protein	0	0.289177	0.0451428	0	0	0	0
HORVU0Hr1G004540	LC_TE	unknown function	0.0360577	0	0.0481958	0	0.0292104	0	0.0356061
HORVU0Hr1G004550	LC_u	undescribed protein	0.367703	0.507645	2.40927	1.11155	0.415275	0.18833	0.280144
HORVU0Hr1G004560	LC_TE	Retrotransposon protein; putative; unclassified	0	0	0	0	0	0	0
HORVU0Hr1G004570	LC_TE	Retrotransposon protein; putative; unclassified	0	0	0	0	0	0	0
HORVU0Hr1G004580	LC_TE	Retrotransposon protein; putative; Ty1-copia subclass	0	0	0	0	0	0	0
HORVU0Hr1G004590	LC_TE	Retrotransposon protein; putative; Ty1-copia subclass	0	0	0	0	0	0	0
HORVU0Hr1G004600	LC_TE	Retrotransposon protein; putative; Ty1-copia subclass	0	0	0	0	0	0	0
HORVU0Hr1G004610	HC_TE?	General transcription factor 2-related zinc finger protein	0.0339052	0	0.0920245	0.0545128	0	0.041359	0.0618353
HORVU0Hr1G004620	LC_u	undescribed protein	0	0	0	0	0	0	0
HORVU0Hr1G004630	HC_G	Protein LITTLE ZIPPER 4	0.147674	0.472443	1.59544	0.73384	5.17539	1.38765	0.732277
HORVU0Hr1G004640	HC_G	GRAS family transcription factor	1.11441	0.967626	0.253033	0.246706	1.00959	1.29458	0.984713
HORVU0Hr1G004650	HC_G	COBRA-like protein 6	0	0.023677	0.124697	0	0	0	0
HORVU0Hr1G004660	LC_TE	Transposon protein; putative; CACTA; En/Spm sub-class	0.265677	1.92841	1.0412	0.98632	0.841858	0.364845	0.509173
HORVU0Hr1G004670	HC_u	undescribed protein	0.55668	4.51492	3.20372	4.92572	3.65351	2.26032	1.89228
HORVU0Hr1G004680	HC_u	undescribed protein	0	0	0	0	0	0	0
HORVU0Hr1G004690	HC_G	Ubiquitin carboxyl-terminal hydrolase 27	5.10043	4.33511	8.61486	11.0966	6.08906	7.56851	6.98264
HORVU0Hr1G004700	HC_G	40S ribosomal protein S10	657.096	535.922	504.13	628.68	475.983	332.41	272.5
HORVU0Hr1G004710	LC_u	undescribed protein	0.67169	0	0	0	0.756505	0	0
HORVU0Hr1G004720	LC_TE	Gag-pol polyprotein	0	0.0213389	0	0	0	0	0
HORVU0Hr1G004730	HC_G	Ubiquitin carboxyl-terminal hydrolase 27	4.36121	4.50676	7.13141	11.8656	6.24605	5.48506	5.95111
HORVU0Hr1G004740	HC_G	SWI/SNF complex subunit SWI3C	0	0	0	0	0	0	0
HORVU0Hr1G004750	HC_G	CLE family OsCLE203 protein	0	0.106132	0.351455	0	0.369282	0.0966552	0.209128
HORVU0Hr1G004760	x	x	0.169785	0.17398	0.120024	0.186414	0.502937	1.0969	2.04634
HORVU0Hr1G004770	x	x	0	0	0	0	0	0	0
HORVU0Hr1G004780	LC_M	undescribed protein	0	0	0	0	0	0	0
HORVU0Hr1G004790	HC_U	Unplaced genomic scaffold supercont1.2; whole genome shotgun sequence	6.46135	8.73767	15.343	14.1959	18.6704	17.0908	14.5915
HORVU0Hr1G004800	HC_U	unknown protein; Has 35333 Blast hits to 34131 proteins in 2444 species: Archae - 798; Bacteria - 22429; Metazoa - 974; Fungi - 991; Plants - 531; Viruses - 0; Other Eukaryotes - 9610 (source: NCBI BLink).	0	0.188174	0.112238	0.5234	1.07332	1.01116	1.77953
HORVU0Hr1G004810	LC_u	undescribed protein	0	0	0	0	0	0	0
HORVU0Hr1G004820	LC_u	undescribed protein	0	0.790885	0.470586	0.523807	0.774466	0	0.746023
HORVU0Hr1G004830	HC_G	glyceraldehyde-3-phosphate dehydrogenase C2	0.0348167	0	0	0	1.60997	8.23829	16.4889
HORVU0Hr1G004840	LC_u	undescribed protein	0	0	0	0	0	0	0
HORVU0Hr1G004850	HC_G	Peroxidase superfamily protein	3.19131	21.1571	40.1159	12.2323	24.6983	17.7525	12.1473
HORVU0Hr1G004860	LC_TE	RNA-directed DNA polymerase (Reverse transcriptase) domain containing protein	0.117221	0.620118	0.436431	0.411015	0.0837345	0.115378	0
HORVU0Hr1G004870	HC_G	Anaphase-promoting complex subunit 2	0	0	0	0	0	0.102015	0
HORVU0Hr1G004880	LC_u	undescribed protein	0	0	0	0	0	0	0
HORVU0Hr1G004890	HC_G	WRKY DNA-binding protein 2	0.0294589	0.111581	0.123867	0.289728	0.802567	0.907913	0.754892
HORVU0Hr1G004900	HC_u	undescribed protein	0	0	0.70279	0	0.443295	0.748565	0
HORVU0Hr1G004910	HC_G	Anaphase-promoting complex subunit 2	0.203945	0.495196	0.776913	2.03111	3.6495	2.72554	3.046
HORVU0Hr1G004920	LC_u	undescribed protein	0	0.273533	0	0.341295	0.185235	0	0
HORVU0Hr1G004930	x	x	1.30915	0.798995	2.25729	6.94014	11.5237	8.01131	8.92013
HORVU0Hr1G004940	x	x	0	0	3.474	6.46641	2.94977	0	0.670394
HORVU0Hr1G004950	LC_TE	RNA-directed DNA polymerase (Reverse transcriptase) domain containing protein	0.068778	0.034282	0.105804	0.0698238	0.0214527	0.0280847	0
HORVU0Hr1G004960	HC_G	Serine/threonine protein phosphatase 2A 59 kDa regulatory subunit B' gamma isoform	0	0.0955763	0	0	0	0	0
HORVU0Hr1G004970	HC_G	26S proteasome non-ATPase regulatory subunit 6	0.616	1.59	2.02	4.24e-07	2.89	0.534	1.71
HORVU0Hr1G004980	HC_G	Anaphase-promoting complex subunit 2	0	0.0519821	0	0	0	0.077727	0
HORVU0Hr1G004990	HC_G	14-3-3-like protein GF14-B	0.074767	0	0.227206	0.105322	0.58922	0.882037	0.341934
HORVU0Hr1G005000	HC_G	Pentatricopeptide repeat-containing protein	0.108336	0.410359	0.189593	1.34342	0.495732	0.356091	0.579797
HORVU0Hr1G005010	HC_U	unknown function	0	0	0.080892	0.347391	0.490528	0	0.143235
HORVU0Hr1G005020	HC_G	Protein kinase superfamily protein	2.55411	25.8107	7.23757	2.14321	2.61124	2.0306	1.05063
HORVU0Hr1G005030	LC_U	unknown function	0	0	0	0.643077	0	0	0
HORVU0Hr1G005040	LC_TE?	Autophagy-related protein 7	0	0	0	0	0	0	0
HORVU0Hr1G005050	HC_TE?	unknown function	0	0	0	0	0.438403	1.53519	1.41547
HORVU0Hr1G005060	HC_G	Peroxidase superfamily protein	0.0392914	0.0404712	0.161413	1.4	2.69452	1.06253	0.350259
HORVU0Hr1G005070	HC_TE?	F-box protein	14.4647	16.5772	14.5349	9.92093	7.79648	7.05308	7.97774
HORVU0Hr1G005080	LC_TE?	undescribed protein	0	0	0.117644	0.0333425	0	0	0
HORVU0Hr1G005090	HC_u	undescribed protein	0	0.0595147	0.0120459	0.457762	0.0301767	0.27599	0.0855975
HORVU0Hr1G005100	HC_G	myb domain protein 79	2.68948	1.31812	1.21766	1.66481	0.546258	0.165949	0.50228
HORVU0Hr1G005110	LC_TE	Retrotransposon protein; putative; Ty1-copia subclass	0	0	0	0	0	0	0
HORVU0Hr1G005120	HC_G	Lung seven transmembrane receptor family protein	0	0	0	0	0	0	0
HORVU0Hr1G005130	HC_G	NAC transcription factor	0.0249829	0.01296	0	0	0	0.0118029	0
HORVU0Hr1G005140	HC_G	alpha/beta-Hydrolases superfamily protein	12.8196	11.0732	2.6836	0.369226	0.668364	0.693284	1.02325
HORVU0Hr1G005150	HC_TE?	Zinc finger (C3HC4-type RING finger) family protein	0.053844	1.8693	0.541423	0.274382	1.39542	1.38461	0.85143
HORVU0Hr1G005160	HC_G	L-allo-threonine aldolase	0.548139	0.281546	0.556613	2.05804	7.04398	4.30553	5.56112
HORVU0Hr1G005170	LC_u	undescribed protein	0	0	0	0	0	0	0
HORVU0Hr1G005180	HC_G	Caleosin-related family protein	0	0.0358603	0.0384997	0	0.216682	1.27574	1.60384
HORVU0Hr1G005190	x	x	5.77244	3.59828	3.59698	1.44037	1.2531	0.280766	0.127476
HORVU0Hr1G005200	HC_G	sugar transporter 6	0	0	0	0	0	0	0
HORVU0Hr1G005210	HC_G	Protein of unknown function; DUF584	3.28488	7.46422	16.8173	5.20509	1.91574	0.845663	0.492392
HORVU0Hr1G005220	LC_TE	unknown function	0	0	0	0	0.0367912	0	0
HORVU0Hr1G005230	HC_G	Subtilisin-like protease SBT3.17	0	0	0.0657568	0	0	0	0
HORVU0Hr1G005240	HC_G	Cytokinin dehydrogenase 8	0.0292375	0.655755	0.463045	1.43104	0.516412	0.476003	0.775557
HORVU0Hr1G005250	HC_G	Aquaporin-like superfamily protein	5.51882	6.27517	2.47423	0.135215	0.172378	0.0865432	0.0672648
HORVU0Hr1G005260	HC_G	Hexosyltransferase	0.235983	0.239997	1.51605	1.00011	2.40972	3.44931	2.94313
HORVU0Hr1G005270	x	x	0	0	0	0	0.0385348	0.106659	0.352565
HORVU0Hr1G005280	LC_u	undescribed protein	0	0	0	0	0	0	0
HORVU0Hr1G005290	HC_G	BTB/POZ domain-containing protein	1.49525	1.80502	4.31512	8.42158	6.35735	5.18747	6.59398
HORVU0Hr1G005300	HC_G	2-oxoglutarate (2OG) and Fe(II)-dependent oxygenase superfamily protein	1.28385	1.63631	3.71536	3.19284	8.93318	10.608	8.18782
HORVU0Hr1G005310	LC_TE	HAT family dimerisation domain containing protein; expressed	0	0	0	0	0	0	0
HORVU0Hr1G005320	HC_G	IQ-domain 22	2.79753	13.876	44.7293	14.1322	15.5091	10.1154	6.47782
HORVU0Hr1G005330	HC_G	RING/U-box superfamily protein	0.368828	1.66664	3.24324	2.97303	5.39973	5.01215	4.14777
HORVU0Hr1G005340	x	x	0.206908	0.400213	0.690547	0.333581	0.385115	0.277902	0.365655
HORVU0Hr1G005350	HC_TE?	Argonaute family protein	0.106083	0.093047	0.742515	1.34949	1.22592	0.984656	1.00633
HORVU0Hr1G005360	HC_G	serine carboxypeptidase-like 19	0	0.0200667	0.0244123	0	0.0103633	0.512858	1.03634
HORVU0Hr1G005370	LC_TE?	Argonaute family protein	0.0978118	1.0447	2.5821	4.73349	0.86491	0.851082	1.03339
HORVU0Hr1G005380	HC_G	Heterogeneous nuclear U-like protein; putative	2.2152	1.12443	3.44922	0.89488	1.84481	0.491787	1.08415
HORVU0Hr1G005390	LC_u	undescribed protein	0	0	0	0	0	0	0
HORVU0Hr1G005400	HC_G	calcium-transporting ATPase; putative	27.169	27.9365	20.1556	15.3799	12.9744	22.2802	37.7631
HORVU0Hr1G005410	HC_G	FAR1-related sequence 4	0	0	0	0.0353847	0	0.0321837	0
HORVU0Hr1G005420	HC_G	Ubiquinol oxidase	0.178818	1.22612	0.45842	0.232538	0.864664	0.648341	0.364358
HORVU0Hr1G005430	HC_u	undescribed protein	3.2934	34.6551	18.2079	6.13406	5.76732	12.1983	5.53957
HORVU0Hr1G005440	LC_u	undescribed protein	3.90581	36.1845	12.7255	5.08698	3.15754	2.65512	3.11377
HORVU0Hr1G005450	LC_u	undescribed protein	0	0	0.0291015	0	0.308973	0.162804	0.129906
HORVU0Hr1G005460	LC_TE	undescribed protein	0	0	0	0	0	0	0
HORVU0Hr1G005470	LC_TE?	Protein of unknown function (DUF581)	0	0	0	0	0	0	0
HORVU0Hr1G005480	HC_U	unknown protein; BEST Arabidopsis thaliana protein match is: unknown protein .	0	0	0	0	0	0	0
HORVU0Hr1G005490	HC_G	expansin B2	0	0	0	0	6.07945	14.5323	7.2321
HORVU0Hr1G005500	HC_G	Small subunit ribosomal protein	11.651	8.04004	16.6877	36.6851	45.1372	35.5857	29.6709
HORVU0Hr1G005510	HC_U	cDNA clone:J013127I09; full insert sequence	0.050105	0.026304	0	0.130924	0.123553	0.117858	0.0764868
HORVU0Hr1G005520	HC_TE?	Protein of unknown function (DUF581)	5.47532	34.2182	44.8958	18.4851	14.7055	10.0328	8.19053
HORVU0Hr1G005530	LC_TE	Transposon protein	0.502489	0.633835	0.539349	0.230327	2.56391	1.18707	1.00801
HORVU0Hr1G005540	HC_G	starch synthase 3	0	0	0	0	0	0	0
HORVU0Hr1G005550	HC_G	starch synthase 3	0	0	0	0	0	0	0
HORVU0Hr1G005560	HC_u	undescribed protein	0	0	0	0	0	0	0
HORVU0Hr1G005570	HC_G	Ribulose bisphosphate carboxylase/oxygenase activase 2; chloroplastic	4.40825	1.56038	2.23377	1.27086	1.74436	1.77436	2.49301
HORVU0Hr1G005580	LC_U	unknown function	17.0757	17.3936	24.3252	26.6248	13.061	13.0516	15.3382
HORVU0Hr1G005590	HC_G	Disease resistance protein	0	0.0331402	0.00222531	0	0	0	0
HORVU0Hr1G005600	HC_G	CYCLIN B1;1	0	0	0	0	0	0	0
HORVU0Hr1G005610	HC_G	Disease resistance protein RPM1	0	0.0351773	0.0404057	0.22081	1.33024	1.75904	1.22589
HORVU0Hr1G005620	HC_G	Disease resistance protein RPM1	0	0	0.0121647	0	0	0.0589905	0.04739
HORVU0Hr1G005630	LC_u	undescribed protein	0	0	0	0	0	0	0
HORVU0Hr1G005640	HC_G	oligopeptide transporter 4	0	0	0	0	0	0	0
HORVU0Hr1G005650	LC_U	unknown function	23.3016	30.0955	48.4042	57.8231	29.899	27.6547	33.107
HORVU0Hr1G005660	HC_U	unknown function	0.614325	0.817049	0.260333	0.0510747	0.164789	0.145661	0.0184785
HORVU0Hr1G005670	HC_G	DNA-directed RNA polymerase D subunit 2b	15.0893	8.55375	9.64856	11.8182	18.4219	14.5843	13.1976
HORVU0Hr1G005680	HC_G	Cation/H(+) antiporter 15	0	0	0	0	0	0	0
HORVU0Hr1G005690	HC_U	Protein of unknown function; DUF617	0	0	0	0	0	0	0.0131926
HORVU0Hr1G005700	HC_G	Nucleotide-diphospho-sugar transferase family protein	0	0	0	0	1.2226	3.70562	3.93538
HORVU0Hr1G005710	LC_u	undescribed protein	0	0	0	0	0	0	0
HORVU0Hr1G005720	HC_G	Pyruvate kinase family protein	12.6933	34.55	65.4763	58.1749	15.4314	11.3153	15.0235
HORVU0Hr1G005730	HC_G	Chromosome 3B; genomic scaffold; cultivar Chinese Spring	0	0	0	0	0	0	0
HORVU0Hr1G005740	LC_M	undescribed protein	0	0	0	0	0	0	0
HORVU0Hr1G005750	HC_U	unknown function	0.0241717	0.024724	0.139703	0.0641325	1.40212	1.87354	1.08511
HORVU0Hr1G005760	LC_U	unknown protein; BEST Arabidopsis thaliana protein match is: unknown protein .	15.7554	31.6668	13.2623	3.44589	2.85499	2.46074	2.18566
HORVU0Hr1G005770	HC_G	actin-related protein 6	6.31853	4.39184	10.269	11.6385	4.83242	3.73142	3.73548
HORVU0Hr1G005780	LC_u	undescribed protein	0	0	0	0	0	0	0
HORVU0Hr1G005790	HC_G	Acyl-CoA-binding domain-containing protein 1	0	0	0	0	0	0	0
HORVU0Hr1G005800	LC_u	undescribed protein	0.517805	0	0	0	0	0	0
HORVU0Hr1G005810	x	x	0	0	0	0	0.147	0.079	2.99e-09
HORVU0Hr1G005820	HC_G	U4/U6.U5 tri-snRNP-associated protein 1	153.764	109.072	200.389	174.017	64.7049	69.7561	62.5667
HORVU0Hr1G005830	x	x	0	0	0	0	0	0	0
HORVU0Hr1G005840	HC_G	ATP binding cassette subfamily A4	0	0.124882	0.0681932	0	0.0651593	0.0764622	0
HORVU0Hr1G005850	HC_G	Peroxidase superfamily protein	0	0	0	0	0	0	0
HORVU0Hr1G005860	HC_G	Eukaryotic aspartyl protease family protein	2.20342	3.56598	4.90078	8.54716	32.8398	20.0452	15.0922
HORVU0Hr1G005870	HC_G	receptor kinase 3	0.285842	0.26636	1.42076	4.07388	4.01329	4.9424	8.11922
HORVU0Hr1G005880	LC_u	undescribed protein	0	0	0	0	0	0	0
HORVU0Hr1G005890	HC_G	HAD superfamily; subfamily IIIB acid phosphatase	0	0	0	0.204643	0.312395	0.44313	0
HORVU0Hr1G005900	HC_G	Cytochrome P450 superfamily protein	0	0.0437762	0.207237	0.224357	3.30942	3.68059	1.41694
HORVU0Hr1G005910	HC_u	undescribed protein	0	0	0	0	0	0	0
HORVU0Hr1G005920	HC_G	Pentatricopeptide repeat-containing protein	0.661215	0.606523	0.54104	1.07244	2.3979	3.59162	6.14619
HORVU0Hr1G005930	LC_u	undescribed protein	0	0	0	0	0	0	0
HORVU0Hr1G005940	LC_u	undescribed protein	0	0	0	0	0	0	0
HORVU0Hr1G005950	LC_u	undescribed protein	0	0	0	0	0	0	0
HORVU0Hr1G005960	HC_U	Chromosome 3B; genomic scaffold; cultivar Chinese Spring	35.0153	40.2941	24.92	8.7927	11.5627	11.7195	9.2877
HORVU0Hr1G005970	HC_G	undescribed protein	0	0	0	0	0	0	0
HORVU0Hr1G005980	LC_u	undescribed protein	0	0.205219	0.113134	0.264894	0.171354	0.0897002	0
HORVU0Hr1G005990	LC_u	undescribed protein	0	0	0	0.632317	0	0	0
HORVU0Hr1G006000	LC_u	undescribed protein	0	0	0	0	0	0	0
HORVU0Hr1G006010	x	x	0	0	0	0	0	0	0
HORVU0Hr1G006020	HC_G	Ribosomal protein L6 family	146.673	155.253	219.323	206.385	129.583	93.3312	78.5242
HORVU0Hr1G006030	LC_u	undescribed protein	112.079	101.534	152.613	187.85	106.889	75.3354	50.6291
HORVU0Hr1G006040	HC_G	60S ribosomal protein L9	0	0	0	0	0	0	0
HORVU0Hr1G006050	HC_G	receptor-like protein kinase 4	0	0	0	0	0	0	0
HORVU0Hr1G006060	LC_U	unknown function	0.0562527	0	0.125964	0.069874	0.0511858	0	0
HORVU0Hr1G006070	HC_G	receptor-like protein kinase 4	0	0	0	0	0.02911	0.0818878	0.043301
HORVU0Hr1G006080	HC_G	receptor-like protein kinase 4	0	0	0	0	1.08e-05	1.99e-05	2.02e-05
HORVU0Hr1G006090	HC_G	Acylamino-acid-releasing enzyme	0	0	0	0.0199147	0	0.0116941	0
HORVU0Hr1G006100	HC_G	Receptor-like protein kinase	0	0	0	0	0	0	0
HORVU0Hr1G006110	x	x	0.0442352	0	0.0243947	0.0422146	0.026521	0.0332749	0.0549155
HORVU0Hr1G006120	HC_G	E3 ubiquitin-protein ligase SINA-like 7	1.08121	0.654798	0.702962	2.65961	5.63237	3.63916	2.43496
HORVU0Hr1G006130	HC_G	E3 ubiquitin-protein ligase SINA-like 7	0.365777	0.173013	0.179304	0.827012	0.898324	0.810457	0.697094
HORVU0Hr1G006140	HC_G	receptor-like protein kinase 4	0	0	0	0	0	0	0
HORVU0Hr1G006150	HC_G	receptor kinase 1	0	0.0666703	0.0249137	0.0560837	0.131103	0.144927	0.0660281
HORVU0Hr1G006160	HC_G	receptor-like protein kinase 4	0	0	0	0	0	0	0
HORVU0Hr1G006170	HC_G	Cytochrome P450 superfamily protein	0	0.0187311	0	0.351728	0.265328	0.0978276	0.0705286
HORVU0Hr1G006180	x	x	0	0.0154752	0	0.0196468	0.088281	0.128459	0.0715685
HORVU0Hr1G006190	HC_G	Mitochondrial glycoprotein family protein	195.736	138.451	137.702	201.244	111.71	79.2595	69.8554
HORVU0Hr1G006200	LC_u	undescribed protein	0	0	0	0	0	0	0
HORVU0Hr1G006210	HC_G	PHD-finger family protein; expressed	0	0	0	0	0	0	0
HORVU0Hr1G006220	x	x	0.476644	0.259775	0.578943	0.548422	1.11076	0.865891	1.34473
HORVU0Hr1G006230	x	x	0	0	0	0	0	0.00684955	0.0085811
HORVU0Hr1G006240	HC_G	unknown function	495.01	440.514	168.877	74.4588	115.971	171.132	195.92
HORVU0Hr1G006250	HC_U	unknown protein; Has 1807 Blast hits to 1807 proteins in 277 species: Archae - 0; Bacteria - 0; Metazoa - 736; Fungi - 347; Plants - 385; Viruses - 0; Other Eukaryotes - 339 (source: NCBI BLink).	19.0798	19.9628	50.6003	51.124	45.1174	49.5228	49.9119
HORVU0Hr1G006260	HC_G	Minor spike protein	0.682692	2.12694	6.23264	0.56729	0.186933	0.277077	0.70977
HORVU0Hr1G006270	HC_G	Acidic endochitinase	0	0	0	0	0	0	0
HORVU0Hr1G006280	HC_G	Protein SUPPRESSOR OF GENE SILENCING 3 homolog	0	0	0	0	0	0	0
HORVU0Hr1G006290	HC_G	Peroxidase superfamily protein	0.929914	2.63498	4.23701	0.980629	1.15692	0.503139	0.700993
HORVU0Hr1G006300	HC_G	Histidyl-tRNA synthetase	0	0	0	0	0	0	0
HORVU0Hr1G006310	LC_u	undescribed protein	0	0	0	0	0	0	0
HORVU0Hr1G006320	LC_U	unknown function	0	0	0	0	0	0	0
HORVU0Hr1G006330	HC_G	RHOMBOID-like protein 3	0	0	0	0	0	0	0
HORVU0Hr1G006340	HC_G	cell division cycle 48	0.00532695	0.0224541	0.0727538	0.0203626	0.0483978	0.0612645	0.0540437
HORVU0Hr1G006350	HC_U	Chromosome 3B; genomic scaffold; cultivar Chinese Spring	31.0278	11.1073	18.3164	41.0331	27.178	21.2406	38.5338
HORVU0Hr1G006360	HC_G	Translation elongation factor EF1B/ribosomal protein S6 family protein	0	0.0928672	0.204936	0.223311	0.0862325	0	0
HORVU0Hr1G006370	HC_G	Indole-3-glycerol phosphate lyase; chloroplastic	0	0	0	0	0	0	0
HORVU0Hr1G006380	HC_G	ERI1 exoribonuclease 2	9.32192	25.6021	21.481	6.73316	1.14437	0.601778	0.184261
HORVU0Hr1G006390	LC_u	undescribed protein	0	0.0948477	0	0	0	0	0
HORVU0Hr1G006400	LC_TE	unknown function	0	0.101935	0.121278	0.135024	0.0544378	0	0
HORVU0Hr1G006410	HC_G	Myosin-J heavy chain	0.350679	0.48753	1.20504	0.390307	0.325315	0.279858	0.378115
HORVU0Hr1G006420	HC_G	Histone H2B.3	13.333	13.0243	29.2824	30.9685	149.623	165.359	180.668
HORVU0Hr1G006430	HC_G	Cell division control 48-E-like protein	0	0	0.0306805	0	0.0380047	0.078389	0.0280437
HORVU0Hr1G006440	HC_U	Uncharacterised conserved protein (UCP012943)	2.71423	2.82276	0.804329	4.30462	1.38948	1.45178	2.37526
HORVU0Hr1G006450	HC_G	carotenoid cleavage dioxygenase 7	0.0295738	0.289841	0.137165	0.0485233	0.0140416	0.0536741	0.00949368
HORVU0Hr1G006460	HC_G	Acetylglutamate kinase	0	0	0	0	0	0	0
HORVU0Hr1G006470	HC_G	Nucleoporin GLE1	0	0.086098	0	0	0	0	0.0810613
HORVU0Hr1G006480	LC_U	unknown function	0.110297	0.820615	1.28876	0.494967	0.50739	0.379474	0.573615
HORVU0Hr1G006490	LC_u	undescribed protein	0	0	0	0	0	0	0
HORVU0Hr1G006500	LC_TE	unknown function	0.0295933	0.179082	0.178018	0.238334	0.168627	0.157878	0.373388
HORVU0Hr1G006510	LC_u	undescribed protein	0	0	0	0	0	0	0
HORVU0Hr1G006520	HC_G	Piezo-type mechanosensitive ion channel homolog	0.177135	0.19886	1.22084	2.74953	3.25801	2.69448	3.07777
HORVU0Hr1G006530	LC_u	undescribed protein	0	0	0	0	0	0	0
HORVU0Hr1G006540	LC_TE	Retrotransposon protein; putative; unclassified	0.0679343	0.215973	0	0	0	0	0
HORVU0Hr1G006550	HC_G	alpha/beta-Hydrolases superfamily protein	0	0	0	0	0	0	0
HORVU0Hr1G006560	HC_U	unknown function	0	0.044715	0.291741	0	0	0	0
HORVU0Hr1G006570	LC_u	undescribed protein	0	0	0	0	0	0	0
HORVU0Hr1G006580	HC_U	unknown function	0	0	0	0	0	0	0
HORVU0Hr1G006590	LC_TE	unknown function	0	0	0	0	0	0	0
HORVU0Hr1G006600	HC_G	Peptide chain release factor 1	0	0	0	0	0	0	0
HORVU0Hr1G006610	x	x	103.596	75.1979	194.818	168.815	65.0618	50.3608	46.2242
HORVU0Hr1G006620	HC_G	Piezo-type mechanosensitive ion channel homolog	0.259746	0.144884	1.5498	2.97293	3.22889	3.40357	4.61547
HORVU0Hr1G006630	HC_G	Exocyst complex component 6	6.53345	13.5986	26.536	25.355	24.5941	26.9603	34.517
HORVU0Hr1G006640	HC_G	WD40 repeat-containing protein SMU1	7.92131	4.37589	15.7999	49.0653	39.3084	29.2193	30.4772
HORVU0Hr1G006650	x	x	1.55284	4.55187	2.43078	0.970964	0.550108	2.00164	3.25079
HORVU0Hr1G006660	LC_M	undescribed protein	0	0	0	0	0	0	0
HORVU0Hr1G006670	LC_u	undescribed protein	8.42031	12.9757	9.97755	5.39967	3.70058	3.76408	2.4388
HORVU0Hr1G006680	HC_G	CRS2-associated factor 2; chloroplastic	2.86028	3.86015	13.0305	8.19299	4.03555	3.38241	4.65537
HORVU0Hr1G006690	LC_TE	Retrotransposon protein; putative; Ty1-copia subclass	0	0	0.0384077	0	0.0340777	0	0
HORVU0Hr1G006700	LC_TE	Retrotransposon protein; putative; Ty1-copia subclass	0	0.0337866	0	0	0	0	0
HORVU0Hr1G006710	LC_TE	Retrotransposon protein; putative; Ty1-copia subclass	0	0	0	0	0	0	0
HORVU0Hr1G006720	HC_U	Chromosome 3B; genomic scaffold; cultivar Chinese Spring	0	0.0287785	0	0.0834872	0	0	0
HORVU0Hr1G006730	LC_u	undescribed protein	0.661583	1.34216	0.896726	1.34728	1.8052	0.768328	1.16455
HORVU0Hr1G006740	HC_G	phosphate transporter 2	0	0	0	0	0	0	0
HORVU0Hr1G006750	HC_G	Werner syndrome-like exonuclease	0	0.0599315	0.314221	0.497462	1.43893	1.5277	1.23461
HORVU0Hr1G006760	LC_U	unknown protein; Has 3099 Blast hits to 2528 proteins in 332 species: Archae - 2; Bacteria - 245; Metazoa - 1059; Fungi - 555; Plants - 177; Viruses - 49; Other Eukaryotes - 1012 (source: NCBI BLink).	5.0851	5.61808	8.48932	6.79366	2.9099	2.77621	2.82558
HORVU0Hr1G006770	HC_G	Adenylate isopentenyltransferase	0	0	0.0450735	0	0.274857	0.193762	0.12536
HORVU0Hr1G006780	LC_u	undescribed protein	0	0	0	0	0	0	0
HORVU0Hr1G006790	HC_G	ERI1 exoribonuclease 2	19.1068	24.415	40.9344	18.0989	24.8765	20.4771	14.2919
HORVU0Hr1G006800	HC_G	GDSL esterase/lipase	5.30429	33.9795	53.1276	13.6381	38.653	39.2093	21.9129
HORVU0Hr1G006810	HC_G	myb domain protein 5	0.132292	0.253971	0.0708903	0.0377255	0.143276	0.139285	0.100769
HORVU0Hr1G006820	x	x	56.0538	35.0757	37.1686	55.2353	17.2946	18.0906	18.7524
HORVU0Hr1G006830	HC_U	Chromosome 3B; genomic scaffold; cultivar Chinese Spring	0	0	0	0	0.0558577	0	0.158286
HORVU0Hr1G006840	LC_u	undescribed protein	0	0	0.272336	0.174869	0	0	0
HORVU0Hr1G006850	LC_U	unknown function	0	0.0202216	0.159082	0.165164	0.323286	0.218522	0.27371
HORVU0Hr1G006860	LC_TE	Retrotransposon protein; putative; unclassified	0	0	0	0	0	0	0
HORVU0Hr1G006870	LC_TE	Retrotransposon protein; putative; unclassified	0	0	0	0	0	0	0
HORVU0Hr1G006880	LC_TE	unknown function	0	0	0	0	0	0	0
HORVU0Hr1G006890	HC_G	Transcription factor PCF7	0.722424	0.938276	1.04885	0.973639	3.16464	3.83887	4.0634
HORVU0Hr1G006900	LC_u	undescribed protein	0	0	0	0	0	0	0
HORVU0Hr1G006910	LC_TE	unknown function	0	0.178629	0.10484	0	0	0	0
HORVU0Hr1G006920	HC_G	Homeobox-leucine zipper protein family	0	0.128599	0.143363	0	0	0	0
HORVU0Hr1G006930	HC_G	Chaperone protein DnaK	0.857389	2.04479	2.25077	3.70384	1.17205	0.90522	0.624676
HORVU0Hr1G006940	HC_G	ARM repeat superfamily protein	2.37921	2.82687	10.0265	20.4485	20.8422	22.3532	29.2825
HORVU0Hr1G006950	HC_G	casein kinase 1	0.298934	0.163786	0.17134	0	0.133739	0	0
HORVU0Hr1G006960	HC_G	Protein MON2 homolog	1.11497	3.23331	11.2435	22.1559	22.2016	22.1716	38.8025
HORVU0Hr1G006970	LC_TE	unknown function	0.345779	0.600808	0.650477	0.0724525	0.0589325	0	0
HORVU0Hr1G006980	HC_G	unknown function	0.156091	0.50892	1.65053	1.01414	3.66572	2.16946	2.07545
HORVU0Hr1G006990	LC_TE?	unknown function	0	0	0	0	0	0	0
HORVU0Hr1G007000	HC_G	ARM repeat superfamily protein	0	0	0	0	0	0	0
HORVU0Hr1G007010	LC_TE	RNA-directed DNA polymerase (reverse transcriptase)-related family protein	0	0	0	0	0	0	0
HORVU0Hr1G007020	HC_G	ARM repeat superfamily protein	0.0694328	0.0877778	0.451172	0.323022	0.0621	0.0843953	0.083631
HORVU0Hr1G007030	HC_G	Protein ULTRAPETALA 1	0.0538532	0.0691165	0	0	0.124586	0.060005	0.120425
HORVU0Hr1G007040	LC_u	undescribed protein	0.0620167	1.51148	0.610335	0.349499	0.0906795	0.0972868	0.0718167
HORVU0Hr1G007050	HC_G	Ethylene-responsive transcription factor 4	4.55031	15.5105	16.9231	5.11727	2.75713	1.89648	1.14181
HORVU0Hr1G007060	LC_u	undescribed protein	0	0	0	0	0	0	0
HORVU0Hr1G007070	HC_G	Protein kinase superfamily protein	0.19341	0.212607	0.178861	0.455759	0.521019	0.586546	0.49017
HORVU0Hr1G007080	x	x	31.1313	11.7912	13.2847	33.2994	22.1682	9.12513	7.8622
HORVU0Hr1G007090	HC_G	Polyphenol oxidase A1; chloroplastic	0.0426059	0	0	0.0282442	0.071512	0	0
HORVU0Hr1G007100	HC_u	undescribed protein	0	0	0	0	0	0	0
HORVU0Hr1G007110	HC_G	Lung seven transmembrane receptor family protein	0.0580237	1.02574	1.26961	0.40305	1.12665	0.503994	0.478565
HORVU0Hr1G007120	LC_u	undescribed protein	0	0	0	0	0	0	0
HORVU0Hr1G007130	HC_G	ABC transporter G family member 2	0	0	0.0032748	0	0.0160348	0.465492	0.625808
HORVU0Hr1G007140	x	x	0	0	0	0	0	0	0
HORVU0Hr1G007150	HC_G	Nuclear transport factor 2 (NTF2) family protein with RNA binding (RRM-RBD-RNP motifs) domain	24.5739	21.886	35.4844	65.3494	33.7151	24.1201	18.6786
HORVU0Hr1G007160	x	x	0	0	0	0	0	0	0
HORVU0Hr1G007170	HC_G	undescribed protein	0	0	0	0	0	0	0
HORVU0Hr1G007180	LC_TE	Mutator protein	0	0	0	0	0	0	0
HORVU0Hr1G007190	HC_TE?	unknown function	0.0783711	0.0903495	0.003705	0.139555	0.00693685	0.0142601	0.00303688
HORVU0Hr1G007200	LC_U	Chromosome 3B; genomic scaffold; cultivar Chinese Spring	0.144318	0.0750984	0.119852	0.719301	0.942276	0.793371	0.761961
HORVU0Hr1G007210	HC_U	unknown function	0.107689	0.250398	0.633742	0.0198748	0.25006	0.0354986	0.061673
HORVU0Hr1G007220	HC_u	undescribed protein	0	0	0.053977	0	3.99863	2.9305	2.74147
HORVU0Hr1G007230	LC_TE?	unknown function	1.98192	2.93599	10.6765	6.6375	3.27114	2.84086	2.72427
HORVU0Hr1G007240	HC_u	undescribed protein	0	0	0	0	1.27809	0.652389	0.095709
HORVU0Hr1G007250	LC_u	undescribed protein	0	0	0	0	0	0	0
HORVU0Hr1G007260	HC_u	undescribed protein	0	0	0	0	0	0	0
HORVU0Hr1G007270	LC_u	undescribed protein	0	0	0	0	0	0	0
HORVU0Hr1G007280	HC_U	unknown protein; BEST Arabidopsis thaliana protein match is: unknown protein .	0.843723	1.39946	1.01302	0.622495	0	0	0
HORVU0Hr1G007290	LC_u	undescribed protein	0	0	0	0	0	0	0
HORVU0Hr1G007300	LC_TE	unknown function	0	0	0	0.204872	0	0	0
HORVU0Hr1G007310	LC_U	unknown function	4.34643	9.05111	5.95376	3.92211	1.92172	1.50693	0.355326
HORVU0Hr1G007320	HC_G	pentatricopeptide repeat 336	1.10602	1.30991	1.77168	2.11716	2.46432	2.98798	3.86774
HORVU0Hr1G007330	HC_U	Protein of Unknown Function (DUF239)	0	0	0	0	0	0	0
HORVU0Hr1G007340	HC_G	Progesterone 5 beta reductase	4.61238	14.101	16.2105	6.454	26.6479	59.1853	33.7116
HORVU0Hr1G007350	LC_u	undescribed protein	0	0	0	0	0	0	0
HORVU0Hr1G007360	HC_G	Chlorophyllide a oxygenase; chloroplastic	1.11216	0.45984	0.0960713	0.216986	0.299739	1.71823	2.86959
HORVU0Hr1G007370	HC_G	UDP-Glycosyltransferase superfamily protein	0.101799	0.016504	0	0.0181667	0.683494	1.51836	2.3628
HORVU0Hr1G007380	HC_G	RNA-binding KH domain-containing protein	12.091	7.90195	22.3079	26.4204	16.0645	12.091	11.9927
HORVU0Hr1G007390	x	x	0.020985	0.201639	2.33523	2.60871	2.037	0.833608	0.609849
HORVU0Hr1G007400	LC_TE	Retrotransposon protein; putative; unclassified	0	0	0	0	0	0	0
HORVU0Hr1G007410	HC_U	Chromosome 3B; genomic scaffold; cultivar Chinese Spring	8.6439	10.7343	3.37425	4.25379	3.30891	2.59424	0.420205
HORVU0Hr1G007420	HC_u	undescribed protein	2.11744	3.07933	9.43556	7.94473	5.55571	6.07913	5.53974
HORVU0Hr1G007430	HC_G	CAP (Cysteine-rich secretory proteins; Antigen 5; and Pathogenesis-related 1 protein) superfamily protein	0	0	0	0	0	0	0
HORVU0Hr1G007440	LC_u	undescribed protein	0	0	0	0	0	0	0
HORVU0Hr1G007450	HC_G	Lectin	0	0	0	0	0	0	0
HORVU0Hr1G007460	HC_G	alpha/beta-Hydrolases superfamily protein	1.43049	0.821472	1.41257	2.33011	2.42527	1.87559	2.74614
HORVU0Hr1G007470	HC_G	Jasmonate induced protein	2.93707	2.84781	1.80736	4.80891	14.2346	22.8948	39.7376
HORVU0Hr1G007480	HC_G	23 kDa jasmonate-induced protein	0.0873225	0.0263943	0	0	0	0	0
HORVU0Hr1G007490	LC_u	undescribed protein	0	0	0	0	0	0	0
HORVU0Hr1G007500	LC_u	undescribed protein	0	0	0	0	0	0	0
HORVU0Hr1G007510	LC_u	undescribed protein	0	0	0	0	0	0	0
HORVU0Hr1G007520	HC_G	mediator subunit 8	0	0	0	0	0	0	0
HORVU0Hr1G007530	LC_u	undescribed protein	0	0	0	0	0	0	0
HORVU0Hr1G007540	HC_G	RNA-binding (RRM/RBD/RNP motifs) family protein	0	0	0	0	0	0	0
HORVU0Hr1G007550	LC_u	undescribed protein	0	0	0	0	0	0	0
HORVU0Hr1G007560	LC_u	undescribed protein	0	0	0	0	0	0	0
HORVU0Hr1G007570	LC_TE	Gag-pol polyprotein	0	0.0213389	0.0071635	0	0.000447325	0.000322088	0.00683972
HORVU0Hr1G007580	HC_G	Protein MEI2-like 7	0	0	0	0	0	0	0
HORVU0Hr1G007590	LC_u	undescribed protein	0	0	0	0	0	0	0
HORVU0Hr1G007600	LC_TE	Gag-pol polyprotein	0	0	0	0	0.0274063	0	0.00228612
HORVU0Hr1G007610	LC_u	undescribed protein	0	0	0	0	0	0	0
HORVU0Hr1G007620	HC_G	Leucine-rich receptor-like protein kinase family protein	0	0.0147709	0.0468881	0.260334	1.09239	1.8141	0.516513
HORVU0Hr1G007630	HC_G	CCR4-NOT transcription complex subunit 3	0	0	0	0	0	0	0
HORVU0Hr1G007640	HC_u	undescribed protein	0	0	0	0	0	0	0
HORVU0Hr1G007650	HC_TE?	Zinc finger protein 593 homolog	232.929	197.205	231.132	216.959	189.821	159.952	121.332
HORVU0Hr1G007660	x	x	1.52933	2.77972	3.67588	2.42217	1.06258	0.612132	0.421419
HORVU0Hr1G007670	x	x	0	0	0	0	0	0	0
HORVU0Hr1G007680	HC_TE?	inositol polyphosphate 5-phosphatase 11	0	1.501	0.442727	0.141456	0.016078	0.684556	0.445655
HORVU0Hr1G007690	HC_U	unknown protein; Has 2862 Blast hits to 2331 proteins in 349 species: Archae - 6; Bacteria - 408; Metazoa - 833; Fungi - 223; Plants - 134; Viruses - 7; Other Eukaryotes - 1251 (source: NCBI BLink).	0.0455918	0.0246846	0.0460598	0.0221604	11.2074	18.4047	19.9955
HORVU0Hr1G007700	HC_G	P-loop containing nucleoside triphosphate hydrolases superfamily protein	9.46799	6.82418	4.9721	4.2034	5.2154	4.33634	0.483888
HORVU0Hr1G007710	LC_u	undescribed protein	0	0	0	0	0	0	0
HORVU0Hr1G007720	HC_G	B3 domain-containing protein	0.074738	0.0225053	0.056382	0.0625471	0.121322	0.0979108	0.103248
HORVU0Hr1G007730	HC_G	B3 domain-containing protein	0	0	0.00663883	0	0.27042	0.291922	0.128312
HORVU0Hr1G007740	HC_G	B3 domain-containing protein	0.124989	0.0719381	0.0662325	0.104772	0.200604	0.168826	0.186402
HORVU0Hr1G007750	x	x	1.74137	7.88352	12.993	4.80576	13.4579	7.93927	5.86811
HORVU0Hr1G007760	HC_G	Disease resistance protein (CC-NBS-LRR class) family	0	0	0	0	0	0	0
HORVU0Hr1G007770	HC_G	Two-component response regulator-like APRR2	0.0169445	0.00724042	0.035587	0.13566	0.65266	0.787506	0.963148
HORVU0Hr1G007780	LC_u	undescribed protein	0	0	0	0.134184	0.0512092	0	0.156245
HORVU0Hr1G007790	HC_u	undescribed protein	0.579006	0.317203	0.277512	0.0643988	0.410481	0.440694	0.486474
HORVU0Hr1G007800	x	x	6.93375	2.8199	8.92786	9.02342	5.59804	3.75355	2.52933
HORVU0Hr1G007810	LC_TE	Retrotransposon protein; putative; Ty3-gypsy subclass	0	0	0	0	0	0	0.063691
HORVU0Hr1G007820	HC_G	SKP1-like 4	0.902921	3.47908	3.58966	2.41388	2.55443	2.17075	1.2629
HORVU0Hr1G007830	HC_G	50S ribosomal protein L14	0	0	0	0.217962	0	0	0
HORVU0Hr1G007840	LC_u	undescribed protein	0.179455	1.07284	1.03718	0.44362	0	0.209902	0
HORVU0Hr1G007850	LC_u	undescribed protein	0	0	0	0	0.0372712	0	0
HORVU0Hr1G007860	HC_TE?	ATP-dependent RNA helicase; putative	15.3763	27.4527	73.022	61.941	31.0226	26.4357	27.0525
HORVU0Hr1G007870	HC_G	Aspartic proteinase nepenthesin-1	0	0	0	0	0	0	0
HORVU0Hr1G007880	HC_G	Pentatricopeptide repeat-containing protein	0.944957	2.10736	1.01353	2.69112	0.922033	0.735522	0.831749
HORVU0Hr1G007890	HC_G	Cyclin family protein	0.319732	0.126772	0	0.0964413	1.13865	0.298864	1.02386
HORVU0Hr1G007900	LC_u	undescribed protein	0	0	0	0	0	0	0
HORVU0Hr1G007910	LC_u	undescribed protein	0.529242	0	0	0	0	0	0
HORVU0Hr1G007920	LC_u	undescribed protein	0	0	0	0	0	0	0
HORVU0Hr1G007930	HC_G	DNA binding protein	103.634	56.2505	52.511	50.8697	41.0097	50.5063	52.9228
HORVU0Hr1G007940	LC_u	undescribed protein	0	0	0	0	0	0.15995	0
HORVU0Hr1G007950	LC_u	undescribed protein	0	0	0	0	0	0	0
HORVU0Hr1G007960	HC_G	zinc induced facilitator-like 1	0	0.0261675	0.0626475	0.0767368	0.0326888	0	0.104449
HORVU0Hr1G007970	LC_TE	undescribed protein	0	0	0	0	0	0	0
HORVU0Hr1G007980	LC_u	undescribed protein	0	0	0.198929	0.216995	0.16174	0	0
HORVU0Hr1G007990	LC_TE	Retrotransposon protein; putative; unclassified	0	0	0	0.237465	0	0	0
HORVU0Hr1G008000	LC_TE	Retrotransposon protein; putative; unclassified	0	0	0.110578	0	0	0	0
HORVU0Hr1G008010	LC_TE	Retrotransposon protein; putative; unclassified	0	0.043338	0.270685	0.0600555	0.130293	0.042634	0.042086
HORVU0Hr1G008020	LC_M	undescribed protein	0	0	0	0	0	0	0
HORVU0Hr1G008030	HC_TE?	ATP-dependent DNA helicase Q1	2.47788	2.26531	5.13518	13.919	12.8135	10.7106	10.2078
HORVU0Hr1G008040	HC_G	40S ribosomal protein S20	0	0	0	0	0	0	0
HORVU0Hr1G008050	HC_U	unknown function	0.267423	1.09389	0.587333	0.987383	2.98747	2.15002	2.13866
HORVU0Hr1G008060	HC_G	RNA-binding protein Nova-1	19.2266	20.7104	27.5032	35.1823	23.4275	14.9804	14.4879
HORVU0Hr1G008070	HC_G	RNA-binding protein Nova-1	0.495212	1.9746	2.7966	1.84195	1.86675	1.16993	0.400243
HORVU0Hr1G008080	HC_G	RNA-binding protein Nova-1	10.3506	9.04379	17.0783	17.7896	11.8989	8.26482	8.59648
HORVU0Hr1G008090	LC_U	unknown function	0	0	0	0	0	0	0
HORVU0Hr1G008100	LC_TE?	F-box/LRR-repeat protein 4	3.06497	2.35539	6.78329	12.0394	13.757	12.7136	12.0788
HORVU0Hr1G008110	LC_u	undescribed protein	0	0	0	0	0	0	0
HORVU0Hr1G008120	LC_u	undescribed protein	0.165773	0	0.545233	0.821095	1.13697	0.51944	0.338076
HORVU0Hr1G008130	LC_u	undescribed protein	0	0	0	0	0	0	0
HORVU0Hr1G008140	LC_u	undescribed protein	0	0	0	0	0	0	0
HORVU0Hr1G008150	LC_TE	Transposon Ty3-G Gag-Pol polyprotein	0	1.13613	0	1.92994	0.51467	0	0.506757
HORVU0Hr1G008160	LC_TE	unknown function	0	0.0184312	0.020345	0.0679911	0	0	0
HORVU0Hr1G008170	LC_u	undescribed protein	0	0.504422	0.182179	0.985172	1.33697	0.960623	0.148374
HORVU0Hr1G008180	LC_TE	unknown function	0.11857	0.280405	0.61822	0.596571	0.617573	0.428762	0.857756
HORVU0Hr1G008190	LC_u	undescribed protein	0	0	0	0	0	0	0
HORVU0Hr1G008200	LC_u	undescribed protein	15.8324	15.1915	5.01069	0.390649	0.685774	0.216451	1.04399
HORVU0Hr1G008210	LC_u	undescribed protein	9.76566	11.2066	7.27606	2.14319	1.16682	1.30299	2.29027
HORVU0Hr1G008220	LC_u	undescribed protein	0.398504	0.202385	0	0	0	0	0
HORVU0Hr1G008230	LC_u	undescribed protein	0	0	0	0	0	0	0
HORVU0Hr1G008240	LC_u	undescribed protein	0	0	0	0	0	0	0
HORVU0Hr1G008250	LC_TE	Retrotransposon protein; putative; Ty3-gypsy subclass	0	0	0	0	0	0	0
HORVU0Hr1G008260	LC_TE	Retrotransposon protein; putative; Ty3-gypsy subclass	0.0155435	0.110776	0.0389762	0.03987	0	0.052132	0.0304985
HORVU0Hr1G008270	LC_u	undescribed protein	0	0	0	0	0	0.12817	0.4123
HORVU0Hr1G008280	HC_G	RNA-binding protein 1	40.0485	41.4986	91.6544	104.663	92.6748	84.9014	90.9807
HORVU0Hr1G008290	LC_TE	unknown function	0	0.0081294	0.0035893	0	0	0	0
HORVU0Hr1G008300	LC_TE	Retrotransposon protein; putative; Ty3-gypsy subclass	0	0	0	0	0	0	0.25064
HORVU0Hr1G008310	LC_u	undescribed protein	0	0	0	0	0	0	0
HORVU0Hr1G008320	LC_u	undescribed protein	0	1.48257	0	2.55018	0	0	0
HORVU0Hr1G008330	LC_u	undescribed protein	0.211259	0.592883	0.441566	0.692582	0.202393	0.368592	0.383539
HORVU0Hr1G008340	LC_u	undescribed protein	0.647999	1.40974	3.44653	0.868691	0.49582	0.827086	0.986514
HORVU0Hr1G008350	HC_G	dynamin-like protein 6	0	0	0	0	0	0	0.25048
HORVU0Hr1G008360	HC_G	Thioredoxin superfamily protein	7.37918	7.98833	9.92807	4.60609	6.55006	4.96037	2.6385
HORVU0Hr1G008370	HC_G	receptor-like protein kinase 4	2.18874	3.01693	1.52346	1.07363	0.644924	1.00648	0.747476
HORVU0Hr1G008380	LC_u	undescribed protein	0	0.561983	0	0	1.12378	0.66074	0
HORVU0Hr1G008390	HC_G	Aquaporin PIP1-1	0	0	0	0	0	0	0
HORVU0Hr1G008400	HC_G	Nucleotide-sugar transporter family protein	0.280904	0.862972	0.812423	1.53156	0.777511	1.44863	1.74706
HORVU0Hr1G008410	LC_TE	Transposon Ty1-BR Gag-Pol polyprotein	0	0	0	0	0	0	0
HORVU0Hr1G008420	LC_TE	Retrotransposon protein; putative; Ty1-copia subclass	0	0	0	0	0	0	0
HORVU0Hr1G008430	LC_u	undescribed protein	7.00656	4.03532	11.945	8.36626	1.39545	7.05804	10.2161
HORVU0Hr1G008440	LC_u	undescribed protein	0	0	0	0	0	0	0
HORVU0Hr1G008450	LC_u	undescribed protein	0	0	0	0	0	0	0
HORVU0Hr1G008460	LC_u	undescribed protein	0	0	0	0	0	0	0
HORVU0Hr1G008470	HC_G	SEC12-like protein 2	12.6464	12.5768	42.2245	62.5091	40.0102	36.7294	37.3678
HORVU0Hr1G008480	LC_u	undescribed protein	0	0	0	0	0	0	0
HORVU0Hr1G008490	LC_U	Chromosome 3B; genomic scaffold; cultivar Chinese Spring	0	0	0	0	0	0	0
HORVU0Hr1G008500	LC_TE	unknown function	0	0	0	0	0	0	0
HORVU0Hr1G008510	LC_U	unknown function	0	0	0	0	0	0	0
HORVU0Hr1G008520	LC_u	undescribed protein	0	0	0	0	0	0	0
HORVU0Hr1G008530	LC_u	undescribed protein	0	0	0	0	0.0793365	0.461446	0.750795
HORVU0Hr1G008540	LC_u	undescribed protein	0	0	0	0	0	0	0
HORVU0Hr1G008550	HC_G	ABC transporter ATP-binding protein uup	19.6166	21.6345	31.1187	26.3576	12.8138	13.8369	21.0917
HORVU0Hr1G008560	LC_u	undescribed protein	0	0	0	0	0	0	0
HORVU0Hr1G008570	LC_u	undescribed protein	0	0.0870062	0	0	0	0	0
HORVU0Hr1G008580	HC_G	Disease resistance protein	0.334745	2.69819	11.9837	6.6929	3.60965	2.67613	3.72294
HORVU0Hr1G008590	HC_G	Cyclin-B1-5	3.3378	2.99363	4.4211	3.8431	4.95656	6.29078	5.74972
HORVU0Hr1G008600	LC_u	undescribed protein	0	0	0	0	0	0	0
HORVU0Hr1G008610	HC_G	CBS domain-containing protein; putative; expressed	0	0.101516	0.113121	0	0.451832	0.186438	0.267592
HORVU0Hr1G008620	HC_TE?	inositol polyphosphate 5-phosphatase I	4.00748	4.55905	13.4126	17.5981	17.3197	18.6343	20.6413
HORVU0Hr1G008630	LC_u	undescribed protein	0	0	0	0	0	0	0
HORVU0Hr1G008640	HC_G	Tryptophan/tyrosine permease	19.3326	12.4297	6.89424	6.2905	3.42464	3.46118	4.26087
HORVU0Hr1G008650	HC_G	patatin-like protein 6	1.20097	4.5345	3.05801	0.283465	0.834071	0.888881	0.473274
HORVU0Hr1G008660	LC_u	undescribed protein	0	0.244935	0.35072	0	0.110612	0	0
HORVU0Hr1G008670	HC_G	PATATIN-like protein 6	0.614575	3.41702	3.48542	0.237783	1.13349	0.770676	0.623451
HORVU0Hr1G008680	LC_u	undescribed protein	0	0.211092	0.112595	0.257649	0.0141442	0.0784587	0
HORVU0Hr1G008690	HC_G	TOPLESS-related 1	40.2755	38.2844	95.3045	143.791	108.201	94.8767	106.468
HORVU0Hr1G008700	HC_G	RING/U-box superfamily protein	101.924	111.288	101.476	75.0105	47.209	59.7082	66.3849
HORVU0Hr1G008710	LC_u	undescribed protein	0	0	0	0	0	0	0
HORVU0Hr1G008720	LC_u	undescribed protein	0	0.335735	0	0	0	0	0
HORVU0Hr1G008730	LC_TE	General transcription factor 2-related zinc finger protein	0	0	0	0	0	0	0
HORVU0Hr1G008740	HC_G	Chorismate synthase	76.1091	68.1252	81.0056	115.048	136.603	129.965	125.72
HORVU0Hr1G008750	HC_G	Cytochrome c oxidase subunit 5b-2; mitochondrial	0	0	1.25801	1.17745	1.87485	1.94834	3.66133
HORVU0Hr1G008760	LC_TE?	FAR1-related sequence 5	0	0	0	0	0	0	0
HORVU0Hr1G008770	LC_TE?	FAR1-related sequence 6	4.94334	9.30252	11.0796	14.2455	8.02149	7.24572	8.78083
HORVU0Hr1G008780	HC_G	beta-galactosidase 8	21.4559	31.0226	20.0169	16.6804	34.7988	37.7473	45.2697
HORVU0Hr1G008790	HC_G	Protein CHAPERONE-LIKE PROTEIN OF POR1; chloroplastic	12.1323	9.03314	30.3511	32.865	29.2317	33.7709	61.3851
HORVU0Hr1G008800	HC_G	Cytochrome c oxidase subunit 5b-2; mitochondrial	35.9132	42.2117	72.3434	130.241	212.659	261.843	224.3
HORVU0Hr1G008810	HC_G	mRNA capping enzyme; C-terminal domain containing protein; expressed	99.4972	63.6551	91.4171	112.218	59.6871	46.9635	52.694
HORVU0Hr1G008820	LC_U	unknown function	0	0	0	0	0	0	0
HORVU0Hr1G008830	HC_G	MLO-like protein 1	0.00978333	0.0290151	0.493116	2.7882	9.54809	6.63759	5.18663
HORVU0Hr1G008840	HC_G	Solute carrier family 12 member 7	0	0	0	0	0	0	0
HORVU0Hr1G008850	HC_G	ACT domain repeat 8	8.7355	13.1368	5.09892	1.62707	1.33082	1.47657	0.750792
HORVU0Hr1G008860	HC_G	Autophagy-related protein 9	16.6725	34.3379	65.8055	39.7705	15.2623	13.292	13.8249
HORVU0Hr1G008870	HC_G	alcohol dehydrogenase 1	47.2363	70.6249	98.9676	25.0577	6.92009	4.59637	7.63249
HORVU0Hr1G008880	HC_G	Partner of Y14 and mago	34.7425	35.349	77.6998	90.161	50.9226	40.6864	40.6223
HORVU0Hr1G008890	x	x	53.4984	40.3014	49.8246	62.5754	15.9421	15.115	12.4713
HORVU0Hr1G008900	LC_u	undescribed protein	0	0	0	0	0	0	0
HORVU0Hr1G008910	LC_u	undescribed protein	0	0	0	0	0	0	0
HORVU0Hr1G008920	HC_u	undescribed protein	2.66894	5.70613	11.4839	3.06516	4.56381	3.15314	2.68128
HORVU0Hr1G008930	LC_u	undescribed protein	0	0	0	0	0	0	0
HORVU0Hr1G008940	HC_G	heat shock factor 3	6.60239	116.464	70.4313	29.1045	9.79487	8.65083	8.67792
HORVU0Hr1G008950	HC_G	Branched-chain-amino-acid aminotransferase 6	4.31426	4.25712	3.50192	7.60058	18.3229	18.9914	20.9244
HORVU0Hr1G008960	HC_G	Early light-induced protein 1; chloroplastic	28.9103	16.2462	2.27075	0.27662	0.0474039	0.0802646	0.0406734
HORVU0Hr1G008970	HC_G	Mitochondrial processing peptidase beta subunit family protein	101.909	64.1881	103.456	151.445	138.263	101.422	139.261
HORVU0Hr1G008980	HC_G	Mitochondrial-processing peptidase subunit beta	0	0	0	0	7.77	0.753	1.66e-09
HORVU0Hr1G008990	HC_G	pentatricopeptide repeat 336	1.4598	2.00995	7.69817	9.71849	3.5514	2.54154	2.27417
HORVU0Hr1G009000	LC_u	undescribed protein	0	0	0	0	0	0	0
HORVU0Hr1G009010	LC_M	unknown function	0	0.0453312	0	0	0	0.038162	0
HORVU0Hr1G009020	LC_u	undescribed protein	0	0	0	0	0	0	0
HORVU0Hr1G009030	HC_G	Mitochondrial import inner membrane translocase subunit TIM22-2	98.1159	90.6979	74.7832	39.1314	29.256	25.1655	30.7134
HORVU0Hr1G009040	HC_G	Mitochondrial import inner membrane translocase subunit TIM22-2	352.899	279.664	237.016	139.854	89.2357	83.5896	108.095
HORVU0Hr1G009050	HC_G	amine oxidase 1	0.0151355	0.0183095	0.0378565	0.101623	0.574329	3.23674	3.67843
HORVU0Hr1G009060	HC_G	alpha/beta-Hydrolases superfamily protein	2.59458	2.38979	1.21952	0.83008	3.07367	3.12101	2.45221
HORVU0Hr1G009070	HC_G	Pyridoxal phosphate (PLP)-dependent transferases superfamily protein	4.6069	6.5194	7.21762	8.9011	1.30784	1.55285	0.876602
HORVU0Hr1G009080	HC_G	Copper-transporting ATPase 2	15.8504	14.3183	9.83594	5.43035	3.52021	4.75486	6.4823
HORVU0Hr1G009090	LC_TE	undescribed protein	0	0	0	0	0	0	0
HORVU0Hr1G009100	HC_G	alpha/beta-Hydrolases superfamily protein	0.660409	1.46536	0.676601	0.045785	0.116307	0.0403112	0.047457
HORVU0Hr1G009110	LC_TE?	Ribosomal protein-like	0.0402402	0.0813041	0.117505	0.0360835	0.0129371	0	0.0121633
HORVU0Hr1G009120	HC_G	Hydrolase; alpha/beta fold family protein; expressed	0	0.0160644	0.0726516	0.425948	2.25113	7.87444	15.6882
HORVU0Hr1G009130	LC_u	undescribed protein	0	0.454362	0.253912	0	0	0.214237	0
HORVU0Hr1G009140	HC_G	YGGT family protein	3.67789	2.33191	1.05853	0.590626	4.11109	9.49944	18.6881
HORVU0Hr1G009150	HC_G	alpha/beta-Hydrolases superfamily protein	3.17878	4.75207	1.27502	0.484218	0.253171	0.503066	0.665023
HORVU0Hr1G009160	LC_u	undescribed protein	0	0	0	0	0	0	0
HORVU0Hr1G009170	HC_u	undescribed protein	63.6399	92.3094	120.715	102.805	60.7694	36.2842	37.3554
HORVU0Hr1G009180	HC_U	unknown function	0	0	0.0322047	0	0	0	0
HORVU0Hr1G009190	LC_TE	Retrotransposon protein; putative; unclassified	0	0	0	0.0481543	0	0.0751605	0
HORVU0Hr1G009200	LC_TE	Retrotransposon protein; putative; unclassified	0	0	0	0	0	0	0
HORVU0Hr1G009210	LC_TE	Retrotransposon protein; putative; unclassified	0	0	0	0	0	0	0
HORVU0Hr1G009220	LC_U	unknown function	0	0	0	0	0	0	0
HORVU0Hr1G009230	HC_G	flavin-dependent monooxygenase 1	0	0	0	0	0.0257799	0	0.00897535
HORVU0Hr1G009240	LC_u	undescribed protein	0	0	0	0	0	0	0
HORVU0Hr1G009250	HC_G	undescribed protein	0	0	0	0	0	0	0
HORVU0Hr1G009260	LC_u	undescribed protein	0	0	0	0	0	0	0
HORVU0Hr1G009270	HC_u	undescribed protein	0	0	0	0	0	0	0.168085
HORVU0Hr1G009280	HC_G	unknown protein; BEST Arabidopsis thaliana protein match is: unknown protein .	1.04297	2.94222	8.0626	3.33264	5.51382	4.67245	7.00034
HORVU0Hr1G009290	LC_u	undescribed protein	7.76549	9.84594	35.8515	24.0733	21.0257	18.3762	14.7358
HORVU0Hr1G009300	LC_u	undescribed protein	0	0	0	0	0	0	0
HORVU0Hr1G009310	HC_G	Leucine-rich receptor-like protein kinase family protein	0	0	0	0	0	0.0455184	0.0642557
HORVU0Hr1G009320	HC_G	Pollen allergen Lol p 3	0	0	0	0	0	0	0
HORVU0Hr1G009330	HC_G	methionine S-methyltransferase	0	0	0	0	0	0	0
HORVU0Hr1G009340	HC_G	Pollen allergen Lol p 3	0	0	0	0	0	0	0
HORVU0Hr1G009350	HC_G	Pollen allergen Lol p 3	0	0	0	0	0	0	0
HORVU0Hr1G009360	LC_u	undescribed protein	0	0	0	0	0	0	0
HORVU0Hr1G009370	HC_G	unknown protein; BEST Arabidopsis thaliana protein match is: unknown protein .	0.147674	0.30354	0.529575	0.836189	0.78827	1.06689	2.00475
HORVU0Hr1G009380	HC_U	Plant protein of unknown function (DUF863)	7.19633	9.48858	24.1999	20.6071	12.0964	11.5	12.6517
HORVU0Hr1G009390	HC_G	germin-like protein 2	8.0307e-05	0.431034	0.017742	0.0160376	0.544825	0.0100914	0.00511573
HORVU0Hr1G009400	HC_G	germin-like protein 9	1.02	1.36	0.969	1.19	0.409	0.42	2.02e-06
HORVU0Hr1G009410	HC_G	germin-like protein 2	0	0	0.0300893	0.070452	1.08534	3.1755	1.43458
HORVU0Hr1G009420	HC_G	germin-like protein 9	0	0	0	0.00181046	0	0	0.114211
HORVU0Hr1G009430	x	x	0.486364	2.53276	2.37271	2.05056	3.35888	2.93085	0.827214
HORVU0Hr1G009440	HC_G	germin-like protein 2	0	0	0	0	0	0	0.086028
HORVU0Hr1G009450	HC_G	germin-like protein 2	0	0	0.273	2.42e-08	0	0	0.269
HORVU0Hr1G009460	HC_G	germin-like protein 9	0	0	0	0	0.64954	1.70731	0.921349
HORVU0Hr1G009470	HC_G	germin-like protein 2	0.048823	0.06975	0.166475	0.0922392	0.101268	0.605357	0.525819
HORVU0Hr1G009480	HC_G	phospholipase D P1	0	0.0236226	0.0188896	0.0102589	0.0188848	0.039698	0.0458625
HORVU0Hr1G009490	LC_u	undescribed protein	0	0	0	0	0	0	0
HORVU0Hr1G009500	LC_TE	Transposon protein; putative; Mutator sub-class	0	0	0	0	0	0	0
HORVU0Hr1G009510	LC_u	undescribed protein	0.281394	0.0991912	0.439642	0.474676	0.679853	0.364864	0.360708
HORVU0Hr1G009520	LC_u	undescribed protein	0	0	0	0	0	0	0
HORVU0Hr1G009530	HC_G	unknown function	0.856428	1.83913	3.18718	0.822662	1.82125	1.30348	0.619954
HORVU0Hr1G009540	HC_u	undescribed protein	0	0	0	0	0	0	0
HORVU0Hr1G009550	HC_G	PPPDE putative thiol peptidase family protein	8.95058	13.8699	25.7784	16.9054	6.71453	8.70026	11.5054
HORVU0Hr1G009560	HC_G	H(+)-ATPase 11	8.13794	6.62773	6.17023	5.73669	4.00925	3.36482	3.75743
HORVU0Hr1G009570	LC_u	undescribed protein	0	0	0	0	0	0	0
HORVU0Hr1G009580	LC_u	undescribed protein	5.39183	7.11559	7.8851	5.86374	4.29146	4.22963	3.12054
HORVU0Hr1G009590	LC_u	undescribed protein	0.1283	0.48995	0.10533	0.218972	0.0467175	0.175243	0.166816
HORVU0Hr1G009600	HC_u	undescribed protein	0.306378	0.81705	0.186917	0	1.28572	0.144744	0.714418
HORVU0Hr1G009610	x	x	1.76895	1.33672	1.55619	1.18556	0.513784	0.414793	0.0760365
HORVU0Hr1G009620	LC_u	undescribed protein	0	0	0	0	0	0	0
HORVU0Hr1G009630	LC_TE	hAT transposon superfamily protein	0	0	0	0	0	0	0
HORVU0Hr1G009640	LC_u	undescribed protein	5.87353	5.49433	7.66758	8.60655	4.17084	4.53938	1.73858
HORVU0Hr1G009650	LC_u	undescribed protein	0	0	0	0	0	0	0
HORVU0Hr1G009660	LC_u	undescribed protein	0	0	0	0.2385	0	0	0
HORVU0Hr1G009670	LC_u	undescribed protein	0	0	0	0	0	0	0
HORVU0Hr1G009680	HC_G	PG1 protein; homology to Homo sapiens	10.0475	2.1255	1.12892	0.545007	0.736358	0.165234	0
HORVU0Hr1G009690	LC_TE	Transposon protein; putative; CACTA; En/Spm sub-class	0	0.180794	0.0637873	0	0.113192	0.0765341	0.0558087
HORVU0Hr1G009700	LC_u	undescribed protein	0	0.25069	0.435256	0.554263	0.211567	0	0.406991
HORVU0Hr1G009710	LC_u	undescribed protein	0	0	0	0	0	0	0
HORVU0Hr1G009720	LC_u	undescribed protein	0	0	0.182558	0	0	0	0
HORVU0Hr1G009730	LC_u	undescribed protein	0	0	0	0	0	0	0
HORVU0Hr1G009740	HC_G	fatty acid hydroxylase 1	9.58897	18.4262	56.6133	73.3638	86.0154	112.32	157.182
HORVU0Hr1G009750	LC_TE	HAT family dimerisation domain containing protein	0	0.135057	0	0	0	0	0
HORVU0Hr1G009760	x	x	0	0	0	0	0	0	0
HORVU0Hr1G009770	HC_G	ATP synthase subunit alpha; chloroplastic	0.156385	0	0	0	0	0	0
HORVU0Hr1G009780	HC_U	unknown function	2.05964	2.13117	0.267471	0.820586	0.788744	0.198772	0.153443
HORVU0Hr1G009790	LC_TE	hAT dimerisation domain-containing protein / transposase-related	0	0	0	0	0	0	0
HORVU0Hr1G009800	HC_TE?	Zinc finger MYM-type protein 5	0.0785763	0.0424788	0	0	0	0	0
HORVU0Hr1G009810	LC_TE	unknown function	0	0	0	0	0	0	0
HORVU0Hr1G009820	LC_TE	Retrotransposon protein; putative; unclassified	0	0.116779	0.270916	0.143803	0	0	0
HORVU0Hr1G009830	LC_TE	Retrotransposon protein; putative; unclassified	0	0	0	0	0	0	0
HORVU0Hr1G009840	HC_G	Splicing factor 3B subunit 1	0.884838	0.179785	0.134646	0.162927	0.0890421	0.0899584	0.0148022
HORVU0Hr1G009850	HC_G	PLC-like phosphodiesterases superfamily protein	0	0.481	0.198	8.34e-06	0.959	0	0.186
HORVU0Hr1G009860	HC_G	PI-PLC X domain-containing protein	0.0673239	0.0326403	0.0239887	0.132796	0.237695	0.41438	0.629955
HORVU0Hr1G009870	HC_G	Nucleolar complex protein 2 homolog	2.39742	4.71744	7.62955	5.33777	14.4794	5.74953	3.03301
HORVU0Hr1G009880	HC_G	Glycosyltransferase family 61 protein	0	0.0517607	0	0	0	0	0.00959153
HORVU0Hr1G009890	LC_TE	unknown function	0	0	0	0	0	0	0
HORVU0Hr1G009900	HC_G	cation calcium exchanger 4	2.56e-10	0	0	0	0	0	0
HORVU0Hr1G009910	HC_G	Pyruvate dehydrogenase E1 component subunit beta	13.2561	11.4733	8.51704	8.84605	8.15267	8.45534	15.5727
HORVU0Hr1G009920	LC_TE?	Beta-fructofuranosidase; soluble isoenzyme I	0	0	0	0	0	0	0
HORVU0Hr1G009930	HC_G	Pentatricopeptide repeat-containing protein	0.180805	0.353111	0.5161	0.515543	0.207868	0.295476	0.380737
HORVU0Hr1G009940	x	x	0	0	0	0	0	0	0
HORVU0Hr1G009950	LC_u	undescribed protein	0	0	0	0	0	0	0
HORVU0Hr1G009960	HC_TE?	F-box family protein	0.237723	0.559222	0.278748	0.161755	0	0.130397	0.0561857
HORVU0Hr1G009970	HC_G	Ubiquinol oxidase	0	0	0	0	0	0	0
HORVU0Hr1G009980	LC_TE	Retrotransposon protein; putative; unclassified	0	0	0	0	0.0333532	0	0
HORVU0Hr1G009990	LC_u	undescribed protein	0	0	0	0	0	0	0
HORVU0Hr1G010000	HC_G	Core-2/I-branching beta-1;6-N-acetylglucosaminyltransferase family protein	18.5842	8.74061	3.53264	3.32765	6.15104	6.62619	8.35016
HORVU0Hr1G010010	HC_u	undescribed protein	0	0	0	0	0	0	0
HORVU0Hr1G010020	HC_G	Ubiquitin carboxyl-terminal hydrolase family protein	0.874118	1.18256	2.03331	1.5435	1.04847	1.38611	1.82634
HORVU0Hr1G010030	LC_u	undescribed protein	0	0	0	0	0	0	0
HORVU0Hr1G010040	HC_G	Glucan endo-1;3-beta-glucosidase 8	0.00927098	0.0098896	0.109891	0.276177	3.48879	6.24861	6.17929
HORVU0Hr1G010050	HC_U	unknown function	0	0	0	0	0	0	0
HORVU0Hr1G010060	LC_TE	unknown function	3.95166	3.27404	6.86235	7.50099	3.9579	3.7498	3.35632
HORVU0Hr1G010070	HC_G	Peroxidase superfamily protein	0	0	0	0	0.255856	2.23468	2.48322
HORVU0Hr1G010080	HC_G	Bidirectional sugar transporter N3	0	0	0.0705525	0.0263027	3.22793	26.451	42.5589
HORVU0Hr1G010090	LC_u	undescribed protein	0.561048	1.82094	0	0	0	0	0
HORVU0Hr1G010100	LC_u	undescribed protein	0	0	0	0	0	0	0
HORVU0Hr1G010110	LC_u	undescribed protein	0	0	0	0	0	0	0
HORVU0Hr1G010120	HC_G	BTB/POZ domain-containing protein	0	0	0	0	0.0297735	0	0
HORVU0Hr1G010130	LC_u	undescribed protein	0	0	0	0	0	0	0
HORVU0Hr1G010140	LC_U	Chromosome 3B; genomic scaffold; cultivar Chinese Spring	0	0	0.180512	0	0	0	0
HORVU0Hr1G010150	LC_u	undescribed protein	0	0	0	0	0	0	0
HORVU0Hr1G010160	HC_G	Homeobox-leucine zipper protein ATHB-9	0.0583388	0.540232	1.25291	1.24179	2.75622	1.56399	1.15699
HORVU0Hr1G010170	HC_G	30S ribosomal protein S17	0	0	0	0	0	0	0
HORVU0Hr1G010180	HC_U	unknown function	0	0	0	0	0	0	0
HORVU0Hr1G010190	HC_G	Glutaredoxin family protein	0	0	0	0	0	0.0471102	0
HORVU0Hr1G010200	HC_G	Heavy metal transport/detoxification superfamily protein; putative	0	0.0334565	0	0	4.24431	6.96521	0.425675
HORVU0Hr1G010210	HC_G	cationic amino acid transporter 5	0	0	0	0	0	0	0.0059693
HORVU0Hr1G010220	HC_G	alcohol dehydrogenase 1	0.03527	0.145206	0.040316	0	0	0	0.0401055
HORVU0Hr1G010230	HC_G	Nuclear transcription factor Y subunit A-7	18.9281	16.5674	11.8462	12.0128	4.44139	5.93261	8.48971
HORVU0Hr1G010240	HC_TE?	Chromosome 3B; genomic scaffold; cultivar Chinese Spring	0.617642	1.026	0.943307	0.776294	0.285212	0.240811	0
HORVU0Hr1G010250	HC_G	Homeobox-leucine zipper protein HOX32	0.921116	0.524244	0.446502	0.579055	0.18847	0.36983	0.31046
HORVU0Hr1G010260	HC_G	unknown function	24.5689	21.3422	21.7214	25.4968	20.1009	17.1985	20.2897
HORVU0Hr1G010270	LC_U	unknown function	0	0	0	0	0	0	0
HORVU0Hr1G010280	HC_G	Cullin-associated NEDD8-dissociated protein 1	3.30241	6.28921	10.2916	13.2184	14.3321	12.8462	15.0087
HORVU0Hr1G010290	LC_u	undescribed protein	0	0	0	0	0	0	0
HORVU0Hr1G010300	LC_TE	Retrotransposon protein; putative; unclassified	0	0	0	0	0	0	0
HORVU0Hr1G010310	HC_TE?	unknown function	0	0	0	0	0.0403876	0	0
HORVU0Hr1G010320	LC_U	unknown function	0	0	0	0	0.0824022	0	0
HORVU0Hr1G010330	HC_G	NAC domain-containing protein 68	0	0	0	0	0	0	0
HORVU0Hr1G010340	HC_u	undescribed protein	3.24538	9.76601	51.4663	25.2437	5.20914	5.20857	3.73948
HORVU0Hr1G010350	HC_G	FAR1-related sequence 7	0.0236182	0.0217517	0	0.135453	0.635146	0.63407	0.683401
HORVU0Hr1G010360	HC_TE?	Zinc finger CCCH domain-containing protein 62	1.78634	1.07448	2.17988	2.36659	3.74418	4.53956	4.69505
HORVU0Hr1G010370	HC_G	Ethylene-responsive transcription factor 5	0	0	0	0	0	0	0
HORVU0Hr1G010380	LC_u	undescribed protein	0	0.0674432	0.125924	0.182738	0	0.0856545	0.0342952
HORVU0Hr1G010390	HC_G	unknown function	0	0	0.0151461	0	0.0772831	0.0280355	0.0132517
HORVU0Hr1G010400	HC_u	undescribed protein	0	0	0	0	0	0	0
HORVU0Hr1G010410	HC_U	Chromosome 3B; genomic scaffold; cultivar Chinese Spring	0.69811	0.893524	1.08633	0.801329	0.494666	0.378997	0.699468
HORVU0Hr1G010420	LC_u	undescribed protein	0.0770355	2.16984	0.945314	0.316182	0	0	0
HORVU0Hr1G010430	LC_u	undescribed protein	0	0.42117	0.481963	0.534702	0	0	0
HORVU0Hr1G010440	HC_G	LRR receptor-like serine/threonine-protein kinase EFR	0	0	0	0	0	0	0
HORVU0Hr1G010450	LC_U	unknown function	0	0	0	0	0	0	0
HORVU0Hr1G010460	HC_G	MATE efflux family protein	0	0	0	0.129461	0.105303	0.394365	0.103838
HORVU0Hr1G010470	HC_u	undescribed protein	0	0	0	0	0	0	9.81e-05
HORVU0Hr1G010480	HC_u	undescribed protein	0	0	0	0	0	0	0.019576
HORVU0Hr1G010490	HC_G	Oxysterol-binding protein-related protein 1A	3.94936	5.75073	11.2594	14.2685	18.0033	11.0766	11.5076
HORVU0Hr1G010500	LC_U	unknown function	0.526838	1.34892	4.52597	2.81774	1.10068	0.669884	1.08121
HORVU0Hr1G010510	HC_G	Myosin-J heavy chain	0	0.181736	0	0	0	0	0
HORVU0Hr1G010520	LC_u	undescribed protein	0.0679995	0.134022	0.710564	1.10962	0.608672	0.543175	0.564878
HORVU0Hr1G010530	HC_G	Oxysterol-binding protein-related protein 1D	5.70287	5.82264	10.8339	22.0031	15.4622	13.7195	14.4934
HORVU0Hr1G010540	LC_u	undescribed protein	0	1.92232	3.58926	2.0333	1.20251	2.83344	1.77655
HORVU0Hr1G010550	LC_TE	Gag-pol polyprotein	0.101678	0.426878	0.814168	1.05952	0.903667	0.549108	0.382584
HORVU0Hr1G010560	LC_TE	unknown function	0	0	0	0	0	0	0
HORVU0Hr1G010570	LC_TE	unknown function	0	0	0	0	0	0	0
HORVU0Hr1G010580	LC_u	undescribed protein	0	0.0779243	0	0	0.760305	0.838147	0.369124
HORVU0Hr1G010590	HC_G	Regulation of nuclear pre-mRNA domain-containing protein 1B	11.3094	12.0948	29.285	39.0065	14.85	10.4776	9.67636
HORVU0Hr1G010600	HC_G	Calcium-dependent protein kinase 5	0	0.628435	1.43829	0.84601	0	0	0
HORVU0Hr1G010610	LC_u	undescribed protein	0	0	0	0	0	0	0
HORVU0Hr1G010620	LC_u	undescribed protein	0	0	0	0	0	0	0
HORVU0Hr1G010630	HC_G	Oxysterol-binding protein-related protein 1D	24.8517	18.1483	23.9116	46.7338	36.8645	25.796	28.0584
HORVU0Hr1G010640	HC_G	Late embryogenesis abundant (LEA) hydroxyproline-rich glycoprotein family	0.115846	1.83908	1.41547	0.288763	1.77461	1.20666	0.69701
HORVU0Hr1G010650	LC_u	undescribed protein	0	0	0	0	0	0	0
HORVU0Hr1G010660	HC_G	Non-structural maintenance of chromosomes element 1 homolog	7.3235	4.64633	6.26488	13.536	10.2535	9.00784	9.28902
HORVU0Hr1G010670	LC_u	undescribed protein	0	0	0	0	0	0	0
HORVU0Hr1G010680	HC_G	Cytochrome c oxidase subunit 1	0.402569	0.203588	0.0780902	0	0	0	0.0276748
HORVU0Hr1G010690	HC_G	Cytochrome c biogenesis FC	1.33784	0.825331	0.14616	0.105269	0.149429	0.0873842	0.136527
HORVU0Hr1G010700	HC_G	CcmFC	0.141641	0.042371	0	0	0	0	0
HORVU0Hr1G010710	HC_G	Chaperone protein dnaJ 10	0	1.06177	0	0	0	0	0
HORVU0Hr1G010720	LC_TE	Retrotransposon protein; putative; unclassified	0	0	0	0	0	0	0
HORVU0Hr1G010730	LC_TE	Retrotransposon protein; putative; unclassified	0	0	0	0	0	0	0
HORVU0Hr1G010740	LC_TE	Transposon protein; putative; Mutator sub-class	4.64431	9.1835	10.3633	6.99864	3.48984	3.20031	3.8328
HORVU0Hr1G010750	HC_G	UV radiation resistance-associated gene protein	8.11512	8.52499	11.9593	11.6644	10.3297	9.61003	9.88937
HORVU0Hr1G010760	HC_U	unknown function	2.07164	1.56391	2.86384	6.60408	7.99665	8.15232	10.4044
HORVU0Hr1G010770	HC_u	undescribed protein	5.56884	4.45095	1.28023	0.332469	0.551591	0.757815	0.421802
HORVU0Hr1G010780	LC_u	undescribed protein	0.336696	0.0572652	0	0	0	0	0
HORVU0Hr1G010790	HC_U	unknown protein; Has 44 Blast hits to 44 proteins in 16 species: Archae - 0; Bacteria - 0; Metazoa - 0; Fungi - 0; Plants - 44; Viruses - 0; Other Eukaryotes - 0 (source: NCBI BLink).	169.414	160.037	164.36	212.151	194.751	207.149	157.225
HORVU0Hr1G010800	HC_G	Peroxisomal membrane 22 kDa (Mpv17/PMP22) family protein	21.2553	17.1715	18.3828	32.4826	29.8222	36.885	64.2025
HORVU0Hr1G010810	HC_G	VQ motif family protein; expressed	0.276549	1.0996	1.28457	0.404244	0.6634	0.277102	0.30592
HORVU0Hr1G010820	LC_TE	unknown function	0	0	0.0494197	0.0584402	0	0	0
HORVU0Hr1G010830	LC_u	undescribed protein	0	0	0	0.867977	0	0	0
HORVU0Hr1G010840	HC_G	D-isomer specific 2-hydroxyacid dehydrogenase family protein	4.04234	5.27778	9.33666	7.61635	4.1306	4.67577	6.12416
HORVU0Hr1G010850	LC_u	undescribed protein	0.462031	1.76871	1.28394	0.773769	0.725043	0.186864	0.932771
HORVU0Hr1G010860	LC_u	undescribed protein	0	0.0720588	0	0	0.0330695	0	0
HORVU0Hr1G010870	HC_G	Nucleotide-sugar transporter family protein	22.6842	26.0333	76.452	106.127	80.6087	75.8662	72.8579
HORVU0Hr1G010880	HC_G	Cytochrome P450 superfamily protein	0	0	0	0	0.0135209	0.0850623	0.106847
HORVU0Hr1G010890	HC_G	Coatomer; alpha subunit	31.4363	28.2146	73.73	60.1156	49.674	39.3979	34.4808
HORVU0Hr1G010900	HC_u	undescribed protein	0.296	16.1	2.71	35.7	16.1	0.131	2.15e-05
HORVU0Hr1G010910	HC_G	NifU-like protein 4; mitochondrial	0.111088	0.29359	0.121425	0	0.349372	0.202109	0.0995282
HORVU0Hr1G010920	HC_G	Transmembrane 9 superfamily member 1	2.31e-06	0	0	0.225	0.538	0.187	0.297
HORVU0Hr1G010930	LC_u	undescribed protein	0	0	0	0	0	0	0
HORVU0Hr1G010940	HC_G	Two-component response regulator-like APRR2	0.0169445	0.00724042	0.035587	0.13566	0.65266	0.787506	0.963148
HORVU0Hr1G010950	LC_u	undescribed protein	0.0400908	0.0385065	0.0489388	0	0.043403	0	0
HORVU0Hr1G010960	LC_u	undescribed protein	22.0352	12.4525	1.33704	2.37523	0.619417	0	3.71419
HORVU0Hr1G010970	HC_G	ARM repeat superfamily protein	0.616132	8.36034	16.1288	29.485	41.5253	31.1977	34.9049
HORVU0Hr1G010980	LC_TE	unknown function	0	0	0	0	0	0	0
HORVU0Hr1G010990	HC_G	Long-chain-fatty-acid--CoA ligase 1	0	0	0	0	0	0	0
HORVU0Hr1G011000	LC_TE	unknown function	0.0161081	0.00420293	0	0	0.047676	0	0
HORVU0Hr1G011010	HC_G	Serine/threonine-protein kinase SMG1	0	0	0	0	0	0	0
HORVU0Hr1G011020	LC_U	unknown function	0.123347	0.056742	0.108722	0	0.068578	0	0
HORVU0Hr1G011030	HC_G	Hydroxymethylglutaryl-CoA lyase	0.409457	0	0	0.117299	0	0	0
HORVU0Hr1G011040	HC_G	ARM repeat superfamily protein	1.40936	5.02691	15.7799	42.6685	42.2126	31.6259	38.4297
HORVU0Hr1G011050	HC_G	Proteasome-associated protein ECM29 homolog	0.465009	1.14963	5.12427	11.0719	10.922	7.4156	9.25023
HORVU0Hr1G011060	LC_TE	unknown function	0	0	0.0185156	0	0	0.0167934	0.0150799
HORVU0Hr1G011070	LC_TE?	undescribed protein	0	0	0	0	0	0	0
HORVU0Hr1G011080	LC_u	undescribed protein	0	0	0	0	0	0	0
HORVU0Hr1G011090	LC_TE?	undescribed protein	0	0	0	0	0	0	0
HORVU0Hr1G011100	LC_u	undescribed protein	0	0	0	0	0	0	0
HORVU0Hr1G011110	HC_G	Senescence-associated protein	0.282718	0.412099	0	0	0.0862359	0.0559445	0.0347493
HORVU0Hr1G011120	LC_U	Unplaced genomic scaffold PAXINscaffold_121; whole genome shotgun sequence	0.248252	0	0	0	0	0	0.265025
HORVU0Hr1G011130	LC_u	undescribed protein	0	0	0	0	0	0	0
HORVU0Hr1G011140	HC_G	Macaca fascicularis brain cDNA clone: QflA-19312; similar to human similar to rRNA intron-encoded homing endonuclease(LOC391446); mRNA; RefSeq: XM_372959.1	0	0.177135	0.0984378	0	0.0905385	0	0
HORVU0Hr1G011150	HC_G	RRNA intron-encoded homing endonuclease	3358.97	3141.14	1736.01	602.986	926.062	772.166	428.08
HORVU0Hr1G011160	LC_u	undescribed protein	0	0	0	0	0	0	0
HORVU0Hr1G011170	LC_u	undescribed protein	0	0	0	0	0	0	0
HORVU0Hr1G011180	x	x	0	0	0	0	0	0	0
HORVU0Hr1G011190	LC_u	undescribed protein	0	0	0	0	0	0	0
HORVU0Hr1G011200	LC_u	undescribed protein	0	0	0	0	0	0	0
HORVU0Hr1G011210	LC_u	undescribed protein	0	0	0	0	0	0	0
HORVU0Hr1G011220	LC_u	undescribed protein	0	0	0	0	0	0	0
HORVU0Hr1G011230	LC_u	undescribed protein	0	0	0	0	0	0	0
HORVU0Hr1G011240	LC_TE	Retrotransposon protein; putative; unclassified	0	0	0	0	0	0	0
HORVU0Hr1G011250	LC_TE	unknown function	0	0	0	0	0	0	0
HORVU0Hr1G011260	x	x	0.0112016	0.0374851	0.0272261	0.0287327	0.0114188	0	0.0136249
HORVU0Hr1G011270	x	x	50.5551	33.5341	51.9905	83.9318	34.759	28.9248	24.2478
HORVU0Hr1G011280	HC_G	Aquaporin-like superfamily protein	0.0610215	0	0.00048003	0.0333925	0.231793	0.389005	0.821392
HORVU0Hr1G011290	LC_u	undescribed protein	0	0	0	0	0	0	0
HORVU0Hr1G011300	LC_u	undescribed protein	0	0	0	0	0	0	0
HORVU0Hr1G011310	HC_G	Xaa-Pro dipeptidase	33.4749	22.01	24.0479	41.789	37.2793	30.7714	33.2746
HORVU0Hr1G011320	HC_G	LysM domain containing protein; expressed	0	0	0	0	0	0	0
HORVU0Hr1G011330	HC_G	NAC domain protein;	0	0	0	0	0	0	0
HORVU0Hr1G011340	LC_u	undescribed protein	0	0.213815	0	0	0	0	0
HORVU0Hr1G011350	LC_TE	Retrovirus-related Pol polyprotein from transposon TNT 1-94	0	0	0	0	0	0	0
HORVU0Hr1G011360	LC_u	undescribed protein	0	0	0	0	0	0	0
HORVU0Hr1G011370	LC_u	undescribed protein	0	0	0	0	0	0	0
HORVU0Hr1G011380	LC_u	undescribed protein	0	0	0	0	0	0	0
HORVU0Hr1G011390	LC_u	undescribed protein	0	0.329905	0.24844	0.563943	0.645474	0.336382	0.360701
HORVU0Hr1G011400	LC_u	undescribed protein	0	0	0	0	0	0	0
HORVU0Hr1G011410	LC_u	undescribed protein	0	0	0	0	0	0	0
HORVU0Hr1G011420	HC_G	Leucine-rich repeat protein kinase family protein	0.0150193	0.0445574	0	0	0	0	0
HORVU0Hr1G011430	HC_G	Cyclin family protein	3.44897	3.50502	12.7868	9.80684	4.7516	5.68105	5.36893
HORVU0Hr1G011440	HC_G	Ethylene insensitive 3 family protein	0	0	0	0	0	0	0
HORVU0Hr1G011450	HC_G	Stress responsive A/B Barrel Domain	0.380282	1.44828	2.09533	15.6333	81.2226	157.067	214.356
HORVU0Hr1G011460	HC_G	RING/U-box superfamily protein	23.6001	17.2481	16.8412	18.7833	16.2848	21.2796	25.5678
HORVU0Hr1G011470	x	x	2.38959	4.76535	8.80714	6.83578	8.26059	6.89346	6.21431
HORVU0Hr1G011480	HC_G	Serine/threonine-protein kinase	0	0.0107935	0.243945	3.00614	5.39574	4.5449	4.75959
HORVU0Hr1G011490	LC_U	unknown function	0.711511	0	0	0	0	0	0
HORVU0Hr1G011500	HC_u	undescribed protein	0	0.483527	0	0	0	0	0
HORVU0Hr1G011510	HC_G	30S ribosomal protein S3	83.9518	36.5373	6.70151	4.61598	5.29563	3.32109	1.97135
HORVU0Hr1G011520	HC_G	Ribosomal protein S4; mitochondrial	52.4303	18.4089	3.23706	1.93165	0.922291	0.613779	0.414872
HORVU0Hr1G011530	LC_u	undescribed protein	0	0	0	0	0	0	0
HORVU0Hr1G011540	LC_u	undescribed protein	4.28842	0.17216	0.423986	0	0	0	0
HORVU0Hr1G011550	x	x	230.296	96.2039	21.9504	14.205	8.19828	7.21443	4.78232
HORVU0Hr1G011560	HC_G	Methionine--tRNA ligase	17.6627	29.2739	46.5371	53.615	67.8852	65.3693	60.4471
HORVU0Hr1G011570	HC_G	Protein kinase superfamily protein	5.93515	7.06447	7.49305	11.1819	5.1548	5.79863	11.28
HORVU0Hr1G011580	HC_G	Ribosomal protein-like	0.0479505	0	0	0	0	0	0
HORVU0Hr1G011590	LC_TE	unknown function	0	0	0	0	0	0	0
HORVU0Hr1G011600	HC_G	nucleobase-ascorbate transporter 7	0	0.0818928	0.118823	0.0905008	0.025592	0.062552	0
HORVU0Hr1G011610	HC_G	cellulose synthase-like D5	0.0463	0.0206	0.0284	0.046	0.151	1.34e-07	0.064
HORVU0Hr1G011620	HC_G	cellulose synthase-like D5	0	0	0	0	0.806762	1.06253	0.223143
HORVU0Hr1G011630	HC_G	Far-red impaired response protein-like	0	0	0	0	0	0	0
HORVU0Hr1G011640	LC_TE	Retrotransposon protein; putative; unclassified	0	0	0	0	0	0	0
HORVU0Hr1G011650	HC_G	F-box protein-like	0	0	0	0	0	0	0
HORVU0Hr1G011660	HC_u	undescribed protein	0.220653	0.159129	0.859068	0.00734105	4.47141	1.11195	0.496103
HORVU0Hr1G011670	HC_G	2;3-bisphosphoglycerate-independent phosphoglycerate mutase	0	0.0246108	0	0	0	0	0
HORVU0Hr1G011680	LC_M	undescribed protein	0	0	0	0	0	0	0
HORVU0Hr1G011690	x	x	0	0	0	0	0	0.191367	0.160244
HORVU0Hr1G011700	HC_G	AT-hook motif nuclear-localized protein 20	0.052859	0.0789632	0.0645113	0.0681375	0.0480612	0.0524254	0.112368
HORVU0Hr1G011710	LC_TE	Retrotransposon protein; putative; Ty3-gypsy subclass	0	0.0557655	0.0466247	0.000969163	0	0	0.0304687
HORVU0Hr1G011720	HC_G	Major pollen allergen Bet v 1-B	0.160548	6.62481	18.0892	40.5917	116.531	81.0638	29.7119
HORVU0Hr1G011730	HC_G	unknown function	0	3.0517	1.42134	1.80736	3.45558	4.10489	1.09681
HORVU0Hr1G011740	LC_u	undescribed protein	1.25126	1.91786	3.23479	1.73483	3.07055	2.24203	1.97826
HORVU0Hr1G011750	HC_G	Putative endonuclease or glycosyl hydrolase	0	0	0	0	0	0	0
HORVU0Hr1G011760	HC_G	UDP-sugar pyrophosphorylase	0	1.08549	4.53193	0.628361	1.2548	1.75837	1.10249
HORVU0Hr1G011770	HC_G	BTB/POZ domain-containing protein	0	0.00240517	0	0	0	0	0
HORVU0Hr1G011780	LC_TE	unknown function	0	0	0	0	0	0	0
HORVU0Hr1G011790	LC_U	unknown function	0	0	0	0	0	0	0
HORVU0Hr1G011800	LC_TE	RNA-directed DNA polymerase (reverse transcriptase)-related family protein	0.042926	0.112153	0.192005	0.285825	0.155972	0.205902	0.0797957
HORVU0Hr1G011810	LC_u	undescribed protein	0	0	0	0	0	0	0
HORVU0Hr1G011820	LC_TE	Retrotransposable element Tf2 155 kDa protein type 3	0	0	0	0	0	0	0
HORVU0Hr1G011830	LC_TE	Retrotransposon protein; putative; Ty3-gypsy subclass	0.0147484	0.0442005	0.00831857	0.0501524	0.0103604	0.0384921	0.0294923
HORVU0Hr1G011840	HC_G	unknown function	0	0	0	0	0	0.091905	0
HORVU0Hr1G011850	LC_u	undescribed protein	16.226	14.7986	14.6415	14.5442	9.7984	12.4222	14.4384
HORVU0Hr1G011860	HC_G	Peroxisomal membrane 22 kDa (Mpv17/PMP22) family protein	6.87483	7.68433	24.2337	30.6395	16.3681	9.67332	6.93295
HORVU0Hr1G011870	LC_U	Plant protein of unknown function (DUF863)	0.176504	0.0460318	0.0514252	0.942569	26.1902	46.2066	58.0373
HORVU0Hr1G011880	LC_U	unknown function	0	0	0	0	0	0	0
HORVU0Hr1G011890	HC_G	Nuclear transcription factor Y subunit C-2	0	0.7308	0	0	0	0.254075	0
HORVU0Hr1G011900	LC_TE	Retrotransposon protein; putative; Ty3-gypsy subclass	0	0	0	0	0	0	0
HORVU0Hr1G011910	LC_TE	unknown function	0	0	0	0	0	0	0
HORVU0Hr1G011920	LC_u	undescribed protein	0.165329	0	0	0	0.247174	0	0.161497
HORVU0Hr1G011930	LC_TE	unknown function	0.125277	0.783705	0.959774	0.776093	0.420523	0.224922	0.200143
HORVU0Hr1G011940	HC_G	40S ribosomal protein S29	222.779	204.539	302.147	438.144	465.02	398.973	325.985
HORVU0Hr1G011950	LC_TE	unknown function	0.406768	0.482338	3.07909	3.11265	0.939094	0.591515	0.622919
HORVU0Hr1G011960	LC_TE	unknown function	0	0	0	0.11485	0	0	0
HORVU0Hr1G011970	LC_TE	unknown function	0	0	0	0	0	0	0
HORVU0Hr1G011980	LC_TE	Retrotransposon protein; putative; unclassified	0	0	0	0	0	0	0
HORVU0Hr1G011990	LC_u	undescribed protein	0.517805	0	0	0	0	0	0
HORVU0Hr1G012000	LC_u	undescribed protein	0.376084	0.453536	1.26673	2.0037	0.794665	0.758908	0.599368
HORVU0Hr1G012010	LC_u	undescribed protein	0	0	0	0	0	0	0
HORVU0Hr1G012020	LC_u	undescribed protein	0	0	0	0	0	0	0
HORVU0Hr1G012030	LC_u	undescribed protein	0	0	0	0	0	0	0
HORVU0Hr1G012040	LC_TE	unknown function	0	0	0	0	0	0	0
HORVU0Hr1G012050	HC_u	undescribed protein	1.43688	0.772419	2.56563	2.88985	2.73649	3.81246	4.67595
HORVU0Hr1G012060	LC_u	undescribed protein	0.125914	0.767922	0.861644	0.48021	0.549678	0.380678	0.643484
HORVU0Hr1G012070	LC_u	undescribed protein	0	0	0	0	0	0	0
HORVU0Hr1G012080	HC_U	unknown function	0	0	0	0	0	0	0
HORVU0Hr1G012090	HC_U	unknown function	0	0	0	0	0	0	0
HORVU0Hr1G012100	HC_G	Flotillin-like protein 2	0.021929	0.0193185	0	0	0	0.0190046	0.0217535
HORVU0Hr1G012110	x	x	0	0	0	0	0	0	0
HORVU0Hr1G012120	LC_u	undescribed protein	0	0	0	0	0	0	0
HORVU0Hr1G012130	HC_G	Protein kinase superfamily protein	0	0	0	0	0.251734	1.05588	1.63473
HORVU0Hr1G012140	HC_G	Leucine-rich repeat receptor-like protein kinase family protein	0.0545874	0.361181	4.00181	4.72542	9.02677	9.3625	6.49188
HORVU0Hr1G012150	LC_u	undescribed protein	0	0	0	0	0	0	0
HORVU0Hr1G012160	HC_G	Serine/threonine-protein phosphatase 7 long form-like protein	0	0	0	0	0	0	0
HORVU0Hr1G012170	LC_u	undescribed protein	8.51738	4.10546	0.516585	0.58705	0.469293	1.4149	0.917445
HORVU0Hr1G012180	LC_TE?	unknown function	0	0	0	0	0	0	0.0817328
HORVU0Hr1G012190	HC_G	DNA-binding protein SMUBP-2	0.393399	0.237194	0.3722	0.903145	0.775673	0.749696	0.738952
HORVU0Hr1G012200	LC_U	unknown function	0	0	0	0	0	0	0
HORVU0Hr1G012210	LC_TE	Retrotransposon protein; putative; unclassified	0	0.147135	0.72747	0.174946	0.446475	0.785423	0.181335
HORVU0Hr1G012220	HC_G	Cell division cycle 5-like protein	0	0	0	0	0	0	0
HORVU0Hr1G012230	HC_G	GDSL esterase/lipase	0.0786513	0	0	0.048008	0.0618395	0.154001	0.107383
HORVU0Hr1G012240	LC_u	undescribed protein	0	0	0	0	0	0	0
HORVU0Hr1G012250	LC_u	undescribed protein	1.66884	2.8063	4.05817	1.6386	1.17417	0.887224	1.0228
HORVU0Hr1G012260	HC_G	undescribed protein	15.2562	8.25912	11.8354	8.85336	12.5898	8.49868	15.9457
HORVU0Hr1G012270	LC_u	undescribed protein	0	0.304028	0	0	0	0	0
HORVU0Hr1G012280	LC_u	undescribed protein	0	0	0.464014	0	1.13436	0.945461	1.00184
HORVU0Hr1G012290	LC_u	undescribed protein	0	0	0	0	0	0	0
HORVU0Hr1G012300	HC_G	Dgd1 suppressor 1 isoform 1	0.0865169	0.0471855	0.243178	0.221274	0.0322047	0.0473249	0.0151385
HORVU0Hr1G012310	LC_u	undescribed protein	0	0.427515	0	0	0	0.0966552	0.0954133
HORVU0Hr1G012320	LC_TE	unknown function	3.98e-09	0	0	0	0	0	0
HORVU0Hr1G012330	LC_u	undescribed protein	0	0	0	0	0	0	0
HORVU0Hr1G012340	LC_u	undescribed protein	0.359277	0.226235	0.165191	0	0.0447632	0.0550405	0.150898
HORVU0Hr1G012350	HC_G	ORF protein	0	0	0	0	0	0	0
HORVU0Hr1G012360	LC_u	undescribed protein	0	0.30716	0	0	0	0	0
HORVU0Hr1G012370	HC_G	SWIB/MDM2 domain superfamily protein	16.9637	14.7295	22.0361	17.1569	17.513	13.2879	10.8419
HORVU0Hr1G012380	LC_u	undescribed protein	0	0	0	0	0	0	0
HORVU0Hr1G012390	HC_G	GDSL esterase/lipase	0.144949	0.313372	0.495466	0.712246	0.648335	0.679561	1.80858
HORVU0Hr1G012400	LC_u	undescribed protein	0	0	0	0	0	0	0
HORVU0Hr1G012410	HC_G	Dehydrogenase/reductase SDR family member 4	145.513	179.653	143.154	86.5025	79.3086	99.9228	99.3279
HORVU0Hr1G012420	LC_u	undescribed protein	0	0	0	0	0	0	0
HORVU0Hr1G012430	LC_TE	Retrovirus-related Pol polyprotein from transposon TNT 1-94	0	0	0	0	0	0	0
HORVU0Hr1G012440	LC_u	undescribed protein	0	0	0	0	2.69548	7.4065	13.2077
HORVU0Hr1G012450	LC_TE	Retrotransposon protein	0	0	0	0	0	0	0
HORVU0Hr1G012460	HC_G	Plastid-lipid-associated protein; chloroplastic	44.6	36.45	13.4835	8.07139	4.3137	6.25338	7.50269
HORVU0Hr1G012470	LC_u	undescribed protein	0	0	0	0	0	0	0
HORVU0Hr1G012480	LC_u	undescribed protein	0.113541	0	0	0	0	0	0.0531732
HORVU0Hr1G012490	HC_TE?	Argonaute family protein	1.26508	0.797035	1.39844	5.13572	9.68739	7.18932	7.92347
HORVU0Hr1G012500	LC_TE	Retrotransposon protein; putative; Ty3-gypsy subclass	0	0	0	0	0	0	0
HORVU0Hr1G012510	HC_G	Phosphoinositide phospholipase C 6	13.2225	12.4115	24.8939	36.8596	34.931	45.0237	57.4886
HORVU0Hr1G012520	HC_G	DNA binding protein	15.033	8.27962	14.2635	16.2037	9.24598	9.06712	7.73592
HORVU0Hr1G012530	HC_U	Chromosome 3B; genomic scaffold; cultivar Chinese Spring	0	0	0	0	0	0	0
HORVU0Hr1G012540	LC_TE	unknown function	0	0	0	0	0	0	0
HORVU0Hr1G012550	LC_u	undescribed protein	0	0	0	0	0	0	0
HORVU0Hr1G012560	HC_G	Core-2/I-branching beta-1;6-N-acetylglucosaminyltransferase family protein	0.0745415	0	0.184236	0.109993	0.0568092	0	0.0714417
HORVU0Hr1G012570	HC_U	Chromosome 3B; genomic scaffold; cultivar Chinese Spring	0	0	0	0	0	0	0
HORVU0Hr1G012580	LC_U	unknown protein; Has 29 Blast hits to 29 proteins in 11 species: Archae - 0; Bacteria - 0; Metazoa - 0; Fungi - 0; Plants - 29; Viruses - 0; Other Eukaryotes - 0 (source: NCBI BLink).	29.4852	18.6698	25.6293	26.9953	22.8638	18.114	15.4361
HORVU0Hr1G012590	LC_u	undescribed protein	1.61782	2.31921	3.58284	3.95612	2.82404	2.19678	1.78718
HORVU0Hr1G012600	LC_u	undescribed protein	0	0	0	0	0	0	0
HORVU0Hr1G012610	LC_u	undescribed protein	0	0	0	0	0	0	0
HORVU0Hr1G012620	HC_G	Histone-lysine N-methyltransferase NSD3	50.0602	34.4259	54.4637	64.0197	28.7871	22.9844	25.1661
HORVU0Hr1G012630	HC_G	tRNA-specific adenosine deaminase	11.8977	7.40711	12.5345	16.9007	11.115	8.78398	9.32054
HORVU0Hr1G012640	LC_u	undescribed protein	0	0	0	0	0	0	0
HORVU0Hr1G012650	LC_u	undescribed protein	0	0	0	0	0	0.972399	1.0324
HORVU0Hr1G012660	LC_u	undescribed protein	0	0	0	0	0	0	0
HORVU0Hr1G012670	HC_u	undescribed protein	0	0	0	0	0	0.714088	1.3496
HORVU0Hr1G012680	HC_G	Clavaminate synthase-like protein	7.95e-09	3.81e-08	3.68e-08	9.13e-09	4.12e-09	2.99e-10	3.13e-10
HORVU0Hr1G012690	LC_TE	HAT dimerisation domain-containing protein; putative	0	0	0	0	0	0	0
HORVU0Hr1G012700	LC_u	undescribed protein	0	0	0	0	0	0	0
HORVU0Hr1G012710	HC_G	BTB/POZ domain-containing protein	0.0317051	0.00736775	0.108797	0.239797	0.578291	1.10225	1.62386
HORVU0Hr1G012730	LC_TE	Endonuclease-reverse transcriptase	0	0	0	0	0	0	0
HORVU0Hr1G012740	HC_G	WRKY family transcription factor	0.0160726	0.033751	0	0	0	0	0
HORVU0Hr1G012750	HC_G	WRKY family transcription factor	0	0	0	0	0	0.143488	0
HORVU0Hr1G012760	LC_TE	unknown function	0	0	0	0	0	0	0
HORVU0Hr1G012770	LC_TE	Retrotransposon protein; putative; unclassified; expressed	0	0	0	0	0	0	0
HORVU0Hr1G012780	HC_U	unknown function	0	0	0	0	0	0	0
HORVU0Hr1G012790	HC_G	basic helix-loop-helix (bHLH) DNA-binding superfamily protein	0	0	0.010633	0.024167	0	0	0
HORVU0Hr1G012800	LC_TE?	Lysine-specific demethylase REF6	0	0	0	0	0	0	0
HORVU0Hr1G012810	LC_u	undescribed protein	0	0	0	0	0	0	0.641188
HORVU0Hr1G012820	HC_G	protein kinase family protein	0	0	0	0	0	0	0
HORVU0Hr1G012830	LC_u	undescribed protein	0	0	0	0	0	0	0
HORVU0Hr1G012840	LC_U	unknown function	0.0356858	0.049569	0.0959487	0.0449773	0.0212657	0.0688672	0.0593019
HORVU0Hr1G012850	HC_U	unknown function	0	0	0	0	0.0948118	0	0
HORVU0Hr1G012860	HC_G	Alcohol dehydrogenase	0.159899	0.226309	0.410486	0.203352	0.583769	0.428071	0.525177
HORVU0Hr1G012870	HC_G	Pentatricopeptide repeat-containing protein	0.0158538	0.0505945	0.0402468	0.022351	0.017701	0.032543	0
HORVU0Hr1G012880	LC_TE?	FAR1-related sequence 5	0	0	0	0	0.0168513	0	0.00944478
HORVU0Hr1G012890	HC_G	Pentatricopeptide repeat-containing protein	2.08468	0.0868835	1.1301	0	0.1075	1.58373e-05	0
HORVU0Hr1G012900	LC_u	undescribed protein	0	0	0	0	0	0	0
HORVU0Hr1G012910	HC_G	RING finger protein 44	0.738099	0.255566	0.294558	0.558304	2.43855	1.48461	0.896583
HORVU0Hr1G012920	HC_G	receptor-like kinase 1	0	0.273146	0.426128	0.12885	0.394048	0.644668	0.349121
HORVU0Hr1G012930	HC_u	undescribed protein	14.4513	24.0562	11.0548	5.76645	1.08121	0.65505	1.24028
HORVU0Hr1G012940	HC_G	Alcohol dehydrogenase	0.695269	105.982	155.327	20.5255	9.92575	16.4801	15.8722
HORVU0Hr1G012950	HC_G	Membrane protein PTM1-like	28.4859	25.5984	66.797	177.194	150.619	168.81	185.112
HORVU0Hr1G012960	LC_u	undescribed protein	0	0	0	0	0	0	0
HORVU0Hr1G012970	HC_G	Lung seven transmembrane receptor family protein	3.47093	2.32726	10.5107	29.1716	22.9728	22.0056	30.2785
HORVU0Hr1G012980	x	x	4.92152	16.8249	20.1839	19.5962	9.75636	9.41215	11.7107
HORVU0Hr1G012990	HC_G	Flavin-containing monooxygenase family protein	0.537902	0.546291	0.492275	1.76627	5.59259	4.88835	4.44658
HORVU0Hr1G013000	LC_u	undescribed protein	0	0	0	0	0	0	0
HORVU0Hr1G013010	HC_G	Hypro1	0	0.0788885	0.133713	1.2083	0.000703175	0	0.879131
HORVU0Hr1G013020	HC_G	Hypro1	0.0218418	0.665905	0.243286	1.76715	6.11294	8.10738	6.50193
HORVU0Hr1G013030	HC_G	Early light-induced protein 1; chloroplastic	0.215649	0.11299	0.065519	0	0.0775783	0	0
HORVU0Hr1G013040	HC_G	Nef-associated protein 1	18.5304	13.5845	15.5951	21.3289	17.604	13.7581	10.8453
HORVU0Hr1G013050	LC_u	undescribed protein	0	0	0	0	0	0	0
HORVU0Hr1G013060	HC_G	cinnamoyl coa reductase 1	0	0	0	0	0.0443595	0	0.0403838
HORVU0Hr1G013070	HC_G	cinnamoyl coa reductase	0.0419322	0	0	0.123623	1.93092	2.81424	7.66266
HORVU0Hr1G013080	HC_G	PHD finger protein	0.836562	1.19375	0.125468	0.0248306	0.00471983	0.00678505	0
HORVU0Hr1G013090	HC_G	Pentatricopeptide repeat-containing protein	0.573181	1.2373	2.57157	3.98352	2.30873	1.53883	1.24365
HORVU0Hr1G013100	x	x	1.28046	0.819308	0.908996	1.40234	1.60011	3.84075	11.3424
HORVU0Hr1G013110	HC_G	unknown function	0.053849	0.0537931	0.246318	0.226551	0.163736	0.0546974	0.116521
HORVU0Hr1G013120	HC_U	unknown protein; Has 26 Blast hits to 26 proteins in 10 species: Archae - 0; Bacteria - 0; Metazoa - 0; Fungi - 0; Plants - 26; Viruses - 0; Other Eukaryotes - 0 (source: NCBI BLink).	0	0.21079	0.69873	0.507483	1.87193	3.40503	1.98383
HORVU0Hr1G013130	LC_u	undescribed protein	0	0	0	0	6.38347	5.65122	8.66329
HORVU0Hr1G013140	HC_G	Tuliposide A-converting enzyme b2; amyloplastic	0	0	0	0	0	0	0
HORVU0Hr1G013150	LC_U	unknown function	0	0	0	0	0	0	0
HORVU0Hr1G013160	HC_G	alpha/beta-Hydrolases superfamily protein	2.53473	5.90652	4.33258	1.87089	4.49211	4.85349	4.03881
HORVU0Hr1G013170	HC_G	alpha/beta-Hydrolases superfamily protein	0	0	0	0	0	0	0
HORVU0Hr1G013180	HC_G	alpha/beta-Hydrolases superfamily protein	5.82e-06	4.69e-05	2.65	1.36e-05	1.49	0.633	3.22e-06
HORVU0Hr1G013190	HC_G	histone H2A 6	6.67227	8.60723	27.1023	28.2128	331.052	341.842	273.633
HORVU0Hr1G013200	HC_G	alpha/beta-Hydrolases superfamily protein	1.51711	4.10151	4.20008	2.1978	4.46237	5.54802	3.4808
HORVU0Hr1G013210	LC_U	unknown protein; BEST Arabidopsis thaliana protein match is: unknown protein .	23.3264	22.4868	30.7912	22.9943	13.9572	16.0029	17.183
HORVU0Hr1G013220	HC_G	Glucose-6-phosphate isomerase	19.3024	19.8646	25.6573	39.8725	66.827	66.2037	70.1724
HORVU0Hr1G013230	LC_u	undescribed protein	0	0	0	0	0	0	0
HORVU0Hr1G013240	HC_G	Threonine endopeptidase	29.9507	19.7902	16.0524	17.7629	19.7703	15.2556	14.3135
HORVU0Hr1G013250	HC_G	CYCLIN D4;1	0.926759	2.25604	2.37608	1.05015	1.58796	1.36674	0.929712
HORVU0Hr1G013260	HC_G	Myosin-J heavy chain	0	0	0	0	0.676905	0.410112	0.835633
HORVU0Hr1G013270	LC_u	undescribed protein	0	0.792998	0	2.07431	0	0	0
HORVU0Hr1G013280	HC_U	unknown function	0	0	0	0	0	0	0
HORVU0Hr1G013290	HC_G	nuclear transport factor 2A	1.74016	0	3.3391	0	0	0	0
HORVU0Hr1G013300	LC_u	undescribed protein	0	0	0	0	0	0	0
HORVU0Hr1G013310	HC_u	undescribed protein	0	0	0	0	0	0	0
HORVU0Hr1G013320	LC_u	undescribed protein	0	0	0	0	0	0	0
HORVU0Hr1G013330	LC_u	undescribed protein	0	0	0	0	0	0	0
HORVU0Hr1G013340	HC_G	Fructose-1;6-bisphosphatase; cytosolic	0.43536	0.822221	0	0.686307	0.372302	0.138258	0.472683
HORVU0Hr1G013350	HC_G	peroxisome 1	0	0	0	0	6.5e-05	0	0.019
HORVU0Hr1G013360	LC_TE	RNA-directed DNA polymerase (reverse transcriptase)-related family protein	0.0878238	1.0772	0.760177	0.125903	0	0.0852678	0.143585
HORVU0Hr1G013370	LC_U	unknown function	3.04	4.9003	15.1753	15.8651	7.81316	5.87107	6.86948
HORVU0Hr1G013380	HC_G	respiratory burst oxidase homologue D	0.154	2.04	2.1	0.434	0.00694	1.66e-09	0.225
HORVU0Hr1G013390	HC_G	GDP-D-mannose 3';5'-epimerase	0	0	0.267647	0	0	0.209564	0.103038
HORVU0Hr1G013400	x	x	77.204	74.1625	104.523	78.9853	35.5632	34.9292	38.78
HORVU0Hr1G013410	x	x	0	0	0	0	0	0	0
HORVU0Hr1G013420	LC_TE	unknown function	0	0.0207905	0	0.032894	0	0	0
HORVU0Hr1G013430	HC_G	Cytochrome c oxidase subunit 3	0	0	0	0	0	0	0
HORVU0Hr1G013440	LC_u	undescribed protein	0	0.185922	0.205509	0.3854	0.941928	0.672722	0.698218
HORVU0Hr1G013450	HC_G	U-box domain-containing protein 33	0	0	0	0	0	0	0
HORVU0Hr1G013460	HC_G	Transcription factor 25	0	0	0	0	0	0	0
HORVU0Hr1G013470	HC_G	serine carboxypeptidase-like 19	0.00102399	0.00112409	0.00659456	0.00255938	0.00174243	0.000778015	0.000769683
HORVU0Hr1G013480	LC_u	undescribed protein	0	0	0	0	0	0	0
HORVU0Hr1G013490	HC_G	Ethylene-responsive transcription factor 15	0	0	0	0	0	0	0
HORVU0Hr1G013500	LC_u	undescribed protein	0	0	0	0	0	0	0
HORVU0Hr1G013510	HC_G	Homeobox-leucine zipper protein ROC6	3.03518	5.43355	27.6416	18.1813	15.5258	9.44331	11.314
HORVU0Hr1G013520	x	x	0	0	0	0	0	0	0
HORVU0Hr1G013530	x	x	30.6009	44.5976	83.5023	68.6298	29.8832	25.7436	26.8705
HORVU0Hr1G013540	LC_u	undescribed protein	0	0	0	0	0	0	0
HORVU0Hr1G013550	LC_TE	Transposon protein; putative; Mutator sub-class	0	0.0364955	0	0	0	0.0254245	0.0227437
HORVU0Hr1G013560	LC_TE	unknown function	0.619389	0.257036	0.342428	0.130415	1.16971	0.174094	0.0326885
HORVU0Hr1G013570	LC_TE	Transposon protein; putative; CACTA; En/Spm sub-class	0	0	0	0	0	0	0
HORVU0Hr1G013580	LC_TE	Zinc finger BED domain-containing protein RICESLEEPER 2	0	0	0	0	0	0	0
HORVU0Hr1G013590	LC_u	undescribed protein	0	0	0	0	0	0	0
HORVU0Hr1G013600	LC_u	undescribed protein	0	0	0	0	0	0	0
HORVU0Hr1G013610	HC_G	Tetratricopeptide repeat (TPR)-like superfamily protein	0.0157177	0.0298457	0.0166155	0.0212862	0	0	0
HORVU0Hr1G013620	LC_TE?	RAD3-like DNA-binding helicase protein	0.0251473	0.0053585	0.0950827	0.293922	0.91453	1.13378	0.533369
HORVU0Hr1G013630	LC_U	unknown function	0	0	0	0	0	0	0
HORVU0Hr1G013640	LC_TE	Retrotransposon protein; putative; unclassified	0	0	0	0	0	0	0
HORVU0Hr1G013650	LC_U	unknown function	0.217498	1.87416	0.908498	1.45993	0	0.364397	0.0266005
HORVU0Hr1G013660	HC_G	DNA mismatch repair protein MutL	0	0	0.203708	0.156673	0.127383	0.139844	0.0610398
HORVU0Hr1G013670	LC_TE	Retrotransposon protein; putative; unclassified	0	0	0	0	0	0	0
HORVU0Hr1G013680	HC_G	Mitochondrial transcription termination factor family protein	0	0	0	0	0	0	0
HORVU0Hr1G013690	LC_TE	unknown function	0	0	0	0	0	0	0
HORVU0Hr1G013700	HC_U	BnaA03g27060D protein	11.8585	10.7677	9.94454	3.59377	14.0356	13.5763	7.74587
HORVU0Hr1G013710	LC_TE?	Helicase SKI2W	0	0.137051	0.160303	0	0	0	0
HORVU0Hr1G013720	HC_U	unknown function	0.00109913	0	0.00134171	0.0252843	0.00118994	0	0
HORVU0Hr1G013730	LC_TE	Retrotransposon protein; putative; unclassified	0	0	0	0	0	0	0
HORVU0Hr1G013740	HC_G	unknown function	2.69428	7.86045	6.54421	4.46013	4.49489	3.25297	1.9566
HORVU0Hr1G013750	HC_G	pentatricopeptide repeat 336	0.123814	0.0613494	0.00803002	0.705145	0.734281	1.56319	4.21797
HORVU0Hr1G013760	HC_U	unknown function	0	0.685228	1.47134	1.0651	5.44167	3.96795	7.33294
HORVU0Hr1G013770	HC_G	PRA1 (Prenylated rab acceptor) family protein	1.38995	21.8154	14.4414	4.16195	7.16354	6.60425	5.29561
HORVU0Hr1G013780	HC_G	Protein LURP-one-related 15	0.0649238	0	0	0	0	0	0
HORVU0Hr1G013790	LC_u	undescribed protein	0	0	0	0	0	0	0
HORVU0Hr1G013800	HC_G	oligopeptide transporter	0.0196132	0	0	0	0.164728	0.112415	0.319234
HORVU0Hr1G013810	LC_u	undescribed protein	0	0	0	0	0	0	0
HORVU0Hr1G013820	LC_u	undescribed protein	0.401235	0.137778	0.0812055	0.08858	0	0	0
HORVU0Hr1G013830	HC_G	Protein kinase superfamily protein	0	0.015177	0.0186885	0	0.0628414	0.168651	0.0316075
HORVU0Hr1G013840	LC_U	unknown function	0	0.0112622	0	0	0	0	0
HORVU0Hr1G013850	HC_G	Succinate dehydrogenase [ubiquinone] flavoprotein subunit; mitochondrial	85.0839	92.1491	140.771	214.668	245.352	275.045	272.533
HORVU0Hr1G013860	x	x	0	0	0	0	0	0	0
HORVU0Hr1G013870	HC_u	undescribed protein	0	0	0	0	0	0	0
HORVU0Hr1G013880	LC_u	undescribed protein	0	0	0	0	0	0	0
HORVU0Hr1G013890	HC_G	Peroxisomal (S)-2-hydroxy-acid oxidase	0	0	0	0	0	0	0
HORVU0Hr1G013900	HC_G	L-lactate dehydrogenase	0.205128	1.46095	0.505784	0.0815386	0.331481	0.550871	1.19266
HORVU0Hr1G013910	HC_u	undescribed protein	0.957349	3.02201	2.64353	1.28099	1.28163	1.00573	0.5673
HORVU0Hr1G013920	HC_G	Eukaryotic translation initiation factor 3 subunit L	0	0	0	0	0	0	0
HORVU0Hr1G013930	HC_G	Chitobiosyldiphosphodolichol beta-mannosyltransferase	0	0	0	0	0	0	0
HORVU0Hr1G013940	HC_G	Chitobiosyldiphosphodolichol beta-mannosyltransferase	0	0	0	0	0	0	0
HORVU0Hr1G013950	HC_G	G-box binding factor 3	45.3302	49.3575	19.2497	3.88652	0.963683	1.08097	2.09343
HORVU0Hr1G013960	HC_G	Protein kinase family protein	0	0	0	0	0	0	0
HORVU0Hr1G013970	LC_u	undescribed protein	0	0	0	0	0	0	0
HORVU0Hr1G013980	LC_u	undescribed protein	0	0	0	0	0	0	0
HORVU0Hr1G013990	LC_TE	hAT dimerisation domain-containing protein / transposase-related	0	0	0	0	0	0	0
HORVU0Hr1G014000	HC_TE?	Zinc finger MYM-type protein 5	0.0785763	0.0424788	0	0	0	0	0
HORVU0Hr1G014010	LC_TE	unknown function	0	0	0	0	0	0	0
HORVU0Hr1G014020	HC_G	Splicing factor 3B subunit 1	0.213661	0.0326078	0.0251055	0.0773724	0.0111328	0.0200562	0.0100448
HORVU0Hr1G014030	HC_G	PLC-like phosphodiesterases superfamily protein	0.729355	0.168437	1.8865	5.34195	5.15785	7.76099	6.8738
HORVU0Hr1G014040	HC_G	PI-PLC X domain-containing protein	0.0673239	0.0326403	0.0239887	0.132796	0.237695	0.41438	0.629955
HORVU0Hr1G014050	HC_G	Nucleolar complex protein 2 homolog	23.5224	12.3873	33.9633	86.4007	37.5963	35.8211	32.7251
HORVU0Hr1G014060	HC_U	unknown function	2.32049	5.52922	1.96972	0.430614	0.586776	0.829546	0.579315
HORVU0Hr1G014070	HC_G	Leukotriene A-4 hydrolase homolog	3.2236	4.91771	8.57361	4.89644	13.1525	9.19441	5.77037
HORVU0Hr1G014080	HC_G	TD and POZ domain-containing protein 4	0.260328	0.109322	0.279937	0.237827	0.0911405	0	0.079143
HORVU0Hr1G014090	LC_u	undescribed protein	0	0	0	0	0	0	0
HORVU0Hr1G014100	HC_G	SCAR homolog 2	0.668342	1.20356	3.00502	6.3027	4.19948	3.97164	6.15127
HORVU0Hr1G014110	HC_G	SCAR-like protein 1	2.8424	2.92358	8.59913	15.3165	8.51441	8.30774	11.4545
HORVU0Hr1G014120	HC_G	CASP-like protein 4B3	0.0313315	0.093509	0.0688123	0	0.103013	0.598782	0.491964
HORVU0Hr1G014130	LC_u	undescribed protein	0	0	0	0	0	0	0
HORVU0Hr1G014140	HC_G	receptor kinase 2	0	0	0	0	0	0	0
HORVU0Hr1G014150	HC_G	Glucose-1-phosphate adenylyltransferase family protein	2.50174	2.65182	1.40733	0.928463	3.65946	10.4533	29.1898
HORVU0Hr1G014160	LC_TE	Polynucleotidyl transferase; ribonuclease H-like superfamily protein	0	0	0	0	0	0	0
HORVU0Hr1G014170	HC_G	Chaperone protein DnaJ	2.35737	2.1838	2.39283	1.67308	4.27036	6.09924	9.27678
HORVU0Hr1G014180	LC_u	undescribed protein	0	0	0	0	0	0	0
HORVU0Hr1G014190	HC_G	Chaperone protein DnaJ	0	0	0	0	0.0870293	0	0
HORVU0Hr1G014200	HC_G	Orphans transcription factor	0.610692	0.621804	1.90508	2.97742	1.88846	2.11118	2.54991
HORVU0Hr1G014210	HC_G	Electron transfer flavoprotein subunit alpha	0	0.193	0	0	0	0	0
HORVU0Hr1G014220	HC_G	DNA-directed RNA polymerase I subunit 1	0	0	0	0	0	0	0
HORVU0Hr1G014230	HC_G	Clathrin light chain 2	0	0	0	0	0	0	0
HORVU0Hr1G014240	HC_G	Electron transfer flavoprotein subunit alpha	0.300388	0.86946	1.04328	0.183504	0.74741	1.94495	0.617976
HORVU0Hr1G014250	HC_U	Chromosome 3B; genomic scaffold; cultivar Chinese Spring	1.15779	0.437194	0.941323	0.985739	0.560692	0.71186	0.737926
HORVU0Hr1G014260	HC_TE?	Lysine-specific demethylase REF6	0.755738	0	0.119376	0.412029	0.141355	0.0940935	0.309534
HORVU0Hr1G014270	HC_G	U3 small nucleolar RNA-associated protein 25	29.0147	17.5862	29.0541	41.8505	22.2304	15.3867	13.0362
HORVU0Hr1G014280	HC_G	DnaJ homolog subfamily B member 12	0	0.0192968	0.0207171	0	0	0	0
HORVU0Hr1G014290	HC_G	exoribonuclease 4	0.174805	0.0847428	0	0	0.0318675	0	0
HORVU0Hr1G014300	HC_G	Transcription factor bHLH25	0	0	0	0	0.0107965	0.0441776	0.143421
HORVU0Hr1G014310	LC_u	undescribed protein	0	0	0	0.102321	0.218513	0.495652	0.371207
HORVU0Hr1G014320	LC_u	undescribed protein	0	0	0	0	0	0	0
HORVU0Hr1G014330	x	x	1.36788	1.50081	2.34386	6.97869	3.28131	7.84105	2.82061
HORVU0Hr1G014340	LC_TE	Retrotransposon protein; putative; unclassified	0	0	0	0	0	0	0
HORVU0Hr1G014350	LC_u	undescribed protein	0	0	0	0	0	0	0
HORVU0Hr1G014360	HC_G	ammonium transporter 2	0	0	0.358231	0.249012	0.170899	0.129002	0.0650847
HORVU0Hr1G014370	HC_G	Subtilase family protein	0	0	0	0	0	0	0
HORVU0Hr1G014380	LC_TE	Retrotransposon protein; putative; unclassified	0.0233802	0.695846	0.0724012	0.0388952	0.00539823	0.0161765	0.0145992
HORVU0Hr1G014390	HC_G	Cysteine/Histidine-rich C1 domain family protein	0	0	0.051613	0.0621945	0	0.0432823	0
HORVU0Hr1G014400	HC_G	Beta-fructofuranosidase; insoluble isoenzyme 4	0	0	0.0287705	0.0633278	0.0320182	0	0.111082
HORVU0Hr1G014410	LC_u	undescribed protein	0	0.266043	0	0.341295	0	0.555083	0
HORVU0Hr1G014420	x	x	4.64292	0.66421	0.766169	0	0	0	0
HORVU0Hr1G014430	LC_u	undescribed protein	0	0	0	0	0	0	0
HORVU0Hr1G014440	LC_TE	Retrotransposon protein; putative; Ty1-copia subclass	0	0	0	0	0	0	0.188669
HORVU0Hr1G014450	HC_u	undescribed protein	1.44792	29.8272	54.7895	17.9292	4.0603	2.32012	2.81662
HORVU0Hr1G014460	HC_G	Inactive poly [ADP-ribose] polymerase RCD1	0.197369	1.72348	2.11704	0.896301	0.139489	0.0630924	0.019032
HORVU0Hr1G014470	LC_TE	Retrotransposon protein; putative; unclassified	0	0	0	0	0	0	0
HORVU0Hr1G014480	LC_u	undescribed protein	0	0	0	0	0	0	0
HORVU0Hr1G014490	HC_G	Aquaporin-like superfamily protein	0.017933	0.0196564	0.0211032	0.449171	3.11477	3.06376	2.63564
HORVU0Hr1G014500	HC_U	Protein of unknown function; DUF617	0.0329798	0.355477	0	0	0	0	0
HORVU0Hr1G014510	HC_G	unknown function	0.671434	0.712997	1.5522	3.17845	3.36374	3.27287	4.42278
HORVU0Hr1G014520	HC_G	Plant invertase/pectin methylesterase inhibitor superfamily protein	0	0	0	0	0	0	0
HORVU0Hr1G014530	LC_M	hAT dimerisation domain-containing protein	0	0.0457695	0	0	0	0	0
HORVU0Hr1G014540	HC_G	undescribed protein	0	0	0	0	0	0	0
HORVU0Hr1G014550	LC_TE	unknown function	0	0	0	0	0	0	0
HORVU0Hr1G014560	LC_TE	unknown function	0	0.00469433	0	0	0	0	0
HORVU0Hr1G014570	HC_G	unknown function	0	0	0	0	0	0	0
HORVU0Hr1G014580	HC_TE?	F-box domain containing protein; expressed	0	0	0	0	0.235544	0	0
HORVU0Hr1G014590	LC_TE	Transposon protein; putative; CACTA; En/Spm sub-class	0	0.0529963	0.0067578	0.0362603	0	0	0.0110543
HORVU0Hr1G014600	LC_TE?	F-box/RNI-like superfamily protein	0.160929	0.357463	0	0	0.179023	0	0
HORVU0Hr1G014610	LC_TE	Transposon protein; putative; CACTA; En/Spm sub-class	0	0.0195561	0.0115828	0.0677828	0.0655549	0.0207498	0.0516542
HORVU0Hr1G014620	HC_u	undescribed protein	0	0.238674	0.318856	0.153655	0	0.700926	0.323362
HORVU0Hr1G014630	HC_G	Protein kinase superfamily protein	0.120054	0.124922	0.175809	0.248353	0.247685	0.123042	0.210731
HORVU0Hr1G014640	LC_u	undescribed protein	0	0	0	0	0	0	0
HORVU0Hr1G014650	HC_G	Protein kinase superfamily protein	0	0	0	0	0	0	0
HORVU0Hr1G014660	HC_G	unknown function	0	0	0	0	0	0	0
HORVU0Hr1G014670	LC_u	undescribed protein	0	0	0	0	0	0	0
HORVU0Hr1G014680	LC_u	undescribed protein	0	0	0	0	0	0	0
HORVU0Hr1G014690	LC_u	undescribed protein	0	0.132216	0.336002	0	0	0	0.134465
HORVU0Hr1G014700	LC_u	undescribed protein	0	0	0	0	0	0	0
HORVU0Hr1G014710	LC_u	undescribed protein	0	0	0	0	0	0	0
HORVU0Hr1G014720	HC_G	Leaf-specific thionin	0	0	0	0	0	0	0
HORVU0Hr1G014730	LC_u	undescribed protein	0	0	0	0	0	0	0
HORVU0Hr1G014740	LC_u	undescribed protein	0	0	0	0.934705	0.756505	0	2.29063
HORVU0Hr1G014750	HC_G	thionin 2.1	22.3325	7.10008	4.09356	48.1202	104.718	104.459	169.739
HORVU0Hr1G014760	HC_G	kinesin 3	0.0775355	0.0796577	0.187311	1.91367	11.9263	9.48751	9.79054
HORVU0Hr1G014770	HC_G	kinesin 2	0.106278	0.034963	0.220047	1.24	6.56159	5.45284	5.62915
HORVU0Hr1G014780	HC_G	plastid developmental protein DAG; putative	9.51131	14.8876	14.5114	5.58665	6.32937	6.68692	1.40858
HORVU0Hr1G014790	HC_TE?	Chromosome 3B; genomic scaffold; cultivar Chinese Spring	10.9215	4.10108	4.02866	1.85931	1.75614	1.06252	2.54369
HORVU0Hr1G014800	LC_TE	Retrotransposon protein; putative; unclassified	0	0	0	0	0	0	0
HORVU0Hr1G014810	HC_G	2;3-bisphosphoglycerate-independent phosphoglycerate mutase	0	0.126655	0	0	0	0	0
HORVU0Hr1G014820	LC_U	unknown function	0	0.0329905	0	0	0.123879	0	0
HORVU0Hr1G014830	LC_TE	Retrotransposon protein; putative; unclassified	0	0	0	0	0	0	0
HORVU0Hr1G014840	HC_G	Leucine-rich repeat receptor-like protein kinase family protein	0	0	0.00275083	0	0	0	0
HORVU0Hr1G014850	LC_TE	unknown function	0	0	0	0	0	0	0
HORVU0Hr1G014860	LC_u	undescribed protein	0	0	0	0	0	0	0
HORVU0Hr1G014870	LC_TE?	unknown function	0	0	0	0	0	0	0
HORVU0Hr1G014880	HC_G	Leucine-rich repeat receptor-like protein kinase family protein	0	0	0	0	0	0	0
HORVU0Hr1G014890	LC_u	undescribed protein	0	0.681318	2.28345	0	0	0.663427	0
HORVU0Hr1G014900	HC_G	Trihelix transcription factor GT-2	10.5389	12.1841	9.98649	5.06752	8.59856	6.25323	5.75839
HORVU0Hr1G014910	LC_u	undescribed protein	0	0	0	0.307125	0.266795	0	0.537935
HORVU0Hr1G014920	LC_M	undescribed protein	0	0	0	0	0	0	0
HORVU0Hr1G014930	LC_U	Chromosome 3B; genomic scaffold; cultivar Chinese Spring	0	0	0	0	0	0	0
HORVU0Hr1G014940	HC_G	Zinc finger with UFM1-specific peptidase domain protein	0	0	0	0	0	0	0
HORVU0Hr1G014950	HC_G	Protein kinase superfamily protein	0	0	0	0	0	0	0
HORVU0Hr1G014960	HC_G	GDSL esterase/lipase	0.0201048	0	0.0114205	0	0	0	0
HORVU0Hr1G014970	LC_u	undescribed protein	0	0.245118	0.255628	0.577388	0.592675	0.176193	0.281022
HORVU0Hr1G014980	HC_G	4-coumarate:CoA ligase 2	0	0	0	0	0.00617342	0	0
HORVU0Hr1G014990	LC_u	undescribed protein	0	0	0	0	0	0	0
HORVU0Hr1G015000	LC_u	undescribed protein	0	0	0	0	0	0	0
HORVU0Hr1G015010	LC_u	undescribed protein	0	0	0	0	0	0	0
HORVU0Hr1G015020	LC_TE	unknown function	0	0	0	0	0	0	0
HORVU0Hr1G015030	HC_G	unknown function	3.58727	3.24566	6.1253	5.89662	2.16527	1.92531	1.69722
HORVU0Hr1G015040	LC_u	undescribed protein	0	0	0	0	0	0	0
HORVU0Hr1G015050	HC_u	undescribed protein	0	0	0	0	0	0	0
HORVU0Hr1G015060	LC_u	undescribed protein	0	0	0	0	0	0	0
HORVU0Hr1G015070	LC_u	undescribed protein	0	0	0	0	0	0	0
HORVU0Hr1G015080	LC_u	undescribed protein	0	0	0	0	0	0	0
HORVU0Hr1G015090	HC_u	undescribed protein	0	0	0	0	0	0	0
HORVU0Hr1G015100	LC_u	undescribed protein	0	0	0	0	0	0	0
HORVU0Hr1G015110	LC_u	undescribed protein	0	0	0	0	0	0	0
HORVU0Hr1G015120	LC_u	undescribed protein	0	0	0	0	0	0	0
HORVU0Hr1G015130	HC_G	Pre-mRNA-splicing factor ISY1 homolog	0	0	0	0	0	0	0
HORVU0Hr1G015140	LC_u	undescribed protein	0	0	0.32048	0.425846	0	0.198173	0
HORVU0Hr1G015150	LC_U	unknown function	0	0.505031	0.105267	0	0.321423	0	0
HORVU0Hr1G015160	HC_G	Disease resistance protein	0	0	0	0.0142296	0.6938	1.46199	2.73466
HORVU0Hr1G015170	LC_u	undescribed protein	0	0	0.473907	0	0	0.390995	0
HORVU0Hr1G015180	HC_G	AT-hook motif nuclear-localized protein 1	8.33365	8.3313	12.375	21.4361	26.367	19.3114	18.7652
HORVU0Hr1G015190	HC_G	Disease resistance protein RPM1	0	0	0	0	0.70486	1.18659	2.1633
HORVU0Hr1G015200	LC_u	undescribed protein	0	0	0	0	0	0	0
HORVU0Hr1G015210	HC_u	undescribed protein	0	0	0	0	0	0	0
HORVU0Hr1G015220	HC_G	chloride channel B	0	0	0.0136374	0.200368	4.40144	8.29097	11.8661
HORVU0Hr1G015230	HC_G	NB-ARC domain-containing disease resistance protein	0	0	0.0479856	0.375767	1.55479	1.8765	2.65396
HORVU0Hr1G015240	LC_u	undescribed protein	0	0	0	0	0	0	0
HORVU0Hr1G015250	LC_U	unknown function	67.3362	54.246	66.6901	48.5149	22.3614	22.4288	19.9424
HORVU0Hr1G015260	HC_U	Chromosome 3B; genomic scaffold; cultivar Chinese Spring	30.0965	24.077	26.3441	46.5155	21.0194	14.9622	12.595
HORVU0Hr1G015270	HC_U	unknown function	0	0	0	0	0	0	0
HORVU0Hr1G015280	HC_G	Leucine-rich receptor-like protein kinase family protein	0	0.0302444	0.0839139	0.303875	0.325004	0.364958	0.206214
HORVU0Hr1G015290	HC_TE?	unknown function	0	0	0	0	0	0	0
HORVU0Hr1G015300	HC_U	unknown function	0	0	0	0	3.53e-07	6.08e-07	1e-06
HORVU0Hr1G015310	LC_TE	Retrotransposon protein; putative; Ty3-gypsy subclass	0	0	0	0	0	0	0
HORVU0Hr1G015320	LC_u	undescribed protein	0	0	0	0	0	0	0
HORVU0Hr1G015330	LC_U	unknown function	0	0	0	0	0	0	0
HORVU0Hr1G015340	LC_TE	Transposon protein; putative; Mutator sub-class	0	0	0	0.059585	0	0	0
HORVU0Hr1G015350	LC_TE	unknown function	0	0	0	0.0982125	0.135717	0.0304138	0.285967
HORVU0Hr1G015360	HC_G	undescribed protein	0.0178449	0.0185143	0	0	0.0195596	0	0
HORVU0Hr1G015370	HC_G	Protein of unknown function (DUF579)	0.86071	1.1177	0.515537	0.092009	0.236451	0.338156	0.18854
HORVU0Hr1G015380	HC_G	serine/threonine protein kinase 1	7.65001	14.7087	16.5915	12.671	10.808	9.66799	10.6785
HORVU0Hr1G015390	HC_G	Formin-like protein 10	1.86718	2.789	2.90421	2.72089	4.90362	5.61628	6.36961
HORVU0Hr1G015400	LC_u	undescribed protein	0.161656	0.504091	0.188865	0.0589233	0.107739	0.107186	0.050399
HORVU0Hr1G015410	HC_G	Cleavage and polyadenylation specificity factor subunit 4	1.12164	1.91765	3.52042	2.47213	1.12897	0.40944	0.649878
HORVU0Hr1G015420	HC_G	EH domain-containing protein 1	0.830032	0.18203	0.731496	3.71433	14.3354	14.1877	12.6906
HORVU0Hr1G015430	LC_M	undescribed protein	0	0	0	0.047869	0.129774	0	0.0310915
HORVU0Hr1G015440	HC_G	Ethylene responsive transcription factor 4	1.4986	1.95938	1.79639	0.23143	1.5148	0.474724	0.282688
HORVU0Hr1G015450	HC_U	unknown protein; Has 35333 Blast hits to 34131 proteins in 2444 species: Archae - 798; Bacteria - 22429; Metazoa - 974; Fungi - 991; Plants - 531; Viruses - 0; Other Eukaryotes - 9610 (source: NCBI BLink).	57.6419	50.6153	29.8883	18.0254	7.87061	5.621	6.76431
HORVU0Hr1G015460	LC_u	undescribed protein	3.60625	18.0412	15.4606	12.1481	10.7803	13.0554	10.3627
HORVU0Hr1G015470	HC_G	Chlorophyll synthase; chloroplastic	0	0.609895	0	0	0	0	0
HORVU0Hr1G015480	LC_U	unknown function	0	0.07683	0	0.114607	0	0	0
HORVU0Hr1G015490	LC_u	undescribed protein	0	0.449337	1.87396	0.739043	1.12179	0.559468	0
HORVU0Hr1G015500	HC_G	Peroxidase	0.159996	0.155502	0	0	0	0	0
HORVU0Hr1G015510	HC_TE?	F-box/RNI-like/FBD-like domains-containing protein	0	0	0.945987	0	0	0	0
HORVU0Hr1G015520	HC_G	unknown function	18.9188	31.4447	38.1781	18.4463	7.57766	5.6106	5.28708
HORVU0Hr1G015530	HC_G	receptor kinase 2	11.7212	25.9496	22.2168	18.2139	8.11998	7.2859	7.46691
HORVU0Hr1G015540	LC_u	undescribed protein	0	4.33737	1.82752	1.98192	0	0	0
HORVU0Hr1G015550	LC_u	undescribed protein	0	0	0	0	0	0	0
HORVU0Hr1G015560	HC_G	O-fucosyltransferase family protein	2.39214	2.6363	7.80495	11.4783	10.7228	10.2296	11.7463
HORVU0Hr1G015570	HC_G	Lipid A export ATP-binding/permease protein MsbA	0.0437157	0.259528	0.212262	0.217487	0.133689	0.0823277	0.0833835
HORVU0Hr1G015580	LC_u	undescribed protein	0	0	0	0	0	0	0
HORVU0Hr1G015590	HC_G	receptor-like kinase 902	0	0.0142595	0.0312098	0.0253999	0.176639	0.265645	0.13585
HORVU0Hr1G015600	HC_G	Cytochrome P450 superfamily protein	4.09492	5.37045	6.52076	10.389	2.70383	1.09816	0.479316
HORVU0Hr1G015610	LC_u	undescribed protein	0	0	2.24696	0	0	0.579832	0.655118
HORVU0Hr1G015620	LC_u	undescribed protein	0	0	0	0	0	0	0
HORVU0Hr1G015630	HC_G	Pentatricopeptide repeat-containing protein	0.685615	0.836198	1.2896	2.1797	1.36293	1.427	1.19557
HORVU0Hr1G015640	LC_u	undescribed protein	0	0	0	0	0	0	0
HORVU0Hr1G015650	HC_U	Protein of unknown function (DUF630 and DUF632)	0.020777	0.0224644	0.0253963	0.232112	1.26761	0.522222	0.680404
HORVU0Hr1G015660	HC_G	DNA mismatch repair protein MutL	1.63216	2.06994	2.0194	1.30246	2.64703	2.65218	1.94659
HORVU0Hr1G015670	LC_TE	Retrotransposon protein; putative; Ty3-gypsy subclass	0	0.0170526	0.0401186	0	0	0	0
HORVU0Hr1G015680	HC_G	UPF0392 protein	0.628203	1.28922	4.03916	3.10892	0.979591	0.842645	0.760115
HORVU0Hr1G015690	LC_u	undescribed protein	0	0	0	0	0	0	0
HORVU0Hr1G015700	HC_G	Alpha/beta hydrolase family protein	3.47982	5.49404	16.0904	19.8975	18.3544	18.8122	20.9055
HORVU0Hr1G015710	HC_G	transcription factor-related	0	0.0106915	0	0	0	0.2877	0.330315
HORVU0Hr1G015720	LC_u	undescribed protein	0	0.593117	0	0	0	0	0
HORVU0Hr1G015730	LC_u	undescribed protein	0	0	0	0	0	0	0
HORVU0Hr1G015740	LC_u	undescribed protein	0	0	0	0	0	0	0
HORVU0Hr1G015750	HC_G	Proteasome subunit beta type-3	92.833	77.9115	91.7134	97.0105	85.7313	82.2764	78.3022
HORVU0Hr1G015760	HC_TE?	zinc-finger protein 1	0.877505	1.76273	1.16269	0.362272	0.9747	1.04723	0.942503
HORVU0Hr1G015770	HC_G	Protein S-acyltransferase 24	15.22	20.7659	33.2229	32.0724	19.9949	20.7565	25.653
HORVU0Hr1G015780	HC_G	Receptor-like protein kinase	1.55116	1.00965	1.00859	2.68682	4.91524	7.75472	11.3978
HORVU0Hr1G015790	LC_TE	Retrotransposon protein; putative; unclassified; expressed	0	0	0	0	0	0	0
HORVU0Hr1G015810	HC_G	kinesin-like protein 1	3.53333	2.4087	8.93683	17.4013	16.7589	18.3206	22.2599
HORVU0Hr1G015820	HC_G	Apoptosis inhibitor 5	35.0001	29.9024	40.8044	80.5618	74.3902	63.6313	78.3587
HORVU0Hr1G015830	HC_G	Ribonuclease J	5.35348	3.19463	5.77081	10.7041	14.9357	21.0186	35.7907
HORVU0Hr1G015840	HC_G	Ribonuclease J	1.84153	2.11722	4.9993	9.73367	16.1491	21.9438	40.7623
HORVU0Hr1G015850	HC_G	Leucine-rich repeat family protein; putative; expressed	0.244206	0.050634	0.291558	0.99484	0.320116	0.047922	0.7175
HORVU0Hr1G015860	HC_U	unknown function	0	0	0	0	0	0	0
HORVU0Hr1G015870	LC_TE	Autonomous transposable element EN-1 mosaic protein	0.112973	0.0776817	0.359397	0.143763	0.123763	0.122102	0.188011
HORVU0Hr1G015880	LC_u	undescribed protein	0	0	0	0	0	0	0
HORVU0Hr1G015890	HC_G	IBR domain-containing protein isoform 3	4.47174	16.0974	6.6597	4.05109	0.850968	0.194045	0.621957
HORVU0Hr1G015900	LC_u	undescribed protein	0	0	0	0	0	0	0
HORVU0Hr1G015910	HC_u	undescribed protein	0	0	0	0	0	0	0
HORVU0Hr1G015920	LC_u	undescribed protein	0.388556	0	0.153526	0	0	0	0
HORVU0Hr1G015930	HC_G	Ergosterol biosynthetic protein 28	0.052977	0.112974	0.189982	0.340572	6.42073	21.7632	25.6781
HORVU0Hr1G015940	LC_u	undescribed protein	0	0	0	0	0	0	0
HORVU0Hr1G015950	HC_G	Long-chain-alcohol oxidase FAO1	2.86832	4.77655	2.46917	3.09077	12.1129	8.37623	3.15144
HORVU0Hr1G015960	HC_G	Leucine-rich repeat (LRR) family protein	28.1207	17.2805	9.42329	5.82735	3.93079	5.52299	5.856
HORVU0Hr1G015970	HC_G	Pentatricopeptide repeat-containing protein	0.318014	0.283663	0.766684	1.54575	1.28032	1.0283	0.726277
HORVU0Hr1G015980	HC_G	Protein kinase superfamily protein	0	0.0114898	0	0	0	0	0.0116852
HORVU0Hr1G015990	HC_U	unknown function	0.958444	1.10916	2.88451	2.50354	3.46689	3.70917	2.93724
HORVU0Hr1G016000	HC_G	Ubiquitin carboxyl-terminal hydrolase 13	3.12121	3.87847	9.73427	12.8674	8.48507	7.44846	7.54291
HORVU0Hr1G016010	LC_u	undescribed protein	0	0	0	0	0	0	0
HORVU0Hr1G016020	HC_G	Myosin-J heavy chain	0.65079	0.388458	0.285863	1.3771	0.791451	0.943554	0.792432
HORVU0Hr1G016030	LC_TE	unknown function	0.159059	0.0323442	0.180863	0.0839778	0.110679	0	0
HORVU0Hr1G016040	HC_G	Nodulin MtN21/EamA-like transporter family protein	0	0	0	0	0	0	0
HORVU0Hr1G016050	HC_G	MACPF domain-containing protein	4.33133	7.2904	17.3441	12.2024	4.96268	5.29814	4.6411
HORVU0Hr1G016060	HC_G	Myosin-J heavy chain	0.421372	0.247473	0.460577	0.174468	0	0	0.137531
HORVU0Hr1G016070	LC_TE	Retrotransposon protein; putative; unclassified	0	0	0	0	0	0	0
HORVU0Hr1G016080	x	x	0	0	0	0	0	0	0
HORVU0Hr1G016090	LC_U	unknown function	0.81652	20.7913	8.85577	0.550767	0.907133	2.28528	0.44176
HORVU0Hr1G016100	LC_TE	unknown function	0.046039	0.477553	0.754459	0.46662	0.089209	0.0779428	0.0970695
HORVU0Hr1G016110	LC_TE	unknown function	0	0	0	0	0	0	0
HORVU0Hr1G016120	LC_u	undescribed protein	0.3555	0.695647	0.38858	0	0.235544	0	0.304132
HORVU0Hr1G016130	HC_G	SAUR-like auxin-responsive protein family	0.0602377	0.377853	0.142488	0	0.478199	0.369023	0.0713058
HORVU0Hr1G016140	HC_G	Major ampullate spidroin 2-2	0.921025	1.29877	0.753753	2.21521	1.87929	1.32757	1.03928
HORVU0Hr1G016150	HC_G	RNA-binding protein 39	2.36515	1.85805	3.2156	3.38241	8.89826	20.3393	58.8055
HORVU0Hr1G016160	LC_u	undescribed protein	0	0	0	0	0	0	0
HORVU0Hr1G016170	HC_G	unknown function	3.22799	4.81166	4.63519	4.45331	3.46902	3.63561	2.46566
HORVU0Hr1G016180	HC_G	RmlC-like cupins superfamily protein	4.63339	13.0547	8.81178	3.6141	2.54015	3.07334	1.29121
HORVU0Hr1G016190	HC_G	casein kinase I-like 3	16.9623	12.1647	28.9056	38.336	26.4818	26.167	32.3897
HORVU0Hr1G016200	LC_u	undescribed protein	0	0	0	0	0	0	0
HORVU0Hr1G016210	LC_u	undescribed protein	0	0	0	0	0	0	0
HORVU0Hr1G016220	HC_G	calcium-transporting ATPase; putative	0	0.0305182	0.0120615	0.0123328	0.00980245	0.0150669	0.0203385
HORVU0Hr1G016230	HC_U	Chromosome 3B; genomic scaffold; cultivar Chinese Spring	0.0949376	0.0981488	0.403156	0.302305	0.160832	0.179872	0.0218209
HORVU0Hr1G016240	LC_u	undescribed protein	0	0.165274	0	0	0	0	0
HORVU0Hr1G016250	HC_G	RNA binding	3.82939	3.03345	5.96098	2.79196	3.63198	7.83628	15.6123
HORVU0Hr1G016260	LC_U	unknown function	7.31904	7.15646	7.26855	3.87215	3.42553	3.83847	6.12232
HORVU0Hr1G016270	LC_u	undescribed protein	0	0	0	0	0	0	0
HORVU0Hr1G016280	LC_u	undescribed protein	0	0	0	0	0	0	0
HORVU0Hr1G016290	LC_u	undescribed protein	0.495707	0.790727	1.38289	1.25745	1.16707	1.05212	1.4129
HORVU0Hr1G016300	LC_u	undescribed protein	0	0	0	0	0	0	0
HORVU0Hr1G016310	HC_G	Endochitinase A	0.178537	9.54867	19.1283	8.80731	2.11466	0.897075	0.471737
HORVU0Hr1G016320	LC_u	undescribed protein	0	0	0	0	0	0	0
HORVU0Hr1G016330	HC_G	phenylalanine ammonia-lyase 2	77.2801	47.727	53.0279	88.7077	145.304	227.31	235.92
HORVU0Hr1G016340	HC_U	unknown function	1.09226	2.15715	4.31326	6.10128	4.85243	3.63744	4.24624
HORVU0Hr1G016350	HC_G	Protein of unknown function; DUF584	0.679813	0.295851	0.251792	0.221124	0.107671	0.154131	0.221939
HORVU0Hr1G016360	HC_G	DNAJ homologue 3	135.373	89.173	140.537	133.218	78.2021	59.6728	68.1518
HORVU0Hr1G016370	HC_G	Ethylene-responsive transcription factor 1	0.0321902	0	0.012833	0.0580832	0.0932652	0	0.022992
HORVU0Hr1G016380	HC_G	expansin B4	0.147531	0.0380565	0.213513	0.691656	0.179023	0.146189	0
HORVU0Hr1G016390	LC_u	undescribed protein	0	0	0	0	0	0	0
HORVU0Hr1G016400	LC_TE	Retrotransposon protein; putative; Ty3-gypsy subclass	0	0	0	0.069874	0	0	0
HORVU0Hr1G016410	HC_G	expansin B4	0.254016	1.18433	33.8404	117.432	69.5673	39.5292	24.2776
HORVU0Hr1G016420	HC_G	Two-component response regulator ORR22	0	0	0	0	0	0.0476591	0
HORVU0Hr1G016430	HC_G	Bifunctional inhibitor/lipid-transfer protein/seed storage 2S albumin superfamily protein	8.57627	11.807	19.603	10.3322	14.2452	9.21256	7.06584
HORVU0Hr1G016440	LC_u	undescribed protein	0.332209	0.0549645	0.0646692	0.131013	0.0908262	0	0.051749
HORVU0Hr1G016450	HC_G	Transducin/WD40 repeat-like superfamily protein	9.69186	14.7437	27.1054	12.4821	11.6183	11.1153	9.32435
HORVU0Hr1G016460	LC_u	undescribed protein	0	0	0	0	0	0	0
HORVU0Hr1G016470	HC_G	cationic amino acid transporter 6	0	1.18426	0.570379	0.215432	0.157813	0.15995	0.488017
HORVU0Hr1G016480	HC_G	RING/U-box superfamily protein	0	3.23712	2.14004	0.63936	0.489571	0.210019	0.0573357
HORVU0Hr1G016490	LC_u	undescribed protein	0	0	0	0	0	0	0
HORVU0Hr1G016500	LC_TE?	Peroxidase	0	0	0	0	0	0	0
HORVU0Hr1G016510	HC_G	RING/U-box superfamily protein	0.596557	0.42337	0.390217	1.79699	1.91767	2.29728	3.52589
HORVU0Hr1G016520	LC_u	undescribed protein	0	0	0	0	0	0.0613375	0.0491178
HORVU0Hr1G016530	HC_G	Ubiquinol oxidase	0	0	0	0	0	0	0
HORVU0Hr1G016540	HC_G	Ethylene-responsive transcription factor 4	0	0.0834393	0.406426	0.403489	0.263917	0.245751	0.0243266
HORVU0Hr1G016550	LC_u	undescribed protein	0	0	0	0	0	0	0
HORVU0Hr1G016560	HC_U	unknown function	0.0415116	0.0292755	0.0116357	0.0135228	0.0407481	0.217151	0.340933
HORVU0Hr1G016570	HC_u	undescribed protein	0	0	0	0	0	0	0
HORVU0Hr1G016580	LC_U	Protein of unknown function (DUF604)	0.250429	0.276552	0.524262	0.486229	0.543075	0.290502	0.26343
HORVU0Hr1G016590	HC_G	growth-regulating factor 3	0.632831	1.28112	1.02541	1.81835	2.3821	2.11821	2.25283
HORVU0Hr1G016600	LC_TE	unknown function	0.0694157	0.186302	0.281828	0.0613068	0.127551	0	0
HORVU0Hr1G016610	HC_G	Growth-regulating factor 4	0.301367	0.212514	0.106026	0.056361	0.103877	0.156842	0.352974
HORVU0Hr1G016620	LC_u	undescribed protein	0	0.235623	0.562903	1.35689	1.01534	0.075253	0.807828
HORVU0Hr1G016630	HC_U	unknown protein; BEST Arabidopsis thaliana protein match is: unknown protein .	76.0335	103.838	62.4786	24.0578	26.7025	40.7614	35.1488
HORVU0Hr1G016640	HC_G	AAA-type ATPase family protein	28.9601	15.6631	15.5714	38.0988	12.1474	4.15614	5.99991
HORVU0Hr1G016650	HC_u	undescribed protein	3.25254	4.68754	4.30222	3.75753	3.12532	3.13399	2.68235
HORVU0Hr1G016660	HC_G	Protein kinase superfamily protein	0	0	0	0	0	0	0
HORVU0Hr1G016670	LC_TE	Retrotransposon protein; putative; unclassified	0.0487425	0.0184368	0.16257	0.180635	0.214929	0.141335	0.189996
HORVU0Hr1G016680	HC_G	Protein Brevis radix-like 2	0	0	0	0	0.057339	0.133755	0.042959
HORVU0Hr1G016690	HC_u	undescribed protein	0	0.565843	1.37676	0	0	0	0.549495
HORVU0Hr1G016700	HC_G	PENTATRICOPEPTIDE REPEAT 596	0.0326	1.17e-07	1.03e-09	0.0544	6.48e-09	0.603	0.47
HORVU0Hr1G016710	LC_TE?	Helicase SKI2W	0	0	0	0.048117	0	0	0
HORVU0Hr1G016720	HC_G	3-ketodihydrosphingosine reductase	8.65029	12.7972	13.3842	8.7544	13.7208	9.84443	7.30965
HORVU0Hr1G016730	LC_TE	Retrotransposon protein; putative; unclassified	0	0	0	0	0	0	0.069671
HORVU0Hr1G016740	LC_TE	unknown function	0	0	0	0	0	0	0
HORVU0Hr1G016750	LC_TE	unknown function	0.191691	0.420654	0.182253	0.404863	0.124692	0.222996	0.238583
HORVU0Hr1G016760	LC_TE	Retrotransposon protein; putative; unclassified; expressed	0	0	0	0	0	0	0
HORVU0Hr1G016770	LC_TE	Retrotransposon protein; putative; unclassified	0	0	0	0	0	0	0
HORVU0Hr1G016780	HC_G	Cytochrome P450 superfamily protein	4.95162	45.7434	41.2951	14.553	7.05342	6.67933	4.88206
HORVU0Hr1G016790	LC_TE	unknown function	0	0	0	0	0	0	0
HORVU0Hr1G016800	LC_u	undescribed protein	0	0.103757	0.118734	0.111082	0	0	0
HORVU0Hr1G016810	LC_u	undescribed protein	0	0.161702	0.169122	0	0	0	0
HORVU0Hr1G016820	HC_G	Protein kinase superfamily protein	8.59833	8.32288	21.642	22.0948	12.435	13.3086	12.1431
HORVU0Hr1G016830	HC_G	sugar transporter 6	0	0	0.520177	0.526912	1.11516	0.675462	0.198733
HORVU0Hr1G016840	HC_G	Mitochondrial transcription termination factor family protein	0.82191	1.16605	3.89078	3.08896	1.96694	1.49004	1.42906
HORVU0Hr1G016850	LC_u	undescribed protein	0	0	0	0	0	0	0
HORVU0Hr1G016860	HC_G	DNA-binding protein SMUBP-2	1.18342	1.99708	3.45236	6.0257	6.36172	6.53085	6.54393
HORVU0Hr1G016870	LC_TE	Sukkula-1a polyprotein	0	0	0	0	0	0	0
HORVU0Hr1G016880	HC_U	unknown protein; BEST Arabidopsis thaliana protein match is: unknown protein .	12.1895	9.77018	8.58148	11.0384	7.07454	6.78855	7.84742
HORVU0Hr1G016890	HC_G	Eukaryotic aspartyl protease family protein	0.429606	3.42723	1.65581	0.382528	2.10144	1.22167	0.391814
HORVU0Hr1G016900	LC_u	undescribed protein	0	0.213598	0	0	0	0	0
HORVU0Hr1G016910	LC_u	undescribed protein	0	0	0	0	0	0	0
HORVU0Hr1G016920	HC_G	Pentatricopeptide repeat-containing protein	4.78845	5.23962	10.1488	11.4089	7.59958	5.87147	6.18755
HORVU0Hr1G016930	HC_G	Coffea canephora DH200=94 genomic scaffold; scaffold_5	6.73103	3.57545	4.90417	4.71169	4.69256	7.05719	13.6832
HORVU0Hr1G016940	HC_G	histone H2A 6	0	0.0606302	0	0	0.189155	0	0.112798
HORVU0Hr1G016950	HC_TE?	LSD1 zinc finger family protein	0	0	0.335635	0.187271	0	0	0
HORVU0Hr1G016960	HC_U	unknown function	59.8466	48.704	56.8805	49.2936	30.1937	30.2329	33.9939
HORVU0Hr1G016970	HC_G	Stigma-specific Stig1 family protein	0	0	0	0	0	0	0
HORVU0Hr1G016980	HC_G	Stigma-specific Stig1 family protein	0	0	0	0	0	0.0587053	0
HORVU0Hr1G016990	LC_u	undescribed protein	0	0	0.59692	0	0.176697	0	0
HORVU0Hr1G017000	HC_G	2-oxoglutarate (2OG) and Fe(II)-dependent oxygenase superfamily protein	0.227541	0.360343	4.02958	7.81051	14.716	13.6182	9.61825
HORVU0Hr1G017010	HC_G	YELLOW STRIPE like 6	0	0	0	0	0.0166331	0	0
HORVU0Hr1G017020	HC_G	Elongation factor 1-alpha	132.544	131.357	158.566	171.132	134.18	113.399	114.867
HORVU0Hr1G017030	LC_u	undescribed protein	0.137656	0.429791	0.167965	0	0	0	0
HORVU0Hr1G017040	LC_u	undescribed protein	0	0	0	0	0	0	0
HORVU0Hr1G017050	HC_G	Galactose-1-phosphate uridylyltransferase	11.7303	13.408	20.3782	30.6398	26.2204	23.2276	19.6583
HORVU0Hr1G017060	HC_u	undescribed protein	0.077509	0.0849577	0.0972207	0	0	0.0800815	0
HORVU0Hr1G017070	HC_G	Galactose-1-phosphate uridylyltransferase	1.76267	3.18773	4.02947	2.5558	6.71984	3.65129	2.0427
HORVU0Hr1G017080	HC_G	microtubule-associated proteins 70-2	3.46731	3.62528	19.469	35.9224	29.2979	25.7195	27.9547
HORVU0Hr1G017090	HC_G	Mitochondrial transcription termination factor family protein	7.28262	8.11193	17.1957	15.6492	11.0934	8.49548	6.52355
HORVU0Hr1G017100	HC_U	unknown protein; BEST Arabidopsis thaliana protein match is: unknown protein .	5.54816	3.42878	5.61041	11.3264	11.3513	10.7917	12.3706
HORVU0Hr1G017110	HC_u	undescribed protein	0	0	0	0	0	0.126938	0
HORVU0Hr1G017120	HC_G	ATPase GET3	33.3331	33.2317	34.6508	22.5209	13.596	17.1074	27.3955
HORVU0Hr1G017130	HC_G	Aquaporin Z	0	0	0	0	0	0	0.419356
HORVU0Hr1G017140	HC_G	Methyltransferase-like protein 7A	2.27103	2.56825	2.41413	2.53301	3.67893	4.96472	6.31506
HORVU0Hr1G017150	LC_u	undescribed protein	0	0	0	0	0	0	0
HORVU0Hr1G017160	HC_G	Glutaredoxin family protein	0.0388474	0.243094	0.894558	0.81883	1.76134	1.95	1.35217
HORVU0Hr1G017170	HC_G	BAH domain ;TFIIS helical bundle-like domain	11.6832	42.9414	53.7071	38.1283	23.3718	23.1605	25.3026
HORVU0Hr1G017180	HC_u	undescribed protein	0	0.039191	0	0	0.0728962	0	0
HORVU0Hr1G017190	x	x	0	0	0	0	0	0	0
HORVU0Hr1G017200	HC_G	nuclear pore anchor	0.114778	0.313081	1.22973	3.61719	0.900935	0.0765632	0.934475
HORVU0Hr1G017210	HC_G	Nuclear-pore anchor	113.746	62.3417	83.359	84.0711	43.9687	36.5147	25.9456
HORVU0Hr1G017220	HC_G	Mannan endo-1;4-beta-mannosidase 4	0.0436696	0	0.0259489	0.100693	5.21702	10.9058	11.0714
HORVU0Hr1G017230	HC_G	ribonuclease 1	0	0.248715	2.06156	2.52289	10.9997	15.3627	7.85758
HORVU0Hr1G017240	HC_G	ARM repeat superfamily protein	0	0.121848	0.821324	0.615407	0.286188	1.27514	2.99839
HORVU0Hr1G017250	HC_G	Protein DCL; chloroplastic	21.8707	13.3554	7.56243	10.8791	12.6108	21.3659	41.7266
HORVU0Hr1G017260	HC_G	Cytochrome b-c1 complex; subunit 8 protein	18.1084	25.2374	33.6635	58.4336	72.561	90.8013	98.0522
HORVU0Hr1G017270	HC_G	Glycosyltransferase	0	0	0	0	0	0	0
HORVU0Hr1G017280	HC_G	Protein kinase domain containing protein	0	0	0	0	0	0	0
HORVU0Hr1G017290	HC_U	unknown function	0	0	0	0	0	0	0
HORVU0Hr1G017300	LC_TE?	ATP-dependent DNA helicase PIF1	0	0.0192016	0.0320611	0.028294	0.0329993	0.00987035	0.0487682
HORVU0Hr1G017310	LC_TE?	unknown function	0	0	0	0	0	0	0
HORVU0Hr1G017320	HC_TE?	unknown function	6.25243	6.07722	8.56394	9.77042	5.65179	3.88034	4.03146
HORVU0Hr1G017330	HC_G	DNA helicase MCM8	9.27942	6.29048	23.4363	139.892	106.085	97.0866	100.145
HORVU0Hr1G017340	LC_u	undescribed protein	0	0	0	0	0	0	0
HORVU0Hr1G017350	HC_G	H(+)-ATPase 6	0	0.00390205	0.0047308	0.0108145	0.0176007	0	0.00877747
HORVU0Hr1G017360	HC_G	60S ribosomal protein L39-1	2388.33	1836.91	1905.09	1509.53	2479.39	2404.64	1668.45
HORVU0Hr1G017370	HC_G	aspartate aminotransferase 5	49.0883	79.5068	167.487	134.442	91.8063	99.7868	114.842
HORVU0Hr1G017380	HC_G	Serine-rich protein	11.7864	4.14474	1.60523	0.413466	0.253343	0.427141	0.413021
HORVU0Hr1G017390	LC_u	undescribed protein	0	0	0	0	0	0	0
HORVU0Hr1G017400	HC_G	Haloacid dehalogenase-like hydrolase (HAD) superfamily protein	0	0	0	0	0.0363945	0	0
HORVU0Hr1G017410	LC_u	undescribed protein	0	0	0	0	0	0	0
HORVU0Hr1G017420	LC_u	undescribed protein	0	0	0	0	0	0	0
HORVU0Hr1G017430	LC_u	undescribed protein	0.26172	0	0	0	0	0.868862	0.31834
HORVU0Hr1G017440	HC_G	Homoserine O-acetyltransferase	0.970005	1.07239	0.588297	0.444037	2.07052	4.25678	5.42538
HORVU0Hr1G017450	HC_G	Chaperone protein DnaJ	6.78205	8.09776	15.4722	20.2084	13.4847	15.6493	25.0094
HORVU0Hr1G017460	LC_u	undescribed protein	0	0	0	0	0	0	0
HORVU0Hr1G017470	LC_u	undescribed protein	0	0	0	0	0.305445	0	0
HORVU0Hr1G017480	HC_TE?	unknown function	0.00861853	0.0271408	0	0	0.0474936	0.0181034	0.010483
HORVU0Hr1G017490	HC_G	NAC domain protein;	0	0	0	0	0.276984	1.11716	1.85972
HORVU0Hr1G017500	LC_u	undescribed protein	0	0	0	0	0	0	0
HORVU0Hr1G017510	HC_G	protein kinase family protein	10.3892	38.9445	78.0078	54.8969	23.0105	19.9888	21.4777
HORVU0Hr1G017520	LC_u	undescribed protein	0	0	0	0	0	0	0
HORVU0Hr1G017530	HC_U	BnaC01g00720D protein	1.18729	3.39796	7.3872	8.12796	8.39646	6.25927	6.76431
HORVU0Hr1G017540	HC_G	glutathione reductase	95.9307	175.222	264.666	133.355	123.991	133.725	122.712
HORVU0Hr1G017550	LC_u	undescribed protein	0	0	0	0	0	0	0
HORVU0Hr1G017560	HC_G	Cytochrome P450 superfamily protein	3.4427	2.73393	2.96764	4.83913	6.70723	8.51133	13.8658
HORVU0Hr1G017570	HC_G	Inosine-5'-monophosphate dehydrogenase	3.7114	2.05689	2.84613	0.936846	1.06434	2.2313	4.89461
HORVU0Hr1G017580	LC_u	undescribed protein	0	0	0	0	0	0	0
HORVU0Hr1G017590	LC_TE	unknown function	0.061829	0.5599	1.06395	0.335705	0.429384	0.256592	0.204588
HORVU0Hr1G017600	LC_u	undescribed protein	0.0584575	0.719928	0.066948	0.311225	0.128149	0.142617	0
HORVU0Hr1G017610	HC_u	undescribed protein	0	0.0105321	0	0	0.432028	0.791809	0.470617
HORVU0Hr1G017620	HC_G	Actin-related protein 2/3 complex subunit 1B	23.4516	32.57	48.3463	49.6707	32.2932	30.1375	31.4291
HORVU0Hr1G017630	LC_u	undescribed protein	1.49966	0.61795	1.54311	2.11539	1.06261	0.586028	1.09295
HORVU0Hr1G017640	LC_U	unknown function	18.3207	22.6126	51.9993	44.622	18.793	16.7841	16.7003
HORVU0Hr1G017650	LC_u	undescribed protein	0.0824915	0.501538	0.508456	0.112819	0.0929077	0.103397	0.0827983
HORVU0Hr1G017660	LC_u	undescribed protein	0	0	0	0	0	0	0
HORVU0Hr1G017670	HC_G	LOB domain-containing protein 20	0.662052	0.985329	3.33464	0.653868	1.20177	0.388659	0.212842
HORVU0Hr1G017680	HC_U	unknown function	10.523	11.5345	16.8217	15.7151	11.4801	10.5607	10.5797
HORVU0Hr1G017690	HC_G	Cytochrome P450 superfamily protein	0.214296	0.215905	1.33227	1.15389	0.766912	0.662207	0.74005
HORVU0Hr1G017700	LC_u	undescribed protein	0	0	0	0	0	0	0
HORVU0Hr1G017710	HC_G	HXXXD-type acyl-transferase family protein	0	0	0	0.0595707	0	0	0
HORVU0Hr1G017720	HC_G	nicotianamine synthase 1	0	0.0203504	0.0233752	0	0	0	0
HORVU0Hr1G017730	LC_u	undescribed protein	0.0394137	0.510126	0.224944	0.0503012	0.341075	0.123357	0.0721668
HORVU0Hr1G017740	HC_u	undescribed protein	146.928	141.431	173.274	176.475	153.786	124.215	101.584
HORVU0Hr1G017750	HC_u	undescribed protein	0	0	0	0	0	0	0
HORVU0Hr1G017760	HC_G	Remorin family protein	140.533	115.931	31.6085	5.68846	2.05504	2.09555	2.67369
HORVU0Hr1G017770	x	x	24.6366	22.7445	78.9402	101.637	81.1735	54.5881	46.287
HORVU0Hr1G017780	LC_u	undescribed protein	0	0.219693	0.662556	0.363625	0.0654375	0	0.399653
HORVU0Hr1G017790	HC_G	Disease resistance protein	0	0	0	0	0.0243339	0.442849	0.476087
HORVU0Hr1G017800	HC_U	unknown protein; Has 84 Blast hits to 64 proteins in 35 species: Archae - 0; Bacteria - 0; Metazoa - 31; Fungi - 0; Plants - 24; Viruses - 0; Other Eukaryotes - 29 (source: NCBI BLink).	3.15077	3.46741	10.3866	9.45397	6.5537	7.22787	8.27891
HORVU0Hr1G017810	LC_TE	Retrotransposon protein; putative; unclassified; expressed	0.402579	0.105588	0.212192	1.90722	0.69311	0.580854	1.39193
HORVU0Hr1G017820	LC_U	unknown function	0	0	0.0484062	0	0	0	0
HORVU0Hr1G017830	HC_U	Plant protein of unknown function (DUF247)	0	0.018603	0.0103693	0.0539141	0.0176235	0.0264145	0.0513491
HORVU0Hr1G017840	HC_G	Lectin-domain containing receptor kinase A4.3	0	0	0	0	0	0	0
HORVU0Hr1G017850	HC_U	Chromosome 3B; genomic scaffold; cultivar Chinese Spring	0.0059816	0.0119014	0.0545406	0.0300546	0.0435432	0.0187212	0.0163021
HORVU0Hr1G017860	LC_u	undescribed protein	0	0	0	0	0	0	0
HORVU0Hr1G017870	LC_u	undescribed protein	0	0	0	0	0	0	0
HORVU0Hr1G017880	LC_u	undescribed protein	1.37609	1.58786	1.15431	0.225196	0.843332	1.03899	1.86388
HORVU0Hr1G017890	LC_u	undescribed protein	0	0	0	0	0	0	0
HORVU0Hr1G017900	LC_u	undescribed protein	0	0	0.874363	0	0	0	0
HORVU0Hr1G017910	LC_U	unknown function	0	0	0	0	0.044764	0.0806443	0
HORVU0Hr1G017920	LC_u	undescribed protein	0	0	0	0	0	0	0
HORVU0Hr1G017930	LC_U	unknown function	0	0.0178291	0.120752	0.206229	0.0797421	0.12491	0.0824119
HORVU0Hr1G017940	HC_TE?	zinc ion binding	0	0	0.050886	0	0	0	0
HORVU0Hr1G017950	HC_u	undescribed protein	0	0	0	0	0	0	0
HORVU0Hr1G017960	HC_G	Disease resistance protein RPM1	0.0176066	0	0.0201639	0.111337	0.37159	0.911118	1.48143
HORVU0Hr1G017970	HC_G	4-hydroxybenzoate octaprenyltransferase	2.69398	2.08664	5.20112	9.30138	6.00766	4.3804	5.27709
HORVU0Hr1G017980	LC_u	undescribed protein	0	0	0	0	0	0	0
HORVU0Hr1G017990	LC_u	undescribed protein	0.137656	0	2.14746	0.954635	1.7109	1.1542	2.11527
HORVU0Hr1G018000	HC_G	Extended synaptotagmin-1	0	0	0	0	0	0	0
HORVU0Hr1G018010	LC_u	undescribed protein	0	0	0	0	0	0	0
HORVU0Hr1G018020	HC_G	Gibberellin-regulated family protein	0	0	0	0	0	0	0
HORVU0Hr1G018030	HC_G	Replication protein A 32 kDa subunit A	0	0	0	0	0	0	0
HORVU0Hr1G018040	HC_G	Gibberellin-regulated family protein	0	0.0347498	0	0	0.802459	0.712128	0.84653
HORVU0Hr1G018050	HC_G	4-hydroxybenzoate polyprenyltransferase; mitochondrial	0	0	0	0	0	0	0
HORVU0Hr1G018060	HC_G	4-hydroxybenzoate octaprenyltransferase	1.3733	1.30953	1.96284	5.84894	2.552	2.73403	2.79642
HORVU0Hr1G018070	LC_u	undescribed protein	0	0.0764362	0.428124	0.393639	0	0.140378	0.0113645
HORVU0Hr1G018080	LC_u	undescribed protein	0.690185	0.73624	0	0.991138	0	0.841915	0
HORVU0Hr1G018090	HC_G	Replication protein A 32 kDa subunit A	1.51812	1.09355	1.31129	40.4453	34.7767	41.2075	50.1493
HORVU0Hr1G018100	HC_G	Carboxymethylenebutenolidase-like protein	6.34246	9.89364	34.3742	30.1036	16.3292	13.304	14.9162
HORVU0Hr1G018110	LC_u	undescribed protein	0	0.185231	0	0	0	0	0
HORVU0Hr1G018120	HC_G	plastid transcriptionally active 14	3.23892	2.49851	3.85804	4.20118	3.15072	2.78831	4.89619
HORVU0Hr1G018130	LC_u	undescribed protein	0	0	0	0	0	0	0
HORVU0Hr1G018140	HC_G	Survival motor neuron protein	39.0675	42.971	68.1143	65.9519	27.9395	20.5943	21.2061
HORVU0Hr1G018150	LC_U	unknown function	0	0	0	0	0	0	0
HORVU0Hr1G018160	HC_G	MAK16 protein-related	1.20325	0.303916	1.51815	1.94419	1.31826	1.92506	1.51332
HORVU0Hr1G018170	HC_G	Pentatricopeptide repeat-containing protein	0.0588772	0.152235	0.0689714	0.082278	1.20131	1.02022	0.870809
HORVU0Hr1G018180	HC_G	Cell division cycle 5-like protein	0.185395	0.289177	0.0451428	0.0963352	0	0	0.083401
HORVU0Hr1G018190	HC_G	4-coumarate:CoA ligase 3	2.51622	2.99573	1.60924	0.478073	1.48285	1.51975	1.80013
HORVU0Hr1G018200	HC_G	Vacuolar protein sorting-associated protein 27	23.6533	26.8934	49.3417	48.0591	47.2924	47.8919	48.8613
HORVU0Hr1G018210	HC_G	E3 ubiquitin-protein ligase BRE1-like 1	20.9441	29.8931	68.8483	48.003	22.0595	22.8958	25.7385
HORVU0Hr1G018220	LC_u	undescribed protein	0	0	0	0	0	0	0
HORVU0Hr1G018230	LC_u	undescribed protein	0	0	0	0	0	0	0
HORVU0Hr1G018240	HC_G	Ethylene-responsive transcription factor 1	0.0844255	0.0963602	0.171227	0.102857	0.515329	0.543273	0.367768
HORVU0Hr1G018250	HC_U	unknown function	0	0	0	0	0	0.0405605	0
HORVU0Hr1G018260	HC_G	Group XV phospholipase A2	0	0	0.128762	0	0	0.0565428	0.0507735
HORVU0Hr1G018270	HC_G	Cytochrome P450 superfamily protein	1.5333	1.80245	0.993085	0.722228	0.404946	0.0822882	0.0431827
HORVU0Hr1G018280	HC_G	Ethylene-responsive transcription factor 1	0	0.0268822	0	0.0295902	0.114548	0.107483	0.207971
HORVU0Hr1G018290	HC_G	Ethylene-responsive transcription factor 1	0.0537271	0.561317	0.142614	0.187395	1.11718	1.09517	0.689556
HORVU0Hr1G018300	HC_G	Chaperone protein dnaJ 3	145.481	188.01	326.397	402.132	258.754	224.403	222.246
HORVU0Hr1G018310	LC_TE	LINE-1 reverse transcriptase homolog	0.181344	0.52654	0.51957	0.214612	0.261097	0.399893	0.222419
HORVU0Hr1G018320	HC_G	expansin B4	0.009222	0	0.138038	0.208354	7.50409	19.8549	17.7941
HORVU0Hr1G018330	LC_U	unknown function	0	0	0	0	0	0	0
HORVU0Hr1G018340	LC_TE	Retrotransposon protein; putative; Ty3-gypsy subclass	0	0	0	0	0	0	0
HORVU0Hr1G018350	HC_G	60S ribosomal protein L27	0.0567838	0.115507	0.202778	0.0752275	0.0503323	0.187814	0.11556
HORVU0Hr1G018360	HC_G	DNA (cytosine-5)-methyltransferase DRM2	0.35	3.65e-05	1.2e-07	7.5e-07	4.55e-07	0.44	1.05
HORVU0Hr1G018370	HC_U	Unplaced genomic scaffold supercont1.4; whole genome shotgun sequence	74.3421	78.5499	82.6059	62.9076	28.7809	27.1473	23.8417
HORVU0Hr1G018380	HC_G	Glycine cleavage system H protein	168.993	169.119	136.321	116.241	182.712	231.454	201.403
HORVU0Hr1G018390	HC_G	Leucine-rich receptor-like protein kinase family protein	0	0	0.0200297	0	0	0.0405382	0.100727
HORVU0Hr1G018400	LC_u	undescribed protein	0	0	0	0	0	0	0
HORVU0Hr1G018410	HC_G	Adenylate cyclase	0	0	0	0	0	0	0
HORVU0Hr1G018420	LC_u	undescribed protein	0	0	0	0	0	0	0
HORVU0Hr1G018430	HC_G	Adenylate cyclase	0	0	0	0	0	0	0
HORVU0Hr1G018440	LC_u	undescribed protein	0	0	0	0	0	0	0
HORVU0Hr1G018450	HC_G	Adenylate cyclase	0	0	0	0	0	0	0
HORVU0Hr1G018460	LC_u	undescribed protein	0	0	0	0	0	0	0
HORVU0Hr1G018470	HC_G	COP9 signalosome complex subunit 5a	0	0.195147	0.0641255	0	0.023125	0	0
HORVU0Hr1G018480	HC_G	Thioesterase superfamily protein	0.297017	0.0984945	0	0.128566	0.472367	0.52428	0.975715
HORVU0Hr1G018490	LC_u	undescribed protein	0	0	0	0	0	0	0
HORVU0Hr1G018500	LC_TE?	Aspartic proteinase nepenthesin-2	0	0	0.115835	0	0	0	0
HORVU0Hr1G018510	HC_G	Male gametophyte defective 1	302.655	312.7	326.716	435.592	585.963	642.092	682.755
HORVU0Hr1G018520	HC_G	Dolichyl-diphosphooligosaccharide--protein glycosyltransferase subunit 4A	0	0	0	0	0	0	0
HORVU0Hr1G018530	HC_U	unknown function	0	0	0.149581	0	0	0	0
HORVU0Hr1G018540	LC_u	undescribed protein	0	0.164046	0	0	0.241367	0	0
HORVU0Hr1G018550	LC_TE	unknown function	0	0.0338468	0	0	0	0	0
HORVU0Hr1G018560	HC_u	undescribed protein	0	0	0	0	0	0	0
HORVU0Hr1G018570	HC_U	unknown function	0	0	0	0	0	0	0
HORVU0Hr1G018590	HC_G	Leucine-rich repeat receptor-like protein kinase family protein	0	0.0108667	0.0988814	0.0553714	0.164719	0.930805	18.489
HORVU0Hr1G018600	LC_u	undescribed protein	0.613119	0.711792	1.2092	2.22781	1.16372	1.14812	1.25284
HORVU0Hr1G018610	LC_U	unknown function	0	0	0	0	0	0	0
HORVU0Hr1G018620	LC_TE	unknown function	0	0	0	0	0	0	0
HORVU0Hr1G018630	LC_U	unknown function	0	0	0	0	0	0	0
HORVU0Hr1G018640	LC_TE	Retrotransposon protein; putative; unclassified	0	0	0	0	0	0	0
HORVU0Hr1G018650	LC_TE	Gag-pol polyprotein	0	0.714015	0	0	0	0	0
HORVU0Hr1G018660	LC_u	undescribed protein	0	0	0	0	0	0	0
HORVU0Hr1G018670	HC_U	Protein of Unknown Function (DUF239)	0	0	0	0	0	0	0
HORVU0Hr1G018680	LC_U	Plant protein of unknown function (DUF247)	0	0	0	0	0	0	0
HORVU0Hr1G018690	HC_G	Disease resistance protein RPM1	0.0114766	0.0110231	0.0545071	0.28244	0.772302	0.964836	1.02439
HORVU0Hr1G018700	LC_u	undescribed protein	0	0	0	0	0	0	0
HORVU0Hr1G018710	HC_G	Disease resistance protein RGA2	0	0	0	0.0745968	0.287916	0.411369	0.317422
HORVU0Hr1G018720	LC_u	undescribed protein	0	0	0	0	0	0	0
HORVU0Hr1G018730	HC_G	MOB kinase activator-like 1A	0.0562477	0.114129	0.146917	0.139103	0.427573	1.5483	1.691
HORVU0Hr1G018740	x	x	11.932	9.23614	5.20982	5.72445	6.22532	6.75479	9.8684
HORVU0Hr1G018750	LC_u	undescribed protein	0	0	0	0	0	0	0
HORVU0Hr1G018760	LC_u	undescribed protein	0	0	0	0	0	0	0
HORVU0Hr1G018770	HC_G	glutamate receptor 3.3	0.0482037	0.0339028	0.0697161	0.105195	0.0786746	0.0333846	0.038906
HORVU0Hr1G018780	HC_TE?	General transcription factor 2-related zinc finger protein	0	0	0	0	0	0	0
HORVU0Hr1G018790	LC_TE	TTF-type zinc finger protein with HAT dimerisation domain	0	0	0	0	0	0	0
HORVU0Hr1G018800	HC_G	undescribed protein	0	0	0	0	0	0	0
HORVU0Hr1G018810	HC_G	undescribed protein	0	0	0	0	0	0	0
HORVU0Hr1G018820	HC_G	undescribed protein	0	0	0	0	0	0	0
HORVU0Hr1G018830	HC_G	Cell division protein FtsZ	21.1309	20.882	19.6366	21.53	23.8022	33.0213	48.8414
HORVU0Hr1G018840	HC_G	Acid beta-fructofuranosidase	0	0	0	0	0	0	0
HORVU0Hr1G018850	HC_G	Acid beta-fructofuranosidase	0	0	0	0.0431713	0	0	0
HORVU0Hr1G018860	LC_TE	Retrotransposon protein; putative; Ty1-copia subclass	0.0530224	0.00612067	0.0257623	0.248372	0.018479	0	0
HORVU0Hr1G018870	LC_TE	Retrotransposon protein; putative; Ty1-copia subclass	0	0.0737335	0.203487	0.00913983	0	0.0781417	0
HORVU0Hr1G018880	LC_TE	unknown function	0	0	0	0	0	0	0
HORVU0Hr1G018890	HC_G	sulfotransferase 17	4.36319	1.7997	2.03747	6.78344	33.9263	26.9992	8.6229
HORVU0Hr1G018900	LC_u	undescribed protein	0.413805	0	0	0	0	0	0.97967
HORVU0Hr1G018910	HC_G	undescribed protein	0	0	0	0	0	0	0
HORVU0Hr1G018920	LC_u	undescribed protein	0	0	0	0	0	0	0
HORVU0Hr1G018930	LC_u	undescribed protein	0	0	0	0	0	0	0
HORVU0Hr1G018940	HC_U	unknown function	0	0	0	0	0	0	0
HORVU0Hr1G018950	LC_TE	Transposon protein; putative; CACTA; En/Spm sub-class	0	0	0	0	0	0	0
HORVU0Hr1G018960	LC_u	undescribed protein	0	0	0	0	0	0	0
HORVU0Hr1G018970	HC_G	myb-like transcription factor family protein	0.143219	0.0996484	0.110307	0.0601055	0.372808	0.413278	0.552978
HORVU0Hr1G018980	HC_u	undescribed protein	0.215511	0.987541	1.42338	1.17938	1.07553	1.07738	1.30866
HORVU0Hr1G018990	LC_TE	hAT dimerisation domain-containing protein / transposase-related	0	0.233704	0.0202028	0	0	0	0
HORVU0Hr1G019000	LC_TE	unknown function	0.30949	0.695449	0.693824	1.09542	0.300939	0.525291	0.376159
HORVU0Hr1G019010	LC_TE	Endonuclease-reverse transcriptase	0	0.062925	0	0	0	0	0
HORVU0Hr1G019020	HC_G	sucrose synthase 1	0.049903	0.144314	2.03356	13.3348	34.3903	35.8309	66.3443
HORVU0Hr1G019030	LC_u	undescribed protein	0	0	0	0	0	0	0
HORVU0Hr1G019040	LC_u	undescribed protein	0	0	0	0	0	0	0
HORVU0Hr1G019050	HC_G	Sucrose synthase 1	0	0	0	0	0	0	0
HORVU0Hr1G019060	LC_U	unknown function	0	0.27332	0	0.142531	0.349085	0.125491	0.133236
HORVU0Hr1G019070	LC_u	undescribed protein	0	0	0	0	0	0	0
HORVU0Hr1G019080	LC_TE	Endonuclease-reverse transcriptase HmRTE-e01	0.0939482	0.434406	0.755614	1.05635	0.376715	0.472246	0.781141
HORVU0Hr1G019090	LC_TE	Retrotransposon protein; putative; unclassified	0	0	0	0	0	0	0
HORVU0Hr1G019100	LC_TE	Retrotransposon protein; putative; unclassified	0	0	0	0	0	0	0
HORVU0Hr1G019110	HC_u	undescribed protein	0	0	0	0	0	0	0
HORVU0Hr1G019120	HC_u	undescribed protein	0	0	0	0	0	0	0
HORVU0Hr1G019130	LC_U	unknown function	0	0	0	0	0	0	0
HORVU0Hr1G019140	LC_TE	Retrotransposon protein; putative; unclassified	0	0	0	0	0	0	0
HORVU0Hr1G019150	LC_u	undescribed protein	0	0	0	0	0	0	0
HORVU0Hr1G019160	LC_u	undescribed protein	0	0	0	0	0	0	0
HORVU0Hr1G019170	LC_TE	Retrotransposon protein; putative; unclassified	0	0	0	0.160127	0.0463373	0	0.0684788
HORVU0Hr1G019180	LC_TE	Transposon Ty1-BR Gag-Pol polyprotein	0	0	0	0	0	0	0
HORVU0Hr1G019190	LC_TE	undescribed protein	0	0	0	0	0	0	0
HORVU0Hr1G019200	LC_TE	Retrotransposon protein; putative; unclassified	0	0	0	0	0	0	0
HORVU0Hr1G019210	LC_u	undescribed protein	0	0	0	0	0	0	0
HORVU0Hr1G019220	LC_TE	Retrotransposon protein; putative; unclassified	0	0	0	0	0	0	0
HORVU0Hr1G019230	LC_u	undescribed protein	0	0	0	0	0	0	0
HORVU0Hr1G019240	LC_u	undescribed protein	0	0	0	0	0	0	0
HORVU0Hr1G019250	LC_u	undescribed protein	0	0	0	0	0	0	0
HORVU0Hr1G019260	LC_TE	unknown function	0	0	0	0	0	0	0
HORVU0Hr1G019270	LC_u	undescribed protein	0	0	0	0	0	0	0
HORVU0Hr1G019280	HC_G	LGC1	0	0	0	0	0	0	0
HORVU0Hr1G019290	LC_u	undescribed protein	0	0	0	0	0	0	0
HORVU0Hr1G019300	HC_G	Glutathione S-transferase family protein	1.2259	40.2563	16.6078	7.42632	4.11611	2.13591	0.892753
HORVU0Hr1G019310	LC_u	undescribed protein	0	0	0	0.181669	0	0	0
HORVU0Hr1G019320	LC_u	undescribed protein	0	0	0	0	0	0	0
HORVU0Hr1G019330	HC_TE?	Phosphatase YidA	0	0	0	0	0	0	0
HORVU0Hr1G019340	LC_TE	Retrotransposon protein; putative; Ty1-copia subclass; expressed	0	0	0	0	0	0	0
HORVU0Hr1G019350	HC_U	unknown function	0	0	0	0	0	1.11611	2.64731
HORVU0Hr1G019360	HC_U	unknown function	0	0	0	0	0	0	0
HORVU0Hr1G019370	HC_G	Protein kinase family protein	3.91422	4.54676	4.5741	4.78253	3.07124	2.85838	2.7935
HORVU0Hr1G019380	LC_u	undescribed protein	0	0	0	0	0	0	0
HORVU0Hr1G019390	HC_G	Protein kinase family protein	5.24052	4.27805	4.6548	4.2563	3.30581	2.60563	2.18323
HORVU0Hr1G019400	HC_G	BolA-like family protein	0	0	0	0	0	0	0
HORVU0Hr1G019410	HC_U	unknown protein; Has 22 Blast hits to 18 proteins in 9 species: Archae - 0; Bacteria - 0; Metazoa - 0; Fungi - 0; Plants - 22; Viruses - 0; Other Eukaryotes - 0 (source: NCBI BLink).	0.313305	0.357526	0.478458	0.768476	0.623498	0.704052	0.863331
HORVU0Hr1G019420	HC_G	GDSL esterase/lipase	0	0	0	0.0316	0	3.36e-07	0
HORVU0Hr1G019430	HC_G	Myosin heavy chain-related-like	0.012074	0	0	0	0	0	0
HORVU0Hr1G019440	LC_U	Chromosome 3B; genomic scaffold; cultivar Chinese Spring	0.0944385	0	0	0	0	0	0
HORVU0Hr1G019450	HC_G	RNA-binding protein; putative	0	0	0	0	0	0	0
HORVU0Hr1G019460	LC_u	undescribed protein	0	0	0.423986	0	0	0	0
HORVU0Hr1G019470	LC_U	unknown function	0	0	0	0	0	0	0
HORVU0Hr1G019480	LC_TE	unknown function	0	0.034963	0.179716	0.147901	0.0657995	0.0444037	0
HORVU0Hr1G019490	LC_TE	unknown function	0	0	0.0445588	0	0	0	0
HORVU0Hr1G019500	HC_G	HXXXD-type acyl-transferase family protein	0.14629	0.561588	3.71795	1.8857	3.0044	5.62489	5.48081
HORVU0Hr1G019510	LC_u	undescribed protein	0	0	0	0	0	0	0
HORVU0Hr1G019520	LC_u	undescribed protein	0	0	0	0	0	0	0
HORVU0Hr1G019530	HC_U	unknown function	0	0	0	0	0	0	0
HORVU0Hr1G019540	LC_u	undescribed protein	0	0	0	0	0	0	0
HORVU0Hr1G019550	LC_u	undescribed protein	0	0	0	0	0.320512	0	0
HORVU0Hr1G019560	HC_G	Flavin-containing monooxygenase	1.42237	0.884515	0.600846	0.746201	1.70761	1.67283	0.928602
HORVU0Hr1G019570	HC_G	Beta-1;3-N-acetylglucosaminyltransferase family protein	0	0	0	0	0	0	0
HORVU0Hr1G019580	LC_u	undescribed protein	0	0.183556	0	0	0	0	0
HORVU0Hr1G019590	HC_G	2-oxoglutarate (2OG) and Fe(II)-dependent oxygenase superfamily protein	0.350096	0.108483	0.0487988	0.140447	0.292826	0.171485	0.197165
HORVU0Hr1G019600	HC_G	Formin Homology 14	2.59866	9.5709	4.37149	3.72287	0.328617	1.88352	1.50964
HORVU0Hr1G019610	HC_G	pentatricopeptide repeat 336	4.5594	4.29024	8.93894	8.59325	5.60382	5.0456	5.34678
HORVU0Hr1G019620	HC_G	Pentatricopeptide repeat-containing protein	0.383619	0.72727	1.65698	2.84447	2.57141	2.43745	3.60698
HORVU0Hr1G019630	HC_G	UDP-Glycosyltransferase superfamily protein	0	0.00878113	0.0981023	0.0463922	0.282753	0.188724	0.172976
HORVU0Hr1G019640	HC_G	basic helix-loop-helix (bHLH) DNA-binding superfamily protein	0	0	0	0	0.35843	1.18448	0.792035
HORVU0Hr1G019650	HC_G	RING/U-box superfamily protein	0	0	0.0191784	0.0434913	0.232806	0.095335	0.114312
HORVU0Hr1G019660	HC_G	polymerase delta 4	0	0	0	0	0	0	0
HORVU0Hr1G019670	HC_U	unknown function	62.1877	81.044	42.6825	13.1524	15.02	9.53688	5.96566
HORVU0Hr1G019680	HC_G	alpha/beta-Hydrolases superfamily protein	0.772289	0.894762	0.996356	0.756478	4.50493	3.66724	1.79627
HORVU0Hr1G019690	HC_G	Tuliposide A-converting enzyme 1; chloroplastic	0.743393	0	0	0	0	0	0
HORVU0Hr1G019700	HC_G	alpha/beta-Hydrolases superfamily protein	0.814808	6.42214	17.0845	7.14957	23.5936	24.1077	14.2183
HORVU0Hr1G019710	HC_G	alpha/beta-Hydrolases superfamily protein	0.7378	0.345427	0.663499	0.685895	8.39616	12.5529	8.60576
HORVU0Hr1G019720	LC_u	undescribed protein	0	0	0	0	0	0	0
HORVU0Hr1G019730	LC_TE	RING/U-box protein with C6HC-type zinc finger domain	1.195	1.14098	0.894142	1.08382	1.11357	0.888031	0.757981
HORVU0Hr1G019740	LC_U	unknown function	0.0579215	0.846934	2.44833	0.578808	0.59389	1.59126	0.584326
HORVU0Hr1G019750	HC_G	Chaperone protein DnaJ	6.97292	6.89459	13.6753	26.82	15.2909	10.7482	10.7511
HORVU0Hr1G019760	HC_G	Glucan 1;3-beta-glucosidase A	0.376246	0.407489	0.577628	1.2871	1.0367	1.00374	1.00232
HORVU0Hr1G019770	HC_G	39S ribosomal protein L53/MRP-L53	7.04118	7.56735	12.197	10.3128	12.4864	9.87993	5.2561
HORVU0Hr1G019780	HC_G	Pentatricopeptide repeat-containing protein	1.19086	1.12387	2.1298	3.4968	2.21694	1.56925	1.29018
HORVU0Hr1G019790	LC_U	unknown function	10.3684	6.68466	14.7596	14.8638	9.7319	8.75121	9.89477
HORVU0Hr1G019800	HC_TE?	F-box/RNI-like superfamily protein	0	0	0	0.0399822	0.0393971	0.169576	0.353719
HORVU0Hr1G019810	LC_u	undescribed protein	0	0	0	0	0	0	0
HORVU0Hr1G019820	LC_u	undescribed protein	0	0	0	0	0	0	0
HORVU0Hr1G019830	HC_u	undescribed protein	1.18291	0	0	0.255276	0.0657695	0.202182	0.0647585
HORVU0Hr1G019840	HC_G	Cytochrome P450 superfamily protein	0.141835	0.261537	0.373848	0.305495	2.24783	1.85479	1.06806
HORVU0Hr1G019850	HC_G	Eukaryotic aspartyl protease family protein	2.2	5.96e-08	0	0	0	0	0
HORVU0Hr1G019860	LC_U	hypothetical protein chrM:11918-12241 FORWARD	0	0	0	0	0	0	0
HORVU0Hr1G019870	HC_U	hypothetical protein chrM:11918-12241 FORWARD	0	0	0	0	0	0	0
HORVU0Hr1G019880	x	x	65.8607	36.0412	8.51478	8.54593	4.84985	4.14513	2.96091
HORVU0Hr1G019890	x	x	30.3981	10.8472	1.95832	0.509223	0.592763	0.378511	0.081198
HORVU0Hr1G019900	LC_M	undescribed protein	8.0764	1.05718	0.77938	0.541916	0.450025	0	0
HORVU0Hr1G019910	LC_u	undescribed protein	183.631	42.9664	5.88573	6.70751	3.32571	2.60442	2.06506
HORVU0Hr1G019920	HC_G	ATP synthase subunit alpha; chloroplastic	0	0	0	0	0	0	0
HORVU0Hr1G019930	HC_G	NADH-ubiquinone oxidoreductase chain 1	30.3981	10.8472	1.95832	0.509223	0.592763	0.378511	0.081198
HORVU0Hr1G019940	HC_G	Sec-independent protein translocase protein TatC	8.90129	3.75972	0.869806	0.404997	0.173606	0.177112	0.0484196
HORVU0Hr1G019950	HC_G	ATP synthase subunit alpha	707.883	324.381	56.1573	26.3542	13.491	11.8274	7.44416
HORVU0Hr1G019960	x	x	65.8607	36.0412	8.51478	8.54593	4.84985	4.14513	2.96091
HORVU0Hr1G019970	LC_u	undescribed protein	0	0	0	0	0	0	0
HORVU0Hr1G019980	LC_U	BnaCnng12640D protein	2.06234	0	0	0.566985	0	0	0
HORVU0Hr1G019990	LC_u	undescribed protein	0	0	0	0	0	0	0
HORVU0Hr1G020000	x	x	0	0	0	0	0	0	0
HORVU0Hr1G020010	LC_u	undescribed protein	12.5504	14.8004	21.3216	28.3673	15.9571	15.3465	26.1145
HORVU0Hr1G020020	LC_u	undescribed protein	0	0	0	0	0	0	0
[truncated: 79,281 more rows]

## Sheet: ST1B
Supplemental Table 1B. Expression of protein-coding Arabidopsis genes over the germination time course (data from Narsai 2017). Given are the means of transcripts per million (TPM) values of the three biological replicates.
ID	0h	6h	12h	24h	48h
AT1G01010	1.82529	1.38684	1.23015	2.15733	5.89655
AT1G01020	4.87667	50.1202	42.5074	24.4732	16.0608
AT1G01030	0.457329	1.1282	2.47696	2.03618	2.30103
AT1G01040	0.913546	0.874542	1.66553	2.30897	3.93631
AT1G01050	12.967	25.6442	40.8601	92.3737	114.302
AT1G01060	0.592431	0.427054	1.32661	38.6398	30.4296
AT1G01070	0.0978154	0.0572361	0.31674	4.69455	8.10778
AT1G01080	2.97716	52.6981	79.3823	80.0892	67.4175
AT1G01090	2.10674	11.8687	28.5115	76.0259	120.997
AT1G01100	260.02	3372.75	3612.75	1992.65	936.595
AT1G01110	0.12865	1.92023	4.32129	3.99911	3.30226
AT1G01120	0.106362	0.852012	1.63329	17.1755	26.2849
AT1G01130	0.51282	3.77064	4.58316	11.8871	8.82888
AT1G01140	1.12411	3.80231	4.85135	26.8659	38.5648
AT1G01150	0	0	0	0.0433848	0.0482802
AT1G01160	81.004	51.8532	42.1126	50.9783	38.1972
AT1G01170	863.494	853.828	744.968	304.62	129.146
AT1G01180	9.9703	0.597743	0.946893	4.14965	4.80927
AT1G01190	0.250985	0.0369636	0.0303032	0.0371567	0.219395
AT1G01200	1.73044	5.08227	7.80646	4.41627	9.44882
AT1G01210	30.2452	285.991	171.84	120.295	43.1996
AT1G01220	0.621719	0.987753	2.34009	5.47095	11.9086
AT1G01225	0.318497	0.909023	3.18036	2.00785	3.34769
AT1G01230	53.2664	43.7979	44.5164	47.0059	46.9695
AT1G01240	100.039	14.7659	10.3538	2.12353	1.90049
AT1G01250	2.2551	0.404213	0.282332	0.28337	5.41441
AT1G01260	2.34803	2.76244	3.66137	7.5879	7.94894
AT1G01280	0.0236813	0	0	0.00602077	0
AT1G01290	1.6016	27.1082	26.6901	16.9305	11.7571
AT1G01300	14.6927	94.8057	180.289	159.638	140.751
AT1G01305	0.174171	0.162867	0.42946	0.233088	0.0996683
AT1G01310	1.80223	0.361873	0.251857	0.0440214	0.0646762
AT1G01320	2.69981	4.84464	17.0882	25.9532	40.7449
AT1G01335	0	0	0	0	0
AT1G01340	0.193384	0.162553	0.256556	1.32279	2.3143
AT1G01350	59.0811	40.1358	32.4682	25.0657	21.9939
AT1G01355	2.35935	0.45087	0.369327	0.155046	0.135295
AT1G01360	20.2456	7.66585	8.34799	7.79643	11.3706
AT1G01370	0.663657	6.91237	12.2719	22.908	14.0918
AT1G01380	0.647271	6.04693	20.038	89.4678	65.1284
AT1G01390	0.0444012	0.0175808	0.0646585	1.13259	4.716
AT1G01400	0	0	0	0	0.0203718
AT1G01410	0	0	0	0	0
AT1G01420	1.12278	0.046013	0.0256101	0.343958	3.48647
AT1G01430	0.288581	4.979	7.13458	11.9264	39.6068
AT1G01440	1.01363	1.33233	2.62656	4.0956	7.79721
AT1G01450	3.16238	0.818631	2.39152	2.02867	2.21164
AT1G01453	0.018488	0	0.0292076	0.797679	13.4217
AT1G01460	0.339825	0	0.0488028	0.00740247	0.0147615
AT1G01470	1524.85	32.5904	21.7204	35.5375	97.9275
AT1G01480	10.2221	0.156884	0.110232	0.140866	1.81456
AT1G01490	2.83542	10.8802	15.3483	53.3075	66.2587
AT1G01500	16.1533	2.74252	2.14833	4.15525	8.72634
AT1G01510	1.86875	3.85681	9.66841	18.0438	22.4907
AT1G01520	8.52042	3.00736	1.27477	2.92365	1.18449
AT1G01530	0	0.0136703	0.0179801	0	0.0295579
AT1G01540	1.41657	5.19462	9.15906	27.8689	38.612
AT1G01550	30.9121	17.3944	21.3958	43.9176	80.5495
AT1G01560	0.206522	0.00863503	0.0122761	0.180599	0.0891327
AT1G01570	0.0719863	0.282548	0.72324	0.876374	1.65209
AT1G01580	1.35866	0.13542	0.887187	2.22597	1.05961
AT1G01590	0	0.0116655	0.00511437	0.157761	0.0715094
AT1G01600	0.763039	1.65401	2.22909	25.3104	3.39071
AT1G01610	0.289436	2.30684	11.5249	33.0011	43.7977
AT1G01620	2.11489	16.448	40.7041	130.668	245.542
AT1G01630	0.437833	0.547497	2.00801	18.5838	78.3202
AT1G01640	3.18714	1.18242	1.94455	0.97487	2.92041
AT1G01650	21.1446	0.908883	1.82434	13.1023	21.2486
AT1G01660	0	0.00493073	0.00740143	0.0381417	4.1336
AT1G01670	0.0150204	0	0	0.0578591	0.435764
AT1G01680	0.078983	0.00918353	0	0.0922844	0.112048
AT1G01690	0.413328	1.0052	1.64715	5.09756	6.38871
AT1G01695	0.00819927	0.0801073	0.065954	0.187661	0.129597
AT1G01700	0.131228	0.209098	0.181146	0.289666	0.370896
AT1G01710	9.87811	4.34028	6.5159	10.3243	13.8564
AT1G01715	7.15959	23.8849	16.3824	12.6344	4.98838
AT1G01720	487.494	25.6808	25.3572	28.5131	24.5223
AT1G01725	78.4661	72.4978	41.571	23.7459	15.694
AT1G01730	42.561	9.17401	13.1561	31.3182	29.4827
AT1G01740	0.809978	3.5712	4.01191	4.31827	3.65275
AT1G01750	0.533074	1.08635	3.30591	57.1648	195.899
AT1G01760	0.242437	0.668152	2.1812	2.32103	2.58125
AT1G01770	2.48507	1.86247	4.12259	4.23207	7.22025
AT1G01780	3.61781	2.3943	8.46825	15.7773	47.9731
AT1G01790	0.137693	0.347698	1.07394	3.41993	8.80868
AT1G01800	39.7378	34.3944	51.4042	69.8791	94.9684
AT1G01810	5.21874	35.7265	15.8826	5.94784	2.62339
AT1G01820	73.0877	60.6073	53.0218	41.24	43.9036
AT1G01830	0.297797	0.7058	1.35386	3.76796	6.75528
AT1G01840	1.99838	14.1877	10.4875	6.20221	3.97158
AT1G01860	2.28154	2.26129	5.42124	9.60848	9.93418
AT1G01880	0.365567	0.551141	0.515457	0.842714	1.32665
AT1G01900	0.103962	0.0519101	0.0893842	0.894273	2.55764
AT1G01910	18.6348	14.3541	25.5044	46.511	48.0754
AT1G01920	5.85881	9.50753	11.8962	13.3495	10.6233
AT1G01930	10.2144	2.33015	4.32558	7.20295	7.95061
AT1G01940	14.9882	63.8062	67.3873	52.9306	29.2939
AT1G01950	0.643424	4.71625	5.77663	7.72083	10.519
AT1G01960	3.14084	1.83728	5.54808	10.8879	19.9831
AT1G01970	36.2373	11.7435	13.4895	17.4991	23.4026
AT1G01980	0.488375	0.0145911	0.0078371	0	0
AT1G01990	15.4198	15.3602	23.1	26.128	18.2422
AT1G02000	0.251767	0.489102	1.2506	6.13951	10.9998
AT1G02010	0.648397	0.443472	0.729454	1.77419	2.90455
AT1G02020	2.49625	1.14879	1.75305	3.097	4.4155
AT1G02030	0.0223195	0.0467304	0.0508791	0.33666	0.664463
AT1G02040	0	0	0	0.0888847	0.297244
AT1G02050	3.69522	2.89797	4.60625	5.33175	4.44994
AT1G02060	2.10045	1.07341	2.24274	2.3027	3.03371
AT1G02065	0	0.0097964	0	0.0364433	0.194011
AT1G02067	0	0	0	0	0
AT1G02070	0.114452	0.071756	0.268787	0.306529	0.244844
AT1G02080	4.33383	1.60003	4.26225	6.94037	10.7891
AT1G02090	31.4087	30.8254	31.2829	59.3949	52.3387
AT1G02100	16.7681	4.05835	9.99357	20.3828	21.9003
AT1G02110	3.88028	2.88498	8.23617	13.4164	14.3733
AT1G02120	12.108	2.47424	3.35552	5.76771	17.0251
AT1G02130	16.4308	29.3205	35.3168	65.1139	55.9776
AT1G02140	251.61	553.01	574.364	312.673	215.042
AT1G02145	4.03358	12.191	13.056	11.6884	11.4035
AT1G02150	31.931	40.0564	48.9076	65.1146	65.7819
AT1G02160	2.53288	22.2559	13.7987	11.5352	7.06361
AT1G02170	4.35771	2.38232	4.1203	14.7671	24.0253
AT1G02180	0.407078	5.64837	8.25467	17.3632	14.7281
AT1G02190	0.0207433	0	0.011631	0.246016	0.071731
AT1G02205	0.520231	0.27167	4.04118	102.919	54.6365
AT1G02210	0	0	0	0	0
AT1G02220	0.497465	0.158462	0.980911	4.92059	13.0624
AT1G02230	0.0486929	0.314303	0.728771	0.106348	0.336227
AT1G02250	0	0	0	0	0
AT1G02260	1.96063	2.02527	2.62509	5.41575	7.48378
AT1G02270	3.06684	4.98268	4.87385	7.22478	13.8889
AT1G02280	52.6001	221.329	276.562	176.91	122.048
AT1G02290	0.634952	5.42889	6.06835	7.89246	7.48103
AT1G02300	0.188804	0.388582	1.58338	3.93504	8.9261
AT1G02305	36.8323	45.3456	53.1697	56.7937	71.8424
AT1G02310	25.028	0.203799	0.0943747	0.174762	0.126819
AT1G02320	0	0	0	0	0
AT1G02330	16.7092	64.3241	50.0079	36.878	31.3835
AT1G02335	0.0196177	0.223989	0.427464	1.69683	12.7324
AT1G02340	0.145846	1.51721	7.36559	8.87108	6.21352
AT1G02350	0.473572	3.53952	4.2188	2.09142	1.35441
AT1G02360	0.162606	0.0668446	0.424082	24.466	29.3925
AT1G02370	3.92913	12.6984	9.50508	7.6691	4.29772
AT1G02380	32.3661	1.06765	1.96354	1.80735	6.65399
AT1G02390	0.0744331	1.03536	2.5041	3.01806	1.04888
AT1G02400	2.96569	0.103253	0.093719	1.44782	7.00707
AT1G02405	1.47277	1.48827	1.01666	0.539644	0.898176
AT1G02410	14.3056	29.516	34.1052	25.4148	26.0785
AT1G02420	1.12148	2.55957	2.01973	2.70936	3.08755
AT1G02430	0.589826	3.80573	2.65219	5.49887	3.16547
AT1G02440	0.112727	0.0556733	0	0.212253	0.0274239
AT1G02450	0.205904	12.0662	19.3624	2.71379	0.733253
AT1G02460	0.00708203	0.0110697	0.148655	1.24015	2.54852
AT1G02470	0.136168	0.39856	0.996999	3.96592	2.08531
AT1G02475	2.22448	18.9966	26.9923	24.5353	30.0949
AT1G02490	0	0	0	0	0
AT1G02500	2.24498	5.58045	21.927	127.252	318.435
AT1G02510	0	0.0425661	0	0	0.0245565
AT1G02520	0.0468123	0.0549664	0.151154	0.832614	2.06688
AT1G02530	0	0.00964877	0.0027047	0.0501854	0.0808459
AT1G02540	0	0	0	0	0
AT1G02550	0	0	0	0.0249068	0
AT1G02560	24.0496	91.7928	178.82	210.219	208.385
AT1G02570	0.0194442	0.0221566	0.0153592	0.346531	7.12633
AT1G02575	0	0	0	0.0328867	0.76928
AT1G02580	0	0.00755527	0.0059773	0.0126388	0.105165
AT1G02590	0	0	0	0	0
AT1G02610	11.4414	1.18772	1.54967	2.28766	1.63227
AT1G02620	0.205603	0.0438257	1.34723	5.85179	0.193915
AT1G02630	0.0127759	0	0.146469	0.90268	0.780726
AT1G02640	1.34614	20.9555	114.826	222.44	58.7846
AT1G02650	0.48794	0.150098	0.311002	0.489177	0.779707
AT1G02660	4.06992	0.247912	0.282303	0.811144	1.53709
AT1G02670	0.153046	0.0396513	0.0389637	0.466234	0.599815
AT1G02680	30.0889	37.8877	29.9848	20.6328	13.4249
AT1G02690	4.89976	4.05864	3.28184	11.8155	19.0551
AT1G02700	725.019	50.445	22.8129	17.9019	2.40691
AT1G02705	1.78449	0.230342	0.92173	6.70276	7.20188
AT1G02710	0.930062	0.0853993	1.25606	4.08932	5.47
AT1G02720	0.626912	4.01144	6.45379	12.7196	14.6272
AT1G02730	0.0346496	0.0388412	0.208325	2.99269	25.0788
AT1G02740	7.35984	9.53394	6.4003	6.67393	8.20205
AT1G02750	45.72	40.2203	27.6878	15.5911	16.6374
AT1G02770	12.7474	2.28335	2.88287	2.42091	1.78091
AT1G02780	258.155	1930.97	1956.84	2703.43	1918.59
AT1G02790	20.4302	0.130079	0.307827	0.149147	0.0859859
AT1G02800	0	0.0333502	0.0405134	0.166966	0.827679
AT1G02810	1.46445	4.52771	8.79215	13.4618	11.3701
AT1G02813	0.279003	0.115953	0.216476	0.177018	0.456692
AT1G02816	45.4582	58.5867	41.6205	39.9424	37.5315
AT1G02820	0.451199	0.943762	1.27888	0.397376	2.9306
AT1G02830	0	1.04261	0.385745	0.569591	0.352846
AT1G02840	52.5753	67.3426	70.9495	86.7864	83.203
AT1G02850	115.931	61.209	25.9525	20.7751	19.576
AT1G02860	3.40258	6.3253	8.612	14.6748	11.8902
AT1G02870	54.3389	223.882	233.405	105.861	42.6789
AT1G02880	11.0042	9.20767	14.4009	16.088	20.0753
AT1G02890	32.7975	3.42388	7.0692	12.0963	21.5002
AT1G02900	0.453442	2.80004	19.0164	39.2592	123.764
AT1G02910	8.78411	5.09964	9.68303	16.4725	25.2438
AT1G02920	3.22442	13.1525	11.921	213.675	113.363
AT1G02930	7.13768	21.1207	18.1742	289.541	407.475
AT1G02940	0	0.0218484	0.0324307	0.202811	4.21766
AT1G02950	0	0.0255749	0.203341	7.1053	1.62936
AT1G02960	6.39815	10.1095	9.12907	6.34236	5.92368
AT1G02965	0	0	0	0.026151	0.0260054
AT1G02970	0.0475146	0.163604	0.441448	3.7968	3.69937
AT1G02980	0.0989757	0.0389311	0.00965433	0.0402597	0.0721559
AT1G02990	1.37173	0.689344	1.26909	1.81955	3.34028
AT1G03000	1.07802	2.55842	6.15557	7.8355	8.98925
AT1G03010	0	0.00391887	0.00574393	0.055381	0.684804
AT1G03020	0	0	0	0	0
AT1G03030	48.6207	35.0844	21.3714	14.3985	16.6403
AT1G03040	8.92863	2.80063	6.79536	9.69951	16.5673
AT1G03050	0.40103	0.0041759	0	0	0.00471053
AT1G03055	0	0.176046	0.176029	1.87615	1.80754
AT1G03060	0.42733	0.193717	0.745878	1.39437	3.7878
AT1G03070	0.97265	0.103874	0.2922	0.415148	1.59791
AT1G03080	0.557301	1.38676	2.259	6.76559	14.9099
AT1G03090	9.02294	1.20019	2.4788	3.08127	7.43196
AT1G03100	0.46752	1.9302	2.08662	2.20745	1.56976
AT1G03103	1.34165	1.0706	0.837062	0.13875	0
AT1G03106	61.6947	41.7855	30.5484	12.5878	0.315536
AT1G03110	1.88408	13.8844	16.0878	26.6593	16.9951
AT1G03120	28.712	1.76243	1.19701	2.33897	1.4194
AT1G03130	6.55604	2.08899	7.58626	63.9845	250.262
AT1G03140	41.9359	19.4826	20.7998	27.3642	34.7818
AT1G03150	8.16518	98.5972	90.5048	53.4062	33.442
AT1G03160	1.81967	3.56186	7.72805	12.3004	16.7262
AT1G03165	0	1.19519	1.28712	0.303463	0.644599
AT1G03170	0	0.0292306	0	0.136887	0.373366
AT1G03180	3.42683	3.35219	5.21988	10.9112	10.143
AT1G03190	2.82549	3.01307	2.78738	3.90708	4.72679
AT1G03200	0	0	0	0	0
AT1G03210	5.48276	3.74154	3.18882	5.45066	9.82506
AT1G03220	40.8492	35.0633	53.7339	75.7082	77.7783
AT1G03230	14.3636	36.0597	43.678	85.7508	62.018
AT1G03240	0	0	0	0	0
AT1G03250	6.88394	10.7959	14.0281	21.4775	20.9899
AT1G03260	2.05818	2.4854	5.28124	8.98995	10.2876
AT1G03270	12.0666	2.51788	2.56877	2.40654	2.94532
AT1G03280	4.74508	7.57663	7.91626	12.6846	15.9109
AT1G03290	0.206082	0.947336	1.3925	4.24283	8.65331
AT1G03300	0.0553462	2.06878	1.75154	2.00714	1.94145
AT1G03310	0.40592	3.01947	3.40325	11.8716	29.5906
AT1G03320	0.0267358	0.447918	0.463294	2.05267	4.38725
AT1G03325	0	0	0	0	0
AT1G03330	98.4196	326.075	353.418	164.156	90.3965
AT1G03340	2.12049	6.66537	5.66042	2.08135	3.21006
AT1G03350	13.9215	7.66149	8.56378	24.1562	39.5914
AT1G03360	6.31786	45.1024	30.2479	28.9122	16.3246
AT1G03365	3.27734	1.6118	2.31468	4.71238	6.2219
AT1G03370	0.781857	0.369906	0.815158	3.11608	7.55932
AT1G03380	10.402	0.705488	1.8427	2.32565	6.95695
AT1G03390	0.155774	0.0066272	0	0.00676637	0
AT1G03395	0	0	0	0	0
AT1G03400	0.467416	0.0395873	0.122955	0.622361	0.414348
AT1G03410	0.0248606	0.268593	0.569144	1.64582	1.1679
AT1G03430	7.5825	14.4184	12.9392	14.8476	18.3026
AT1G03440	7.49327	1.1057	1.11955	1.23351	6.92789
AT1G03445	0.0283826	0.0034129	0.0288356	0.132798	0.664973
AT1G03457	0.0998548	0.493564	0.920775	3.42968	8.89725
AT1G03470	112.17	16.6442	7.05325	6.41304	10.9121
AT1G03475	16.3872	28.4156	54.9951	115.975	160.154
AT1G03490	0	0.0110928	0.0173759	0	0.0366594
AT1G03495	0.40145	5.45118	1.63109	1.14149	27.6419
AT1G03510	2.20178	3.28792	2.16983	2.39737	1.94756
AT1G03520	1.11287	2.74528	4.24848	3.91724	4.25692
AT1G03530	4.54794	3.505	4.30403	7.26225	7.01462
AT1G03540	0.189498	0.18729	0.349899	0.671659	0.998619
AT1G03550	2.57001	4.6002	4.53233	8.50398	7.77154
AT1G03560	0.698506	1.25472	1.58786	3.04492	4.60323
AT1G03590	3.07696	3.0034	5.9813	15.0566	18.9104
AT1G03600	51.8671	44.6603	94.2825	156.696	189.804
AT1G03610	19.2961	4.56061	10.9667	7.51263	6.60092
AT1G03620	0.793408	0.564346	0.766724	0.393849	0.389095
AT1G03630	1.69422	6.59054	26.6453	79.8555	168.828
AT1G03650	19.2471	54.2823	47.8647	19.0996	8.17645
AT1G03660	0	0.0596017	0.089467	0.611587	2.69898
AT1G03670	0.0320311	0.00404697	0.0059317	0.0297534	0.0439663
AT1G03680	18.8549	73.7507	107.892	130.731	170.389
AT1G03687	2.05902	8.14115	14.4547	19.7237	13.4008
AT1G03700	0	0	0	0	0.700614
AT1G03710	0.0934492	1.28149	0.460113	0.593369	0.258688
AT1G03720	0.0504646	0	0	0	0.0136861
AT1G03730	4.03481	24.736	19.8572	12.2138	17.4574
AT1G03740	0.886006	0.647034	1.01478	2.2461	7.07676
AT1G03750	1.6969	1.30857	1.62508	1.57048	2.16569
AT1G03760	30.7873	13.2939	10.5824	9.24006	7.10169
AT1G03770	26.8756	5.80567	5.1646	6.45981	5.28184
AT1G03780	0.094445	0.0406432	0.14245	1.66946	8.90852
AT1G03790	131.327	14.6384	18.0381	14.6415	1.83145
AT1G03800	0.0751577	0.0648564	0	0.542751	1.19587
AT1G03810	0	0	0	0	0
AT1G03820	0.0838555	0.831711	2.96544	1.20099	6.77259
AT1G03830	1.23599	1.17288	2.34858	4.13123	4.47684
AT1G03840	0.193533	0.426976	0.796652	1.8006	2.25824
AT1G03850	1.10707	26.5728	29.6974	21.2472	19.0609
AT1G03860	16.5026	148.881	221.363	178.256	125.603
AT1G03870	1.54872	0.926831	6.2518	326.876	264.417
AT1G03880	3380.51	331.701	99.4405	29.0871	18.78
AT1G03890	60.106	1.57033	1.69922	1.05133	0.856096
AT1G03900	39.0821	28.5672	50.3097	138.965	155.348
AT1G03905	13.6665	1.10925	1.68361	4.0387	9.34477
AT1G03910	26.4038	9.42012	12.1865	17.3431	22.279
AT1G03920	0.0947529	0.336775	0.42544	0.318737	2.68891
AT1G03930	3.00102	4.24386	5.95846	8.68536	13.1266
AT1G03940	0.703359	11.1213	4.04356	2.764	51.2439
AT1G03950	22.3889	14.7882	11.5837	8.10535	18.2956
AT1G03960	1.58019	2.64543	2.58692	3.40059	5.07103
AT1G03970	23.6403	8.39359	7.71014	7.87028	15.291
AT1G03980	0.120519	0.760074	1.26495	1.38729	0.831477
AT1G03982	0	0	0.0877537	0	0
AT1G03990	15.2922	0.553542	0.749966	0.862231	1.01858
AT1G04000	6.02388	2.40812	5.04083	13.5537	14.1441
AT1G04010	1.09041	0.552779	1.0621	2.75404	5.46814
AT1G04020	0.0336185	1.04102	2.37136	12.7112	10.7309
AT1G04030	1.67721	0.755778	1.09364	2.79256	4.56254
AT1G04040	1.96361	1.98989	6.58312	250.62	288.399
AT1G04050	0.21086	0.585259	0.591968	0.884763	1.43723
AT1G04070	16.2838	164.519	123.836	70.4921	28.8356
AT1G04080	9.50466	13.0171	23.7997	36.0244	33.2854
AT1G04090	0.0267333	0.0442028	0.0981919	0.346491	0.579607
AT1G04100	1.95249	0.641739	0.945069	1.60762	3.96864
AT1G04105	1.65528	0.429779	0.728409	1.85833	3.995
AT1G04110	0.0248545	0.664533	1.23213	2.7223	3.05391
AT1G04120	6.53745	2.06359	4.4193	12.3946	22.0994
AT1G04130	6.17186	8.45117	8.55143	13.532	9.5102
AT1G04140	9.1855	4.12921	11.5576	22.4343	32.3925
AT1G04150	0	0.0261585	0.0966737	0.098021	0.0776103
AT1G04160	0.104118	0.117481	0.349904	1.35728	4.60374
AT1G04170	30.3437	70.6376	91.1964	127.975	103.325
AT1G04180	0.0116265	0.0062658	0.138582	0.344081	1.00014
AT1G04190	15.4397	58.5444	60.426	63.7822	44.5527
AT1G04200	1.86615	0.777509	2.61256	7.86129	13.3073
AT1G04210	3.94935	6.33428	9.95549	14.0272	16.0293
AT1G04220	0.100728	0.646201	2.26997	21.3601	12.0088
AT1G04230	9.54022	8.7989	8.54656	7.71947	9.49961
AT1G04240	0.12016	0.273541	0.867578	2.59651	15.948
AT1G04250	0.208833	0.809756	5.0243	51.5054	177.076
AT1G04260	15.0282	11.7091	18.8256	34.9039	30.8534
AT1G04270	180.727	3612.03	3945.03	2044.17	1158.7
AT1G04280	0.655774	1.78548	3.62551	5.35248	23.8992
AT1G04290	13.6441	62.398	68.6904	56.6076	56.1865
AT1G04300	14.4821	2.30375	5.02796	7.89475	13.5494
AT1G04310	1.3917	0.588002	0.87154	3.12279	4.16623
AT1G04330	0.335981	0.637848	1.31577	0.884976	2.57356
AT1G04340	6.27538	90.2487	111.152	67.0501	41.5372
AT1G04350	3.88017	5.46682	3.91506	12.918	11.7856
AT1G04360	3.01425	0.377115	0.911872	2.79783	2.85879
AT1G04370	0	0	0	0.0650277	0.163307
AT1G04380	0.103569	0.199844	0.499476	0.436727	0.221863
AT1G04390	1.53114	1.27654	2.04457	2.10794	2.06064
AT1G04400	24.5029	13.9579	21.8365	22.1881	38.9444
AT1G04410	48.9506	500.393	892.504	966.751	1422.79
AT1G04420	1.92878	14.5923	31.7789	50.9585	60.9797
AT1G04430	0.657777	2.02824	7.57054	75.4763	108.503
AT1G04440	3.72862	2.91174	6.03824	11.7712	26.3787
AT1G04445	0.245925	0	0.0300587	0.0246371	0.30765
AT1G04450	0.0194909	0	0.0211188	0	0
AT1G04455	1.11961	4.86208	9.44656	7.69647	5.99103
AT1G04470	0.110134	0	0.00384447	0	0
AT1G04480	111.194	1754.98	1903.21	1187.04	643.522
AT1G04490	0.119786	0.384983	1.97782	1.109	0.849991
AT1G04500	0.0586296	0	0.0116253	0	0.0765679
AT1G04510	16.1232	12.6517	24.258	42.6425	39.0936
AT1G04520	0.318503	23.9195	38.4041	62.9041	42.8255
AT1G04530	42.8776	36.206	34.8014	27.8608	25.0224
AT1G04540	0.361991	0.067898	0.281403	2.33447	3.69269
AT1G04550	3.84438	21.4062	17.9735	18.1896	22.5644
AT1G04555	8.88811	11.9682	17.4164	14.9563	13.8225
AT1G04560	9795.47	307.72	183.276	85.7032	24.2683
AT1G04570	0.560725	0.529426	0.466776	0.510058	0.375471
AT1G04580	0.054972	0.200766	0.263483	0.179318	0.0863001
AT1G04590	23.6167	25.2971	22.675	26.8883	21.2701
AT1G04600	0.0460186	0.0242999	0.0587032	0.0416331	0.151266
AT1G04610	0.0242212	0.185667	1.1418	1.98432	5.05679
AT1G04620	4.2428	7.31723	10.3944	9.70753	17.4976
AT1G04625	0.24112	0.134666	0.0559413	0.0918303	0.0576543
AT1G04630	14.4341	28.4991	49.9977	118.787	108.213
AT1G04635	11.2349	108.344	62.2351	23.2672	9.00217
AT1G04640	11.1423	26.8031	36.4832	29.4891	30.705
AT1G04645	0	0	0.281654	0	0
AT1G04650	0.489742	0.312004	0.312221	1.463	1.47845
AT1G04660	5.05591	6.82331	7.16946	23.5603	7.12826
AT1G04670	0.0681617	0.086445	0	0	0.088511
AT1G04680	0.227047	0.345227	2.62213	21.9123	52.0359
AT1G04690	35.4452	34.9935	48.2641	95.6865	96.3597
AT1G04700	0.0588965	0.112261	0.305875	0.651429	3.62433
AT1G04710	4.82925	8.75796	12.3807	22.5348	22.2401
AT1G04730	0.0608285	0.824347	1.1051	4.14398	4.18397
AT1G04750	49.9663	126.447	184.932	156.763	155.645
AT1G04760	0.0267358	0.0592828	0.183442	1.83743	4.28209
AT1G04770	2.71332	87.513	115.397	25.2472	22.5662
AT1G04778	0	0	0	0	0
AT1G04780	3.00649	4.65822	8.15636	12.1053	15.8793
AT1G04790	5.41028	5.17797	6.97694	9.90891	10.8784
AT1G04800	0.941115	0.254729	0.766062	0.26321	106.935
AT1G04810	8.79525	5.01413	12.5829	18.3962	22.0493
AT1G04820	2.84172	11.0429	82.0314	490.534	645.229
AT1G04830	26.73	6.70275	8.10668	8.82327	8.46841
AT1G04840	0.241401	0.457837	0.69733	0.969864	0.986891
AT1G04850	32.6019	36.1059	43.404	91.6041	118.845
AT1G04860	4.03219	3.14612	6.5179	8.8551	11.1335
AT1G04870	13.2846	57.3321	53.3162	51.4525	32.7711
AT1G04880	0.0315114	0.26147	0.308135	0.558335	0.362989
AT1G04890	0.0087211	0	0	0	0
AT1G04895	0	0	0	0	0
AT1G04900	1.52279	19.2447	25.6207	20.4271	11.0754
AT1G04910	8.89541	6.34824	8.6056	22.7409	24.2974
AT1G04920	5.61644	1.16419	3.21637	3.19807	0.594894
AT1G04930	1.13678	2.71213	4.01657	6.76377	3.94702
AT1G04940	7.84822	105.747	167.729	125.261	102.614
AT1G04945	4.58003	16.6845	11.5399	9.49448	5.22549
AT1G04950	8.22455	4.65353	6.16266	8.4767	9.59089
AT1G04960	9.87898	10.9613	11.3212	13.7351	18.7863
AT1G04970	8.92964	6.2419	8.94959	12.3156	18.8108
AT1G04980	0.610692	8.33344	19.1885	36.6105	30.7072
AT1G04985	28.7148	33.1951	37.8597	31.3753	23.5359
AT1G04990	2.0695	0.474173	2.54868	7.47908	26.4756
AT1G05000	0.627105	3.06396	10.0952	13.8486	25.1619
AT1G05005	0	0	0	0	0.0310992
AT1G05010	2.05865	0.536657	0.846197	15.2242	91.4923
AT1G05020	0.132475	0.0492123	0.0300346	0.385545	2.24105
AT1G05030	2.43564	1.08473	1.62696	2.66214	4.12198
AT1G05035	0	0	0	0	0
AT1G05040	0	0.052096	0	0	0.0249721
AT1G05055	5.50536	10.7566	12.4139	14.6466	14.587
AT1G05060	44.0178	7.92064	7.81159	6.97403	10.5299
AT1G05065	0.627558	12.1215	21.861	5.00548	7.13926
AT1G05070	8.98082	44.1344	43.5371	43.3732	28.7342
AT1G05080	0.0110664	0.0826781	0.00874143	0.0067652	0
AT1G05085	0	0	0	0	0
AT1G05087	1.27731	0.133437	0.563294	1.37858	2.3039
AT1G05090	1.81966	3.35908	3.73589	4.14261	4.11218
AT1G05100	0.481994	0	0.0238712	0.339155	0.609747
AT1G05120	6.12013	1.56813	2.23023	3.66204	6.4599
AT1G05136	0	0	0	0	0
AT1G05140	4.89831	15.363	20.2165	18.3517	22.174
AT1G05150	11.8421	5.75693	8.30681	15.4061	21.4352
AT1G05160	2.7372	6.91428	11.0557	6.54064	4.60177
AT1G05170	8.43427	5.26809	13.9423	12.2449	9.0735
AT1G05180	8.45317	21.1721	28.2487	27.4153	25.0741
AT1G05190	9.17038	317.994	528.883	439.581	526.299
AT1G05200	0.0201932	0.0666906	0.382274	0.477068	3.13112
AT1G05205	12.6201	151.511	220.55	254.148	154.108
AT1G05210	0.354925	5.34952	15.2735	32.041	28.4455
AT1G05220	0.0475467	0.185339	1.17655	3.87268	3.10677
AT1G05230	1.28064	1.95445	5.31887	7.55259	11.5925
AT1G05240	0.486382	0.247772	1.6786	12.0906	268.026
AT1G05250	0.486382	0.247772	1.6786	12.0906	268.026
AT1G05260	0.194649	0.0763046	1.47029	12.1376	165.144
AT1G05270	41.0957	26.6007	28.7577	26.6584	30.0078
AT1G05280	0.0265111	0.0357102	0.283202	2.66761	2.24724
AT1G05290	0	0	0	0	0
AT1G05291	0	0	0	0	0
AT1G05300	0.440397	0.736696	2.532	7.19129	8.93555
AT1G05310	0.0504105	0.0151584	0.137639	0.25577	1.63978
AT1G05320	0.111054	0.508382	3.42124	7.74995	17.5863
AT1G05330	2.1819	2.54579	8.29814	0.670647	0.184929
AT1G05340	440.723	13.2304	15.4498	5.03016	9.53597
AT1G05350	0.622813	3.01529	8.50341	27.5484	27.7051
AT1G05360	1.75069	9.79301	14.7015	14.546	12.0327
AT1G05370	0.059888	0.0830272	0.205176	0.343583	0.6859
AT1G05380	6.40011	1.56022	2.93061	4.35179	8.10938
AT1G05385	5.68894	13.8107	19.3957	24.2178	12.7737
AT1G05400	2.1246	5.54219	3.18201	1.91823	0.898138
AT1G05410	12.1667	14.6292	12.0755	12.4732	10.6709
AT1G05420	0.302191	0	0.0184889	0.833979	1.7139
AT1G05430	12.5777	60.6657	61.9844	45.4289	39.5891
AT1G05440	0.0218201	0.0075792	0.043898	1.02937	3.65418
AT1G05450	0.0618347	0	0	0.132852	0.397605
AT1G05460	0.996487	0.906604	1.35351	2.18017	3.96527
AT1G05470	0.0578935	0.526966	1.16001	1.1702	2.53557
AT1G05490	0.0161926	0.00331463	0.0162417	0.0473564	0.266404
AT1G05500	23.2814	15.4372	17.0486	23.4851	39.2042
AT1G05510	4240.25	56.0704	64.008	22.4211	14.2403
AT1G05520	2.52422	3.27057	6.10352	18.3262	25.0044
AT1G05530	0.0115585	0	0.0452958	0.358331	1.32133
AT1G05540	0	0	0	0.0584652	0.325043
AT1G05550	0	0	0	0	0.00893377
AT1G05560	55.2027	7.60722	4.55898	3.33652	8.04654
AT1G05570	0.0844697	1.597	6.7598	5.81586	11.908
AT1G05575	0.62837	1.83958	2.97898	7.22699	5.47193
AT1G05577	0.0134842	0.0324663	0.148784	0.185911	0.204459
AT1G05580	0.36064	0	0.0405351	0.00864218	0
AT1G05590	0.166417	0.784224	2.03379	7.64164	12.0293
AT1G05600	1.56569	8.01469	8.33507	5.02461	3.80617
AT1G05610	0	0.0062932	0.160971	0.152828	0.0771005
AT1G05615	0	0	0	0	0
AT1G05620	1.59906	3.83214	13.9472	54.2041	81.1045
AT1G05630	0.025831	0.114467	0.262517	2.02164	5.80277
AT1G05640	0.131204	1.91412	1.80739	2.562	3.13332
AT1G05650	0	0	0	0.556125	3.365
AT1G05660	0.0217538	0	0.0113423	1.29495	9.14735
AT1G05670	0.564339	1.0716	1.24907	1.69497	1.94544
AT1G05675	0.091059	0	0.037104	0.178713	0.099882
AT1G05680	62.0513	5.74102	4.12694	3.65429	4.23209
AT1G05690	7.41735	0.48812	0.618704	0.905013	0.822088
AT1G05700	0.0243634	0	0	0.451977	0.72917
AT1G05710	7.19042	14.9969	8.05878	4.61206	13.9663
AT1G05720	14.0997	52.8607	68.4145	57.2013	53.4277
AT1G05730	20.5333	83.989	44.9615	17.2087	5.81978
AT1G05740	0.461987	1.13416	0.531726	0.282974	0.273512
AT1G05750	1.65564	1.15037	1.8661	2.60248	2.73676
AT1G05760	0.274666	0.618225	0.754753	17.7829	2.09406
AT1G05770	0.0727773	0.0220969	0	2.4111	0.186243
AT1G05780	26.4726	37.2351	45.7144	35.2574	20.14
AT1G05783	0.0905503	0.114839	0.153158	0	0.0618587
AT1G05785	9.3984	12.5618	13.8157	7.66373	6.77437
AT1G05790	7.31573	2.20211	2.90377	5.31498	8.42268
AT1G05800	0	0	0	0	0
AT1G05805	0.0291109	0.560787	1.84392	5.26918	10.5696
AT1G05810	5.73256	2.61686	11.4784	28.9569	41.6029
AT1G05820	0.469723	0.057595	0.201804	0.738377	0.926646
AT1G05830	0.919599	1.01893	2.08539	3.76875	5.67112
AT1G05835	0.743492	1.63493	2.38609	18.9797	13.9008
AT1G05840	11.6772	8.70068	9.47335	6.15722	7.03831
AT1G05850	13.0235	14.4385	42.8361	183.276	453.635
AT1G05860	4.23834	3.76332	4.08545	7.01859	7.94479
AT1G05870	3.00327	10.7228	20.1633	50.0992	64.0148
AT1G05880	0	0	0	0.0712577	0.0197499
AT1G05890	35.0941	7.42767	13.5298	16.1516	18.3443
AT1G05894	1.74889	0.16628	0.143702	0.171001	0.938885
AT1G05900	2.08782	5.04615	5.05614	4.15243	5.82545
AT1G05910	1.59003	2.05367	3.90225	6.68956	8.07471
AT1G05920	0.0120745	0	0	0	0
AT1G05930	0	0	0	0	0
AT1G05940	6.52881	6.06281	7.91665	12.149	21.2966
AT1G05950	0.048231	1.03615	0.885491	2.96744	3.93054
AT1G05960	6.37635	2.66458	5.91131	12.9119	26.4174
AT1G05970	4.69701	9.14886	9.66106	8.98776	6.57672
AT1G05990	0	0	0.0385793	0.501978	7.436
AT1G06000	2.33519	1.77486	8.1704	80.7401	249.638
AT1G06010	120.11	170.945	129.796	100.582	69.3736
AT1G06020	0.27837	0.0706246	0.0366887	0.13709	0.361117
AT1G06030	0	0.0094189	0	0.118994	1.52728
AT1G06040	3.13168	19.9832	42.992	119.043	120.541
AT1G06045	2.30368	15.3975	40.7025	81.4818	91.9313
AT1G06050	0.68146	2.82357	3.24937	3.15321	4.37427
AT1G06060	8.84779	3.83132	8.86988	18.6828	21.1091
AT1G06070	6.19788	7.97958	12.0697	19.2137	13.4547
AT1G06080	0.418481	32.2759	88.8642	66.1956	11.5371
AT1G06090	0.0434103	0.0257763	0.288449	4.15387	31.44
AT1G06100	0.0192629	0.215748	2.38247	0.641939	0.0783384
AT1G06110	121.583	22.6828	28.9885	18.088	16.4882
AT1G06120	0.00645063	0.0151481	0.0159537	0.128959	3.57008
AT1G06130	26.0096	15.4133	22.2566	15.6119	15.6283
AT1G06135	0	0	0	0.528903	0
AT1G06137	0	0	0	0.293385	0
AT1G06140	0.228835	0.531562	0.666038	0.755459	0.769158
AT1G06143	0.448963	2.00865	1.58456	2.78902	2.25029
AT1G06148	0	0.14124	0	0	0
AT1G06150	0.977874	1.85508	2.06956	4.08958	8.78743
AT1G06160	0	0.301245	0.0757108	0.0149845	1.25869
AT1G06170	0	0.0070022	0.0497661	0.0390684	0.0852449
AT1G06180	0.445444	2.93865	4.00812	8.49575	12.3132
AT1G06190	24.2834	38.4969	57.139	106.981	108.055
AT1G06200	116.822	84.8676	76.828	66.1356	60.7064
AT1G06210	46.3075	18.1431	17.8177	29.8505	28.4536
AT1G06220	11.0033	6.97711	13.525	23.9109	29.6721
AT1G06225	0	0	0	0	0
AT1G06230	11.9441	2.06193	5.58173	8.12345	12.9997
AT1G06240	0.564647	1.11937	2.73368	6.52457	7.68387
AT1G06250	0.823943	0.27787	0.602707	1.12138	0.860017
AT1G06260	0.892312	0.522836	0.916915	0.620103	0.772882
AT1G06270	2.2032	3.04058	6.07568	7.60488	4.24704
AT1G06280	0	0	0.102255	0	0
AT1G06290	60.3102	33.0206	91.4162	137.322	130.705
AT1G06310	0.0473005	0.0763818	0.318453	0.62861	0.621402
AT1G06320	0.208598	0.833419	0.679081	1.53121	2.28442
AT1G06330	0	0	0.0385793	1.27444	2.81232
AT1G06340	0	0	0.0475687	0	0.647792
AT1G06350	0.107474	0.837505	11.0367	27.9955	18.9838
AT1G06360	0.236084	3.31511	30.9694	39.2752	57.8522
AT1G06380	4.9811	25.1216	19.7335	24.7592	13.7555
AT1G06390	7.21313	18.1561	43.2713	37.9227	40.3505
AT1G06400	255.934	140.07	96.5741	82.7765	82.4863
AT1G06410	2.9533	4.1422	6.88821	14.1411	30.1574
AT1G06420	0.028915	0.233189	0.867892	1.01746	2.58461
AT1G06430	17.0427	2.41924	3.86417	11.9649	21.7316
AT1G06440	0.730564	1.95979	3.35373	3.57379	2.46354
AT1G06450	2.78351	2.85171	5.29399	6.46251	4.74879
AT1G06460	4.93313	2.88844	4.34857	5.81216	25.1277
AT1G06470	1.41245	4.4615	7.6135	17.6552	18.0188
AT1G06475	0.311128	18.5657	20.3267	33.7337	25.6781
AT1G06490	0.0206522	0.122228	0.31547	0.483255	0.518648
AT1G06500	8.3614	26.0307	20.2664	18.3281	13.6252
AT1G06510	3.64117	18.0804	29.4347	17.2903	13.0775
AT1G06515	1.63081	16.061	19.4715	11.1524	3.99811
AT1G06520	2.38071	1.25088	2.12391	2.52043	0.194355
AT1G06530	19.6607	36.1676	35.6652	49.7919	57.0088
AT1G06540	0.359484	0.043947	0	0.216842	2.55219
AT1G06550	0.598208	3.966	6.24791	25.5559	103.33
AT1G06560	2.3411	4.10709	8.2974	11.8871	9.04297
AT1G06570	31.6224	2.07157	3.18985	7.61669	13.7923
AT1G06580	0.129663	0.616204	0.845983	0.854932	0.791376
AT1G06590	1.00724	2.74759	3.5087	3.87416	3.66415
AT1G06620	0.0928548	0.0397355	0.662979	13.0555	27.5044
AT1G06630	15.1134	5.83317	4.92696	6.61539	6.23425
AT1G06640	1.57031	1.03668	2.05738	15.8111	125.051
AT1G06645	17.0197	3.3134	8.41535	4.08949	3.43117
AT1G06650	9.09896	4.90333	8.81662	17.6508	21.6451
AT1G06660	0.0732592	0.017031	0.189056	2.81508	7.23292
AT1G06670	1.70215	3.12993	5.8036	9.34584	10.9289
AT1G06680	12.6056	19.0601	81.688	316.187	921.072
AT1G06690	6.48351	1.44024	3.28711	15.654	29.4177
AT1G06700	22.3517	39.459	61.6481	52.1591	58.526
AT1G06710	0.440506	1.17027	1.24025	1.46369	1.45346
AT1G06720	4.16361	10.7453	10.4107	11.7082	9.93719
AT1G06730	2.88109	2.37644	4.89799	9.13027	10.0497
AT1G06740	0.630668	1.41333	1.91492	2.15132	1.48184
AT1G06750	0.100461	0.020205	0.0615899	0.0280859	0.0239879
AT1G06760	28.6579	15.6936	59.8609	207.284	199.72
AT1G06770	2.45655	11.1234	10.5436	6.35028	4.4836
AT1G06780	0.824067	2.2221	2.51548	6.31039	10.5719
AT1G06790	6.89969	35.3266	29.0919	37.4699	17.224
AT1G06800	2.34832	1.95014	2.02741	8.45033	10.3075
AT1G06810	0.19808	0.126515	0.0511773	0.0576761	0.0206699
AT1G06820	2.29445	9.41023	11.3088	14.0588	17.2494
AT1G06830	0	0	0	0.364671	11.2451
AT1G06840	0.544077	1.1964	1.70297	3.33083	8.15301
AT1G06850	0.0982167	1.12295	3.60266	10.6827	18.4143
AT1G06870	0.808827	2.63342	4.84009	17.9798	20.1696
AT1G06890	24.8454	10.9467	26.7944	52.9397	65.6257
AT1G06900	2.76703	5.69804	11.6285	13.9329	16.9001
AT1G06910	2.79375	6.16578	4.42969	3.28441	3.17334
AT1G06920	0	0	0	0.0283475	0.480769
AT1G06923	0.125516	0.045019	0.0312075	1.51016	25.5246
AT1G06925	3.20478	7.23093	4.52278	2.93921	1.21655
AT1G06930	0.043419	0.0492503	0.166445	9.0701	5.65742
AT1G06950	13.731	15.9468	32.9367	59.5189	64.3384
AT1G06960	6.14497	13.9378	21.9689	16.5664	12.2589
AT1G06970	0.0541436	0.00291821	0.0322714	0.0975562	0.178151
AT1G06980	0.039889	1.34783	1.8054	2.50752	4.70329
AT1G06990	0	0.008428	0.0379533	0.0320907	0
AT1G07000	0.095075	0.123602	0.389461	2.68459	9.76946
AT1G07010	0.326837	1.0416	1.94637	11.7124	20.4288
AT1G07020	7.79336	69.2906	82.8113	62.2632	36.513
AT1G07025	0.0410777	0	0	0	0
AT1G07030	20.7408	11.2769	13.6875	27.5469	22.367
AT1G07040	17.4143	2.51657	4.79491	9.70849	19.1479
AT1G07050	0.59202	0.145207	0.614483	2.1993	9.39175
AT1G07060	0.676795	0.300555	0.176289	0.491655	0.531133
AT1G07070	6.51374	258.986	319.349	188.303	76.459
AT1G07080	181.173	66.8231	136.532	169.809	121.532
AT1G07090	1.73201	3.32568	3.08788	6.34533	17.5616
AT1G07110	10.4648	4.25233	9.6837	15.2144	21.0708
AT1G07120	1.99417	1.39674	1.37615	2.65846	2.20739
AT1G07130	10.3639	7.1638	11.5883	16.2837	13.3644
AT1G07135	0.985199	0.222074	0.384131	4.23216	4.17899
AT1G07140	51.271	130.629	144.403	283.346	288.617
AT1G07150	30.4877	0.832956	2.56107	4.91418	7.24437
AT1G07160	0.170885	0.0390923	0.134621	1.66391	2.01432
AT1G07170	63.9944	74.0766	91.0453	65.272	32.1615
AT1G07175	0	0	0	0.707593	2.76249
AT1G07180	6.34683	0.853636	0.492495	2.24973	2.19781
AT1G07190	0	0	0	0	0
AT1G07200	0.443437	0.704295	1.43395	2.06443	6.56571
AT1G07210	10.5524	86.2936	91.5313	84.3241	58.7768
AT1G07220	3.2216	4.05302	6.02614	7.47959	6.93188
AT1G07230	6.32104	3.83568	5.6262	7.60602	11.7559
AT1G07240	3.78956	2.35229	3.12556	7.72482	16.4464
AT1G07250	15.635	3.70131	4.00537	11.2007	18.0038
AT1G07260	0.859294	2.11092	2.91652	6.66335	9.82533
AT1G07270	0.0375691	0.473411	0.844024	2.26481	1.45247
AT1G07280	0.62169	1.69674	3.50274	8.12985	9.07559
AT1G07290	0.042975	0.968713	1.1934	4.34514	4.10777
AT1G07300	2.3189	0.56755	1.33522	1.16416	3.03332
AT1G07310	25.4936	2.41105	5.25298	10.6573	22.8578
AT1G07320	15.7542	76.0605	124.158	274.271	316.672
AT1G07330	0.0382689	0.0561964	0.057426	0.0428576	0.0242853
AT1G07340	0.158978	0.0275731	0.101106	0.0240608	0
AT1G07350	33.6367	15.1523	21.584	58.2733	53.3992
AT1G07360	18.0316	5.58286	12.8215	29.5692	30.3165
AT1G07370	0.35367	21.101	34.3877	94.5968	48.2523
AT1G07380	1.34342	2.7051	3.51198	4.51907	6.844
AT1G07390	0.387094	0.66845	1.20879	0.911044	1.0565
AT1G07400	22.6336	9.54774	4.12465	7.29324	5.57472
AT1G07410	0.776278	2.24838	7.14814	18.5906	10.8796
AT1G07420	5.3222	5.23795	6.22009	20.681	32.7121
AT1G07430	6.03613	1.45946	1.36357	0.911913	0.800578
AT1G07440	2.29075	26.9467	39.4183	48.226	65.2888
AT1G07450	0.0154859	0.011448	0.07389	0.10282	1.43488
AT1G07460	0	0	0	0	0
AT1G07470	18.9915	5.94307	8.4089	14.3533	18.7335
AT1G07473	26.4255	0.779603	0.833809	0.2796	0.226297
AT1G07476	0.0612834	0.0415775	0	0.081052	0.0242133
AT1G07480	20.5646	4.00045	5.19012	9.60078	13.8246
AT1G07485	0	0.151234	1.03129	1.36176	5.48971
AT1G07490	0.0992417	0	0.246251	0.998505	5.3203
AT1G07500	540.084	6.04562	7.78849	3.08846	3.34925
AT1G07510	13.3558	2.28568	4.51863	9.98366	15.6782
AT1G07520	0.697776	0.899948	1.51857	3.4206	4.44465
AT1G07530	58.5371	4.07668	5.48167	7.45002	10.8946
AT1G07540	0.245646	0	0.00578463	0.00779257	0.00500277
AT1G07550	0	0.00279032	0	0	0
AT1G07560	0.00374173	0.00276608	0	0	0.0544005
AT1G07570	6.51519	13.612	16.8304	16.7912	17.7469
AT1G07590	4.00008	6.29156	4.56141	3.00783	2.4
AT1G07600	0	0	0	0	0
AT1G07610	0	0	0	0	0
AT1G07615	7.28969	4.32036	5.64015	8.74757	7.26512
AT1G07620	0.0432662	0.0891879	1.5635	2.77029	2.32401
AT1G07630	0.879447	2.27931	3.28387	7.85746	10.9719
AT1G07640	0.0989192	1.90838	4.36034	5.15468	7.00995
AT1G07645	2049.16	171.627	73.766	12.9932	6.25457
AT1G07650	0.335016	1.12795	1.19271	3.08538	8.71044
AT1G07660	46.8641	105.138	86.2893	90.9375	64.1038
AT1G07670	3.4461	3.43376	8.26515	25.9242	31.9124
AT1G07680	0	0	0.0807027	0.419999	2.48738
AT1G07690	0.057168	0.0678635	0.305826	5.69909	6.33046
AT1G07700	8.19746	11.2968	12.8193	20.5238	24.6636
AT1G07705	1.10902	5.0061	7.00016	9.89189	11.8579
AT1G07710	0.394681	0.0575751	0.207479	0.83151	1.01698
AT1G07720	0.0825189	0.21305	0.518763	13.625	16.9765
AT1G07725	7.09598	1.47476	2.63034	4.14241	6.06151
AT1G07730	3.0189	1.56024	1.7378	2.47371	9.62534
AT1G07740	2.24564	1.04148	1.72649	2.74154	2.54045
AT1G07745	6.4673	4.25944	5.58436	4.42949	3.45908
AT1G07747	0	0	0	0	0.095056
AT1G07750	6.10147	2.4241	3.28054	6.12404	25.9998
AT1G07770	86.0814	1957.27	2504.3	1428.19	708.557
AT1G07780	2.80234	39.4446	25.4215	37.5799	22.2602
AT1G07790	13.6901	155.605	211.356	272.49	179.36
AT1G07795	0.114478	0.089468	0	3.58175	5.55297
AT1G07810	1.79596	2.46432	8.02983	16.759	21.3327
AT1G07820	49.6812	219.477	257.901	354.058	248.06
AT1G07830	27.5512	182.179	129.096	70.3184	33.1427
AT1G07840	21.2158	24.6506	20.582	30.3032	20.5316
AT1G07850	0.0767811	0.00468507	0	0.00562837	0.0330823
AT1G07860	0	0	0	0	0
AT1G07870	2.85845	1.23541	1.16487	2.40858	5.77265
AT1G07880	0	0.0224601	0.0109733	0.0757345	2.46366
AT1G07885	0	0	0	0	0
AT1G07890	6.14105	32.5929	94.3383	757.152	1339.11
AT1G07900	0.036105	0	0	0	0.0908864
AT1G07901	0	0	0	0	0
AT1G07902	3.50972	17.7501	21.0581	8.73319	6.06803
AT1G07910	4.2241	1.1525	2.06757	3.54475	4.89403
AT1G07920	74.8069	129.019	310.009	598.405	545.98
AT1G07930	48.1382	140.445	336.83	659.812	474.414
AT1G07940	57.2362	126.07	270.164	530.852	535.708
AT1G07950	19.0062	88.777	96.8137	54.2588	33.9585
AT1G07960	23.8829	156.626	146.706	82.4483	55.8275
AT1G07970	3.93709	5.52059	9.27801	8.60047	7.68382
AT1G07980	30.6518	9.49134	13.5015	24.4925	26.4476
AT1G07985	3801.97	344.441	169.814	68.5095	31.2433
AT1G07990	8.6573	1.65671	3.63871	7.48004	12.4063
AT1G08000	2.67608	3.42444	6.48318	16.1558	11.5678
AT1G08005	0	0	0	0	0
AT1G08010	3.16298	3.62801	7.60341	20.1135	26.5816
AT1G08030	5.29385	10.4399	10.0369	10.0429	11.9085
AT1G08035	0.0754373	0.201891	0.234444	0.570189	0.671058
AT1G08040	11.1112	7.77016	10.5565	12.5605	18.9652
AT1G08050	8.74389	0.138968	0.329699	1.256	2.18877
AT1G08060	2.02674	0.27969	0.922251	1.49648	2.34404
AT1G08065	0	0	0	0	0
AT1G08070	0.930004	0.547868	1.01782	0.88097	0.631813
AT1G08080	0	0.0125064	0	0	0.0239795
AT1G08090	0	0.0056431	0	0.0302444	1.49892
AT1G08100	0.0066013	0	0	0.00784703	0.154439
AT1G08110	71.5494	131.722	118.489	103.545	102.972
AT1G08120	0.391339	0.23764	0	0	0.227823
AT1G08125	12.8849	16.8302	14.9368	21.493	17.6758
AT1G08130	2.64277	6.11436	8.76269	17.2661	14.6077
AT1G08135	0.0102861	0	0	0	0
AT1G08140	0.111333	0	0.00433973	0.00584617	0
AT1G08150	0.0411636	0	0	0	0.0071215
AT1G08160	0.0193657	0	1.75527	10.2339	5.29769
AT1G08165	0	0	0	0	0
AT1G08170	251.029	1.4224	2.73167	1.19088	0.802968
AT1G08180	14.5393	87.9725	60.6552	29.4324	25.6574
AT1G08190	6.25423	3.40433	7.9049	19.2314	46.0649
AT1G08200	20.8571	18.5385	65.9626	199.363	232.31
AT1G08210	14.6395	7.19758	12.6132	12.5555	9.4227
AT1G08220	3.0772	6.14784	9.94294	22.855	11.9987
AT1G08230	6.10903	1.00581	1.36724	4.64924	5.09767
AT1G08250	0.826372	0.255279	0.426831	2.61796	9.15538
AT1G08260	0.169642	0.425676	0.803804	2.27382	3.12737
AT1G08270	2.44147	2.00957	1.66971	3.05879	2.15158
AT1G08280	0.0440845	4.05131	4.55105	12.5772	11.4088
AT1G08290	0	0	0	0.00985483	0.195579
AT1G08300	1.10089	2.94209	1.5485	1.0631	1.14681
AT1G08310	0.504494	0.288252	0.212178	0.362888	1.64162
AT1G08315	3.09201	4.04781	5.25808	8.31013	11.8082
AT1G08320	3.62148	6.85752	12.7271	7.89933	8.56236
AT1G08340	1.48879	0.209501	0.572607	1.39123	13.3557
AT1G08350	0.346798	1.49909	3.6387	9.27734	11.2706
AT1G08360	71.0685	1170.31	1433.83	890.858	526.898
AT1G08370	14.9922	5.52593	11.6349	28.5281	32.1814
AT1G08380	3.17068	2.53716	12.0793	157.474	674.512
AT1G08390	4.55285	7.56762	9.94805	9.00462	7.5912
AT1G08400	0.818393	0.939416	1.02753	2.11646	2.30637
AT1G08410	18.9086	13.7279	14.2405	16.6021	11.4504
AT1G08420	7.69547	1.63092	3.49495	8.67336	15.113
AT1G08430	0	0.109842	0.0327088	0.207522	0.686551
AT1G08440	0	0	0	0	0.0196653
AT1G08450	4.64549	7.1039	11.0001	23.1767	33.2463
AT1G08460	20.605	8.50498	12.3307	11.3613	13.4416
AT1G08465	5.34147	11.2133	16.4764	8.98651	16.0456
AT1G08470	1.13242	3.74446	5.86931	13.9955	18.9615
AT1G08480	70.6497	146.914	185.304	234.739	229.018
AT1G08490	10.8374	5.17654	12.6383	24.5637	28.211
AT1G08500	0.907567	51.7927	147.236	82.7824	27.1081
AT1G08510	5.42555	3.33368	8.31641	31.4431	51.7398
AT1G08520	2.84908	6.88619	20.0566	37.0759	53.613
AT1G08530	3.72044	16.8796	17.9969	14.5976	17.8624
AT1G08540	1.017	3.65118	8.18597	26.084	44.2999
AT1G08550	10.3506	7.69766	9.26837	8.19264	14.1705
AT1G08560	0.360721	0.11612	0.604363	15.3427	70.6416
AT1G08570	463.922	16.8179	24.3558	9.499	12.3004
AT1G08580	47.2513	581.795	427.181	281.37	130.754
AT1G08590	0.489567	1.61047	4.75976	11.3147	13.8806
AT1G08600	2.71918	0.903846	2.14542	3.24702	5.53027
AT1G08610	2.38457	7.04641	6.66105	6.79392	4.70595
AT1G08620	1.67436	1.00673	2.88011	5.01629	7.17416
AT1G08630	2.7797	1.79204	1.98648	3.04658	2.70357
AT1G08640	17.1728	74.0406	76.5899	98.675	91.165
AT1G08645	17.7885	4.64738	15.2888	16.0202	12.9558
AT1G08650	22.1414	7.99954	24.0677	23.0583	15.5928
AT1G08660	2.69868	11.192	13.7888	23.5703	24.5549
AT1G08670	0	0.0584239	0.0816518	0.0427209	7.18234
AT1G08680	4.32072	4.24701	10.0458	14.3966	18.3248
AT1G08695	0	0	0	0	0
AT1G08700	8.99617	6.70278	11.1917	21.2439	20.0307
AT1G08710	8.79073	5.81245	5.40783	8.48088	7.782
AT1G08720	2.2723	1.3036	1.98239	2.48036	5.38229
AT1G08730	0.0275797	0.0795736	0.152696	0.261468	0.257988
AT1G08750	3.65166	16.6261	20.1373	12.4311	10.9047
AT1G08760	3.50653	1.77912	2.76998	6.30054	8.63268
AT1G08770	6.8341	12.4505	15.567	16.3579	20.8321
AT1G08780	37.6036	149.893	143.29	108.714	55.9682
AT1G08790	0	0	0	0	0.0654836
AT1G08800	0.747449	0.512262	1.0989	4.1162	11.1278
AT1G08810	0.0280863	0.0122151	0.114804	0.534756	5.10902
AT1G08820	6.96669	3.30287	8.68567	19.7015	29.2742
AT1G08830	74.2837	480.46	770.583	947.451	1107.67
AT1G08840	1.08526	0.727701	1.26988	1.51482	1.40647
AT1G08845	8.60087	22.4406	20.9489	18.1665	8.84955
AT1G08860	0.782259	0.164318	0.28656	0.351213	0.241777
AT1G08880	43.7231	105.215	102.826	184.403	139.429
AT1G08890	0.287437	7.40965	7.35991	5.9427	10.719
AT1G08900	0.021772	0.114294	0.257985	0.251926	0.936059
AT1G08910	8.06811	5.76984	12.9403	13.4235	7.56493
AT1G08920	0.694976	1.07797	6.34438	3.21163	18.2711
AT1G08930	0.461364	13.7096	17.9512	40.6467	42.1964
AT1G08940	0.294376	0.177899	0.521947	4.05048	10.2451
AT1G08960	0.0899226	0.515498	1.53382	6.14765	8.21452
AT1G08970	29.7279	49.4363	50.9925	45.2815	41.2316
AT1G08980	0.920664	9.4059	14.7001	13.5294	17.7629
AT1G08985	0	0	0	0	0
AT1G08990	0.0232706	0.00496027	0.0214156	0.404931	5.12575
AT1G09000	0.245201	0.163916	0.418139	1.20812	2.50332
AT1G09010	8.28495	4.37825	10.2579	12.0529	17.1238
AT1G09020	3.28242	6.79648	11.1442	21.5509	28.9719
AT1G09030	0	0	0	0	0
AT1G09040	0.155208	0.290954	0.546417	0.98317	1.34802
AT1G09050	0.0383372	0.204025	0.515183	0.952005	1.36026
AT1G09060	2.88744	2.11331	3.55543	5.54994	8.59265
AT1G09070	121.768	11.7941	17.8229	49.1987	69.6324
AT1G09080	0.00494467	0.0197586	0.00611457	0.00829283	0.0975993
AT1G09090	0.0149818	0.0755682	0.226626	0.151178	2.14333
AT1G09100	24.584	21.1154	26.4104	30.3196	26.833
AT1G09130	31.8794	24.0463	41.9453	77.5703	99.525
AT1G09140	61.2744	31.135	29.6951	56.6235	60.3631
AT1G09150	15.765	49.6681	67.3132	83.6162	59.0197
AT1G09155	1.06913	0.021067	0	0.0591812	2.0739
AT1G09157	0	0.0139781	0	0.0150688	0.276566
AT1G09160	0.688232	5.78137	9.06708	19.9747	21.977
AT1G09170	0.00458983	0.0195024	0.0147348	0.353797	3.01297
AT1G09176	0	0	0	0.051971	1.13873
AT1G09180	0.094452	2.12756	3.18241	3.42247	0.883763
AT1G09190	0.787523	3.85459	3.71414	4.46525	2.86862
AT1G09195	0.948532	0.668509	0.824806	1.567	2.3505
AT1G09200	6.30837	62.3738	247.26	643.127	386.806
AT1G09210	1.85122	20.5028	79.6047	257.914	244.912
AT1G09220	0.504582	3.52381	2.51302	2.08449	1.47244
AT1G09230	4.41647	3.16044	5.17013	9.4097	9.37555
AT1G09240	0.0840613	0.230304	1.78696	6.72651	10.2705
AT1G09245	0	0	0	0	0
AT1G09250	16.1144	5.4482	6.12056	24.9238	23.1134
AT1G09260	0.0829703	0.138613	0.0449503	0.034788	0
AT1G09270	16.2225	6.35894	10.3873	28.7937	40.1366
AT1G09280	10.8394	15.263	19.8957	13.9315	10.6375
AT1G09290	30.4093	35.2099	27.4266	24.4287	16.6504
AT1G09300	6.04204	4.69987	7.89236	12.0006	8.05997
AT1G09310	7.98859	18.8432	66.3567	541.626	2354.27
AT1G09320	4.41811	2.37492	2.77653	4.07336	3.9783
AT1G09330	16.0769	76.6273	86.1056	99.4556	76.8383
AT1G09340	1.4918	12.9253	16.4757	47.3756	151.148
AT1G09350	0.0167535	0.0082948	0	0	2.08772
AT1G09360	0	0	0	0	0
AT1G09370	0	0	0	0.0228428	0.0513318
AT1G09380	0.569816	1.551	8.63608	20.6933	1.67675
AT1G09390	0.208457	12.5352	41.2704	20.7438	19.2822
AT1G09400	0.0712677	0.249994	0.239533	0.336742	0.593286
AT1G09410	0.0974986	0.54299	0.665232	0.769999	0.725154
AT1G09415	2.89163	6.71596	13.556	16.5273	14.46
AT1G09420	5.28968	9.00193	10.7401	13.0241	10.8791
AT1G09430	38.259	5.75079	14.0487	27.3823	51.2345
AT1G09440	0.0431094	0.0111241	0.211123	1.35725	3.20249
AT1G09450	0.0753786	0.217144	0.483865	2.3106	2.91429
AT1G09460	0.0922755	2.25702	5.82751	11.0803	6.18277
AT1G09470	0.140203	2.75163	3.20752	5.0271	8.77568
AT1G09480	0.328684	1.22016	1.66923	1.63943	1.22862
AT1G09483	0	0	0	0.0674903	0
AT1G09490	5.41279	23.6407	22.3058	20.5205	20.4743
AT1G09500	31.5058	4.78815	5.43356	4.51328	2.93214
AT1G09510	0.103957	0.0387908	0.0814937	0	0.0417212
AT1G09520	20.1821	44.4576	38.2188	32.8781	22.0284
AT1G09530	2.49793	11.6227	13.3297	26.1823	27.6714
AT1G09540	0.0149704	0	0.0123986	0.395367	3.9322
AT1G09550	0	0	0	0.0078345	0.0233726
AT1G09560	15.8115	3.12379	6.38153	88.9826	128.66
AT1G09570	15.8334	15.5218	33.5083	54.1766	102.095
AT1G09575	0.135959	0.951058	1.63235	3.27201	6.07829
AT1G09580	1.27395	12.9988	23.2124	49.3181	36.4573
AT1G09590	51.2411	1014.81	1421.2	1509	738.36
AT1G09600	0.0226086	0.0504473	0.0595576	0.709348	1.69385
AT1G09610	0.3264	0.054421	0.0172055	0.205069	0.582076
AT1G09620	11.3098	7.39939	19.1877	29.5789	37.8781
AT1G09625	0	0	0	0.441373	0
AT1G09630	1.08822	21.6426	54.6074	85.5773	65.372
AT1G09640	39.083	89.1731	143.621	256.37	208.131
AT1G09645	54.2651	146.446	101.252	63.0325	41.8568
AT1G09650	0.450001	0.61691	0.637703	0.916064	0.730352
AT1G09660	1.53289	9.97627	19.3961	43.3516	35.3069
AT1G09665	2.06699	0.0263094	0.0748063	0	0.0283434
AT1G09680	1.37681	1.78107	1.70347	1.21616	1.08596
AT1G09690	127.395	2659.38	2578.4	2223.1	1352.46
AT1G09700	1.90247	17.3477	17.0598	17.2756	13.6303
AT1G09710	1.88269	0.972376	1.41283	2.61391	2.58675
AT1G09720	0.0204946	0	0.00378637	0	0.00291405
AT1G09730	4.57613	2.22526	3.57991	5.44326	7.98342
AT1G09740	15.5876	3.90361	3.3014	11.8383	78.8388
AT1G09750	0.27235	1.74501	10.0127	23.5342	32.2097
AT1G09760	29.5282	113.222	137.543	87.3005	56.2916
AT1G09770	19.1235	6.25804	14.7436	24.9028	34.7791
AT1G09780	0.871887	3.16774	15.5211	141.878	243.75
AT1G09790	0	0	0	0.0065041	0
AT1G09794	26.7231	28.6358	24.0883	10.738	17.3288
AT1G09795	28.6269	17.4704	20.6492	34.9753	42.36
AT1G09800	2.30082	3.86576	5.78991	8.81945	5.5314
AT1G09810	9.15282	18.3391	15.8167	10.7078	7.1649
AT1G09812	0.0481053	1.38299	1.1819	0.904436	1.1878
AT1G09815	46.2834	100.119	81.4368	86.129	51.7961
AT1G09820	0.483876	0.726168	1.15394	2.75415	2.8646
AT1G09830	2.35598	14.8509	12.7057	31.8123	28.9991
AT1G09840	3.20635	5.68213	7.14202	15.0954	25.33
AT1G09850	0.126375	0.12614	0.880021	14.1393	40.3175
AT1G09860	0	0	0	0.0168556	0.173329
AT1G09870	7.1756	10.7528	13.2088	22.2872	23.7795
AT1G09880	0.0110734	0.0144158	0.00505893	0.536575	0.261428
AT1G09890	0	0.00443183	0.0110413	0.116614	0.992233
AT1G09900	2.26206	17.2975	16.6519	13.581	11.4027
AT1G09910	8.65232	1.70691	3.13751	2.69106	3.98144
AT1G09920	38.3848	38.2109	42.8289	37.8486	48.734
AT1G09930	0	0.0066656	0	0.00378057	0.0696323
AT1G09932	0.0674865	0.0376754	0.109819	2.12944	11.7458
AT1G09935	0	0	0	0.0161603	0
AT1G09940	10.8892	3.27279	5.9049	8.32978	13.1109
AT1G09950	1.86488	3.07846	1.50024	1.18927	1.31669
AT1G09960	1.18854	6.63329	11.9736	11.7403	11.5929
AT1G09970	41.0881	7.56069	5.93647	16.9958	42.4898
AT1G09980	2.14848	1.86261	4.08697	9.77521	14.0293
AT1G09995	0.817845	24.7014	21.8644	22.6989	13.6675
AT1G10000	0.631203	2.91436	5.58504	7.89289	1.80556
AT1G10010	0	0	0.00907757	0.0237532	0.00695413
AT1G10020	0.0967772	1.71917	2.09914	7.12539	9.49356
AT1G10030	6.79455	65.1263	97.0355	88.4803	69.9779
AT1G10040	0.932694	6.74335	3.81216	5.82559	4.37094
AT1G10050	0.204486	0.165047	0.382568	1.82693	4.25899
AT1G10060	0.0580137	0.0523915	1.02093	1.67886	2.31709
AT1G10070	13.6684	0.860756	0.422269	0.142929	0.482532
AT1G10090	1.45448	2.28619	3.58924	3.25651	8.71376
AT1G10095	2.91045	1.40141	2.01092	2.12119	1.94003
AT1G10100	0.046563	0	0.072354	0	0
AT1G10110	0.249128	0.200532	0.132596	0.423839	0.279271
AT1G10120	1.65579	6.46507	9.7625	35.2701	30.2972
AT1G10130	0.807512	2.17328	5.06894	13.1427	16.316
AT1G10140	4.69616	8.80145	8.90866	7.75354	11.9739
AT1G10150	0.751555	4.00588	8.70414	4.7084	5.58992
AT1G10155	0.0379307	0	0.0314145	0.139327	0.0693162
AT1G10170	14.842	1.48914	3.9495	6.48177	10.4779
AT1G10180	1.70511	5.28549	7.46074	12.1007	12.3389
AT1G10190	0	0	0	0	0
AT1G10200	0.970331	14.9965	55.6381	83.0149	162.726
AT1G10210	1.10635	1.03003	1.33951	1.51232	2.42969
AT1G10220	0.0270861	0.0317732	0.0641867	0.0165585	0.479215
AT1G10225	0	1.74998	0.732257	6.88883	6.58212
AT1G10230	6.17153	58.9293	48.6284	84.368	44.9333
AT1G10240	1.39881	2.82927	3.3916	5.21426	4.80338
AT1G10250	0.15129	0	0.157882	0	0
AT1G10270	2.09251	2.09276	3.87583	5.90845	5.97431
AT1G10280	0.545251	0.441349	1.34596	4.10967	5.11315
AT1G10290	2.51723	1.73135	6.40697	25.8972	37.6074
AT1G10300	0.209238	0.402799	0.455921	0.604989	0.424188
AT1G10310	50.5699	22.3112	27.688	43.0831	25.3562
AT1G10320	1.52078	1.43793	1.47183	1.76487	3.01028
AT1G10330	0.0870189	0.704268	1.23944	2.27435	1.10174
AT1G10340	0	0.00919113	0.014543	0.0150841	0.0798607
AT1G10350	0.703696	2.41493	3.11474	6.34589	14.204
AT1G10360	0.269878	0.137674	0.489983	3.3132	8.43278
AT1G10370	3.98283	0.894078	3.87793	123.169	124.541
AT1G10380	0.0360344	0	0.0447375	2.86928	7.0415
AT1G10385	0.0147594	0	0	0.0761809	0.715829
AT1G10390	7.90105	3.6539	6.64188	11.3732	17.5988
AT1G10395	4.575	1.05762	1.30259	2.65949	6.72276
AT1G10400	0	0.0424122	0.181934	5.23538	2.61692
AT1G10410	4.8525	6.64872	6.20016	12.6581	31.873
AT1G10417	0.16	0.537644	0.614399	0.61305	0.699506
AT1G10430	7.18466	20.286	29.5645	26.58	27.2863
AT1G10450	2.05359	1.61065	2.05278	3.13747	5.13772
AT1G10455	0	0.0257139	0	0	0.058012
AT1G10460	0	0.246097	0.537068	1.93414	5.73862
AT1G10470	0.613164	5.20176	5.60403	28.1294	81.8692
AT1G10480	0	0	0	0.0302073	0.881373
AT1G10490	3.08678	10.74	12.4055	13.5935	7.64623
AT1G10500	103.586	140.414	146.339	86.0748	71.1937
AT1G10510	5.4305	16.0011	19.5529	28.2343	26.4463
AT1G10520	1.70609	1.94821	1.72975	2.3103	1.44012
AT1G10522	7.77028	53.7847	106.119	183.28	81.9943
AT1G10530	0.772939	0.568529	1.74287	3.95897	4.69543
AT1G10540	0.0174601	0.0254317	0.561036	1.6896	0.417035
AT1G10550	0.0720918	2.04031	2.4053	7.45759	9.5948
AT1G10560	0	0	0.0059016	0.508711	0.891343
AT1G10570	2.59081	4.05439	4.16334	5.20074	7.74827
AT1G10580	12.3544	3.61383	5.37958	14.1615	21.1185
AT1G10585	0	0	0	0	0.0987607
AT1G10586	0	0	0	0	0
AT1G10588	0	0	0	0	0
AT1G10590	116.81	181.598	179.871	244.339	197.058
AT1G10600	15.857	6.75392	9.14329	11.6117	9.8681
AT1G10610	4.06308	3.59076	4.40861	3.22904	1.86355
AT1G10620	0.00633577	0	0	0	0
AT1G10630	2.22414	11.3236	43.0281	205.911	184.826
AT1G10640	0.00645983	0.183817	0.322163	0.934797	1.33333
AT1G10650	2.37475	6.96737	9.80705	15.1304	28.8276
AT1G10657	0	0	0.350559	0.755651	7.56185
AT1G10660	21.333	17.7829	22.4727	21.2581	26.1679
AT1G10670	2.03143	13.6028	31.729	142.36	205.046
AT1G10680	0	0.00225725	0	0.0104537	0.0363371
AT1G10690	2.85233	0.53367	0.908527	3.24956	2.38986
AT1G10700	2.19464	4.2728	9.18189	16.3444	24.3863
AT1G10710	0	0.0424658	0.0868787	0.476627	0.186448
AT1G10715	0	0	0	0	0
AT1G10717	0	0	0	0	0
AT1G10720	1.23955	1.75381	3.54593	10.5092	16.3145
AT1G10730	2.09459	2.53917	2.86252	3.22528	5.64948
AT1G10740	0.73688	7.64251	24.4861	37.4483	28.7037
AT1G10745	0	0.147791	0	0	0.159216
AT1G10747	0	0	0	0	0
AT1G10750	0.031796	3.42645	4.26338	2.41822	1.93681
AT1G10760	0.457223	5.55547	16.8406	20.4324	38.6543
AT1G10770	15.6703	1.16977	2.1385	1.15217	1.37666
AT1G10780	0.209556	3.02791	5.20877	8.59458	11.6417
AT1G10790	0.0152776	0.0082335	0	0.0285705	0.485443
AT1G10800	0	0	0	0.362808	1.12873
AT1G10810	0.302472	0.383939	0.403474	1.30106	1.67215
AT1G10820	1.5451	7.16624	10.1278	9.48339	9.65137
AT1G10830	10.0047	8.09764	10.8514	18.2271	33.0335
AT1G10840	56.725	124.747	206.578	153.319	109.42
AT1G10850	0.386128	1.13514	3.56754	14.6997	23.5173
AT1G10865	101.16	107.975	102.471	71.0145	76.1415
AT1G10870	4.4039	4.40788	6.41913	10.2088	14.0873
AT1G10875	0.0190187	0	0	0	0
AT1G10880	0.0410985	0.0290263	0.0116253	0.0157667	0
AT1G10890	9.75532	9.29659	8.1894	15.8359	19.896
AT1G10900	2.71892	4.66072	7.34524	12.8023	16.7534
AT1G10910	5.4355	9.18604	10.5199	12.477	14.336
AT1G10920	0.0233048	0.0836978	0.0837677	0.220345	0.301811
AT1G10930	0.764212	1.42918	3.17273	7.9686	8.29769
AT1G10940	14.2443	19.998	15.9382	23.3931	40.1982
AT1G10950	7.59237	19.0837	43.7275	71.0493	84.3061
AT1G10960	8.49917	64.1526	280.574	1396.25	1121.06
AT1G10970	3.91883	8.71793	6.71349	31.8182	17.8402
AT1G10980	0	0	0.0072479	0.0059406	0.029408
AT1G10990	0.0681809	0.255414	0.627976	10.5649	4.05928
AT1G11000	0.642638	3.03526	3.93317	6.03009	6.89872
AT1G11020	24.9856	17.9775	15.9053	11.6146	13.9551
AT1G11040	0	0	0	0	0.335414
AT1G11050	2.54196	0.614799	0.729309	1.61748	2.56613
AT1G11060	2.87348	2.61386	3.65571	3.8059	5.0778
AT1G11070	0.0949794	0.010775	0.0102756	0.0141117	0.164167
AT1G11080	0.00701613	0	0	0	0.0589516
AT1G11090	0.668467	2.8273	3.83384	6.90671	9.12992
AT1G11100	0.55283	0.113326	0.15873	0.300571	0.783177
AT1G11110	0	0	0.067636	0.0118868	0.0132832
AT1G11112	0	2.50254	9.31055	7.42654	2.29402
AT1G11120	0.0339873	1.99421	5.53305	6.57737	4.48179
AT1G11125	0.139359	4.7665	6.72019	9.22678	1.97961
AT1G11130	0.0411947	0.939694	3.0653	4.58927	5.18542
AT1G11145	0	0	0	0.144885	0
AT1G11160	0	0.0272751	0.115406	0.427455	1.92469
AT1G11170	9.23415	5.76649	3.35034	2.11168	3.02459
AT1G11180	10.8871	4.08046	9.31969	15.632	11.532
AT1G11190	0.586406	0.0721438	0.0311086	0.0617963	2.65035
AT1G11200	3.17201	13.5957	19.8173	19.6079	18.8012
AT1G11210	0.49086	0.346412	0.406773	0.277842	2.44197
AT1G11220	0.0346683	0.0196622	0.164659	2.65128	7.13981
AT1G11230	0	0	0	0	0
AT1G11240	55.2168	46.6091	48.8324	76.2671	53.6547
AT1G11250	0.169571	0	0	0.0717025	0.116332
AT1G11260	12.1084	5.76342	14.8413	12.9515	19.6409
AT1G11270	1.46614	1.45242	3.05494	3.14957	2.59977
AT1G11280	0.954345	8.03234	7.24405	10.6981	12.3268
AT1G11290	0.37863	1.08401	1.78358	1.84991	2.3337
AT1G11300	2.47394	3.49176	3.29061	4.51155	2.57449
AT1G11303	0.086935	0.0367954	0.0429104	0.053538	0.73144
AT1G11310	4.09855	15.1593	26.5243	36.4065	39.3455
AT1G11320	1.73232	3.39941	3.23157	5.00948	3.64039
AT1G11330	0.316048	0.392462	0.935624	5.36471	10.686
AT1G11340	0.282022	0.00658643	0.0551471	0.148057	0.257246
AT1G11350	1.22034	0.488534	0.787483	1.00195	1.8029
AT1G11360	28.678	12.8453	11.8734	18.5169	25.8156
AT1G11362	0	0.0627837	0	0	0.0238052
AT1G11370	1.64852	0.634059	0.389235	0.171881	0.0256512
AT1G11380	2.40323	4.12762	5.20699	6.79672	8.6281
AT1G11390	2.47284	2.18376	4.48077	12.1593	14.3411
AT1G11400	57.3367	67.0722	69.1656	54.3659	37.6054
AT1G11410	0.621724	0.837565	1.52084	1.97714	2.73992
AT1G11420	0.189828	3.20918	2.74538	2.43431	1.78822
AT1G11430	39.1705	165.379	299.748	308.671	233.51
AT1G11440	1.19939	0.834124	1.46268	3.30983	5.18342
AT1G11450	0.0422545	0.298378	0.337054	0.249709	7.15272
AT1G11460	0.788394	0.0644061	0.0935497	0.0643721	0.156212
AT1G11470	0	0	0	0	0
AT1G11475	373.016	1787.43	1093.86	358.444	128.326
AT1G11480	23.6074	5.63224	14.9977	26.1393	34.0898
AT1G11490	0.0137991	0	0	0.849131	0.386038
AT1G11500	0	0	0	1.19553	0.112199
AT1G11510	0.0157015	0.0352153	0.0243985	0	0
AT1G11520	0	0.0170551	0	0.054164	0
AT1G11530	179.705	20.8483	22.7411	12.9118	16.2359
AT1G11540	0.0234026	0.0122495	0.0628677	3.70458	2.2833
AT1G11545	0.387295	5.44914	14.175	60.2072	49.7206
AT1G11560	0	0	0.051803	0.0726583	0.019233
AT1G11570	0.034387	0.252304	1.21027	3.70912	0.76902
AT1G11572	0	0.103818	0.893693	1.04809	0
AT1G11580	1.32032	10.9579	93.7481	247.71	178.298
AT1G11590	0.0344323	0.00649387	0.0313603	0.0142453	0.0061589
AT1G11591	2.80945	6.50738	5.837	7.84229	6.47748
AT1G11593	0	0.0994693	0.0565571	0	0
AT1G11600	0.146992	0.122709	0.71114	19.8608	74.5578
AT1G11608	0	0	0	0.226684	0.129506
AT1G11610	0.0313927	0	0.106869	0.0747826	0
AT1G11620	0.0138919	0.00880907	0	0	0.0084452
AT1G11630	1.41216	11.844	9.14824	7.8141	6.89242
AT1G11650	73.1883	57.0959	88.9908	178.314	196.936
AT1G11655	0	0	0.809096	1.04759	19.5086
AT1G11660	1.33672	1.80319	4.96048	14.7152	26.376
AT1G11670	0.434391	5.72027	9.85473	26.5762	50.6167
AT1G11680	3.84171	12.1454	38.8568	103.768	100.289
AT1G11684	0	0	0	0	0
AT1G11690	0	0	0	0.0528736	0.145737
AT1G11700	4.56681	1.09542	0.99557	4.1648	22.9411
AT1G11710	0.859688	1.7813	1.20309	1.29343	1.3234
AT1G11720	2.62765	4.71107	6.825	7.79036	10.8652
AT1G11730	0	0.0164571	0.139044	0.310052	0.836528
AT1G11740	0.0369948	0.797812	1.13837	1.65169	0.687562
AT1G11750	34.4827	85.9395	112.92	131.229	134.928
AT1G11755	4.37549	8.18537	8.06094	9.21549	9.50562
AT1G11760	8.12714	7.44582	7.22202	9.07708	7.33765
AT1G11765	9.91299	0.071241	0	0	0.0398487
AT1G11770	0.225943	0.0111424	0.0464015	0	0.0120695
AT1G11780	5.14854	16.7825	23.8347	19.0203	13.2139
AT1G11785	0	0	0	0	0
AT1G11790	0.512293	2.62606	6.02029	15.7289	24.5427
AT1G11800	3.55017	7.33225	4.79479	5.52783	5.59535
AT1G11810	0	0	0	0	0.0091631
AT1G11820	2.8953	10.8086	17.9706	33.2838	30.5254
AT1G11840	181.491	121.213	116.418	179.569	610.859
AT1G11850	0.105493	0.058205	0.240481	1.31471	6.8472
AT1G11860	46.3539	23.3269	48.8629	201.948	437.073
AT1G11870	2.36129	2.75147	8.77835	22.2531	19.9534
AT1G11880	0.293657	2.36125	4.18995	3.00682	3.15325
AT1G11890	5.7897	12.1915	21.7013	56.6274	50.1055
AT1G11900	1.40542	4.47118	3.96869	2.80463	2.7275
AT1G11905	2.16895	12.97	16.649	17.0412	14.6092
AT1G11910	314.574	46.3554	78.6925	129.066	242.49
AT1G11915	0	0.201586	1.24487	0.261253	0.321741
AT1G11920	0.0141248	0	0.0890349	0.219511	6.93663
AT1G11925	0.120565	0	0	0	0
AT1G11930	46.0781	9.38128	14.7489	27.9683	47.026
AT1G11940	0.650945	1.8018	3.83074	4.69885	5.55624
AT1G11950	3.44384	1.97617	1.95081	2.68608	3.17665
AT1G11960	0.857444	0.322455	1.03476	2.38955	3.59226
AT1G11970	0	0	0	0.130642	0
AT1G11980	0.281133	0	0	0	0
AT1G11990	0.0261576	0	0	0.00489737	0.00516747
AT1G12000	0.966877	5.59277	16.9734	74.6881	105.395
AT1G12010	0.458931	0.0102965	0	0.0959007	1.33481
AT1G12020	7.58053	49.9378	35.999	21.771	14.4731
AT1G12030	0.602279	0.2498	0.675438	0.11267	0.152447
AT1G12040	0.15003	0.104888	0.448634	2.36195	73.5193
AT1G12050	4.56057	8.3535	13.0147	15.8827	29.7871
AT1G12060	21.5046	4.35107	4.69121	5.98376	12.1926
AT1G12064	105.574	227.387	187.766	166.689	118.281
AT1G12070	0.300487	12.5787	16.7654	8.07307	5.40014
AT1G12080	0.584425	0.396389	0.724149	60.2616	101.78
AT1G12090	8.41276	64.688	216.589	1491.73	1599.12
AT1G12100	0	0.147264	1.67213	4.67285	2.72645
AT1G12110	1.50319	18.6487	19.1247	21.3868	122.34
AT1G12120	3.14721	17.5961	24.5752	24.6222	30.2573
AT1G12130	26.9455	4.33456	4.20762	6.57278	3.42967
AT1G12140	4.62197	2.82021	2.57551	7.23732	24.7791
AT1G12150	0.0895499	0.0409681	0.0790845	0.421942	4.92602
AT1G12160	0.65129	0.863769	3.35607	3.54419	3.97253
AT1G12170	0	0	0	0	0
AT1G12180	0	0.0462753	0	0.0819913	0
AT1G12190	0.00973497	0.0084677	0.0120383	0.0086455	0
AT1G12200	0.220061	1.10305	2.02034	3.87721	10.4348
AT1G12210	0.832033	0.441987	0.760599	0.757296	0.881099
AT1G12211	0	0	0	0	0
AT1G12220	0.267131	0.676264	0.741931	0.670274	0.821909
AT1G12230	1.53119	5.46197	14.0568	19.943	31.2631
AT1G12240	0.679746	0.198709	2.7856	65.9352	69.7111
AT1G12244	2.1076	25.8849	24.9895	14.1025	12.1127
AT1G12250	2.49566	7.55239	16.0793	10.3057	14.6792
AT1G12260	0.0136535	0.0377344	0.152312	0.697796	1.73333
AT1G12270	5.88359	7.0454	14.4304	38.3766	37.8011
AT1G12280	0.507521	0.275317	0.404102	0.498805	1.41053
AT1G12290	0.194687	0.150516	0.1695	0.260113	0.553069
AT1G12300	0.11738	0.227866	0.56104	0.837227	0.967531
AT1G12310	30.4306	112.191	211.535	259.988	239.341
AT1G12320	18.5231	5.77887	4.14745	2.17628	3.74637
AT1G12330	25.7862	7.56016	8.59657	12.7665	15.8142
AT1G12340	0	0.669408	0.573129	1.38098	0.46324
AT1G12350	18.0489	18.9265	19.8672	11.7552	12.4306
AT1G12360	8.28716	2.49683	5.58062	13.3432	24.6381
AT1G12370	1.21077	0.925603	2.71376	10.6944	9.28501
AT1G12380	0.0118684	0.00953807	0.09018	0.494133	2.10342
AT1G12390	15.5326	80.0329	85.3497	46.0839	36.6651
AT1G12400	7.88585	71.9895	58.5054	45.7114	37.4547
AT1G12410	100.518	64.3711	96.0026	163.245	164.615
AT1G12411	0	0	0	0	0
AT1G12420	0.761414	0.49495	0.956722	3.36589	4.84693
AT1G12430	0.626027	1.22565	1.8936	3.21972	6.7694
AT1G12440	265.105	148.656	184.075	145.938	95.7906
AT1G12450	0.691448	2.57855	5.59793	3.81682	6.88032
AT1G12460	0.0391077	0.677071	1.54178	3.18844	7.61253
AT1G12470	3.76485	2.78008	4.279	7.42425	12.9566
AT1G12480	0.281994	0.0867578	0.0285091	0.103641	0.411258
AT1G12490	0.024941	0.0259896	0.048797	0.0246887	0.00876927
AT1G12500	0.172845	0.825784	3.98108	19.4309	25.7205
AT1G12520	32.5377	17.8505	45.2122	77.128	64.1084
AT1G12530	6.03931	23.3907	20.1949	19.6147	23.9409
AT1G12540	0	0	0	0.0139681	0
AT1G12550	0.599751	1.35924	1.3448	1.90714	6.22507
AT1G12560	0.139509	0.195677	0.949129	11.3866	126.475
AT1G12570	0.0548739	0.302986	0.526258	0.665251	0.167863
AT1G12580	3.97978	4.05883	5.15163	10.891	19.8101
AT1G12600	0.0900451	0.265506	0.848313	1.00382	0.706651
AT1G12610	0.109879	0	0.10012	0	0.0198782
AT1G12615	0	0	0	0	0
AT1G12620	0.128417	1.01737	1.1908	2.76903	2.52623
AT1G12630	0	0	0	0.0199574	0.0198462
AT1G12640	5.57472	3.69293	8.08728	13.6464	24.0548
AT1G12650	25.0565	47.8276	43.1341	49.7211	34.0013
AT1G12660	0	0	0	0	0
AT1G12663	0	0	0.0750573	0	0.056877
AT1G12665	0	0.202779	0.136548	0	0.565746
AT1G12672	0	0.768839	0	0.777596	1.1896
AT1G12680	7.54293	3.61066	4.36083	5.931	9.01748
AT1G12700	0.0408379	0.369233	0.423712	0.802516	1.06341
AT1G12710	20.6562	9.93226	13.8803	4.4289	6.15059
AT1G12730	0.873986	3.30284	4.91886	2.81997	2.53596
AT1G12740	0.0956613	0.243697	0.80492	6.95949	28.0312
AT1G12750	3.63533	2.95556	3.18164	3.43648	8.08071
AT1G12760	22.2338	11.9433	11.5834	19.5058	31.8534
AT1G12770	9.65456	7.81941	15.99	30.0299	39.7109
AT1G12775	0.724032	1.57655	1.62972	1.73707	1.78985
AT1G12780	41.2535	247.022	318.105	161.424	62.808
AT1G12790	2.90036	5.99563	14.0491	9.76929	3.76524
AT1G12800	1.56249	17.3569	38.4323	59.4293	82.4632
AT1G12805	8.67616	1239.9	3019.68	728.941	74.8871
AT1G12810	38.3042	24.7104	58.0164	37.298	42.1012
AT1G12820	2.63957	4.45744	6.91375	15.5691	20.3027
AT1G12830	23.0556	73.5216	43.2621	39.7671	27.9501
AT1G12840	33.3384	49.9114	77.4156	148.142	228.366
AT1G12845	0.461892	14.9243	22.1936	25.9589	21.2023
AT1G12850	2.89962	4.74488	11.8813	33.9904	45.2146
AT1G12855	0	0.011879	0.0797616	0.0349318	0.0484388
AT1G12860	2.68102	13.7088	18.6414	17.7677	19.5232
AT1G12870	0	0	0	0	0
AT1G12880	0.0301405	3.58747	15.1679	7.22084	4.32563
AT1G12890	0.122346	6.84186	13.893	2.59648	1.38832
AT1G12900	1.92312	5.47482	31.843	89.6333	239.901
AT1G12910	11.9607	19.8125	34.663	28.116	21.2797
AT1G12920	28.66	120.133	128.295	110.561	81.777
AT1G12930	1.48872	1.88416	3.58	4.61126	6.5427
AT1G12940	3.51633	0.0392788	0.0170741	0.0162079	0.0295677
AT1G12950	0.0773894	0.0868556	0.28991	5.34582	31.9468
AT1G12960	0.194359	0.253887	0	0.134608	0.203072
AT1G12970	14.2341	4.34756	8.26811	6.7226	7.47956
AT1G12980	0.0157429	0.0288924	0.448016	0.360264	0.202539
AT1G12990	0.43597	0.753372	1.79367	5.27059	8.19708
AT1G13000	1.37316	3.28653	4.55637	10.2972	13.0516
AT1G13020	2.62044	4.42329	7.1072	15.6398	28.4797
AT1G13030	1.32662	3.01007	4.04106	8.05955	5.83281
AT1G13040	0.647361	0.541629	1.13093	1.49899	1.47727
AT1G13050	1.20666	1.09507	3.22971	4.01338	3.04817
AT1G13060	58.6907	98.2623	139.19	152.5	136.379
AT1G13080	0.579152	18.5492	39.6258	86.8179	31.0882
AT1G13090	31.857	8.40155	7.536	8.17675	9.89191
AT1G13100	0	0	0.0329399	0.587232	2.92355
AT1G13110	0.0737565	0.0296287	0.236395	7.97197	22.8428
AT1G13120	4.24221	5.89243	6.22295	10.1073	10.7371
AT1G13130	0.00619437	0	0.029556	0	1.28271
AT1G13140	0.191752	0.343342	0.290238	0.466031	0.437645
AT1G13143	0.0869333	0.0756167	1.11408	0.0772047	0.153956
AT1G13150	0.0380412	0.223061	0.237578	0.239259	0.247495
AT1G13160	3.83187	7.59901	10.0951	19.644	16.8812
AT1G13170	0.0706363	0.95157	3.87937	13.2679	20.583
AT1G13180	1.60915	5.62085	10.4038	11.2244	12.1299
AT1G13190	14.7628	6.42496	7.85413	8.21361	16.702
AT1G13195	15.2313	9.24178	7.06549	6.01954	8.29717
AT1G13200	0	0	0	0.00724227	0.655365
AT1G13210	0.0997968	0.407497	1.536	5.26835	8.83514
AT1G13220	1.12055	1.55875	1.90647	2.60228	4.69904
AT1G13230	0.0345877	1.58889	2.06827	1.39488	0.71769
AT1G13245	0	0	0	0	0
AT1G13250	0.0846281	0.0884652	0.559865	6.24941	25.7935
AT1G13260	0.0256569	0.0348136	0.191671	4.50147	20.9212
AT1G13270	2.59294	22.6491	50.4881	84.7585	89.8186
AT1G13280	2.94152	23.438	59.2323	60.162	113.041
AT1G13290	0	0	0	0	0
AT1G13300	0	0.0089119	0	0.0248617	2.8447
AT1G13310	0.23624	0.0415769	0.0226595	0.0255369	0.0265483
AT1G13320	7.98217	15.4577	22.9495	32.6511	40.1301
AT1G13330	1.01522	9.27537	8.27338	7.12948	5.75448
AT1G13340	42.0538	3.81585	1.76971	1.18119	0.84225
AT1G13350	3.16953	2.94615	3.20083	3.15539	4.90912
AT1G13360	208.105	62.0644	43.3788	28.5579	40.5082
AT1G13370	0.0636947	0.226321	0.19795	1.20466	1.18463
AT1G13380	1.53847	33.6202	37.9742	45.0335	41.8167
AT1G13390	38.5804	17.9261	13.835	17.2419	20.4878
AT1G13400	0	0.0314617	0.0461137	0.0902751	0.389141
AT1G13410	1.65205	9.13065	7.26617	3.33653	2.07922
AT1G13420	0.150042	0.0457805	0.484805	0.915877	97.7787
AT1G13430	0.0289508	0.0247815	0.37718	1.28733	26.2661
AT1G13440	111.447	243.133	409.97	927.468	1684.36
AT1G13450	37.3955	6.11186	8.94007	9.08483	11.0705
AT1G13460	14.7499	11.9914	9.91461	11.7952	15.759
AT1G13470	0.0263665	0	0	0	0.00910467
AT1G13480	0.0139931	0.0207843	0.0231784	0.476443	0.424107
AT1G13485	0	0	0	0	0
AT1G13490	0	0	0	0.00862173	0.0179197
AT1G13500	0	0	0	0.0903284	0.643601
AT1G13510	0.0131413	0	0.0694056	1.58671	2.76849
AT1G13520	0.266455	0.022008	0.0115892	0.963837	0.884969
AT1G13530	0.167008	0.197868	0.208373	1.05842	2.4999
AT1G13540	0.00954993	0.188293	0.637217	0.561842	0.558383
AT1G13550	0.0186855	0	0.0231065	0.369123	0.150355
AT1G13560	14.3342	37.2199	41.604	53.2801	48.0377
AT1G13570	3.95667	3.90047	10.2845	9.10142	7.92839
AT1G13580	0.652185	8.03293	9.90768	14.0443	13.819
AT1G13590	77.4932	294.421	179.814	109.835	45.9049
AT1G13600	0.0316465	0.168386	0.192138	0.911925	1.87832
AT1G13605	0	0	0	0	0
AT1G13607	0	0	0	0	0
AT1G13608	0.281133	0	0	0.299154	0
AT1G13609	0.306013	0.667461	0.982399	2.41626	0.512723
AT1G13610	0.0153796	0	0.049148	0.301902	2.86042
AT1G13620	0.0946973	2.51454	10.2971	7.01103	5.61691
AT1G13630	0.292575	0.385763	0.558648	0.816685	0.877925
AT1G13635	0	0.0106737	0	0.0608948	1.20223
AT1G13640	52.2673	16.7935	25.8876	29.0462	27.1247
AT1G13650	0	0.0231372	0.109591	0.347453	1.5213
AT1G13670	0.0447791	0	0.134306	8.11688	12.9528
AT1G13680	0	0	0	0.00953883	0.00895673
AT1G13690	31.5216	44.7576	43.766	52.0877	29.8058
AT1G13700	0.280104	0.0723765	0.034511	0.221554	0.844657
AT1G13710	0.0548816	0.235971	0.980183	2.43968	6.2998
AT1G13730	2.87153	19.0782	23.4097	45.1295	31.499
AT1G13740	14.8112	6.41226	6.72523	8.63283	11.5141
AT1G13750	0.0590604	0.167866	0.602401	4.07668	5.25465
AT1G13755	0	0.090386	0	0	0
AT1G13760	0	0	0	0	0
AT1G13770	3.94047	11.4139	13.2605	11.5715	8.92863
AT1G13780	8.17441	3.80564	5.56057	5.51423	3.98787
AT1G13790	0.0420631	0.399336	0.537577	1.40738	1.88321
AT1G13800	0.152654	0.239458	0.433946	0.526372	0.668724
AT1G13805	0	0	0	0	0
AT1G13810	5.72098	20.4322	13.1011	11.1242	6.75752
AT1G13820	30.7834	3.08347	3.72015	11.4012	18.013
AT1G13825	0	0	0.0669673	0	0.19851
AT1G13830	0.204024	0.1735	0.383216	2.80099	23.6026
AT1G13860	0.307576	1.66767	2.52492	5.23163	10.4224
AT1G13870	11.3033	24.6093	22.7774	19.5712	16.3737
AT1G13880	8.04162	9.3554	8.73579	12.1556	13.641
AT1G13890	0.28904	0	0	0.0127889	0.0142912
AT1G13900	1.82357	1.51342	2.51748	6.48971	15.2301
AT1G13910	0.427349	4.10632	4.14484	2.53197	3.14258
AT1G13920	0.0697713	0.104288	0.312542	5.30922	2.60684
AT1G13930	16.8371	23.6126	82.3973	95.923	786.232
AT1G13940	0.553293	1.43224	2.51958	3.92243	5.4832
AT1G13950	0.093197	0.790969	1.77368	24.206	33.6968
AT1G13960	31.8723	2.25452	4.17972	6.16065	13.9993
AT1G13970	0.433685	0.420859	1.32052	1.59551	7.43623
AT1G13980	0.962292	2.2646	5.16651	7.59716	11.6612
AT1G13990	114.141	6.15789	8.36877	12.1307	8.86692
AT1G14000	10.9249	12.2373	16.4992	31.9397	42.6131
AT1G14010	3.33388	23.5554	57.5034	84.7084	78.8446
AT1G14020	1.23631	3.52016	6.54526	15.4856	16.7383
AT1G14030	0.803184	14.2386	18.786	21.006	21.4543
AT1G14040	0.824074	2.90924	4.03272	4.79377	7.57746
AT1G14048	0	0	0	0.070862	0
AT1G14060	35.0285	98.8306	59.8157	104.573	49.1388
AT1G14080	0.00954297	0.0216492	0.153738	6.59579	7.25706
AT1G14100	0	0	0	0.0153731	0.011915
AT1G14110	0	0.0782025	0.0671684	0.0366064	0.221262
AT1G14120	0.426413	0.173118	2.81569	34.1811	126.507
AT1G14130	8.33897	4.43791	6.67073	6.76427	10.9208
AT1G14140	2.17112	3.31434	6.58831	18.62	16.6901
AT1G14150	0.558134	0.994908	2.72469	9.38204	20.9088
AT1G14160	0	0	0.0227358	0.0918837	9.98343
AT1G14170	17.045	1.3616	1.95971	8.54846	29.136
AT1G14180	0.0252939	1.52701	3.68344	7.85139	6.8583
AT1G14185	0	0	0	0.0280638	1.11291
AT1G14190	0.0403678	0.010622	0.00715267	0.265189	1.12219
AT1G14200	173.064	13.9516	8.68882	6.49794	6.53424
AT1G14205	5.21114	18.1699	25.1577	9.65989	5.28591
AT1G14210	2.8324	23.523	52.6809	99.4922	78.8776
AT1G14220	0	0	0	1.71713	4.24382
AT1G14230	8.03987	6.2961	9.8708	14.7535	20.9053
AT1G14240	0.027895	0.0181701	0.0867285	0.434077	7.19436
AT1G14250	0.0112502	0	0.0199975	0.00686943	0.0334566
AT1G14260	0	0.120662	0.209847	0.93419	1.88058
AT1G14270	2.75847	13.3089	25.0976	31.8875	41.0331
AT1G14280	0.132761	0.341122	0.129631	1.63667	5.22034
AT1G14290	0.624834	0.967102	7.90043	26.4277	27.6639
AT1G14300	17.3391	31.696	35.0207	26.8693	11.8974
AT1G14310	1.88252	9.32823	7.86914	16.1539	14.1923
AT1G14315	0.0173989	0	0.0294287	0.0106365	0.0120161
AT1G14320	239.987	1481.1	1547.37	1824.63	1249.07
AT1G14330	0.587313	4.1273	5.45836	8.82913	10.3579
AT1G14340	3.01721	8.71986	10.4848	7.37902	13.2222
AT1G14345	0.345137	2.09076	9.47728	41.9859	84.3672
AT1G14350	0.0274218	0.371572	2.06191	5.33069	8.48688
AT1G14360	1.54628	25.9396	49.787	49.6118	44.5577
AT1G14370	0.0937516	1.84259	1.31611	6.03681	10.9398
AT1G14380	1.55869	2.11028	3.05735	6.07978	15.0105
AT1G14390	0.320042	0.393319	0.657039	1.46942	2.6519
AT1G14400	119.043	191.294	203.707	160.199	154.371
AT1G14410	9.18743	42.9425	56.4819	57.5066	39.0413
AT1G14420	0.95586	0.0179828	0	0.0179782	0.0704926
AT1G14430	0.225347	0.156246	0.408732	3.48995	12.7329
AT1G14440	0.310563	13.3749	34.0821	39.0579	39.3498
AT1G14450	36.5092	263.578	324.576	299.074	288.228
AT1G14453	57.8288	417.521	527.377	405.921	441.778
AT1G14455	1.63752	0.653278	0.103058	0.277662	0.268361
AT1G14460	0.0278769	0.582549	1.0679	3.34131	6.96539
AT1G14470	0.85527	0.15388	0.649868	0.806258	0.558766
AT1G14480	0.912075	0.940332	1.40601	1.54967	1.1937
AT1G14490	1.0569	1.46721	1.13664	4.00844	2.891
AT1G14500	0.0751195	0.0137741	0.312855	1.26376	0.29217
AT1G14510	42.5766	85.3382	75.7893	74.039	56.0611
AT1G14520	48.442	57.6797	20.3135	15.7064	5.20816
AT1G14530	44.9765	9.50813	5.16592	5.41641	5.85566
AT1G14540	0.0421774	0.224879	0.469496	21.8411	11.1106
AT1G14550	0.0176053	0	0.0255519	4.97714	0.83467
AT1G14560	2.48512	6.74786	9.30816	14.2774	11.2927
AT1G14570	44.7746	13.9726	20.455	39.815	41.4286
AT1G14580	3.81879	1.34108	4.76147	12.5006	12.6834
AT1G14590	4.42319	4.77186	6.09576	10.0554	8.65114
AT1G14600	1.00079	5.78302	5.93378	6.92927	4.16876
AT1G14610	4.3247	6.91831	14.726	27.1025	35.2622
AT1G14620	14.1465	179.216	187.56	95.2333	47.5191
AT1G14630	0.0257374	1.25437	1.56777	0.245077	0.454775
AT1G14640	0.143286	0.12865	0.225467	0.235157	0.343329
AT1G14642	0	0	0	0	0
AT1G14650	4.36553	3.39056	9.53572	16.4449	20.9416
AT1G14660	2.7917	1.18112	1.63589	1.46904	1.43432
AT1G14670	2.73132	26.7622	80.7002	110.677	132.493
AT1G14680	0.396276	1.31358	1.07814	1.15019	1.63941
AT1G14685	7.41268	12.0745	18.0844	28.4074	29.2638
AT1G14686	0.0439103	0	0.0119356	0.00923727	0.10004
AT1G14687	0.49777	7.65763	11.6989	9.86923	5.86594
AT1G14688	0.0718058	0.045019	0.168633	0	0.0513027
AT1G14690	0.484295	5.30404	6.66774	7.50358	11.4189
AT1G14700	0.0887436	0.175083	0.70927	1.55717	42.5931
AT1G14710	1.6107	4.86402	12.6619	42.1289	50.6258
AT1G14720	17.1996	33.534	32.3842	19.65	29.1625
AT1G14730	0	0.36556	0.721087	0.68658	1.05678
AT1G14740	32.5602	5.13968	8.95103	16.1989	24.4353
AT1G14750	0.0210431	1.32405	4.36526	4.33204	4.32256
AT1G14755	0.510964	2.5451	1.45342	0	0.170908
AT1G14760	5.41483	15.9256	2.49586	0.408835	0.948994
AT1G14770	2.03062	4.08025	4.13078	7.36534	5.2239
AT1G14780	0.00736227	0.077606	0.119415	0.662451	4.45071
AT1G14790	0.0165816	0.116399	0.312472	0.429361	1.21562
AT1G14800	0	0.187027	0.109742	0.127565	0.0345799
AT1G14810	12.2755	54.949	84.7527	132.473	96.8864
AT1G14820	0.396644	7.86272	11.0008	16.305	23.3849
AT1G14830	6.96685	7.1335	16.1964	55.5947	75.5154
AT1G14840	0.36134	1.21133	2.09592	6.13968	12.9213
AT1G14850	4.70871	2.48404	6.75331	8.09462	8.5675
AT1G14860	1.5698	24.7236	42.5145	14.0187	8.86246
AT1G14870	5.33594	4.48808	6.96739	82.1155	90.3418
AT1G14880	0	0	0	0.0312934	0.0293446
AT1G14890	2.52483	3.22763	5.27847	8.78476	18.7901
AT1G14900	2.75358	55.8856	106.343	159.52	101.164
AT1G14910	3.34249	2.50631	4.92239	10.5743	14.9604
AT1G14920	4.18211	8.77441	19.9336	22.6627	18.9149
AT1G14930	723.025	94.3493	41.4903	30.3534	4.96427
AT1G14940	1096.91	94.1689	35.3089	10.9456	3.02768
AT1G14950	5120.12	140.292	73.8649	25.9316	14.462
AT1G14960	20.6943	2.32215	1.22155	0.24049	13.0311
AT1G14970	0.124963	0.701603	2.07628	3.47453	3.86663
AT1G14980	373.124	5269.08	4053.19	2618.9	894.254
AT1G14990	8.86859	29.354	35.5638	31.6732	27.1479
AT1G15000	0.240116	6.27695	8.52828	11.327	17.8558
AT1G15010	11.3708	0.987212	0.547375	1.1093	2.15874
AT1G15015	0.0793909	0	0	0	0
AT1G15020	5.81431	2.98844	6.94065	10.4767	11.9696
AT1G15030	11.7687	4.49772	8.28487	12.2783	13.6785
AT1G15040	0.628235	0.0453359	0.0634479	0.13523	3.01873
AT1G15050	2.18926	0.663285	0.770285	0.305425	15.4711
AT1G15060	9.04783	0.687037	1.67657	4.0494	8.41211
AT1G15080	0.0902984	2.58885	7.90093	4.62709	3.633
AT1G15085	0	0	0	0	0
AT1G15100	50.4847	7.97776	9.62624	23.1996	65.5799
AT1G15110	15.6332	2.59082	4.06006	10.396	15.8389
AT1G15120	65.3994	625.814	895.97	619.331	484.659
AT1G15125	2.56809	0.818459	1.81168	1.51944	1.96749
AT1G15130	14.2926	1.43695	4.74276	11.2992	29.0459
AT1G15140	6.81621	7.17956	20.9994	57.1787	78.5378
AT1G15150	0.028175	0.0198945	0.0888413	0.058507	0.437014
AT1G15160	0.594079	0.703086	0.713813	1.90916	2.0648
AT1G15165	1.33452	0.577091	0.616253	1.44097	3.07945
AT1G15170	4.96127	2.07429	6.09729	15.6482	15.7647
AT1G15180	49.7927	22.1131	32.9225	29.5381	21.3053
AT1G15190	3.1387	0.483837	0.494155	1.66063	1.49009
AT1G15200	11.1499	25.9362	22.3892	23.4873	28.6865
AT1G15210	0.192951	1.5863	8.78658	36.5808	38.04
AT1G15215	0.860819	4.15109	4.50498	6.86938	6.43394
AT1G15220	8.9224	9.74077	13.8251	11.8041	7.94972
AT1G15230	276.732	68.9204	61.0097	63.0266	47.3288
AT1G15240	5.16466	1.51151	2.9286	4.82945	7.33676
AT1G15250	32.0407	814.772	598.728	236.46	88.0621
AT1G15260	0.180063	14.687	18.6988	30.7388	30.7761
AT1G15270	71.7265	750.349	648.778	434.248	399.867
AT1G15280	14.5696	6.24004	7.08996	11.1451	17.8159
AT1G15290	0.213094	2.38705	5.66148	10.3684	24.2213
AT1G15310	2.16251	1.92851	2.08255	4.21313	6.20948
AT1G15320	0.0420593	0.0205527	0	0.0391285	0.0782193
AT1G15330	110.297	5.78099	12.1443	23.0313	6.61278
AT1G15340	42.5865	23.0378	23.5526	25.9557	49.7169
AT1G15350	45.4623	61.9989	76.9428	51.0062	62.8227
AT1G15360	0	0	0	0	0
AT1G15370	18.6745	74.6092	84.9184	83.2061	69.4191
AT1G15380	2.42254	0.683028	0.324852	0.0232632	1.53792
AT1G15385	0.910883	1.4616	3.98103	7.50371	3.37475
AT1G15390	14.7106	49.2809	53.0392	62.7615	38.9892
AT1G15400	79.0785	79.4886	90.4616	63.42	65.8461
AT1G15410	0.542576	4.45376	8.92463	12.2576	10.327
AT1G15415	7.27253	5.7462	0.78975	1.00623	0.501362
AT1G15420	28.4362	81.9334	51.9907	57.8396	31.9679
AT1G15430	68.384	6.81035	10.693	14.8776	12.4492
AT1G15440	7.09156	13.5675	17.8664	20.3822	12.9388
AT1G15460	0.0255574	0.031152	0.0753646	0.0693867	4.04727
AT1G15470	1.95889	3.2544	5.39946	19.0598	24.315
AT1G15480	3.75527	6.71604	6.80273	10.6181	6.99305
AT1G15490	0.394138	0.920365	2.38836	5.49602	6.71284
AT1G15500	23.4396	92.0643	303.684	481.656	257.107
AT1G15510	2.26039	8.21251	9.23415	7.97768	6.17051
AT1G15520	0.0894473	0.252952	0.290801	0.421866	0.489241
AT1G15530	2.67152	0.585204	1.61247	2.4042	4.19932
AT1G15540	0	0.207639	0.0409761	0.0301238	0.0912183
AT1G15550	0.0771175	8.56516	5.16953	8.13946	17.2521
AT1G15570	0.054701	0.371911	2.02904	7.55257	12.4705
AT1G15580	0	0	0.332721	0.117519	3.16578
AT1G15590	0	0	0	0	0
AT1G15600	0	0	0	0	0.0162534
AT1G15610	0	0	0	0.0142285	0
AT1G15620	0	0	0	0	0.0158952
AT1G15625	0	0.021658	0.125441	0.764043	1.30154
AT1G15630	0	0	0	0.274948	0.876883
AT1G15640	0	0.0130937	0	0.188649	2.47317
AT1G15660	1.0472	0.53064	2.02533	8.24662	9.23892
AT1G15670	9.98684	6.54654	14.9698	22.684	18.9416
AT1G15680	0	0	0	0	0
AT1G15690	76.8253	77.0994	282.703	540.902	526.378
AT1G15700	6.28539	5.60513	5.16743	7.16568	6.09805
AT1G15710	2.29844	3.91269	6.41924	18.8808	29.9047
AT1G15720	2.44742	1.19184	1.36653	3.27778	2.84777
AT1G15730	2.60519	8.21264	12.9699	22.9805	23.8182
AT1G15740	43.363	3.8568	5.59043	3.25615	7.45225
AT1G15750	9.49491	5.3272	14.047	23.5861	33.3206
AT1G15757	0	0	0	0	0
AT1G15760	0.0549929	2.86223	4.9755	3.23809	4.27197
AT1G15770	0	0.105822	0.0491227	0.125916	0.0344916
AT1G15772	0.335697	0.833331	0.141564	0.265928	0.263455
AT1G15780	2.54076	0.932337	2.34319	4.12444	9.02752
AT1G15790	1.4532	2.36873	2.06324	2.28381	1.92239
AT1G15800	4.80624	4.31226	5.94613	4.57166	5.07931
AT1G15810	3.27619	13.2975	19.4664	40.6329	34.0099
AT1G15820	2.87083	3.88583	15.6334	199.277	757.556
AT1G15825	0.192047	1.84052	5.67031	12.711	4.8816
AT1G15830	0.123233	0.655951	1.98572	3.84271	3.69786
AT1G15840	23.1282	7.6209	32.1677	44.17	15.4223
AT1G15850	0	0.0351183	0.0499267	0.0338563	0.0382477
AT1G15860	20.0952	46.2099	54.9012	42.0235	40.9221
AT1G15870	4.11542	41.8274	26.9886	15.4171	4.44791
AT1G15880	19.0702	21.7959	41.1623	26.6921	23.9287
AT1G15885	18.1085	93.1648	112.861	35.3933	19.6082
AT1G15890	0.0741462	0.19784	0.173049	0.141845	0.283546
AT1G15900	0.520903	1.77774	3.28895	5.96364	2.38005
AT1G15910	0.25881	2.31541	4.49211	8.57414	12.535
AT1G15920	15.3427	23.721	24.6208	24.9347	15.7628
AT1G15930	49.8381	687.946	992.728	1317.31	601.092
AT1G15940	7.98265	3.48268	3.94085	8.2876	7.88559
AT1G15950	23.4253	19.3963	22.7565	64.4047	157.23
AT1G15960	5.51083	0.263225	0.209898	0.841637	1.57931
AT1G15970	0.116742	0.431604	1.36664	8.98721	13.1937
AT1G15980	0.188052	1.12066	3.45319	12.8161	32.5641
AT1G15990	0	0.00700492	0.0317812	0.0178157	0.0478501
AT1G16000	140.636	547.078	809.961	653.922	320.195
AT1G16010	9.9479	14.0121	16.6321	23.5683	26.6918
AT1G16020	1.05684	1.18788	2.52044	6.6496	11.27
AT1G16022	0.67782	0.227356	3.25989	3.92687	1.48133
AT1G16025	0.173502	0	2.0418	4.61121	1.91651
AT1G16030	233.246	2.43835	5.8579	3.75538	3.83918
AT1G16040	32.0859	54.4711	53.8227	29.6897	17.9263
AT1G16060	0.0738489	2.6006	2.64529	4.24507	5.61502
AT1G16070	0	0.0067192	0.0435677	1.13341	5.60497
AT1G16080	6.9663	13.4009	24.8589	48.2619	87.3443
AT1G16090	1.71947	0.422553	0.921836	0.444688	0.593988
AT1G16110	0.00717077	0.0038645	0	0.142147	0.407091
AT1G16120	0.0192147	0.00335287	0	0.0076066	0.0771476
AT1G16130	0.0341333	0.00710552	0.0102455	0.269118	0.489429
AT1G16150	0.00653357	0.00397537	0.0104462	0.13738	0.0416126
AT1G16160	0.013586	0.00393917	0.00490693	0.20404	0.289295
AT1G16170	3.57924	71.9631	110.292	67.3756	58.0907
AT1G16180	40.7371	51.8788	82.0589	73.0124	112.877
AT1G16190	7.35798	9.53481	15.8805	38.8889	31.7729
AT1G16210	88.7222	18.737	23.2378	50.2998	77.1841
AT1G16220	0.329407	0.920042	1.02524	1.82998	2.80644
AT1G16225	0	0	0	0.060922	0.106313
AT1G16230	0	0	0	0.329396	0.644552
AT1G16240	157.648	18.2651	27.1363	45.4997	58.3825
AT1G16250	2.82967	2.88879	3.29939	3.47044	4.47078
AT1G16260	0.241683	0.0984207	0.286389	1.32716	1.60826
AT1G16270	6.52736	3.30531	7.18187	9.21845	10.0482
AT1G16280	7.02905	23.1991	20.3072	23.2023	15.6515
AT1G16290	0.0910913	0	0	0.0291166	0.0225953
AT1G16300	9.48509	7.25819	10.8876	27.8612	20.6469
AT1G16310	0.0166246	0.00614487	0.0692262	0.418141	5.1584
AT1G16320	15.4623	25.4779	32.8002	19.2058	18.012
AT1G16330	0.258649	0.0927714	0.312777	1.91499	4.06062
AT1G16340	1.62053	12.0052	13.6243	17.4913	20.3323
AT1G16350	14.2018	38.7952	42.0159	66.7813	80.328
AT1G16360	0.0779196	2.56764	9.43851	3.88869	0.858683
AT1G16370	0.0618188	0.0497096	0.141038	3.716	7.81246
AT1G16380	0	0.0036436	0	0.00723273	0.0270877
AT1G16390	0.200729	0.485438	1.10656	33.3644	39.9113
AT1G16400	0.11958	0.0629844	0.385625	0.0845556	12.8893
AT1G16410	0	0	0.00828983	0.00534823	0.420478
AT1G16420	0.00954993	0.00830677	0	0.0853553	1.59612
AT1G16430	13.478	77.8842	72.7756	26.2929	13.2337
AT1G16440	0.266171	0.0220508	0.0311922	0.648355	6.01743
AT1G16445	1.05198	7.7135	9.82364	13.8946	8.2882
AT1G16460	16.2661	19.6551	21.7161	29.1986	30.6304
AT1G16470	100.556	221.419	228.714	160.938	119.043
AT1G16480	0.247997	0.557659	0.767007	1.37748	1.11351
AT1G16490	0.136857	1.79311	2.3202	1.75358	1.6488
AT1G16500	0.153457	6.6196	7.75284	7.17205	4.02544
AT1G16510	85.8052	1.38571	2.26628	1.42884	6.20221
AT1G16515	16.1786	23.8295	18.651	14.9148	10.0242
AT1G16520	1.21137	21.7653	41.8371	67.7007	46.1966
AT1G16530	0.0604933	0.0223599	0.065546	0.123237	2.44975
AT1G16540	6.32118	1.88014	1.93973	2.38136	3.6804
AT1G16560	7.0371	24.2913	49.2294	52.0719	57.125
AT1G16570	1.82259	4.74585	7.95505	12.9423	12.5827
AT1G16590	5.03927	16.2133	12.4932	6.59051	3.32884
AT1G16610	14.2341	12.8465	27.2793	42.9078	40.5611
AT1G16630	0.0284495	0.125978	0.0918214	1.619	5.92457
AT1G16640	0	2.55094	4.78582	3.70732	3.66143
AT1G16650	7.27869	7.25519	8.64016	5.15873	3.7869
AT1G16670	4.20182	2.7429	2.16454	6.42682	6.68416
AT1G16680	6.20384	7.17096	6.97915	7.60622	8.68608
AT1G16690	0.942746	0.831002	2.12862	4.66933	4.15696
AT1G16700	43.6192	54.8767	69.2521	123.069	160.303
AT1G16705	0.182998	0.0350033	0.0585527	0.177932	0.391503
AT1G16710	1.64194	0.64997	1.63463	2.26086	4.18834
AT1G16720	3.24109	2.31543	4.47858	14.631	27.7763
AT1G16730	717.06	84.6987	35.049	9.92324	3.76274
AT1G16740	65.0331	335.456	272.633	139.817	81.9582
AT1G16750	0.795524	0.370215	1.61446	4.65153	8.75137
AT1G16760	0.00432717	0	0	0	0.00405487
AT1G16770	148.209	2.5439	2.07129	1.26822	0.393726
AT1G16780	0.164826	1.41486	3.50725	7.23424	9.05355
AT1G16790	31.2042	176.006	147.242	84.8027	49.463
AT1G16800	0.239408	0.334492	0.769181	0.943295	1.02896
AT1G16810	118.783	291.645	276.479	187.783	127.691
AT1G16820	2.6013	7.25674	6.45975	2.11811	3.30768
AT1G16825	2.97357	16.629	21.9832	17.8614	10.9825
AT1G16830	0.586104	3.46075	2.18389	2.28981	1.56363
AT1G16840	98.334	14.9217	26.3746	32.1743	42.4618
AT1G16850	252.431	18.4032	11.0271	12.6832	5.83572
AT1G16860	6.221	2.50157	6.5272	20.2414	34.1545
AT1G16870	4.72454	24.559	31.5332	46.4241	41.6486
AT1G16880	0.569971	9.23355	33.7318	75.9554	129.567
AT1G16890	78.1005	295.923	378.523	219.466	172.706
AT1G16900	1.45771	4.57555	8.38796	14.4307	12.9734
AT1G16905	0	0	0.0493485	0.768484	2.80862
AT1G16910	0.0761726	0	0	0	0.383483
AT1G16916	17.4466	59.8278	60.8076	43.1278	27.5248
AT1G16920	5.05165	36.1658	74.0209	133.607	104.317
AT1G16930	4.22364	1.90225	3.58477	5.35092	6.61523
AT1G16940	0	0	0	0	0
AT1G16945	0	0	0	0	0
AT1G16950	0	0	0	0	0
AT1G16960	0.0849687	0.255611	0.918579	0.986853	3.49266
AT1G16970	2.96247	11.2525	11.4234	8.69375	7.48865
AT1G16980	0.0174171	0.00693083	0	0	0
AT1G17000	0	0	0	0	0
AT1G17010	242.471	2.34867	5.79285	6.05751	0.570578
AT1G17020	48.8053	66.6368	126.511	104.502	16.5651
AT1G17030	0.0197777	0.010207	0.00748027	0.0995666	0.450318
AT1G17040	1.80825	1.20559	1.54845	1.78837	1.98693
AT1G17050	4.18323	3.16746	5.01899	20.3443	30.2931
AT1G17060	4.9588	2.18448	1.56692	4.80815	10.5921
AT1G17065	2.88262	2.59604	1.31181	4.73547	8.13404
AT1G17070	1.10022	1.20719	1.56621	3.36869	5.6638
AT1G17080	290.047	59.4137	59.9895	63.1331	93.4719
AT1G17090	117.503	24.8509	18.7267	9.85843	19.7772
AT1G17100	104.308	15.7678	19.4987	72.5704	116.941
AT1G17110	5.58898	5.6323	7.92794	11.5632	13.1248
AT1G17120	0.349553	1.94722	5.71354	10.5855	14.8182
AT1G17130	31.157	30.8525	31.4105	37.7568	36.8157
AT1G17140	0.28316	0.220457	0.887449	4.57404	25.2918
AT1G17145	79.2326	11.0862	9.88213	9.69235	9.95438
AT1G17147	16.4767	5.84511	3.67702	4.46985	1.0816
AT1G17150	0.0122826	0	0	0.00795217	0.0074669
AT1G17160	6.78024	11.9086	18.0083	25.4655	26.2303
AT1G17170	9.11828	9.26203	9.93674	12.588	27.0892
AT1G17180	0.14014	0.785137	3.51754	39.6139	53.2428
AT1G17190	4.42844	13.5756	31.6605	76.7712	115.971
AT1G17200	3.50111	234.012	305.771	209.61	211.436
AT1G17210	9.3706	1.65951	6.30057	13.2424	22.9378
AT1G17220	2.32042	3.966	9.13453	23.5938	59.5314
AT1G17230	0.151078	0.102608	0.426148	2.18122	3.87678
AT1G17235	0	0.637031	0.589542	0.892803	1.16254
AT1G17240	0.0590656	0.071472	0.175892	0.215914	0.224678
AT1G17250	0.259082	0.427862	0.422356	1.17363	1.14035
AT1G17260	0.0925963	0.0826876	0.0634639	0.209438	0.821959
AT1G17270	1.16465	1.50383	3.14819	6.45278	5.11452
AT1G17280	23.8194	47.516	48.8358	29.3295	28.5884
AT1G17285	0.687164	58.0162	51.8189	25.049	7.37854
AT1G17290	20.1874	12.1115	27.4124	75.1372	95.3579
AT1G17300	0.0557987	0	0	1.12807	4.83915
AT1G17310	0	0.0289671	0	0.108202	2.29649
AT1G17330	6.75729	18.2359	12.1514	13.0736	8.87464
AT1G17340	0.490547	0.334283	0.978056	2.64202	6.67438
AT1G17345	0.772033	15.9156	12.4691	14.1361	7.54879
AT1G17350	6.61665	22.4338	22.259	29.3083	19.4861
AT1G17360	0.131726	0.589198	1.17586	4.89837	8.37752
AT1G17370	32.2623	16.1306	25.5565	48.779	44.2614
AT1G17380	0.120746	0	0	0.265247	1.00836
AT1G17400	0	0	0.214899	0.434201	1.67142
AT1G17410	13.3248	24.7451	28.4196	13.0504	7.83576
AT1G17420	0.190714	0.0781081	0.073584	0.476658	1.20122
AT1G17430	10.1658	1.47259	2.22941	7.61847	8.18119
AT1G17440	3.91963	2.91924	4.89897	6.23938	10.8166
AT1G17450	2.26753	1.39336	1.58247	1.83962	3.27028
AT1G17455	6.61996	37.8948	53.937	31.4847	22.2779
AT1G17460	1.52999	9.84727	8.74314	5.80973	2.26775
AT1G17470	23.2881	43.3783	57.0732	73.8362	58.8856
AT1G17480	0.183249	0.22748	0.401618	1.29961	3.28567
AT1G17490	37.1712	216.991	111.996	67.2386	44.6547
AT1G17500	0.224028	0.890032	2.42974	7.64691	14.5529
AT1G17510	72.6105	181.83	149.47	79.0149	50.2376
AT1G17520	40.2898	16.9127	16.8569	10.9544	10.1394
AT1G17530	249.831	23.572	24.5871	53.4169	44.0348
AT1G17540	0.167886	0.0334122	0.0105547	0.114629	0.0893704
AT1G17545	0	0	0	0	0
AT1G17550	9.16071	4.4624	6.86751	9.79006	13.9278
AT1G17560	0.22167	15.8384	24.0874	23.8193	15.0668
AT1G17580	4.43393	1.29622	2.95426	4.10225	6.58368
AT1G17590	1.43127	4.04423	4.93063	2.06303	1.89088
AT1G17600	0.0145369	0.140439	0.166792	0.314511	0.49163
AT1G17610	0.0328501	0.0627557	0.0197206	0.123428	0.146154
AT1G17615	0	0	0	0	0
AT1G17620	10.2089	4.32865	7.10356	37.5083	77.858
AT1G17630	0.301487	0.95123	1.30902	2.00674	1.99691
AT1G17640	22.3148	3.49629	5.20967	6.00795	4.35253
AT1G17650	2.68832	57.2723	121.413	111.358	80.3825
AT1G17665	9.73262	13.4257	15.6624	5.2504	5.60295
AT1G17680	10.5892	3.9072	4.70107	4.88053	6.30272
AT1G17690	6.73712	7.31834	8.48711	15.1085	13.1603
AT1G17700	0.0360623	0.0457353	0.214923	5.9591	9.2013
AT1G17710	0.105631	0	0.200107	6.29965	6.01021
AT1G17720	6.91825	17.5035	33.9633	48.4139	52.324
AT1G17730	3.8473	22.9072	35.1781	38.2626	39.4925
AT1G17744	0.088633	0.157372	1.15822	8.61414	64.4296
AT1G17745	0.114799	0.0630104	0.7385	11.4811	63.8141
AT1G17750	0.0172882	0.100652	0.211564	0.407643	1.02049
AT1G17760	8.78611	3.67547	4.27819	7.91648	8.56633
AT1G17770	0.0131762	0	0	0	0.00905057
AT1G17780	11.8126	6.99527	3.63532	6.03096	9.50996
AT1G17790	2.4941	1.92911	2.39385	3.56228	4.03991
AT1G17800	0	0.0298465	0	0	0
AT1G17810	1763.54	16.8176	22.2874	9.86995	4.485
AT1G17820	1.0473	0.856197	1.69433	2.79673	5.03843
AT1G17830	5.17073	2.47977	1.56088	3.2703	8.3774
AT1G17840	0.852158	8.81939	13.1755	34.1257	48.2631
AT1G17850	0.679839	6.0213	12.151	20.9849	20.4968
AT1G17860	11.1308	15.4022	10.0095	109.493	114.473
AT1G17870	7.4597	4.33119	3.00076	1.36341	1.72609
AT1G17880	110.261	389.032	485.846	695.147	455.641
AT1G17890	4.85962	12.308	19.8745	84.3563	100.056
AT1G17910	0	0	0	0.00745013	0
AT1G17920	0.156515	0.983804	2.52696	4.81098	6.86976
AT1G17930	6.19683	5.47295	5.66538	5.36774	5.24964
AT1G17940	0.804257	1.7156	1.9379	3.93367	6.85534
AT1G17950	0.0225144	0	0	0.177478	0.438065
AT1G17960	0.030603	0.0130024	0	0.0333299	0.598708
AT1G17970	0.336623	0.985773	1.21462	3.41004	12.3051
AT1G17980	3.12565	3.33273	5.16479	9.14971	12.8491
AT1G17990	14.9208	0.741755	0.981395	4.24098	14.7174
AT1G18000	0.414857	0.421456	2.3204	7.98516	10.2123
AT1G18010	0.414857	0.421456	2.3204	7.98516	10.2123
AT1G18020	14.9208	0.741755	0.981395	4.24098	14.7174
AT1G18030	5.06668	6.96594	6.94867	7.92862	7.7801
AT1G18040	0.087689	0.679629	1.71275	5.55695	6.77106
AT1G18050	0.0189995	0	0	0	0.035998
AT1G18060	3.63555	7.8141	11.0156	30.7485	48.1479
AT1G18070	27.6217	24.9536	32.9717	70.7628	89.8249
AT1G18080	68.9589	307.78	605.736	898.717	676.862
AT1G18090	0.259986	4.99018	7.16283	12.5487	8.46639
AT1G18100	18.5435	5.09919	1.22291	0.732824	9.42306
AT1G18130	0	0	0	0	0
AT1G18140	0.00801903	0.0360563	0.0477916	0.0819535	1.736
AT1G18150	2.09607	3.24946	4.63882	14.7097	32.977
AT1G18160	3.1495	2.70634	4.0467	6.89173	11.7139
AT1G18170	3.46657	8.11119	9.66484	16.1542	25.7315
AT1G18180	0.443622	0.541528	1.07385	2.42609	8.13072
AT1G18190	2.33829	2.48406	4.24396	6.90531	9.14396
AT1G18193	0.423649	0.672959	0.553219	3.00364	2.76885
AT1G18197	0.0878037	0	0	0	0.239127
AT1G18200	0.0711864	0.0287901	0.0878857	0.0154456	0.248443
AT1G18210	31.6469	12.2533	38.9219	117.755	115.282
AT1G18220	0	0	0	0	0
AT1G18250	0.763386	12.5216	45.396	76.31	66.3071
AT1G18260	10.7276	3.82078	7.77882	14.7137	21.1488
AT1G18265	0.678231	2.868	6.97543	3.52682	8.4443
AT1G18270	2.47923	0.895022	1.56828	2.79379	8.63117
AT1G18280	0.252238	0.0627509	0	0.84419	0.541654
AT1G18290	0.166578	0.328855	0.222692	2.49218	5.15499
AT1G18300	8.6115	9.44708	8.57394	5.55099	6.29187
AT1G18310	0	0	0	0.0178361	0.00978583
AT1G18320	0.997698	12.4579	8.73811	7.00515	2.14395
AT1G18330	17.1392	9.17467	12.3447	14.7927	14.2827
AT1G18335	9.9585	4.58542	5.95359	6.74554	7.20075
AT1G18340	1.1948	7.64216	11.9486	17.2918	13.2952
AT1G18350	0.0186252	0.00922153	0.0135161	0.0110782	0.0312065
AT1G18360	3.66602	4.75079	5.33412	6.27713	8.19181
AT1G18370	0.0451009	0.0403319	0.143378	2.97883	13.5621
AT1G18390	0.14692	0.18468	0.179678	1.18023	2.21749
AT1G18400	0.0212422	0.024918	0.105417	0.148214	3.62122
AT1G18410	0	0.0090263	0.00300311	0.024642	0.649128
AT1G18420	0.0553357	0.0768743	0.476823	3.56799	16.8297
AT1G18440	5.74857	6.48668	12.6537	20.0169	17.8448
AT1G18450	23.6971	27.781	31.1931	36.0834	30.0059
AT1G18460	6.867	6.12647	7.2242	5.92763	5.92626
AT1G18470	7.54277	3.49269	4.13066	4.44293	9.52486
AT1G18480	3.17889	6.53412	8.14064	20.2399	18.8884
AT1G18485	0.121287	0.619953	1.15382	1.84936	3.16531
AT1G18486	0.142703	0.049788	0	0.675854	0.155593
AT1G18490	9.9315	8.34794	12.4084	15.6333	13.314
AT1G18500	33.9259	12.747	17.2135	30.6609	40.0405
AT1G18510	0.0886506	0.0244	0	0	0
AT1G18520	0	0	0	0	0.0274706
AT1G18530	0.065773	0.0286055	0	0.283522	0.0619715
AT1G18540	68.2903	1015.82	1548.55	1280.03	787.044
AT1G18550	0.0530481	0.197342	0.571189	2.52001	5.49735
AT1G18560	0.258738	1.06021	1.16894	1.67461	1.94796
AT1G18570	0.073322	0.422803	0.585103	4.64788	3.74097
AT1G18580	0.707574	2.07508	4.69151	13.5283	14.9838
AT1G18590	0.0575485	0.508479	3.57366	8.50279	15.1457
AT1G18600	2.23515	5.45303	9.2034	22.0885	21.8007
AT1G18610	3.31275	1.27192	2.55613	3.48675	4.27386
AT1G18620	0.19489	0.204675	0.505373	2.18105	6.49111
AT1G18630	6.75103	45.2102	45.0236	40.3646	28.9033
AT1G18640	3.30771	15.0746	22.9916	56.2887	49.5719
AT1G18650	0.861311	43.7606	68.8931	59.7686	47.648
AT1G18660	2.30494	7.36647	8.47936	12.7256	20.096
AT1G18670	0.192339	0.365984	0.888801	3.81938	8.36528
AT1G18680	1.99474	10.2364	17.0206	16.1848	12.4803
AT1G18690	0.283148	0.710315	1.06551	3.69684	4.04095
AT1G18700	6.74885	7.39578	11.1447	14.9755	15.0984
AT1G18710	0.0298968	0.0481062	0.0898106	0.193771	2.71463
AT1G18720	88.8638	24.7397	33.0062	82.5488	133.994
AT1G18730	0.40414	3.02978	6.96372	25.8625	58.1865
AT1G18740	2.44837	3.88468	2.68419	12.1576	22.1711
AT1G18750	2.08248	1.5701	0.918963	0.687358	0.674427
AT1G18760	0	0	0.0234949	0	0
AT1G18770	0	0	0	0	0
AT1G18773	2.21308	3.68376	3.87269	3.32351	6.72841
AT1G18780	0	0.019128	0	0	0.0109981
AT1G18790	0	0	0	0	0
AT1G18800	39.1118	355.9	209.755	99.7176	52.2128
AT1G18810	0.0128554	0.0069281	0	0.14634	1.97993
AT1G18830	0.0287167	0	0	0.0163894	0.0331835
AT1G18835	0	0	0	0.109968	5.39307
AT1G18840	3.99755	15.0746	24.6752	39.8166	37.7253
AT1G18850	13.6797	35.754	22.9987	30.3266	13.541
AT1G18860	0.0065157	0	0	0.178061	1.58949
AT1G18870	0.0545051	0.0147668	0.230566	0.932775	6.67893
AT1G18871	0	0	0	0	0.42212
AT1G18880	0.0439662	0.0230916	0.0748149	0.650103	9.58701
AT1G18890	3.96552	1.78973	3.27688	9.26178	15.4405
AT1G18900	3.34885	2.37866	3.07339	6.5553	7.44287
AT1G18910	0.0566004	0.402194	0.643721	2.0668	5.19318
AT1G18940	3.13683	0.28401	0.328219	0.32272	2.37679
AT1G18950	2.05643	1.97249	3.18074	6.29063	9.84802
AT1G18960	0.0668354	0.00922153	0	0.0104604	0.0208043
AT1G18970	0.0194909	0	0	0.0173097	0.248658
AT1G18975	0	0	0.488913	0.351123	0.329695
AT1G18980	0.0485928	0	0.0211188	1.04182	11.9729
AT1G18990	0.627899	0.049082	0.0528686	0.10471	0.0536657
AT1G19000	134.639	26.287	42.3233	47.5293	91.4964
AT1G19010	1.98276	4.15554	4.35671	6.13357	5.46861
AT1G19020	0.816103	1.25018	0	8.96998	11.8517
AT1G19025	0.357498	1.8575	1.87779	2.12474	1.99541
AT1G19040	0	0	0	0	0
AT1G19050	0.0508275	0.357721	0.967001	3.38911	11.9202
AT1G19060	0	0	0	0	0
AT1G19070	2.20519	3.96539	5.539	3.21633	2.02129
AT1G19080	5.40008	27.6782	23.7187	14.0112	10.3877
AT1G19086	0	0	0	0	0
AT1G19090	0.0150551	0	0	0	0
AT1G19100	1.85958	2.02599	2.45592	3.03586	3.78533
AT1G19110	5.46545	1.98745	2.86096	4.66486	11.9986
AT1G19115	0.0740623	2.44194	3.5105	1.67545	0.89063
AT1G19120	14.2821	96.53	80.7316	59.4276	43.1706
AT1G19130	19.5051	51.4126	55.7092	62.8708	64.4253
AT1G19140	40.3026	8.10326	13.2094	33.0455	38.1171
AT1G19150	0.112064	0.127926	2.11279	12.5932	45.6081
AT1G19160	0	0.00872407	0.0245699	0.0182851	0.0388188
AT1G19170	3.51318	4.24642	4.79496	10.8934	12.3943
AT1G19180	2.22349	5.87048	10.7331	37.6417	46.7564
AT1G19190	0.324558	0.226533	0.197164	0.938693	2.91549
AT1G19200	0.989356	0.439589	0.42411	1.4728	4.43533
AT1G19210	0.050383	0.0426653	0	0.0434971	0.0918261
AT1G19220	0.291365	0.469875	1.16911	1.7499	4.27508
AT1G19230	1.28938	0.790325	0.842099	1.32563	5.95972
AT1G19240	15.3268	138.392	120.019	61.7938	29.8179
AT1G19250	0.0307736	0.0109877	0.0070295	0.174997	0.825937
AT1G19260	0	0.0115482	0.0139	0.019465	0.0040585
AT1G19270	0.645229	1.63148	2.32766	3.069	4.90628
AT1G19290	0.795255	1.40654	1.83063	2.9215	3.02286
AT1G19300	0.423312	0.242763	1.39799	2.59361	6.88445
AT1G19310	9.09463	6.58231	9.87074	8.57202	8.20114
AT1G19320	0.0331882	0.0136703	0.0205203	0.0242213	0.03127
AT1G19330	0.0556441	0.0816966	0.300903	0.518562	3.51171
AT1G19340	0.475651	2.47467	2.28107	2.41579	2.00527
AT1G19350	0.624379	2.47731	6.85154	24.54	46.2142
AT1G19360	1.9418	3.66878	7.80016	37.259	43.5213
AT1G19370	2.3124	3.48841	4.79754	11.1251	13.351
AT1G19380	5.35731	10.0271	3.82329	43.2485	30.0107
AT1G19390	0	0	0	0	0.00390897
AT1G19394	3.99293	3.71797	3.89238	2.80199	1.97194
AT1G19396	0	0	0	0	0
AT1G19397	4.92352	7.84142	7.68791	2.55937	2.91055
AT1G19400	13.413	6.88115	7.95959	11.168	12.1133
AT1G19410	0.0081549	0	0	0	0.00680033
AT1G19430	2.12169	4.32613	4.1365	8.04051	13.1258
AT1G19440	10.9173	5.4359	7.26582	20.3424	28.0609
AT1G19450	1.15347	21.9195	19.0214	50.9761	59.0194
AT1G19460	0	0.00747767	0	0.0125481	0.0153128
AT1G19470	0	0	0	0	0
AT1G19480	2.29137	0.934952	2.05948	4.0132	5.29812
AT1G19485	2.98368	3.02583	3.61414	3.97928	4.47217
AT1G19490	44.1368	16.1097	17.3197	9.00353	4.24175
AT1G19500	12.3394	0.591328	1.11998	0.15632	0
AT1G19510	0	0	0	0.645797	0.0814627
AT1G19520	2.39857	4.01739	7.07774	19.3356	22.1578
AT1G19530	369.606	154.025	122.441	17.3766	11.7359
AT1G19540	248.846	7.79432	11.3783	10.9102	6.5557
AT1G19550	5.63505	0.466864	0.504639	0.452373	0.57438
AT1G19565	0.13646	0.0449703	0.0659137	0.0350123	0.321938
AT1G19570	85.0828	119.478	111.029	142.436	622.207
AT1G19580	11.9332	29.0966	34.0215	48.0328	49.0286
AT1G19600	31.2854	44.8278	47.6811	52.8433	62.7923
AT1G19610	8.36142	16.5751	9.49228	2.15126	0.559224
AT1G19620	0	0.0478654	0	0.0313208	0.740155
AT1G19630	0.846651	1.13936	1.06661	0.8315	1.8619
AT1G19640	0	0.0206558	0.0648281	0.283926	0.891012
AT1G19650	2.8351	2.59987	2.58204	2.95175	5.41212
AT1G19660	127.955	9.32352	14.0466	10.6914	11.4066
AT1G19670	0.0814197	0.832394	4.45628	7.66977	21.7323
AT1G19680	11.8593	6.22918	10.8703	14.5718	12.5849
AT1G19690	2.2915	11.1676	13.9037	15.9736	17.0925
[truncated: 25,657 more rows]

## Sheet: ST1C
Supplemental Table 1C. List of genes expressed at 0 h in Arabidopsis and barley. Expressed was defined as having TPM>1 in ALL replicates at 0 h.
HORVU	TPM		AGI	TPM
HORVU0Hr1G000030	14.9451		AT1G01010	1.82529
HORVU0Hr1G000080	220.96		AT1G01020	4.87667
HORVU0Hr1G000100	52.0056		AT1G01050	12.967
HORVU0Hr1G000200	182.317		AT1G01080	2.97716
HORVU0Hr1G000210	169.953		AT1G01090	2.10674
HORVU0Hr1G000250	5.00209		AT1G01100	260.02
HORVU0Hr1G000270	14.4992		AT1G01160	81.004
HORVU0Hr1G000280	11.6471		AT1G01170	863.494
HORVU0Hr1G000320	31.2482		AT1G01180	9.9703
HORVU0Hr1G000340	5.61803		AT1G01200	1.73044
HORVU0Hr1G000350	3.73938		AT1G01210	30.2452
HORVU0Hr1G000370	2.27037		AT1G01230	53.2664
HORVU0Hr1G000390	5.49104		AT1G01240	100.039
HORVU0Hr1G000410	36.0173		AT1G01250	2.2551
HORVU0Hr1G000440	7.86019		AT1G01260	2.34803
HORVU0Hr1G000510	34.5331		AT1G01290	1.6016
HORVU0Hr1G000600	13.4194		AT1G01300	14.6927
HORVU0Hr1G000610	2.38787		AT1G01310	1.80223
HORVU0Hr1G000630	14.3808		AT1G01320	2.69981
HORVU0Hr1G000660	2.31961		AT1G01350	59.0811
HORVU0Hr1G000670	3.82797		AT1G01355	2.35935
HORVU0Hr1G000710	5.78175		AT1G01360	20.2456
HORVU0Hr1G000780	6.94768		AT1G01450	3.16238
HORVU0Hr1G000810	1.92044		AT1G01470	1524.85
HORVU0Hr1G000940	38.0636		AT1G01480	10.2221
HORVU0Hr1G000990	5.38368		AT1G01490	2.83542
HORVU0Hr1G001050	39.7421		AT1G01500	16.1533
HORVU0Hr1G001120	38.0237		AT1G01510	1.86875
HORVU0Hr1G001160	2.17799		AT1G01520	8.52042
HORVU0Hr1G001270	261.727		AT1G01540	1.41657
HORVU0Hr1G001300	39.7421		AT1G01550	30.9121
HORVU0Hr1G001340	82.6939		AT1G01580	1.35866
HORVU0Hr1G001350	46.1276		AT1G01620	2.11489
HORVU0Hr1G001390	4.58282		AT1G01640	3.18714
HORVU0Hr1G001400	23.2873		AT1G01650	21.1446
HORVU0Hr1G001440	25.3217		AT1G01710	9.87811
HORVU0Hr1G001450	29.5789		AT1G01715	7.15959
HORVU0Hr1G001460	8.67383		AT1G01720	487.494
HORVU0Hr1G001510	71.202		AT1G01725	78.4661
HORVU0Hr1G001530	5.56841		AT1G01730	42.561
HORVU0Hr1G001570	192.381		AT1G01770	2.48507
HORVU0Hr1G001590	61.9556		AT1G01780	3.61781
HORVU0Hr1G001740	30.3032		AT1G01800	39.7378
HORVU0Hr1G001970	99.5447		AT1G01810	5.21874
HORVU0Hr1G002020	7.09833		AT1G01820	73.0877
HORVU0Hr1G002090	2.86773		AT1G01840	1.99838
HORVU0Hr1G002120	3.03709		AT1G01860	2.28154
HORVU0Hr1G002130	17.6333		AT1G01910	18.6348
HORVU0Hr1G002220	22.6286		AT1G01920	5.85881
HORVU0Hr1G002350	16.9338		AT1G01930	10.2144
HORVU0Hr1G002530	3.6806		AT1G01940	14.9882
HORVU0Hr1G002680	37.3911		AT1G01960	3.14084
HORVU0Hr1G002690	10.2173		AT1G01970	36.2373
HORVU0Hr1G002710	1.66561		AT1G01990	15.4198
HORVU0Hr1G002730	160.469		AT1G02020	2.49625
HORVU0Hr1G002870	4.43656		AT1G02050	3.69522
HORVU0Hr1G002930	1.90685		AT1G02060	2.10045
HORVU0Hr1G002960	8.43386		AT1G02080	4.33383
HORVU0Hr1G003010	1.82883		AT1G02090	31.4087
HORVU0Hr1G003040	6.03024		AT1G02100	16.7681
HORVU0Hr1G003050	1.95711		AT1G02110	3.88028
HORVU0Hr1G003110	1.9566		AT1G02120	12.108
HORVU0Hr1G003190	7.52847		AT1G02130	16.4308
HORVU0Hr1G003200	15.5621		AT1G02140	251.61
HORVU0Hr1G003220	22.892		AT1G02145	4.03358
HORVU0Hr1G003240	23.6297		AT1G02150	31.931
HORVU0Hr1G003260	9.03561		AT1G02160	2.53288
HORVU0Hr1G003270	1.88107		AT1G02170	4.35771
HORVU0Hr1G003330	6.96256		AT1G02260	1.96063
HORVU0Hr1G003380	13.9438		AT1G02270	3.06684
HORVU0Hr1G003460	8.23531		AT1G02280	52.6001
HORVU0Hr1G003490	5.5987		AT1G02305	36.8323
HORVU0Hr1G003540	12.7884		AT1G02310	25.028
HORVU0Hr1G003640	2.33415		AT1G02330	16.7092
HORVU0Hr1G003650	27.0032		AT1G02370	3.92913
HORVU0Hr1G003870	13.4818		AT1G02380	32.3661
HORVU0Hr1G003890	2.43522		AT1G02400	2.96569
HORVU0Hr1G003900	14.8323		AT1G02405	1.47277
HORVU0Hr1G003910	8.42244		AT1G02410	14.3056
HORVU0Hr1G004090	6.62083		AT1G02475	2.22448
HORVU0Hr1G004110	24.9216		AT1G02500	2.24498
HORVU0Hr1G004130	888.148		AT1G02560	24.0496
HORVU0Hr1G004150	2908.55		AT1G02610	11.4414
HORVU0Hr1G004160	25.9367		AT1G02660	4.06992
HORVU0Hr1G004200	7.72602		AT1G02680	30.0889
HORVU0Hr1G004270	2.07591		AT1G02690	4.89976
HORVU0Hr1G004320	9.11558		AT1G02700	725.019
HORVU0Hr1G004330	46.3377		AT1G02705	1.78449
HORVU0Hr1G004350	14.9729		AT1G02740	7.35984
HORVU0Hr1G004400	4.16402		AT1G02750	45.72
HORVU0Hr1G004420	3.34122		AT1G02770	12.7474
HORVU0Hr1G004470	25.3679		AT1G02780	258.155
HORVU0Hr1G004480	121.603		AT1G02790	20.4302
HORVU0Hr1G004690	5.10043		AT1G02810	1.46445
HORVU0Hr1G004700	657.096		AT1G02816	45.4582
HORVU0Hr1G004730	4.36121		AT1G02840	52.5753
HORVU0Hr1G004790	6.46135		AT1G02850	115.931
HORVU0Hr1G004850	3.19131		AT1G02860	3.40258
HORVU0Hr1G005020	2.55411		AT1G02870	54.3389
HORVU0Hr1G005070	14.4647		AT1G02880	11.0042
HORVU0Hr1G005100	2.68948		AT1G02890	32.7975
HORVU0Hr1G005140	12.8196		AT1G02910	8.78411
HORVU0Hr1G005190	5.77244		AT1G02920	3.22442
HORVU0Hr1G005250	5.51882		AT1G02930	7.13768
HORVU0Hr1G005320	2.79753		AT1G02960	6.39815
HORVU0Hr1G005400	27.169		AT1G02990	1.37173
HORVU0Hr1G005500	11.651		AT1G03000	1.07802
HORVU0Hr1G005520	5.47532		AT1G03030	48.6207
HORVU0Hr1G005570	4.40825		AT1G03040	8.92863
HORVU0Hr1G005580	17.0757		AT1G03090	9.02294
HORVU0Hr1G005650	23.3016		AT1G03106	61.6947
HORVU0Hr1G005670	15.0893		AT1G03110	1.88408
HORVU0Hr1G005720	12.6933		AT1G03120	28.712
HORVU0Hr1G005760	15.7554		AT1G03130	6.55604
HORVU0Hr1G005770	6.31853		AT1G03140	41.9359
HORVU0Hr1G005820	153.764		AT1G03150	8.16518
HORVU0Hr1G005860	2.20342		AT1G03160	1.81967
HORVU0Hr1G005960	35.0153		AT1G03180	3.42683
HORVU0Hr1G006020	146.673		AT1G03190	2.82549
HORVU0Hr1G006030	112.079		AT1G03210	5.48276
HORVU0Hr1G006190	195.736		AT1G03220	40.8492
HORVU0Hr1G006240	495.01		AT1G03230	14.3636
HORVU0Hr1G006250	19.0798		AT1G03250	6.88394
HORVU0Hr1G006350	31.0278		AT1G03260	2.05818
HORVU0Hr1G006380	9.32192		AT1G03270	12.0666
HORVU0Hr1G006420	13.333		AT1G03280	4.74508
HORVU0Hr1G006610	103.596		AT1G03330	98.4196
HORVU0Hr1G006630	6.53345		AT1G03340	2.12049
HORVU0Hr1G006640	7.92131		AT1G03350	13.9215
HORVU0Hr1G006670	8.42031		AT1G03360	6.31786
HORVU0Hr1G006680	2.86028		AT1G03365	3.27734
HORVU0Hr1G006760	5.0851		AT1G03380	10.402
HORVU0Hr1G006790	19.1068		AT1G03430	7.5825
HORVU0Hr1G006800	5.30429		AT1G03440	7.49327
HORVU0Hr1G006820	56.0538		AT1G03470	112.17
HORVU0Hr1G006940	2.37921		AT1G03475	16.3872
HORVU0Hr1G007050	4.55031		AT1G03510	2.20178
HORVU0Hr1G007080	31.1313		AT1G03530	4.54794
HORVU0Hr1G007150	24.5739		AT1G03550	2.57001
HORVU0Hr1G007230	1.98192		AT1G03590	3.07696
HORVU0Hr1G007310	4.34643		AT1G03600	51.8671
HORVU0Hr1G007340	4.61238		AT1G03610	19.2961
HORVU0Hr1G007380	12.091		AT1G03630	1.69422
HORVU0Hr1G007410	8.6439		AT1G03650	19.2471
HORVU0Hr1G007420	2.11744		AT1G03680	18.8549
HORVU0Hr1G007460	1.43049		AT1G03687	2.05902
HORVU0Hr1G007470	2.93707		AT1G03730	4.03481
HORVU0Hr1G007650	232.929		AT1G03750	1.6969
HORVU0Hr1G007700	9.46799		AT1G03760	30.7873
HORVU0Hr1G007800	6.93375		AT1G03770	26.8756
HORVU0Hr1G007860	15.3763		AT1G03790	131.327
HORVU0Hr1G007930	103.634		AT1G03830	1.23599
HORVU0Hr1G008030	2.47788		AT1G03860	16.5026
HORVU0Hr1G008060	19.2266		AT1G03880	3380.51
HORVU0Hr1G008080	10.3506		AT1G03890	60.106
HORVU0Hr1G008100	3.06497		AT1G03900	39.0821
HORVU0Hr1G008200	15.8324		AT1G03905	13.6665
HORVU0Hr1G008210	9.76566		AT1G03910	26.4038
HORVU0Hr1G008280	40.0485		AT1G03930	3.00102
HORVU0Hr1G008360	7.37918		AT1G03950	22.3889
HORVU0Hr1G008370	2.18874		AT1G03960	1.58019
HORVU0Hr1G008430	7.00656		AT1G03970	23.6403
HORVU0Hr1G008470	12.6464		AT1G03990	15.2922
HORVU0Hr1G008550	19.6166		AT1G04000	6.02388
HORVU0Hr1G008590	3.3378		AT1G04030	1.67721
HORVU0Hr1G008620	4.00748		AT1G04040	1.96361
HORVU0Hr1G008640	19.3326		AT1G04070	16.2838
HORVU0Hr1G008690	40.2755		AT1G04080	9.50466
HORVU0Hr1G008700	101.924		AT1G04100	1.95249
HORVU0Hr1G008740	76.1091		AT1G04105	1.65528
HORVU0Hr1G008770	4.94334		AT1G04120	6.53745
HORVU0Hr1G008780	21.4559		AT1G04130	6.17186
HORVU0Hr1G008790	12.1323		AT1G04140	9.1855
HORVU0Hr1G008800	35.9132		AT1G04170	30.3437
HORVU0Hr1G008810	99.4972		AT1G04190	15.4397
HORVU0Hr1G008850	8.7355		AT1G04200	1.86615
HORVU0Hr1G008860	16.6725		AT1G04210	3.94935
HORVU0Hr1G008870	47.2363		AT1G04230	9.54022
HORVU0Hr1G008880	34.7425		AT1G04260	15.0282
HORVU0Hr1G008890	53.4984		AT1G04270	180.727
HORVU0Hr1G008940	6.60239		AT1G04290	13.6441
HORVU0Hr1G008950	4.31426		AT1G04300	14.4821
HORVU0Hr1G008960	28.9103		AT1G04310	1.3917
HORVU0Hr1G008970	101.909		AT1G04340	6.27538
HORVU0Hr1G009030	98.1159		AT1G04350	3.88017
HORVU0Hr1G009040	352.899		AT1G04360	3.01425
HORVU0Hr1G009060	2.59458		AT1G04390	1.53114
HORVU0Hr1G009070	4.6069		AT1G04400	24.5029
HORVU0Hr1G009080	15.8504		AT1G04410	48.9506
HORVU0Hr1G009140	3.67789		AT1G04420	1.92878
HORVU0Hr1G009150	3.17878		AT1G04440	3.72862
HORVU0Hr1G009170	63.6399		AT1G04480	111.194
HORVU0Hr1G009290	7.76549		AT1G04510	16.1232
HORVU0Hr1G009380	7.19633		AT1G04530	42.8776
HORVU0Hr1G009550	8.95058		AT1G04550	3.84438
HORVU0Hr1G009560	8.13794		AT1G04555	8.88811
HORVU0Hr1G009580	5.39183		AT1G04560	9795.47
HORVU0Hr1G009640	5.87353		AT1G04590	23.6167
HORVU0Hr1G009680	10.0475		AT1G04620	4.2428
HORVU0Hr1G009740	9.58897		AT1G04630	14.4341
HORVU0Hr1G009910	13.2561		AT1G04635	11.2349
HORVU0Hr1G010000	18.5842		AT1G04640	11.1423
HORVU0Hr1G010060	3.95166		AT1G04660	5.05591
HORVU0Hr1G010230	18.9281		AT1G04690	35.4452
HORVU0Hr1G010260	24.5689		AT1G04710	4.82925
HORVU0Hr1G010280	3.30241		AT1G04750	49.9663
HORVU0Hr1G010360	1.78634		AT1G04770	2.71332
HORVU0Hr1G010490	3.94936		AT1G04780	3.00649
HORVU0Hr1G010530	5.70287		AT1G04790	5.41028
HORVU0Hr1G010590	11.3094		AT1G04810	8.79525
HORVU0Hr1G010630	24.8517		AT1G04820	2.84172
HORVU0Hr1G010660	7.3235		AT1G04830	26.73
HORVU0Hr1G010740	4.64431		AT1G04850	32.6019
HORVU0Hr1G010750	8.11512		AT1G04860	4.03219
HORVU0Hr1G010760	2.07164		AT1G04870	13.2846
HORVU0Hr1G010770	5.56884		AT1G04900	1.52279
HORVU0Hr1G010790	169.414		AT1G04910	8.89541
HORVU0Hr1G010800	21.2553		AT1G04920	5.61644
HORVU0Hr1G010840	4.04234		AT1G04930	1.13678
HORVU0Hr1G010870	22.6842		AT1G04940	7.84822
HORVU0Hr1G010890	31.4363		AT1G04945	4.58003
HORVU0Hr1G010960	22.0352		AT1G04950	8.22455
HORVU0Hr1G011150	3358.97		AT1G04960	9.87898
HORVU0Hr1G011270	50.5551		AT1G04970	8.92964
HORVU0Hr1G011310	33.4749		AT1G04985	28.7148
HORVU0Hr1G011430	3.44897		AT1G04990	2.0695
HORVU0Hr1G011460	23.6001		AT1G05010	2.05865
HORVU0Hr1G011470	2.38959		AT1G05030	2.43564
HORVU0Hr1G011510	83.9518		AT1G05055	5.50536
HORVU0Hr1G011520	52.4303		AT1G05060	44.0178
HORVU0Hr1G011550	230.296		AT1G05070	8.98082
HORVU0Hr1G011560	17.6627		AT1G05090	1.81966
HORVU0Hr1G011570	5.93515		AT1G05120	6.12013
HORVU0Hr1G011850	16.226		AT1G05140	4.89831
HORVU0Hr1G011860	6.87483		AT1G05150	11.8421
HORVU0Hr1G011940	222.779		AT1G05160	2.7372
HORVU0Hr1G012170	8.51738		AT1G05170	8.43427
HORVU0Hr1G012250	1.66884		AT1G05180	8.45317
HORVU0Hr1G012260	15.2562		AT1G05190	9.17038
HORVU0Hr1G012370	16.9637		AT1G05205	12.6201
HORVU0Hr1G012410	145.513		AT1G05230	1.28064
HORVU0Hr1G012460	44.6		AT1G05270	41.0957
HORVU0Hr1G012490	1.26508		AT1G05330	2.1819
HORVU0Hr1G012510	13.2225		AT1G05340	440.723
HORVU0Hr1G012520	15.033		AT1G05360	1.75069
HORVU0Hr1G012580	29.4852		AT1G05380	6.40011
HORVU0Hr1G012590	1.61782		AT1G05385	5.68894
HORVU0Hr1G012620	50.0602		AT1G05400	2.1246
HORVU0Hr1G012630	11.8977		AT1G05410	12.1667
HORVU0Hr1G012890	2.08468		AT1G05430	12.5777
HORVU0Hr1G012930	14.4513		AT1G05500	23.2814
HORVU0Hr1G012950	28.4859		AT1G05510	4240.25
HORVU0Hr1G012980	4.92152		AT1G05520	2.52422
HORVU0Hr1G013040	18.5304		AT1G05560	55.2027
HORVU0Hr1G013160	2.53473		AT1G05600	1.56569
HORVU0Hr1G013190	6.67227		AT1G05620	1.59906
HORVU0Hr1G013200	1.51711		AT1G05680	62.0513
HORVU0Hr1G013210	23.3264		AT1G05690	7.41735
HORVU0Hr1G013220	19.3024		AT1G05710	7.19042
HORVU0Hr1G013240	29.9507		AT1G05720	14.0997
HORVU0Hr1G013370	3.04		AT1G05730	20.5333
HORVU0Hr1G013400	77.204		AT1G05750	1.65564
HORVU0Hr1G013510	3.03518		AT1G05780	26.4726
HORVU0Hr1G013530	30.6009		AT1G05785	9.3984
HORVU0Hr1G013700	11.8585		AT1G05790	7.31573
HORVU0Hr1G013740	2.69428		AT1G05810	5.73256
HORVU0Hr1G013850	85.0839		AT1G05840	11.6772
HORVU0Hr1G013950	45.3302		AT1G05850	13.0235
HORVU0Hr1G014050	23.5224		AT1G05860	4.23834
HORVU0Hr1G014070	3.2236		AT1G05870	3.00327
HORVU0Hr1G014110	2.8424		AT1G05890	35.0941
HORVU0Hr1G014150	2.50174		AT1G05894	1.74889
HORVU0Hr1G014170	2.35737		AT1G05900	2.08782
HORVU0Hr1G014270	29.0147		AT1G05910	1.59003
HORVU0Hr1G014750	22.3325		AT1G05940	6.52881
HORVU0Hr1G014780	9.51131		AT1G05960	6.37635
HORVU0Hr1G014790	10.9215		AT1G05970	4.69701
HORVU0Hr1G014900	10.5389		AT1G06000	2.33519
HORVU0Hr1G015030	3.58727		AT1G06010	120.11
HORVU0Hr1G015180	8.33365		AT1G06040	3.13168
HORVU0Hr1G015250	67.3362		AT1G06045	2.30368
HORVU0Hr1G015260	30.0965		AT1G06060	8.84779
HORVU0Hr1G015380	7.65001		AT1G06070	6.19788
HORVU0Hr1G015390	1.86718		AT1G06110	121.583
HORVU0Hr1G015450	57.6419		AT1G06130	26.0096
HORVU0Hr1G015460	3.60625		AT1G06190	24.2834
HORVU0Hr1G015520	18.9188		AT1G06200	116.822
HORVU0Hr1G015530	11.7212		AT1G06210	46.3075
HORVU0Hr1G015560	2.39214		AT1G06220	11.0033
HORVU0Hr1G015600	4.09492		AT1G06230	11.9441
HORVU0Hr1G015700	3.47982		AT1G06270	2.2032
HORVU0Hr1G015750	92.833		AT1G06290	60.3102
HORVU0Hr1G015770	15.22		AT1G06380	4.9811
HORVU0Hr1G015780	1.55116		AT1G06390	7.21313
HORVU0Hr1G015810	3.53333		AT1G06400	255.934
HORVU0Hr1G015820	35.0001		AT1G06410	2.9533
HORVU0Hr1G015830	5.35348		AT1G06430	17.0427
HORVU0Hr1G015840	1.84153		AT1G06450	2.78351
HORVU0Hr1G015890	4.47174		AT1G06460	4.93313
HORVU0Hr1G015950	2.86832		AT1G06470	1.41245
HORVU0Hr1G015960	28.1207		AT1G06500	8.3614
HORVU0Hr1G016000	3.12121		AT1G06510	3.64117
HORVU0Hr1G016050	4.33133		AT1G06520	2.38071
HORVU0Hr1G016150	2.36515		AT1G06530	19.6607
HORVU0Hr1G016170	3.22799		AT1G06560	2.3411
HORVU0Hr1G016180	4.63339		AT1G06570	31.6224
HORVU0Hr1G016190	16.9623		AT1G06630	15.1134
HORVU0Hr1G016250	3.82939		AT1G06640	1.57031
HORVU0Hr1G016260	7.31904		AT1G06645	17.0197
HORVU0Hr1G016330	77.2801		AT1G06650	9.09896
HORVU0Hr1G016360	135.373		AT1G06670	1.70215
HORVU0Hr1G016430	8.57627		AT1G06680	12.6056
HORVU0Hr1G016450	9.69186		AT1G06690	6.48351
HORVU0Hr1G016630	76.0335		AT1G06700	22.3517
HORVU0Hr1G016640	28.9601		AT1G06720	4.16361
HORVU0Hr1G016650	3.25254		AT1G06730	2.88109
HORVU0Hr1G016720	8.65029		AT1G06760	28.6579
HORVU0Hr1G016780	4.95162		AT1G06770	2.45655
HORVU0Hr1G016820	8.59833		AT1G06790	6.89969
HORVU0Hr1G016880	12.1895		AT1G06800	2.34832
HORVU0Hr1G016920	4.78845		AT1G06820	2.29445
HORVU0Hr1G016930	6.73103		AT1G06890	24.8454
HORVU0Hr1G016960	59.8466		AT1G06900	2.76703
HORVU0Hr1G017020	132.544		AT1G06910	2.79375
HORVU0Hr1G017050	11.7303		AT1G06925	3.20478
HORVU0Hr1G017080	3.46731		AT1G06950	13.731
HORVU0Hr1G017090	7.28262		AT1G06960	6.14497
HORVU0Hr1G017100	5.54816		AT1G07020	7.79336
HORVU0Hr1G017120	33.3331		AT1G07030	20.7408
HORVU0Hr1G017140	2.27103		AT1G07040	17.4143
HORVU0Hr1G017170	11.6832		AT1G07070	6.51374
HORVU0Hr1G017210	113.746		AT1G07080	181.173
HORVU0Hr1G017250	21.8707		AT1G07090	1.73201
HORVU0Hr1G017260	18.1084		AT1G07110	10.4648
HORVU0Hr1G017320	6.25243		AT1G07120	1.99417
HORVU0Hr1G017330	9.27942		AT1G07130	10.3639
HORVU0Hr1G017360	2388.33		AT1G07140	51.271
HORVU0Hr1G017370	49.0883		AT1G07150	30.4877
HORVU0Hr1G017380	11.7864		AT1G07170	63.9944
HORVU0Hr1G017450	6.78205		AT1G07180	6.34683
HORVU0Hr1G017510	10.3892		AT1G07210	10.5524
HORVU0Hr1G017530	1.18729		AT1G07220	3.2216
HORVU0Hr1G017540	95.9307		AT1G07230	6.32104
HORVU0Hr1G017560	3.4427		AT1G07240	3.78956
HORVU0Hr1G017570	3.7114		AT1G07250	15.635
HORVU0Hr1G017620	23.4516		AT1G07300	2.3189
HORVU0Hr1G017640	18.3207		AT1G07310	25.4936
HORVU0Hr1G017680	10.523		AT1G07320	15.7542
HORVU0Hr1G017740	146.928		AT1G07350	33.6367
HORVU0Hr1G017760	140.533		AT1G07360	18.0316
HORVU0Hr1G017770	24.6366		AT1G07380	1.34342
HORVU0Hr1G017800	3.15077		AT1G07400	22.6336
HORVU0Hr1G017970	2.69398		AT1G07420	5.3222
HORVU0Hr1G018100	6.34246		AT1G07430	6.03613
HORVU0Hr1G018140	39.0675		AT1G07440	2.29075
HORVU0Hr1G018190	2.51622		AT1G07470	18.9915
HORVU0Hr1G018200	23.6533		AT1G07473	26.4255
HORVU0Hr1G018210	20.9441		AT1G07480	20.5646
HORVU0Hr1G018270	1.5333		AT1G07500	540.084
HORVU0Hr1G018300	145.481		AT1G07510	13.3558
HORVU0Hr1G018370	74.3421		AT1G07530	58.5371
HORVU0Hr1G018380	168.993		AT1G07570	6.51519
HORVU0Hr1G018510	302.655		AT1G07590	4.00008
HORVU0Hr1G018740	11.932		AT1G07615	7.28969
HORVU0Hr1G018830	21.1309		AT1G07645	2049.16
HORVU0Hr1G018890	4.36319		AT1G07660	46.8641
HORVU0Hr1G019370	3.91422		AT1G07670	3.4461
HORVU0Hr1G019390	5.24052		AT1G07700	8.19746
HORVU0Hr1G019600	2.59866		AT1G07725	7.09598
HORVU0Hr1G019610	4.5594		AT1G07730	3.0189
HORVU0Hr1G019670	62.1877		AT1G07740	2.24564
HORVU0Hr1G019750	6.97292		AT1G07745	6.4673
HORVU0Hr1G019770	7.04118		AT1G07750	6.10147
HORVU0Hr1G019780	1.19086		AT1G07770	86.0814
HORVU0Hr1G019790	10.3684		AT1G07780	2.80234
HORVU0Hr1G019880	65.8607		AT1G07790	13.6901
HORVU0Hr1G019890	30.3981		AT1G07810	1.79596
HORVU0Hr1G019900	8.0764		AT1G07820	49.6812
HORVU0Hr1G019910	183.631		AT1G07830	27.5512
HORVU0Hr1G019930	30.3981		AT1G07840	21.2158
HORVU0Hr1G019940	8.90129		AT1G07870	2.85845
HORVU0Hr1G019950	707.883		AT1G07890	6.14105
HORVU0Hr1G019960	65.8607		AT1G07902	3.50972
HORVU0Hr1G020010	12.5504		AT1G07910	4.2241
HORVU0Hr1G020040	4.17945		AT1G07920	74.8069
HORVU0Hr1G020110	88.8862		AT1G07930	48.1382
HORVU0Hr1G020130	2.22894		AT1G07940	57.2362
HORVU0Hr1G020140	3.6036		AT1G07950	19.0062
HORVU0Hr1G020180	8.38203		AT1G07960	23.8829
HORVU0Hr1G020200	7.74627		AT1G07970	3.93709
HORVU0Hr1G020210	2.15536		AT1G07980	30.6518
HORVU0Hr1G020260	14.9297		AT1G07985	3801.97
HORVU0Hr1G020420	9.32377		AT1G07990	8.6573
HORVU0Hr1G020490	4.76593		AT1G08000	2.67608
HORVU0Hr1G020730	24.8863		AT1G08010	3.16298
HORVU0Hr1G020790	22.115		AT1G08030	5.29385
HORVU0Hr1G020800	4.43851		AT1G08040	11.1112
HORVU0Hr1G020980	13.5338		AT1G08050	8.74389
HORVU0Hr1G021000	34.5236		AT1G08060	2.02674
HORVU0Hr1G021050	45.5314		AT1G08110	71.5494
HORVU0Hr1G021060	9.48203		AT1G08125	12.8849
HORVU0Hr1G021100	38.867		AT1G08130	2.64277
HORVU0Hr1G021200	37.2752		AT1G08170	251.029
HORVU0Hr1G021230	63.7448		AT1G08180	14.5393
HORVU0Hr1G021340	8.25675		AT1G08190	6.25423
HORVU0Hr1G021390	10.7272		AT1G08200	20.8571
HORVU0Hr1G021430	1.63502		AT1G08210	14.6395
HORVU0Hr1G021610	2.58856		AT1G08220	3.0772
HORVU0Hr1G021630	5.2005		AT1G08230	6.10903
HORVU0Hr1G021640	9.89808		AT1G08270	2.44147
HORVU0Hr1G021730	78.6153		AT1G08315	3.09201
HORVU0Hr1G021760	68.4451		AT1G08320	3.62148
HORVU0Hr1G021780	5.82962		AT1G08340	1.48879
HORVU0Hr1G021800	7.96978		AT1G08360	71.0685
HORVU0Hr1G021850	3.05117		AT1G08370	14.9922
HORVU0Hr1G021860	48.6705		AT1G08380	3.17068
HORVU0Hr1G021880	30.042		AT1G08390	4.55285
HORVU0Hr1G021900	44.6425		AT1G08410	18.9086
HORVU0Hr1G021930	13.3005		AT1G08420	7.69547
HORVU0Hr1G021940	21.3869		AT1G08450	4.64549
HORVU0Hr1G021950	15.5196		AT1G08460	20.605
HORVU0Hr1G021960	8.27662		AT1G08465	5.34147
HORVU0Hr1G021980	13.8536		AT1G08480	70.6497
HORVU0Hr1G022000	4.187		AT1G08490	10.8374
HORVU0Hr1G022050	12.9919		AT1G08510	5.42555
HORVU0Hr1G022060	4.49784		AT1G08520	2.84908
HORVU0Hr1G022160	5.78971		AT1G08530	3.72044
HORVU0Hr1G022240	4.15935		AT1G08550	10.3506
HORVU0Hr1G022270	9.85081		AT1G08570	463.922
HORVU0Hr1G022300	149.443		AT1G08580	47.2513
HORVU0Hr1G022310	10.7575		AT1G08600	2.71918
HORVU0Hr1G022440	8.09794		AT1G08610	2.38457
HORVU0Hr1G022470	11.7978		AT1G08620	1.67436
HORVU0Hr1G022480	6.37814		AT1G08630	2.7797
HORVU0Hr1G022500	107.76		AT1G08640	17.1728
HORVU0Hr1G022510	18.2634		AT1G08645	17.7885
HORVU0Hr1G022550	3.98265		AT1G08650	22.1414
HORVU0Hr1G022580	66.4476		AT1G08660	2.69868
HORVU0Hr1G022690	6.39379		AT1G08680	4.32072
HORVU0Hr1G022810	5.23071		AT1G08700	8.99617
HORVU0Hr1G023140	6.21998		AT1G08710	8.79073
HORVU0Hr1G023180	27.2829		AT1G08720	2.2723
HORVU0Hr1G023280	23.3785		AT1G08750	3.65166
HORVU0Hr1G023290	597.343		AT1G08760	3.50653
HORVU0Hr1G023300	4.1748		AT1G08770	6.8341
HORVU0Hr1G023370	3.75397		AT1G08780	37.6036
HORVU0Hr1G023390	6.78371		AT1G08820	6.96669
HORVU0Hr1G023430	1.46298		AT1G08830	74.2837
HORVU0Hr1G023460	52.9395		AT1G08845	8.60087
HORVU0Hr1G023510	15.6231		AT1G08880	43.7231
HORVU0Hr1G023640	6.09825		AT1G08910	8.06811
HORVU0Hr1G023760	9.57404		AT1G08970	29.7279
HORVU0Hr1G023870	428.777		AT1G09010	8.28495
HORVU0Hr1G023980	275.164		AT1G09020	3.28242
HORVU0Hr1G024130	14.2733		AT1G09060	2.88744
HORVU0Hr1G024490	4.36168		AT1G09070	121.768
HORVU0Hr1G024940	171.439		AT1G09100	24.584
HORVU0Hr1G025440	46.977		AT1G09130	31.8794
HORVU0Hr1G025640	4.00208		AT1G09140	61.2744
HORVU0Hr1G025730	4.82813		AT1G09150	15.765
HORVU0Hr1G025820	33.9847		AT1G09200	6.30837
HORVU0Hr1G025860	1.99855		AT1G09210	1.85122
HORVU0Hr1G025870	15.7573		AT1G09230	4.41647
HORVU0Hr1G025890	1.62515		AT1G09250	16.1144
HORVU0Hr1G025900	3.69769		AT1G09270	16.2225
HORVU0Hr1G025910	9.51131		AT1G09280	10.8394
HORVU0Hr1G025920	4.19589		AT1G09290	30.4093
HORVU0Hr1G026010	1.89603		AT1G09300	6.04204
HORVU0Hr1G026370	19.4201		AT1G09310	7.98859
HORVU0Hr1G026500	243.726		AT1G09320	4.41811
HORVU0Hr1G026570	40.4651		AT1G09330	16.0769
HORVU0Hr1G026700	13.0684		AT1G09340	1.4918
HORVU0Hr1G027010	11.6448		AT1G09415	2.89163
HORVU0Hr1G027060	24.8306		AT1G09420	5.28968
HORVU0Hr1G027080	1.45951		AT1G09430	38.259
HORVU0Hr1G027130	1794.17		AT1G09490	5.41279
HORVU0Hr1G027160	4.22286		AT1G09500	31.5058
HORVU0Hr1G027230	4.22286		AT1G09520	20.1821
HORVU0Hr1G027290	26.3001		AT1G09530	2.49793
HORVU0Hr1G027480	61.7305		AT1G09560	15.8115
HORVU0Hr1G027490	9.51131		AT1G09570	15.8334
HORVU0Hr1G027670	1.89739		AT1G09580	1.27395
HORVU0Hr1G027960	4.47677		AT1G09590	51.2411
HORVU0Hr1G027970	6.14288		AT1G09620	11.3098
HORVU0Hr1G028010	26.6451		AT1G09630	1.08822
HORVU0Hr1G028120	4.16005		AT1G09640	39.083
HORVU0Hr1G028130	5.71928		AT1G09645	54.2651
HORVU0Hr1G028170	14.4797		AT1G09660	1.53289
HORVU0Hr1G028230	5.87803		AT1G09665	2.06699
HORVU0Hr1G028270	16.2048		AT1G09680	1.37681
HORVU0Hr1G028320	9.51131		AT1G09690	127.395
HORVU0Hr1G028350	30.0461		AT1G09700	1.90247
HORVU0Hr1G028370	1.85572		AT1G09710	1.88269
HORVU0Hr1G028670	3.01261		AT1G09730	4.57613
HORVU0Hr1G028690	4.1646		AT1G09740	15.5876
HORVU0Hr1G028710	2.10934		AT1G09760	29.5282
HORVU0Hr1G028730	2.92029		AT1G09770	19.1235
HORVU0Hr1G028930	4.29394		AT1G09794	26.7231
HORVU0Hr1G028990	14.3897		AT1G09795	28.6269
HORVU0Hr1G029020	6.30697		AT1G09800	2.30082
HORVU0Hr1G029050	3.72984		AT1G09810	9.15282
HORVU0Hr1G029090	47.0401		AT1G09815	46.2834
HORVU0Hr1G029130	12.4771		AT1G09830	2.35598
HORVU0Hr1G029140	9.6417		AT1G09840	3.20635
HORVU0Hr1G029170	9.87201		AT1G09870	7.1756
HORVU0Hr1G029210	7.79809		AT1G09900	2.26206
HORVU0Hr1G029270	78.4982		AT1G09910	8.65232
HORVU0Hr1G029310	34.5196		AT1G09920	38.3848
HORVU0Hr1G029350	8.67745		AT1G09940	10.8892
HORVU0Hr1G029360	9910.12		AT1G09950	1.86488
HORVU0Hr1G029410	19.7503		AT1G09960	1.18854
HORVU0Hr1G029500	2.35075		AT1G09970	41.0881
HORVU0Hr1G029550	14.7803		AT1G09980	2.14848
HORVU0Hr1G029570	3.15783		AT1G10030	6.79455
HORVU0Hr1G029590	3.01261		AT1G10070	13.6684
HORVU0Hr1G029600	19.0112		AT1G10090	1.45448
HORVU0Hr1G029970	2.4		AT1G10095	2.91045
HORVU0Hr1G030010	1.71387		AT1G10120	1.65579
HORVU0Hr1G030120	61.1388		AT1G10140	4.69616
HORVU0Hr1G030190	24.3479		AT1G10170	14.842
HORVU0Hr1G030200	8.03497		AT1G10180	1.70511
HORVU0Hr1G030440	64.6691		AT1G10230	6.17153
HORVU0Hr1G030450	38.5827		AT1G10240	1.39881
HORVU0Hr1G030460	15.6701		AT1G10270	2.09251
HORVU0Hr1G030640	6.32332		AT1G10290	2.51723
HORVU0Hr1G030660	61.7305		AT1G10310	50.5699
HORVU0Hr1G030920	9.6999		AT1G10320	1.52078
HORVU0Hr1G030990	30.8076		AT1G10370	3.98283
HORVU0Hr1G031390	12.9797		AT1G10390	7.90105
HORVU0Hr1G031550	1.86284		AT1G10395	4.575
HORVU0Hr1G031610	2.39306		AT1G10410	4.8525
HORVU0Hr1G031690	8.69906		AT1G10430	7.18466
HORVU0Hr1G031730	2.10934		AT1G10450	2.05359
HORVU0Hr1G031810	2.1419		AT1G10490	3.08678
HORVU0Hr1G031850	5.11617		AT1G10500	103.586
HORVU0Hr1G031960	40.1506		AT1G10510	5.4305
HORVU0Hr1G031970	9.00416		AT1G10520	1.70609
HORVU0Hr1G031980	4.02499		AT1G10522	7.77028
HORVU0Hr1G032110	16.4949		AT1G10570	2.59081
HORVU0Hr1G032120	33.1073		AT1G10580	12.3544
HORVU0Hr1G032240	2.00542		AT1G10590	116.81
HORVU0Hr1G032260	25.0307		AT1G10600	15.857
HORVU0Hr1G032280	4.24578		AT1G10610	4.06308
HORVU0Hr1G032330	92.1226		AT1G10630	2.22414
HORVU0Hr1G032360	6.0282		AT1G10650	2.37475
HORVU0Hr1G032390	28.9368		AT1G10660	21.333
HORVU0Hr1G032460	3.67658		AT1G10670	2.03143
HORVU0Hr1G033200	6.32027		AT1G10690	2.85233
HORVU0Hr1G033260	2.33866		AT1G10700	2.19464
HORVU0Hr1G033370	7.05805		AT1G10720	1.23955
HORVU0Hr1G033380	132.353		AT1G10730	2.09459
HORVU0Hr1G033630	17.9052		AT1G10770	15.6703
HORVU0Hr1G033640	15.0045		AT1G10820	1.5451
HORVU0Hr1G033670	23.2146		AT1G10830	10.0047
HORVU0Hr1G034140	9.05401		AT1G10840	56.725
HORVU0Hr1G034150	110.227		AT1G10865	101.16
HORVU0Hr1G034160	161.728		AT1G10870	4.4039
HORVU0Hr1G034170	92.9737		AT1G10890	9.75532
HORVU0Hr1G034800	89.4716		AT1G10900	2.71892
HORVU0Hr1G035360	76.0367		AT1G10910	5.4355
HORVU0Hr1G035530	2.28748		AT1G10940	14.2443
HORVU0Hr1G035550	43.9133		AT1G10950	7.59237
HORVU0Hr1G035560	5.05665		AT1G10960	8.49917
HORVU0Hr1G035910	20.62		AT1G10970	3.91883
HORVU0Hr1G035920	17.6447		AT1G11020	24.9856
HORVU0Hr1G035930	9.6417		AT1G11050	2.54196
HORVU0Hr1G036440	6.58164		AT1G11060	2.87348
HORVU0Hr1G036550	52.6792		AT1G11170	9.23415
HORVU0Hr1G036660	37.0675		AT1G11180	10.8871
HORVU0Hr1G037050	8.95934		AT1G11200	3.17201
HORVU0Hr1G037060	210.78		AT1G11240	55.2168
HORVU0Hr1G037070	1.66645		AT1G11260	12.1084
HORVU0Hr1G037100	17.9052		AT1G11270	1.46614
HORVU0Hr1G037110	15.0045		AT1G11300	2.47394
HORVU0Hr1G037120	129.502		AT1G11310	4.09855
HORVU0Hr1G037200	5.56477		AT1G11320	1.73232
HORVU0Hr1G037210	4.82262		AT1G11350	1.22034
HORVU0Hr1G037370	1.85572		AT1G11360	28.678
HORVU0Hr1G037670	36.3781		AT1G11370	1.64852
HORVU0Hr1G037680	64.1269		AT1G11380	2.40323
HORVU0Hr1G037700	827.419		AT1G11390	2.47284
HORVU0Hr1G038040	108.687		AT1G11400	57.3367
HORVU0Hr1G038120	16.2511		AT1G11430	39.1705
HORVU0Hr1G038290	3.96776		AT1G11475	373.016
HORVU0Hr1G038350	10.7395		AT1G11480	23.6074
HORVU0Hr1G038420	4.49103		AT1G11530	179.705
HORVU0Hr1G038470	2.61166		AT1G11591	2.80945
HORVU0Hr1G038500	69.9042		AT1G11630	1.41216
HORVU0Hr1G038620	13.8815		AT1G11650	73.1883
HORVU0Hr1G038680	35.5367		AT1G11660	1.33672
HORVU0Hr1G038750	35.8366		AT1G11680	3.84171
HORVU0Hr1G038790	9.20847		AT1G11700	4.56681
HORVU0Hr1G038810	32.1997		AT1G11720	2.62765
HORVU0Hr1G038820	1.3246		AT1G11750	34.4827
HORVU0Hr1G038830	2.64095		AT1G11755	4.37549
HORVU0Hr1G038850	4.15632		AT1G11760	8.12714
HORVU0Hr1G038890	56.6288		AT1G11765	9.91299
HORVU0Hr1G038920	13.6699		AT1G11780	5.14854
HORVU0Hr1G039040	4.42833		AT1G11800	3.55017
HORVU0Hr1G039050	11.5123		AT1G11820	2.8953
HORVU0Hr1G039130	18.4345		AT1G11840	181.491
HORVU0Hr1G039200	6.21648		AT1G11860	46.3539
HORVU0Hr1G039250	22.4069		AT1G11870	2.36129
HORVU0Hr1G039260	6.74093		AT1G11890	5.7897
HORVU0Hr1G039270	14.4832		AT1G11900	1.40542
HORVU0Hr1G039330	10.5099		AT1G11905	2.16895
HORVU0Hr1G039400	2.47701		AT1G11910	314.574
HORVU0Hr1G039450	12.3425		AT1G11930	46.0781
HORVU0Hr1G039460	14.2595		AT1G11950	3.44384
HORVU0Hr1G039470	35.4755		AT1G12020	7.58053
HORVU0Hr1G039520	10.2336		AT1G12050	4.56057
HORVU0Hr1G039560	8.42203		AT1G12060	21.5046
HORVU0Hr1G039590	1.86143		AT1G12064	105.574
HORVU0Hr1G039600	3.84819		AT1G12090	8.41276
HORVU0Hr1G039620	3.29389		AT1G12110	1.50319
HORVU0Hr1G039640	6.66461		AT1G12120	3.14721
HORVU0Hr1G039670	1.78524		AT1G12130	26.9455
HORVU0Hr1G039780	3.04303		AT1G12140	4.62197
HORVU0Hr1G039920	109.372		AT1G12230	1.53119
HORVU0Hr1G039960	11.3543		AT1G12244	2.1076
HORVU0Hr1G039990	2.79791		AT1G12250	2.49566
HORVU0Hr1G040000	11.427		AT1G12270	5.88359
HORVU0Hr1G040300	3.08051		AT1G12310	30.4306
HORVU0Hr1G040310	9.50034		AT1G12320	18.5231
HORVU0Hr1G040320	92.1274		AT1G12330	25.7862
HORVU0Hr1G040330	23.0674		AT1G12350	18.0489
HORVU0Hr1G040340	218.25		AT1G12360	8.28716
HORVU0Hr1G040350	11.423		AT1G12370	1.21077
HORVU0Hr1G040430	4.46371		AT1G12390	15.5326
HORVU0Hr1G040440	26.5507		AT1G12400	7.88585
HORVU0Hr1G040530	2.84524		AT1G12410	100.518
HORVU1Hr1G000010	16.9154		AT1G12440	265.105
HORVU1Hr1G000020	101.859		AT1G12470	3.76485
HORVU1Hr1G000030	8.3866		AT1G12520	32.5377
HORVU1Hr1G000040	7.25275		AT1G12530	6.03931
HORVU1Hr1G000060	9.05061		AT1G12580	3.97978
HORVU1Hr1G000080	203.033		AT1G12640	5.57472
HORVU1Hr1G000090	2.26559		AT1G12650	25.0565
HORVU1Hr1G000110	6.53174		AT1G12680	7.54293
HORVU1Hr1G000140	5.06246		AT1G12710	20.6562
HORVU1Hr1G000270	10.4825		AT1G12750	3.63533
HORVU1Hr1G000290	29.7515		AT1G12760	22.2338
HORVU1Hr1G000310	151.111		AT1G12770	9.65456
HORVU1Hr1G000380	21.2086		AT1G12780	41.2535
HORVU1Hr1G000440	13.7763		AT1G12790	2.90036
HORVU1Hr1G000450	28.0464		AT1G12800	1.56249
HORVU1Hr1G000470	5.11173		AT1G12805	8.67616
HORVU1Hr1G000520	7.55567		AT1G12810	38.3042
HORVU1Hr1G000530	61.9941		AT1G12820	2.63957
HORVU1Hr1G000600	27.3184		AT1G12830	23.0556
HORVU1Hr1G000620	18.0819		AT1G12840	33.3384
HORVU1Hr1G000710	69.2776		AT1G12850	2.89962
HORVU1Hr1G000940	32.6317		AT1G12860	2.68102
HORVU1Hr1G000960	89.6693		AT1G12900	1.92312
HORVU1Hr1G001020	3.27067		AT1G12910	11.9607
HORVU1Hr1G001090	2.67262		AT1G12920	28.66
HORVU1Hr1G001270	70.4832		AT1G12930	1.48872
HORVU1Hr1G001540	2.08098		AT1G12940	3.51633
HORVU1Hr1G001750	22.4488		AT1G12970	14.2341
HORVU1Hr1G001760	22.6819		AT1G13000	1.37316
HORVU1Hr1G001800	78.2291		AT1G13020	2.62044
HORVU1Hr1G001810	1.99571		AT1G13030	1.32662
HORVU1Hr1G001850	2.10054		AT1G13060	58.6907
HORVU1Hr1G001890	57.4428		AT1G13090	31.857
HORVU1Hr1G001910	33.8517		AT1G13120	4.24221
HORVU1Hr1G001920	26.2756		AT1G13160	3.83187
HORVU1Hr1G002100	12.3281		AT1G13180	1.60915
HORVU1Hr1G002120	9.53225		AT1G13190	14.7628
HORVU1Hr1G002150	9.35534		AT1G13195	15.2313
HORVU1Hr1G002170	150.284		AT1G13220	1.12055
HORVU1Hr1G002240	15.4862		AT1G13270	2.59294
HORVU1Hr1G002260	45.2289		AT1G13280	2.94152
HORVU1Hr1G002280	8.33849		AT1G13320	7.98217
HORVU1Hr1G002300	39.7357		AT1G13340	42.0538
HORVU1Hr1G002310	21.9769		AT1G13350	3.16953
HORVU1Hr1G002340	8.88848		AT1G13360	208.105
HORVU1Hr1G002390	10.8208		AT1G13380	1.53847
HORVU1Hr1G002490	1.7367		AT1G13390	38.5804
HORVU1Hr1G002500	65.861		AT1G13410	1.65205
HORVU1Hr1G002510	31.4732		AT1G13440	111.447
HORVU1Hr1G002550	106.938		AT1G13450	37.3955
HORVU1Hr1G002740	3.04771		AT1G13460	14.7499
HORVU1Hr1G002830	12.886		AT1G13560	14.3342
HORVU1Hr1G002840	226.707		AT1G13570	3.95667
HORVU1Hr1G002960	1.86815		AT1G13590	77.4932
HORVU1Hr1G003050	1.85909		AT1G13640	52.2673
HORVU1Hr1G003150	2.11723		AT1G13690	31.5216
HORVU1Hr1G003170	7.64011		AT1G13730	2.87153
HORVU1Hr1G003270	3.37206		AT1G13740	14.8112
HORVU1Hr1G003300	6.44916		AT1G13770	3.94047
HORVU1Hr1G003460	34.945		AT1G13780	8.17441
HORVU1Hr1G003530	11.5176		AT1G13810	5.72098
HORVU1Hr1G003540	3.86791		AT1G13820	30.7834
HORVU1Hr1G003590	110.091		AT1G13870	11.3033
HORVU1Hr1G003600	18.0065		AT1G13880	8.04162
HORVU1Hr1G003740	12.2258		AT1G13900	1.82357
HORVU1Hr1G003750	7.20844		AT1G13930	16.8371
HORVU1Hr1G003940	1.51766		AT1G13960	31.8723
HORVU1Hr1G003960	6.96262		AT1G13990	114.141
HORVU1Hr1G004080	1.21514		AT1G14000	10.9249
HORVU1Hr1G004150	133.107		AT1G14010	3.33388
HORVU1Hr1G004160	4.69186		AT1G14020	1.23631
HORVU1Hr1G004200	34.9433		AT1G14060	35.0285
HORVU1Hr1G004230	15.8564		AT1G14130	8.33897
HORVU1Hr1G004430	5.13652		AT1G14140	2.17112
HORVU1Hr1G004480	9.63631		AT1G14170	17.045
HORVU1Hr1G004490	14.243		AT1G14200	173.064
HORVU1Hr1G004510	19.498		AT1G14205	5.21114
HORVU1Hr1G004550	6.42272		AT1G14210	2.8324
HORVU1Hr1G004590	5.99959		AT1G14230	8.03987
HORVU1Hr1G004610	6.26489		AT1G14270	2.75847
HORVU1Hr1G004630	2.17758		AT1G14300	17.3391
HORVU1Hr1G004680	2.53142		AT1G14310	1.88252
HORVU1Hr1G004910	2.51725		AT1G14320	239.987
HORVU1Hr1G004960	23.0343		AT1G14340	3.01721
HORVU1Hr1G004970	161.821		AT1G14360	1.54628
HORVU1Hr1G005100	13.0984		AT1G14380	1.55869
HORVU1Hr1G005110	11.8107		AT1G14400	119.043
HORVU1Hr1G005140	3.73289		AT1G14410	9.18743
HORVU1Hr1G005260	38.7793		AT1G14450	36.5092
HORVU1Hr1G005280	3.71687		AT1G14453	57.8288
HORVU1Hr1G005320	55.7608		AT1G14510	42.5766
HORVU1Hr1G005370	22.3248		AT1G14520	48.442
HORVU1Hr1G005450	45.273		AT1G14530	44.9765
HORVU1Hr1G005600	48.4706		AT1G14560	2.48512
HORVU1Hr1G005680	2.40247		AT1G14570	44.7746
HORVU1Hr1G005710	1.6227		AT1G14580	3.81879
HORVU1Hr1G005790	66.7336		AT1G14590	4.42319
HORVU1Hr1G005800	3.13788		AT1G14610	4.3247
HORVU1Hr1G005870	3.69365		AT1G14620	14.1465
HORVU1Hr1G005900	3.09551		AT1G14650	4.36553
HORVU1Hr1G005920	13.419		AT1G14660	2.7917
HORVU1Hr1G005980	18.4909		AT1G14670	2.73132
HORVU1Hr1G006020	1.19182		AT1G14685	7.41268
HORVU1Hr1G006770	12.3125		AT1G14710	1.6107
HORVU1Hr1G006860	98.6403		AT1G14720	17.1996
HORVU1Hr1G006880	6.79901		AT1G14740	32.5602
HORVU1Hr1G006890	23.7958		AT1G14760	5.41483
HORVU1Hr1G006950	85.2252		AT1G14770	2.03062
HORVU1Hr1G007010	3.28297		AT1G14810	12.2755
HORVU1Hr1G007310	7.53981		AT1G14830	6.96685
HORVU1Hr1G007580	27.8239		AT1G14850	4.70871
HORVU1Hr1G007600	33.3442		AT1G14860	1.5698
HORVU1Hr1G007640	7.71312		AT1G14870	5.33594
HORVU1Hr1G007730	2.99826		AT1G14890	2.52483
HORVU1Hr1G008010	3.06148		AT1G14900	2.75358
HORVU1Hr1G008090	1.42778		AT1G14910	3.34249
HORVU1Hr1G008100	6.57267		AT1G14920	4.18211
HORVU1Hr1G008120	482.933		AT1G14930	723.025
HORVU1Hr1G008130	50.2344		AT1G14940	1096.91
HORVU1Hr1G008230	3.14286		AT1G14950	5120.12
HORVU1Hr1G008250	15.8731		AT1G14960	20.6943
HORVU1Hr1G008300	2.10529		AT1G14980	373.124
HORVU1Hr1G008330	29.0299		AT1G14990	8.86859
HORVU1Hr1G008350	37.2445		AT1G15010	11.3708
HORVU1Hr1G008530	25.0769		AT1G15020	5.81431
HORVU1Hr1G008540	38.9175		AT1G15030	11.7687
HORVU1Hr1G008620	53.8361		AT1G15050	2.18926
HORVU1Hr1G008690	2.17843		AT1G15060	9.04783
HORVU1Hr1G009030	14.4992		AT1G15100	50.4847
HORVU1Hr1G009100	4.7779		AT1G15110	15.6332
HORVU1Hr1G009140	160.563		AT1G15120	65.3994
HORVU1Hr1G009160	50.2286		AT1G15125	2.56809
HORVU1Hr1G009390	2.12461		AT1G15130	14.2926
HORVU1Hr1G009430	22.2986		AT1G15140	6.81621
HORVU1Hr1G009900	12.0168		AT1G15165	1.33452
HORVU1Hr1G009950	143.244		AT1G15170	4.96127
HORVU1Hr1G009980	219.07		AT1G15180	49.7927
HORVU1Hr1G010040	5.94631		AT1G15190	3.1387
HORVU1Hr1G010130	9.65096		AT1G15200	11.1499
HORVU1Hr1G010190	9.85942		AT1G15220	8.9224
HORVU1Hr1G010220	3.20008		AT1G15230	276.732
HORVU1Hr1G010250	25.2009		AT1G15240	5.16466
HORVU1Hr1G010380	11.8009		AT1G15250	32.0407
HORVU1Hr1G010440	256.559		AT1G15270	71.7265
HORVU1Hr1G010490	1.73693		AT1G15280	14.5696
HORVU1Hr1G010510	20.9854		AT1G15310	2.16251
HORVU1Hr1G010670	47.5644		AT1G15330	110.297
HORVU1Hr1G010750	55.9121		AT1G15340	42.5865
HORVU1Hr1G010800	11.4		AT1G15350	45.4623
HORVU1Hr1G010810	2.73855		AT1G15370	18.6745
HORVU1Hr1G010820	11.1295		AT1G15380	2.42254
HORVU1Hr1G010850	31.9868		AT1G15390	14.7106
HORVU1Hr1G010930	4.61766		AT1G15400	79.0785
HORVU1Hr1G010940	22.5444		AT1G15415	7.27253
HORVU1Hr1G010950	18.6233		AT1G15420	28.4362
HORVU1Hr1G011030	2.4002		AT1G15430	68.384
HORVU1Hr1G011350	2.64163		AT1G15440	7.09156
HORVU1Hr1G011370	63.5688		AT1G15470	1.95889
HORVU1Hr1G011400	2.45357		AT1G15480	3.75527
HORVU1Hr1G011520	4.82406		AT1G15500	23.4396
HORVU1Hr1G011600	6.37833		AT1G15510	2.26039
HORVU1Hr1G011780	7.90625		AT1G15530	2.67152
HORVU1Hr1G011800	6.23603		AT1G15670	9.98684
HORVU1Hr1G011900	6.13724		AT1G15690	76.8253
HORVU1Hr1G011930	15.2247		AT1G15700	6.28539
HORVU1Hr1G011990	151.566		AT1G15710	2.29844
HORVU1Hr1G012000	3.07315		AT1G15720	2.44742
HORVU1Hr1G012060	25.4273		AT1G15730	2.60519
HORVU1Hr1G012080	120.372		AT1G15740	43.363
HORVU1Hr1G012140	4.97914		AT1G15750	9.49491
HORVU1Hr1G012180	4.34854		AT1G15780	2.54076
HORVU1Hr1G012190	1.36909		AT1G15790	1.4532
HORVU1Hr1G012270	4.33008		AT1G15800	4.80624
HORVU1Hr1G012280	7.76084		AT1G15810	3.27619
HORVU1Hr1G012420	9.08531		AT1G15820	2.87083
HORVU1Hr1G012430	2.02069		AT1G15840	23.1282
HORVU1Hr1G012440	3.54702		AT1G15860	20.0952
HORVU1Hr1G012460	4.39518		AT1G15870	4.11542
HORVU1Hr1G012470	199.708		AT1G15880	19.0702
HORVU1Hr1G012600	2.99892		AT1G15885	18.1085
HORVU1Hr1G012680	7.55634		AT1G15920	15.3427
HORVU1Hr1G012690	23.0919		AT1G15930	49.8381
HORVU1Hr1G012710	106.206		AT1G15940	7.98265
HORVU1Hr1G012730	49.6745		AT1G15950	23.4253
HORVU1Hr1G013040	9.98044		AT1G15960	5.51083
HORVU1Hr1G013160	36.6825		AT1G16000	140.636
HORVU1Hr1G013190	3.94314		AT1G16010	9.9479
HORVU1Hr1G013210	8.45234		AT1G16030	233.246
HORVU1Hr1G013310	6.91394		AT1G16040	32.0859
HORVU1Hr1G013450	1.69535		AT1G16080	6.9663
HORVU1Hr1G013480	2.10587		AT1G16090	1.71947
HORVU1Hr1G013490	4.98013		AT1G16170	3.57924
HORVU1Hr1G013580	2.48367		AT1G16180	40.7371
HORVU1Hr1G013600	20.847		AT1G16190	7.35798
HORVU1Hr1G013640	7.08505		AT1G16210	88.7222
HORVU1Hr1G013730	8.16788		AT1G16240	157.648
HORVU1Hr1G013780	372.64		AT1G16250	2.82967
HORVU1Hr1G013820	227.028		AT1G16270	6.52736
HORVU1Hr1G013830	8.599		AT1G16280	7.02905
HORVU1Hr1G013900	2.02425		AT1G16300	9.48509
HORVU1Hr1G013970	1.91819		AT1G16320	15.4623
HORVU1Hr1G014010	24.5177		AT1G16340	1.62053
HORVU1Hr1G014080	44.5831		AT1G16350	14.2018
HORVU1Hr1G014120	18.6446		AT1G16430	13.478
HORVU1Hr1G014380	54.424		AT1G16460	16.2661
HORVU1Hr1G014570	2.88432		AT1G16470	100.556
HORVU1Hr1G014580	5.49593		AT1G16510	85.8052
HORVU1Hr1G014610	30.0764		AT1G16515	16.1786
HORVU1Hr1G014730	2.48744		AT1G16540	6.32118
HORVU1Hr1G014800	56.75		AT1G16560	7.0371
HORVU1Hr1G014820	3.8261		AT1G16570	1.82259
HORVU1Hr1G014850	8.32798		AT1G16590	5.03927
HORVU1Hr1G015040	61.7047		AT1G16610	14.2341
HORVU1Hr1G015060	55.5458		AT1G16650	7.27869
HORVU1Hr1G015130	2.23574		AT1G16670	4.20182
HORVU1Hr1G015240	2.55357		AT1G16680	6.20384
HORVU1Hr1G015270	14.6832		AT1G16700	43.6192
HORVU1Hr1G015310	6.36472		AT1G16710	1.64194
HORVU1Hr1G015490	13.5877		AT1G16720	3.24109
HORVU1Hr1G015500	45.9025		AT1G16730	717.06
HORVU1Hr1G015560	33.0354		AT1G16740	65.0331
HORVU1Hr1G015590	148.162		AT1G16770	148.209
HORVU1Hr1G015720	1.42572		AT1G16790	31.2042
HORVU1Hr1G015790	2.05439		AT1G16810	118.783
HORVU1Hr1G015820	10.1148		AT1G16820	2.6013
HORVU1Hr1G015940	2.34673		AT1G16825	2.97357
HORVU1Hr1G016110	7.22239		AT1G16840	98.334
HORVU1Hr1G016130	63.0971		AT1G16850	252.431
HORVU1Hr1G016170	30.7727		AT1G16860	6.221
HORVU1Hr1G016200	4.25491		AT1G16870	4.72454
HORVU1Hr1G016240	20.7154		AT1G16890	78.1005
HORVU1Hr1G016280	2.01279		AT1G16900	1.45771
HORVU1Hr1G016330	20.4669		AT1G16916	17.4466
HORVU1Hr1G016360	1.77086		AT1G16920	5.05165
HORVU1Hr1G016370	10.2298		AT1G16930	4.22364
HORVU1Hr1G016430	2.6889		AT1G16970	2.96247
HORVU1Hr1G016480	15.3671		AT1G17010	242.471
HORVU1Hr1G016490	47.151		AT1G17020	48.8053
HORVU1Hr1G016630	36.2201		AT1G17040	1.80825
HORVU1Hr1G016640	34.5292		AT1G17050	4.18323
HORVU1Hr1G016700	3.28468		AT1G17060	4.9588
HORVU1Hr1G016710	2.23896		AT1G17065	2.88262
HORVU1Hr1G016790	6.09871		AT1G17080	290.047
HORVU1Hr1G017050	163.438		AT1G17090	117.503
HORVU1Hr1G017120	24.4788		AT1G17100	104.308
HORVU1Hr1G017210	5.57231		AT1G17110	5.58898
HORVU1Hr1G017220	6.32943		AT1G17130	31.157
HORVU1Hr1G017230	11.6326		AT1G17145	79.2326
HORVU1Hr1G017240	1.48762		AT1G17147	16.4767
HORVU1Hr1G017380	18.9383		AT1G17160	6.78024
HORVU1Hr1G017460	23.4391		AT1G17170	9.11828
HORVU1Hr1G017480	67.1569		AT1G17190	4.42844
HORVU1Hr1G017570	101.088		AT1G17200	3.50111
HORVU1Hr1G017640	2.42345		AT1G17210	9.3706
HORVU1Hr1G017670	3.52769		AT1G17220	2.32042
HORVU1Hr1G017700	470.026		AT1G17270	1.16465
HORVU1Hr1G017710	130.036		AT1G17280	23.8194
HORVU1Hr1G017720	8.24772		AT1G17290	20.1874
HORVU1Hr1G017740	2.69925		AT1G17330	6.75729
HORVU1Hr1G017900	4.59664		AT1G17350	6.61665
HORVU1Hr1G018060	144.87		AT1G17370	32.2623
HORVU1Hr1G018080	9.85775		AT1G17410	13.3248
HORVU1Hr1G018140	1338.98		AT1G17430	10.1658
HORVU1Hr1G018150	61.3847		AT1G17440	3.91963
HORVU1Hr1G018260	1.89799		AT1G17450	2.26753
HORVU1Hr1G018310	16.2172		AT1G17455	6.61996
HORVU1Hr1G018380	2.1082		AT1G17460	1.52999
HORVU1Hr1G018540	53.7735		AT1G17470	23.2881
HORVU1Hr1G018600	4.86027		AT1G17490	37.1712
HORVU1Hr1G018700	6.70605		AT1G17510	72.6105
HORVU1Hr1G018720	13.9653		AT1G17520	40.2898
HORVU1Hr1G018740	39.045		AT1G17530	249.831
HORVU1Hr1G018750	254.137		AT1G17550	9.16071
HORVU1Hr1G018760	4.34291		AT1G17580	4.43393
HORVU1Hr1G018780	14.2559		AT1G17590	1.43127
HORVU1Hr1G018790	29.7573		AT1G17620	10.2089
HORVU1Hr1G018910	5.43602		AT1G17640	22.3148
HORVU1Hr1G018930	1.34693		AT1G17650	2.68832
HORVU1Hr1G019070	36.2119		AT1G17665	9.73262
HORVU1Hr1G019290	8.98136		AT1G17680	10.5892
HORVU1Hr1G019320	24.6636		AT1G17690	6.73712
HORVU1Hr1G019330	21.6989		AT1G17720	6.91825
HORVU1Hr1G019340	9.66096		AT1G17730	3.8473
HORVU1Hr1G019390	28.0835		AT1G17760	8.78611
HORVU1Hr1G019430	3.89822		AT1G17780	11.8126
HORVU1Hr1G019570	5.57167		AT1G17790	2.4941
HORVU1Hr1G019580	12.8174		AT1G17810	1763.54
HORVU1Hr1G019590	59.875		AT1G17820	1.0473
HORVU1Hr1G019600	84.079		AT1G17830	5.17073
HORVU1Hr1G019630	38.0717		AT1G17860	11.1308
HORVU1Hr1G019640	2.56303		AT1G17870	7.4597
HORVU1Hr1G019650	17.6793		AT1G17880	110.261
HORVU1Hr1G020000	1.26918		AT1G17890	4.85962
HORVU1Hr1G020040	35.9604		AT1G17930	6.19683
HORVU1Hr1G020060	35.9604		AT1G17980	3.12565
HORVU1Hr1G020120	4.64142		AT1G17990	14.9208
HORVU1Hr1G020190	1.55357		AT1G18020	14.9208
HORVU1Hr1G020340	45.4618		AT1G18030	5.06668
HORVU1Hr1G020360	11.0911		AT1G18060	3.63555
HORVU1Hr1G020390	92.5536		AT1G18070	27.6217
HORVU1Hr1G020400	51.8916		AT1G18080	68.9589
HORVU1Hr1G020470	26.2923		AT1G18100	18.5435
HORVU1Hr1G020500	11.4733		AT1G18150	2.09607
HORVU1Hr1G020530	91.2615		AT1G18160	3.1495
HORVU1Hr1G020570	5.56152		AT1G18170	3.46657
HORVU1Hr1G020580	3.48177		AT1G18190	2.33829
HORVU1Hr1G020590	26.3532		AT1G18210	31.6469
HORVU1Hr1G020620	14.3453		AT1G18260	10.7276
HORVU1Hr1G020740	1.59322		AT1G18270	2.47923
HORVU1Hr1G021000	3.73165		AT1G18300	8.6115
HORVU1Hr1G021120	37.5835		AT1G18330	17.1392
HORVU1Hr1G021130	70.1299		AT1G18335	9.9585
HORVU1Hr1G021150	9.74845		AT1G18340	1.1948
HORVU1Hr1G021160	24.0481		AT1G18360	3.66602
HORVU1Hr1G021190	21.4479		AT1G18440	5.74857
HORVU1Hr1G021230	5.83056		AT1G18450	23.6971
HORVU1Hr1G021370	58.6285		AT1G18460	6.867
HORVU1Hr1G021530	68.8256		AT1G18470	7.54277
HORVU1Hr1G021540	32.4525		AT1G18480	3.17889
HORVU1Hr1G021550	112.299		AT1G18490	9.9315
HORVU1Hr1G021560	3.59663		AT1G18500	33.9259
HORVU1Hr1G021690	43.802		AT1G18540	68.2903
HORVU1Hr1G021700	10.0046		AT1G18600	2.23515
HORVU1Hr1G021710	31.2629		AT1G18610	3.31275
HORVU1Hr1G021720	2164.12		AT1G18630	6.75103
HORVU1Hr1G021780	156.138		AT1G18640	3.30771
HORVU1Hr1G021840	15.7501		AT1G18660	2.30494
HORVU1Hr1G021890	6.38402		AT1G18680	1.99474
HORVU1Hr1G021900	26.273		AT1G18700	6.74885
HORVU1Hr1G021990	1.48983		AT1G18720	88.8638
HORVU1Hr1G022000	8.06401		AT1G18740	2.44837
HORVU1Hr1G022100	17.4271		AT1G18750	2.08248
HORVU1Hr1G022110	2.54778		AT1G18800	39.1118
HORVU1Hr1G022130	59.0956		AT1G18840	3.99755
HORVU1Hr1G022190	12.0139		AT1G18850	13.6797
HORVU1Hr1G022250	16.394		AT1G18890	3.96552
HORVU1Hr1G022270	20.6783		AT1G18900	3.34885
HORVU1Hr1G022370	18.6948		AT1G18940	3.13683
HORVU1Hr1G022400	2.65619		AT1G18950	2.05643
HORVU1Hr1G022410	21.3278		AT1G19000	134.639
HORVU1Hr1G022420	70.2897		AT1G19010	1.98276
HORVU1Hr1G022450	3.77612		AT1G19080	5.40008
HORVU1Hr1G022470	3.16488		AT1G19100	1.85958
HORVU1Hr1G022550	16.3377		AT1G19110	5.46545
HORVU1Hr1G022570	1373.64		AT1G19120	14.2821
HORVU1Hr1G022650	23.5116		AT1G19130	19.5051
HORVU1Hr1G022660	10.4979		AT1G19140	40.3026
HORVU1Hr1G022700	13.6067		AT1G19170	3.51318
HORVU1Hr1G022720	18.1767		AT1G19180	2.22349
HORVU1Hr1G022750	127.247		AT1G19230	1.28938
HORVU1Hr1G022790	14.2303		AT1G19240	15.3268
HORVU1Hr1G022800	16.8167		AT1G19310	9.09463
HORVU1Hr1G022810	283.079		AT1G19360	1.9418
HORVU1Hr1G022840	22.5121		AT1G19370	2.3124
HORVU1Hr1G022990	13.0637		AT1G19380	5.35731
HORVU1Hr1G023030	14.8219		AT1G19394	3.99293
HORVU1Hr1G023060	29.9183		AT1G19397	4.92352
HORVU1Hr1G023070	6.12503		AT1G19400	13.413
HORVU1Hr1G023220	4.42491		AT1G19430	2.12169
HORVU1Hr1G023260	173.705		AT1G19440	10.9173
HORVU1Hr1G023270	48.0069		AT1G19480	2.29137
HORVU1Hr1G023320	3.13709		AT1G19485	2.98368
HORVU1Hr1G023480	18.0947		AT1G19490	44.1368
HORVU1Hr1G023500	70.0012		AT1G19500	12.3394
HORVU1Hr1G023510	5.29451		AT1G19520	2.39857
HORVU1Hr1G023630	83.2806		AT1G19530	369.606
HORVU1Hr1G023660	1434.13		AT1G19540	248.846
HORVU1Hr1G023670	22.0105		AT1G19550	5.63505
HORVU1Hr1G023690	1.37001		AT1G19570	85.0828
HORVU1Hr1G023730	3.12336		AT1G19580	11.9332
HORVU1Hr1G023800	7.81894		AT1G19600	31.2854
HORVU1Hr1G024020	22.7241		AT1G19610	8.36142
HORVU1Hr1G024060	31.9252		AT1G19650	2.8351
HORVU1Hr1G024070	1.4599		AT1G19660	127.955
HORVU1Hr1G024140	8.41814		AT1G19680	11.8593
HORVU1Hr1G024170	85.6202		AT1G19690	2.2915
HORVU1Hr1G024190	22.0513		AT1G19730	148.687
HORVU1Hr1G024210	40.4664		AT1G19740	16.0981
HORVU1Hr1G024230	9.37655		AT1G19750	1.25196
HORVU1Hr1G024240	78.797		AT1G19770	9.77316
HORVU1Hr1G024390	8.89171		AT1G19800	3.7042
HORVU1Hr1G024400	4.63719		AT1G19860	2.65972
HORVU1Hr1G024420	8.56361		AT1G19870	3.94541
HORVU1Hr1G024460	1.16128		AT1G19880	1.94401
HORVU1Hr1G024490	3.76256		AT1G19910	165.922
HORVU1Hr1G024510	13.58		AT1G19920	2.35172
HORVU1Hr1G024580	11.4097		AT1G19990	1.67269
HORVU1Hr1G024640	22.817		AT1G20030	4.26927
HORVU1Hr1G024660	41.5532		AT1G20050	6.46831
HORVU1Hr1G024670	25.7714		AT1G20070	77.1817
HORVU1Hr1G024700	58.8827		AT1G20090	3.26253
HORVU1Hr1G024710	2453.41		AT1G20100	55.4898
HORVU1Hr1G024740	23.4288		AT1G20110	11.5475
HORVU1Hr1G024780	3.2431		AT1G20140	33.7096
HORVU1Hr1G024790	2.92029		AT1G20200	26.0527
HORVU1Hr1G024810	159.051		AT1G20220	6.55286
HORVU1Hr1G024870	2.19488		AT1G20225	21.0258
HORVU1Hr1G025020	7.0141		AT1G20260	3.84711
HORVU1Hr1G025060	211.918		AT1G20270	4.66603
HORVU1Hr1G025100	188.307		AT1G20300	1.72072
HORVU1Hr1G025110	36.9128		AT1G20330	5.97463
HORVU1Hr1G025120	43.2494		AT1G20340	4.6242
HORVU1Hr1G025150	4.25074		AT1G20370	4.15339
HORVU1Hr1G025340	11.4344		AT1G20430	16.2212
HORVU1Hr1G025360	19.6296		AT1G20440	4.68939
HORVU1Hr1G025390	5.6151		AT1G20450	1.99118
HORVU1Hr1G025410	32.9379		AT1G20460	11.2382
HORVU1Hr1G025440	7.34146		AT1G20490	1.3485
HORVU1Hr1G025480	10.7771		AT1G20540	2.25287
HORVU1Hr1G025530	103.444		AT1G20550	4.0352
HORVU1Hr1G025570	151.762		AT1G20560	2.20567
HORVU1Hr1G025600	44.3968		AT1G20575	20.6259
HORVU1Hr1G025660	11.7233		AT1G20580	87.1518
HORVU1Hr1G025670	38.5372		AT1G20620	589.697
HORVU1Hr1G025690	6.46436		AT1G20630	41.7552
HORVU1Hr1G025750	4.11869		AT1G20640	1.42392
HORVU1Hr1G025940	6.76117		AT1G20650	23.8089
HORVU1Hr1G026050	6.77348		AT1G20670	2.55385
HORVU1Hr1G026080	49.0984		AT1G20693	333.051
HORVU1Hr1G026100	25.0307		AT1G20696	126.673
HORVU1Hr1G026130	13.6486		AT1G20760	2.72675
HORVU1Hr1G026140	33.8144		AT1G20770	22.6576
HORVU1Hr1G026330	38.0797		AT1G20780	2.57934
HORVU1Hr1G026430	27.5084		AT1G20810	5.02513
HORVU1Hr1G026530	5.0123		AT1G20816	15.954
HORVU1Hr1G026590	86.2215		AT1G20823	3.13187
HORVU1Hr1G026610	4.19501		AT1G20830	3.52849
HORVU1Hr1G026650	1.7307		AT1G20840	1.18447
HORVU1Hr1G026750	10.3594		AT1G20870	3.94778
HORVU1Hr1G026780	7.86642		AT1G20880	6.10712
HORVU1Hr1G026810	31.0509		AT1G20890	8.17572
HORVU1Hr1G026840	34.4083		AT1G20900	2.18988
HORVU1Hr1G026890	33.9297		AT1G20910	5.43686
HORVU1Hr1G026950	3.79785		AT1G20920	1.49775
HORVU1Hr1G026970	2.36286		AT1G20950	2.99538
HORVU1Hr1G026980	12433.9		AT1G20960	12.8699
HORVU1Hr1G027000	5771.05		AT1G20970	10.634
HORVU1Hr1G027040	1740.35		AT1G20980	8.95282
HORVU1Hr1G027070	88027.4		AT1G21000	745.37
HORVU1Hr1G027100	347.594		AT1G21065	114.683
HORVU1Hr1G027350	514.062		AT1G21080	25.0142
HORVU1Hr1G027400	5.22373		AT1G21160	4.05871
HORVU1Hr1G027420	75.4362		AT1G21190	117.316
HORVU1Hr1G027490	14.834		AT1G21280	4.23113
HORVU1Hr1G027550	9.73803		AT1G21310	5.02454
HORVU1Hr1G027570	8.89118		AT1G21313	3.47611
HORVU1Hr1G027600	30.3027		AT1G21350	1.86042
HORVU1Hr1G027620	149.283		AT1G21370	2.78754
HORVU1Hr1G027660	1.95786		AT1G21380	5.00068
HORVU1Hr1G027690	123.023		AT1G21390	1.75157
HORVU1Hr1G027730	6.31763		AT1G21400	8.5808
HORVU1Hr1G027770	9.63778		AT1G21410	68.5687
HORVU1Hr1G027810	3.54065		AT1G21450	13.9383
HORVU1Hr1G027840	43.5151		AT1G21460	54.9133
HORVU1Hr1G027980	4.91839		AT1G21580	1.52014
HORVU1Hr1G028030	2.33293		AT1G21590	3.10386
HORVU1Hr1G028090	16.6602		AT1G21600	26.6764
HORVU1Hr1G028190	91.8184		AT1G21610	9.18141
HORVU1Hr1G028200	26.4475		AT1G21630	4.66269
HORVU1Hr1G028280	48.4162		AT1G21640	4.31091
HORVU1Hr1G028330	13.4997		AT1G21650	3.03528
HORVU1Hr1G028450	12.7682		AT1G21660	8.10776
HORVU1Hr1G028500	13.5657		AT1G21670	2.88228
HORVU1Hr1G028510	13.5657		AT1G21680	76.4424
HORVU1Hr1G028570	3.57204		AT1G21690	5.86528
HORVU1Hr1G028680	20.1349		AT1G21700	5.02157
HORVU1Hr1G028720	253.59		AT1G21720	34.2363
HORVU1Hr1G028780	17.9599		AT1G21750	4.64654
HORVU1Hr1G028820	829.787		AT1G21760	52.6055
HORVU1Hr1G028890	12.2864		AT1G21770	708.555
HORVU1Hr1G028920	5.21671		AT1G21780	71.1616
HORVU1Hr1G029070	6.22534		AT1G21790	24.2374
HORVU1Hr1G029090	39.3912		AT1G21900	35.241
HORVU1Hr1G029110	2.91072		AT1G21920	6.4815
HORVU1Hr1G029270	3.22807		AT1G21930	10.0921
HORVU1Hr1G029280	1.668		AT1G22020	3.99096
HORVU1Hr1G029370	91.1613		AT1G22040	3.13013
HORVU1Hr1G029460	23.7894		AT1G22050	10.227
HORVU1Hr1G029480	4.39714		AT1G22070	7.23725
HORVU1Hr1G029490	16.2791		AT1G22110	3.89402
HORVU1Hr1G029770	10.3779		AT1G22140	31.6921
HORVU1Hr1G029800	16.3317		AT1G22180	19.7938
HORVU1Hr1G029870	267.144		AT1G22190	261.919
HORVU1Hr1G029950	21.2027		AT1G22200	30.4273
HORVU1Hr1G030000	69.2862		AT1G22250	8.85252
HORVU1Hr1G030030	70.8272		AT1G22270	65.8454
HORVU1Hr1G030040	3.71238		AT1G22280	19.4196
HORVU1Hr1G030100	3.16361		AT1G22300	47.8619
HORVU1Hr1G030140	37.0678		AT1G22310	1.46445
HORVU1Hr1G030200	10.7131		AT1G22360	3.14277
HORVU1Hr1G030230	3.48657		AT1G22370	31.0659
HORVU1Hr1G030390	5.4705		AT1G22380	2.85488
HORVU1Hr1G030480	9.43966		AT1G22400	12.2462
HORVU1Hr1G030630	24.7785		AT1G22410	12.4223
HORVU1Hr1G030660	92.3924		AT1G22430	3.12184
HORVU1Hr1G030710	2.16847		AT1G22450	33.0517
HORVU1Hr1G030740	3.27033		AT1G22500	13.9478
HORVU1Hr1G030790	33.489		AT1G22510	5.05905
HORVU1Hr1G030800	2.13216		AT1G22520	18.9339
HORVU1Hr1G030870	3.1105		AT1G22530	3.93306
HORVU1Hr1G030930	2.31163		AT1G22570	1.19447
HORVU1Hr1G031010	1.9208		AT1G22600	37.7195
HORVU1Hr1G031050	2.8286		AT1G22610	13.9108
HORVU1Hr1G031180	10.3134		AT1G22620	2.72351
HORVU1Hr1G031220	27.8081		AT1G22640	5.04626
HORVU1Hr1G031230	15.4648		AT1G22660	2.72693
HORVU1Hr1G031270	1.49652		AT1G22700	14.607
HORVU1Hr1G031300	4.199		AT1G22710	1.8516
HORVU1Hr1G031310	19.6801		AT1G22730	5.41541
HORVU1Hr1G031370	9.22514		AT1G22740	2.95827
HORVU1Hr1G031490	79.6694		AT1G22750	4.15021
HORVU1Hr1G031500	13.6728		AT1G22770	2.64041
HORVU1Hr1G031510	6.87516		AT1G22780	105.422
HORVU1Hr1G031600	221.538		AT1G22790	18.336
HORVU1Hr1G031660	16.4955		AT1G22800	24.0123
HORVU1Hr1G031860	15.9131		AT1G22830	1.62645
HORVU1Hr1G031950	31.5029		AT1G22840	141.652
HORVU1Hr1G032060	78.3964		AT1G22850	3.10129
HORVU1Hr1G032190	100.272		AT1G22860	2.0473
HORVU1Hr1G032310	21.7442		AT1G22880	5.58615
HORVU1Hr1G032450	3.02519		AT1G22890	3.80574
HORVU1Hr1G032510	59.9134		AT1G22920	15.2564
HORVU1Hr1G032610	2.51997		AT1G22930	23.8494
HORVU1Hr1G032670	14.9425		AT1G22940	7.78992
HORVU1Hr1G032850	32.4412		AT1G22950	3.78262
HORVU1Hr1G032900	11.6833		AT1G22970	18.1684
HORVU1Hr1G032940	9.66919		AT1G22985	56.1951
HORVU1Hr1G032960	18.6142		AT1G23000	1.09697
HORVU1Hr1G033060	4.25575		AT1G23010	1.40694
HORVU1Hr1G033110	18.8664		AT1G23040	5.37442
HORVU1Hr1G033120	4.35956		AT1G23050	21.1713
HORVU1Hr1G033130	20.3113		AT1G23070	178.033
HORVU1Hr1G033210	3.9907		AT1G23090	1.30177
HORVU1Hr1G033270	16.6458		AT1G23100	10.1418
HORVU1Hr1G033370	9.88999		AT1G23120	6.86401
HORVU1Hr1G033390	8.33491		AT1G23150	3.69622
HORVU1Hr1G033470	18.3837		AT1G23180	5.8572
HORVU1Hr1G033560	7.39585		AT1G23190	3.56695
HORVU1Hr1G033630	17.0051		AT1G23201	3.53657
HORVU1Hr1G033690	30.5281		AT1G23220	34.3849
HORVU1Hr1G033740	8.6439		AT1G23230	1.46412
HORVU1Hr1G033800	34.7529		AT1G23260	10.3544
HORVU1Hr1G034070	11.876		AT1G23280	19.8248
HORVU1Hr1G034140	5.30304		AT1G23290	251.946
HORVU1Hr1G034400	6.58461		AT1G23310	18.9518
HORVU1Hr1G034410	7.2819		AT1G23350	6.50333
HORVU1Hr1G034470	8.26664		AT1G23360	1.67547
HORVU1Hr1G034490	8.16924		AT1G23380	3.44952
HORVU1Hr1G034570	3.59021		AT1G23400	8.21694
HORVU1Hr1G034630	28.6561		AT1G23410	5.35888
HORVU1Hr1G034650	2.65155		AT1G23440	53.863
HORVU1Hr1G034730	26.809		AT1G23460	4.35192
HORVU1Hr1G034880	18.4376		AT1G23490	48.3428
HORVU1Hr1G034960	5.00565		AT1G23550	19.6874
HORVU1Hr1G034980	60.9425		AT1G23710	64.2325
HORVU1Hr1G035100	11.187		AT1G23740	3.27452
HORVU1Hr1G035200	4.75561		AT1G23780	37.2617
HORVU1Hr1G035210	25.931		AT1G23820	89.3664
HORVU1Hr1G035260	9.59188		AT1G23860	26.5019
HORVU1Hr1G035280	2.70924		AT1G23870	3.3493
HORVU1Hr1G035340	2.30417		AT1G23890	2.35246
HORVU1Hr1G035390	29.7599		AT1G23900	3.50488
HORVU1Hr1G035440	10.5702		AT1G23935	2.01653
HORVU1Hr1G035470	5.24709		AT1G23950	72.138
HORVU1Hr1G035490	69.4149		AT1G23960	47.5037
HORVU1Hr1G035600	13.8863		AT1G23970	11.3645
HORVU1Hr1G035640	10.1489		AT1G23980	1.91032
HORVU1Hr1G035880	22.8239		AT1G24020	1.51336
HORVU1Hr1G035930	19.4354		AT1G24030	1.29776
HORVU1Hr1G035960	4.16465		AT1G24040	11.1943
HORVU1Hr1G036040	31.5071		AT1G24050	50.3269
HORVU1Hr1G036060	1.38593		AT1G24090	9.95391
HORVU1Hr1G036120	3.65625		AT1G24100	2.77368
HORVU1Hr1G036200	4.80567		AT1G24120	5.12516
HORVU1Hr1G036250	17.1108		AT1G24160	4.99001
HORVU1Hr1G036280	8.98125		AT1G24180	55.7111
HORVU1Hr1G036300	5.04783		AT1G24190	3.65299
HORVU1Hr1G036350	3.26936		AT1G24210	3.82766
HORVU1Hr1G036390	1.85957		AT1G24240	2.66761
HORVU1Hr1G036420	10.5587		AT1G24265	6.27751
HORVU1Hr1G036500	4.28128		AT1G24267	13.6683
HORVU1Hr1G036640	37.7531		AT1G24290	2.00023
HORVU1Hr1G036700	1.83039		AT1G24300	2.82266
HORVU1Hr1G036710	1.98509		AT1G24310	3.27884
HORVU1Hr1G036920	30.0593		AT1G24340	4.30332
HORVU1Hr1G036990	3.31467		AT1G24350	6.41474
HORVU1Hr1G037250	1.79312		AT1G24360	4.31507
HORVU1Hr1G037300	6.33347		AT1G24440	29.1174
HORVU1Hr1G037320	2.32143		AT1G24450	9.59529
HORVU1Hr1G037340	41.5828		AT1G24460	4.3671
HORVU1Hr1G037380	14.9302		AT1G24490	30.8462
HORVU1Hr1G037460	1.69412		AT1G24510	41.394
HORVU1Hr1G037550	6.36061		AT1G24520	7.35583
HORVU1Hr1G037580	18.2982		AT1G24530	2.39708
HORVU1Hr1G037590	27.2432		AT1G24560	4.2526
HORVU1Hr1G037620	7.26613		AT1G24580	41.7303
HORVU1Hr1G037650	2.07986		AT1G24600	30.7419
HORVU1Hr1G037730	8.07551		AT1G24610	3.52996
HORVU1Hr1G037760	4.33427		AT1G24706	3.84018
HORVU1Hr1G037800	51.3622		AT1G24735	162.664
HORVU1Hr1G037810	17.6825		AT1G24764	1.16618
HORVU1Hr1G037920	191.551		AT1G24793	2.0384
HORVU1Hr1G037980	18.6735		AT1G24800	11.1493
HORVU1Hr1G038000	827.419		AT1G24880	56.2537
HORVU1Hr1G038060	46.3592		AT1G24881	11.1493
HORVU1Hr1G038070	3.48397		AT1G24996	53.2101
HORVU1Hr1G038120	11.3436		AT1G25054	2.0384
HORVU1Hr1G038180	1.97142		AT1G25055	11.1493
HORVU1Hr1G038240	26.6101		AT1G25145	2.0384
HORVU1Hr1G038270	113.917		AT1G25150	11.1493
HORVU1Hr1G038280	24.1481		AT1G25210	2.0384
HORVU1Hr1G038330	15.0343		AT1G25211	18.3451
HORVU1Hr1G038370	6.42234		AT1G25220	4.02412
HORVU1Hr1G038410	9.17854		AT1G25260	47.4448
HORVU1Hr1G038490	6.56281		AT1G25275	37.0113
HORVU1Hr1G038570	15.5569		AT1G25280	8.23083
HORVU1Hr1G038580	3.05079		AT1G25290	1.53967
HORVU1Hr1G038620	4.63771		AT1G25310	25.1428
HORVU1Hr1G038680	39.9613		AT1G25350	4.15753
HORVU1Hr1G038700	18.7181		AT1G25370	3.21367
HORVU1Hr1G038780	14.3986		AT1G25380	5.56398
HORVU1Hr1G038800	3.45003		AT1G25420	18.6859
HORVU1Hr1G038820	10.3964		AT1G25422	38.5517
HORVU1Hr1G038840	19.6904		AT1G25470	2.54512
HORVU1Hr1G038850	39.3957		AT1G25490	11.9991
HORVU1Hr1G038880	4.85393		AT1G25520	3.31788
HORVU1Hr1G038890	1837.81		AT1G25530	1.46082
HORVU1Hr1G038990	6.44238		AT1G25540	4.38782
HORVU1Hr1G039000	16.2668		AT1G25580	3.63682
HORVU1Hr1G039050	67.3176		AT1G25682	38.9271
HORVU1Hr1G039090	3.31019		AT1G26090	2.37388
HORVU1Hr1G039100	3.02568		AT1G26110	22.8183
HORVU1Hr1G039160	298.404		AT1G26120	1.44735
HORVU1Hr1G039230	9.13738		AT1G26160	20.3063
HORVU1Hr1G039260	188.903		AT1G26170	2.41533
HORVU1Hr1G039370	4.35436		AT1G26180	2.49395
HORVU1Hr1G039540	30.9553		AT1G26190	1.89525
HORVU1Hr1G039580	31.6531		AT1G26260	1.13831
HORVU1Hr1G039670	1.91424		AT1G26270	6.25131
HORVU1Hr1G039700	7.51144		AT1G26300	10.7646
HORVU1Hr1G039790	60.919		AT1G26340	3.44709
HORVU1Hr1G039800	11.1014		AT1G26370	2.62838
HORVU1Hr1G039870	73.6322		AT1G26400	13.6615
HORVU1Hr1G039880	12.0557		AT1G26440	7.84867
HORVU1Hr1G040050	3.69594		AT1G26460	3.66768
HORVU1Hr1G040110	10.7199		AT1G26470	209.413
HORVU1Hr1G040250	9.04072		AT1G26520	2.31102
HORVU1Hr1G040450	36.5324		AT1G26550	81.9551
HORVU1Hr1G040560	15.0949		AT1G26580	7.63206
HORVU1Hr1G040570	2.32678		AT1G26630	139.706
HORVU1Hr1G040590	2.70551		AT1G26640	2.0301
HORVU1Hr1G040670	10.7287		AT1G26650	1.78023
HORVU1Hr1G040850	2.73411		AT1G26660	35.0704
HORVU1Hr1G040930	32.8835		AT1G26665	172.226
HORVU1Hr1G040970	2.46488		AT1G26670	55.8177
HORVU1Hr1G040980	21.7293		AT1G26740	15.5755
HORVU1Hr1G041020	1.85487		AT1G26750	5.17483
HORVU1Hr1G041030	7.18881		AT1G26762	1.93094
HORVU1Hr1G041060	8.8029		AT1G26770	8.23308
HORVU1Hr1G041110	1.99723		AT1G26800	110.636
HORVU1Hr1G041150	17.5723		AT1G26830	16.2136
HORVU1Hr1G041220	6.03612		AT1G26850	15.9136
HORVU1Hr1G041250	319.746		AT1G26880	103.128
HORVU1Hr1G041280	5.49692		AT1G26910	2.35387
HORVU1Hr1G041290	10.382		AT1G26920	2.54828
HORVU1Hr1G041440	3.9932		AT1G26940	5.76473
HORVU1Hr1G041460	2.09593		AT1G27000	42.7255
HORVU1Hr1G041480	5.05867		AT1G27030	6.07861
HORVU1Hr1G041530	32.4907		AT1G27050	5.19091
HORVU1Hr1G041630	5.06646		AT1G27060	1.20873
HORVU1Hr1G041650	2.26933		AT1G27070	2.83351
HORVU1Hr1G041710	35.7563		AT1G27090	44.5711
HORVU1Hr1G041740	3.57219		AT1G27100	1.34244
HORVU1Hr1G041770	12.7201		AT1G27130	13.4723
HORVU1Hr1G041790	11.048		AT1G27150	107.759
HORVU1Hr1G041820	7.7085		AT1G27190	2.1516
HORVU1Hr1G041910	44.5354		AT1G27290	91.251
HORVU1Hr1G041970	178.638		AT1G27300	367.323
HORVU1Hr1G041990	17.9674		AT1G27310	33.5682
HORVU1Hr1G042020	19.4387		AT1G27320	8.1104
HORVU1Hr1G042030	17.3575		AT1G27330	23.7673
HORVU1Hr1G042050	27.776		AT1G27340	1.55747
HORVU1Hr1G042060	9.51159		AT1G27350	67.365
HORVU1Hr1G042080	4.92591		AT1G27385	17.9021
HORVU1Hr1G042140	13.3125		AT1G27390	24.7562
HORVU1Hr1G042220	677.495		AT1G27400	49.2651
HORVU1Hr1G042250	5.92476		AT1G27430	6.03477
HORVU1Hr1G042270	390.24		AT1G27435	40.3931
HORVU1Hr1G042280	15.8275		AT1G27450	5.76539
HORVU1Hr1G042340	11.3219		AT1G27461	178.343
HORVU1Hr1G042350	12.0572		AT1G27470	8.95182
HORVU1Hr1G042420	98.2967		AT1G27500	4.82341
HORVU1Hr1G042450	9.87458		AT1G27510	32.514
HORVU1Hr1G042490	5.25549		AT1G27520	1.90581
HORVU1Hr1G042520	16.5329		AT1G27530	159.39
HORVU1Hr1G042550	16.9559		AT1G27540	7.71548
HORVU1Hr1G042560	7.82946		AT1G27595	2.3659
HORVU1Hr1G042690	1.99293		AT1G27600	9.60455
HORVU1Hr1G042790	10.423		AT1G27630	12.1128
HORVU1Hr1G042820	59.6609		AT1G27640	59.8551
HORVU1Hr1G042900	13.8766		AT1G27650	113.172
HORVU1Hr1G042920	214.98		AT1G27680	3.5518
HORVU1Hr1G043110	18.4101		AT1G27690	2.13133
HORVU1Hr1G043150	3.56534		AT1G27695	5.85376
HORVU1Hr1G043220	11.0097		AT1G27730	14.8272
HORVU1Hr1G043250	108.509		AT1G27750	5.56133
HORVU1Hr1G043280	2.50059		AT1G27752	5.26313
HORVU1Hr1G043440	26.0677		AT1G27760	24.4372
HORVU1Hr1G043580	1.51941		AT1G27770	1.57535
HORVU1Hr1G043640	22.1169		AT1G27840	8.79095
HORVU1Hr1G043660	18.132		AT1G27850	1.32065
HORVU1Hr1G043680	17.8765		AT1G27900	5.81605
HORVU1Hr1G043710	11.7121		AT1G27910	3.41983
HORVU1Hr1G043820	4.81117		AT1G27950	76.5268
HORVU1Hr1G043830	3.8453		AT1G27960	4.2263
HORVU1Hr1G043870	34.4918		AT1G27970	17.664
HORVU1Hr1G043890	571.185		AT1G27980	16.3485
HORVU1Hr1G043910	2.76448		AT1G27990	607.617
HORVU1Hr1G043930	2.50098		AT1G28050	19.3461
HORVU1Hr1G043940	27.0774		AT1G28060	2.51332
HORVU1Hr1G044000	102.921		AT1G28070	1.69186
HORVU1Hr1G044020	5.43316		AT1G28090	1.19483
HORVU1Hr1G044120	4.68292		AT1G28100	1.78774
HORVU1Hr1G044140	7.93917		AT1G28120	9.40194
HORVU1Hr1G044160	134.737		AT1G28140	40.589
HORVU1Hr1G044350	6.55845		AT1G28150	21.5965
HORVU1Hr1G044420	5.6932		AT1G28200	29.0195
HORVU1Hr1G044440	7.85873		AT1G28210	4.1123
HORVU1Hr1G044500	9.81583		AT1G28230	2.48886
HORVU1Hr1G044530	54.4741		AT1G28250	16.1488
HORVU1Hr1G044540	2.85611		AT1G28270	19.7616
HORVU1Hr1G044570	10.9799		AT1G28320	2.70904
HORVU1Hr1G044590	19.611		AT1G28330	572.52
HORVU1Hr1G044680	1.31053		AT1G28340	3.42767
HORVU1Hr1G044710	9.39036		AT1G28350	1.60094
HORVU1Hr1G044740	4.97138		AT1G28360	60.5645
HORVU1Hr1G044750	18.0809		AT1G28380	2.29945
HORVU1Hr1G044780	51.629		AT1G28395	6.51266
HORVU1Hr1G044810	12.0357		AT1G28420	2.45675
HORVU1Hr1G044820	20.4136		AT1G28490	11.3733
HORVU1Hr1G044930	8.88724		AT1G28520	16.5362
HORVU1Hr1G044960	5.47882		AT1G28530	4.33294
HORVU1Hr1G045070	18.0047		AT1G28540	85.4197
HORVU1Hr1G045080	3.18509		AT1G28560	3.47921
HORVU1Hr1G045110	215.381		AT1G28640	5.54467
HORVU1Hr1G045130	190.439		AT1G28760	1.40058
HORVU1Hr1G045160	29.6118		AT1G28960	4.33942
HORVU1Hr1G045170	5.1904		AT1G29030	5.18532
HORVU1Hr1G045190	3.68605		AT1G29040	5.19028
HORVU1Hr1G045220	24.7017		AT1G29060	10.2336
HORVU1Hr1G045280	15.1536		AT1G29070	14.5105
HORVU1Hr1G045310	21.2171		AT1G29120	15.5661
HORVU1Hr1G045360	124.108		AT1G29140	1.17412
HORVU1Hr1G045490	21.8829		AT1G29150	51.4919
HORVU1Hr1G045520	8.87848		AT1G29195	3.51017
HORVU1Hr1G045590	33.7364		AT1G29220	16.1574
HORVU1Hr1G045610	15.3848		AT1G29250	76.2827
HORVU1Hr1G045630	224.702		AT1G29260	20.2494
HORVU1Hr1G045640	37.8883		AT1G29320	33.1321
HORVU1Hr1G045670	6.8262		AT1G29330	26.9849
HORVU1Hr1G045720	13.5182		AT1G29340	7.01198
HORVU1Hr1G046010	19.8563		AT1G29350	25.183
HORVU1Hr1G046020	28.1675		AT1G29355	7.48822
HORVU1Hr1G046270	5.26413		AT1G29370	27.5444
HORVU1Hr1G046320	1.46391		AT1G29400	21.7024
HORVU1Hr1G046400	4.00868		AT1G29418	34.8973
HORVU1Hr1G046420	28.8264		AT1G29470	6.16268
HORVU1Hr1G046540	1.73762		AT1G29680	460.17
HORVU1Hr1G046560	1.92703		AT1G29700	1.97028
HORVU1Hr1G046570	115.879		AT1G29710	2.31701
HORVU1Hr1G046600	4.41079		AT1G29760	18.6707
HORVU1Hr1G046610	16.2563		AT1G29770	1.49392
HORVU1Hr1G046620	3.64999		AT1G29790	11.4101
HORVU1Hr1G046670	17.063		AT1G29800	6.24875
HORVU1Hr1G046710	1.60703		AT1G29810	18.357
HORVU1Hr1G046740	1.3519		AT1G29820	7.05352
HORVU1Hr1G046870	91.6623		AT1G29850	54.907
HORVU1Hr1G046940	1.71757		AT1G29880	6.08295
HORVU1Hr1G046990	20.209		AT1G29900	8.98789
HORVU1Hr1G047000	3.04094		AT1G29910	3.1378
HORVU1Hr1G047030	6.65201		AT1G29920	2.33384
HORVU1Hr1G047060	9.59409		AT1G29930	12.3349
HORVU1Hr1G047090	1.66723		AT1G29940	5.93445
HORVU1Hr1G047100	3.38632		AT1G29950	5.86321
HORVU1Hr1G047110	6.44607		AT1G29960	2.62809
HORVU1Hr1G047180	18.6815		AT1G29970	17.7324
HORVU1Hr1G047290	8.81743		AT1G29980	1.63554
HORVU1Hr1G047300	9.83695		AT1G29990	23.2595
HORVU1Hr1G047350	1.3964		AT1G30000	2.06255
HORVU1Hr1G047390	2.64764		AT1G30070	199.642
HORVU1Hr1G047410	7.82343		AT1G30090	8.98979
HORVU1Hr1G047440	16.2443		AT1G30110	10.3834
HORVU1Hr1G047610	12.476		AT1G30130	3.35899
HORVU1Hr1G047660	4.4289		AT1G30135	7.703
HORVU1Hr1G047680	41.6115		AT1G30190	3.14094
HORVU1Hr1G047690	4.84449		AT1G30200	18.1965
HORVU1Hr1G047710	3.84188		AT1G30210	1.86136
HORVU1Hr1G047720	6.12576		AT1G30220	1.59287
HORVU1Hr1G047730	16.2609		AT1G30230	210.273
HORVU1Hr1G047770	3.49508		AT1G30240	1.2729
HORVU1Hr1G047800	3.91197		AT1G30260	9.70132
HORVU1Hr1G047820	2.76666		AT1G30270	3.25705
HORVU1Hr1G047910	14.4153		AT1G30300	1.69933
HORVU1Hr1G047980	23.138		AT1G30320	7.22422
HORVU1Hr1G047990	277.06		AT1G30330	1.35105
HORVU1Hr1G048000	7.30781		AT1G30360	9.20855
HORVU1Hr1G048230	4.78364		AT1G30380	4.01438
HORVU1Hr1G048250	11.726		AT1G30400	2.61553
HORVU1Hr1G048280	10.937		AT1G30460	4.50885
HORVU1Hr1G048350	19.6244		AT1G30470	6.25141
HORVU1Hr1G048360	23.0137		AT1G30475	24.1859
HORVU1Hr1G048390	20.8098		AT1G30480	8.81232
HORVU1Hr1G048400	36.2957		AT1G30500	134.472
HORVU1Hr1G048410	19.8784		AT1G30510	6.21827
HORVU1Hr1G048450	41.5423		AT1G30530	2.34378
HORVU1Hr1G048470	3.73543		AT1G30540	5.84459
HORVU1Hr1G048480	12.9773		AT1G30580	62.4744
HORVU1Hr1G048560	12.8846		AT1G30590	5.84342
HORVU1Hr1G048580	72.9259		AT1G30620	3.71106
HORVU1Hr1G048620	23.7761		AT1G30630	11.2743
HORVU1Hr1G048690	32.0376		AT1G30640	4.30001
HORVU1Hr1G048700	31.9706		AT1G30680	6.76741
HORVU1Hr1G048720	2.51905		AT1G30755	1.70916
HORVU1Hr1G048840	33.3337		AT1G30810	7.98387
HORVU1Hr1G048900	6.35296		AT1G30820	2.03299
HORVU1Hr1G048920	3.46395		AT1G30845	1.51336
HORVU1Hr1G048970	18.3292		AT1G30860	64.081
HORVU1Hr1G049000	6.28948		AT1G30880	228.148
HORVU1Hr1G049060	13.8303		AT1G30890	2.24372
HORVU1Hr1G049070	36.0249		AT1G30910	8.16758
HORVU1Hr1G049090	20.653		AT1G30960	3.66203
HORVU1Hr1G049100	6.44986		AT1G30970	5.77528
HORVU1Hr1G049210	4.51216		AT1G31010	7.37483
HORVU1Hr1G049230	28.0453		AT1G31020	8.45415
HORVU1Hr1G049260	3.5869		AT1G31120	2.99526
HORVU1Hr1G049270	3.52084		AT1G31130	8.94918
HORVU1Hr1G049280	8.60418		AT1G31160	8.42707
HORVU1Hr1G049320	8.33482		AT1G31170	50.7777
HORVU1Hr1G049460	16.4902		AT1G31175	2.77648
HORVU1Hr1G049480	4.33383		AT1G31180	10.7419
HORVU1Hr1G049490	2.96183		AT1G31190	7.70993
HORVU1Hr1G049500	21.688		AT1G31220	2.95556
HORVU1Hr1G049520	153.695		AT1G31230	1.86896
HORVU1Hr1G049550	4.34987		AT1G31280	2.70547
HORVU1Hr1G049590	19.88		AT1G31300	3.90952
HORVU1Hr1G049660	9.13793		AT1G31310	1.26143
HORVU1Hr1G049690	25.2147		AT1G31320	6.00064
HORVU1Hr1G049790	5.11543		AT1G31330	2.69155
HORVU1Hr1G049810	3.524		AT1G31340	23.6158
HORVU1Hr1G049860	12.102		AT1G31410	2.94363
HORVU1Hr1G049900	6.44239		AT1G31420	1.39775
HORVU1Hr1G049940	9.89571		AT1G31440	24.6984
HORVU1Hr1G049960	30.9398		AT1G31460	3.94519
HORVU1Hr1G049980	54.7874		AT1G31470	2.2087
HORVU1Hr1G050020	6.94416		AT1G31480	3.7149
HORVU1Hr1G050040	20.5674		AT1G31500	3.46973
HORVU1Hr1G050050	5.97974		AT1G31600	8.0375
HORVU1Hr1G050110	4.03223		AT1G31660	7.39464
HORVU1Hr1G050220	181.648		AT1G31730	8.82126
HORVU1Hr1G050290	17.6045		AT1G31750	135.737
HORVU1Hr1G050340	6.76825		AT1G31760	9.69098
HORVU1Hr1G050380	2.78408		AT1G31780	2.28457
HORVU1Hr1G050450	1.41003		AT1G31790	5.16731
HORVU1Hr1G050520	153.654		AT1G31810	2.63577
HORVU1Hr1G050560	4.11374		AT1G31812	28.4203
HORVU1Hr1G050580	1.56995		AT1G31814	2.20865
HORVU1Hr1G050620	1.2347		AT1G31817	8.74393
HORVU1Hr1G050640	9.34946		AT1G31830	14.4562
HORVU1Hr1G050650	4.44464		AT1G31835	7.06128
HORVU1Hr1G050740	175.819		AT1G31850	8.04082
HORVU1Hr1G050750	12.5541		AT1G31860	8.31636
HORVU1Hr1G050760	20.0044		AT1G31870	5.58807
HORVU1Hr1G050780	7.87021		AT1G31910	23.3493
HORVU1Hr1G050810	13.3519		AT1G31930	8.14728
HORVU1Hr1G050850	3.08063		AT1G31940	2.67678
HORVU1Hr1G050880	16.9026		AT1G31970	19.693
HORVU1Hr1G050900	4.39207		AT1G32050	157.647
HORVU1Hr1G050920	19.9983		AT1G32070	7.17155
HORVU1Hr1G050960	84.3399		AT1G32127	6.1856
HORVU1Hr1G050970	2.04399		AT1G32130	21.0218
HORVU1Hr1G051020	7.658		AT1G32150	4.93368
HORVU1Hr1G051040	7.658		AT1G32160	6.36327
HORVU1Hr1G051080	10.745		AT1G32200	1.69874
HORVU1Hr1G051200	7.64936		AT1G32210	14.9402
HORVU1Hr1G051210	1.53571		AT1G32220	7.8573
HORVU1Hr1G051250	27.9901		AT1G32230	47.088
HORVU1Hr1G051280	187.292		AT1G32260	21.4101
HORVU1Hr1G051290	17.6027		AT1G32310	6.46057
HORVU1Hr1G051310	19.686		AT1G32330	1.38162
HORVU1Hr1G051350	71.0156		AT1G32340	2.92743
HORVU1Hr1G051370	7.98562		AT1G32360	7.80461
HORVU1Hr1G051380	65.2186		AT1G32370	3.52613
HORVU1Hr1G051410	76.1855		AT1G32380	46.5735
HORVU1Hr1G051420	72.6026		AT1G32400	97.6205
HORVU1Hr1G051440	4.23895		AT1G32410	10.3245
HORVU1Hr1G051460	3.94778		AT1G32450	3.96659
HORVU1Hr1G051470	2.09699		AT1G32460	58.8123
HORVU1Hr1G051510	8.11516		AT1G32490	6.68727
HORVU1Hr1G051570	20.1192		AT1G32500	6.62149
HORVU1Hr1G051610	103.415		AT1G32520	4.68782
HORVU1Hr1G051840	46.4871		AT1G32530	6.37501
HORVU1Hr1G051950	12.4903		AT1G32550	30.6359
HORVU1Hr1G051970	3.03639		AT1G32560	3661.07
HORVU1Hr1G052000	2.12617		AT1G32580	23.0629
HORVU1Hr1G052030	81.406		AT1G32630	11.5489
HORVU1Hr1G052040	134.857		AT1G32700	25.7231
HORVU1Hr1G052110	3.88524		AT1G32710	181.214
HORVU1Hr1G052150	5.59544		AT1G32730	2.42582
HORVU1Hr1G052160	60.6487		AT1G32740	2.81718
HORVU1Hr1G052180	2514.8		AT1G32750	5.14006
HORVU1Hr1G052230	54.3134		AT1G32760	3.96908
HORVU1Hr1G052260	27.0411		AT1G32790	98.4166
HORVU1Hr1G052290	5.41948		AT1G32810	6.9806
HORVU1Hr1G052350	9.26872		AT1G32870	10.1126
HORVU1Hr1G052370	4.95206		AT1G32920	76.4169
HORVU1Hr1G052420	35.9721		AT1G32928	6.58778
HORVU1Hr1G052430	78.7292		AT1G32990	7.26745
HORVU1Hr1G052530	1.88779		AT1G33040	4.2679
HORVU1Hr1G052560	24.3328		AT1G33050	33.3962
HORVU1Hr1G052620	1.78268		AT1G33055	4.50879
HORVU1Hr1G052660	1.40586		AT1G33060	7.8737
HORVU1Hr1G052730	6.70158		AT1G33110	10.2773
HORVU1Hr1G052760	47.9355		AT1G33120	141.651
HORVU1Hr1G052770	36.7609		AT1G33140	149.841
HORVU1Hr1G052780	1.35515		AT1G33230	27.4576
HORVU1Hr1G052840	41.4575		AT1G33250	5.5676
HORVU1Hr1G052850	30.6523		AT1G33265	30.0684
HORVU1Hr1G052880	3.58229		AT1G33270	28.5843
HORVU1Hr1G052890	117.263		AT1G33290	18.9378
HORVU1Hr1G052910	54.9426		AT1G33340	1.46801
HORVU1Hr1G052970	46.0326		AT1G33360	2.85353
HORVU1Hr1G053000	2.12225		AT1G33390	1.822
HORVU1Hr1G053020	13.7223		AT1G33400	3.07584
HORVU1Hr1G053070	5.41306		AT1G33410	3.61316
HORVU1Hr1G053080	4.07969		AT1G33420	6.0422
HORVU1Hr1G053090	7.1923		AT1G33480	1.65017
HORVU1Hr1G053170	83.8191		AT1G33490	128.152
HORVU1Hr1G053190	15.2177		AT1G33520	8.02686
HORVU1Hr1G053280	15.3067		AT1G33680	12.7365
HORVU1Hr1G053320	21.0955		AT1G33780	8.20315
HORVU1Hr1G053340	3.9783		AT1G33790	10.1564
HORVU1Hr1G053440	8.51399		AT1G33810	36.1661
HORVU1Hr1G053600	83.5392		AT1G33860	152.572
HORVU1Hr1G053770	5.42556		AT1G33970	22.506
HORVU1Hr1G053840	39.8738		AT1G33980	12.0848
HORVU1Hr1G053900	39.0212		AT1G33990	80.8838
HORVU1Hr1G053930	3.39765		AT1G34000	11.0989
HORVU1Hr1G054040	9.81191		AT1G34030	92.273
HORVU1Hr1G054110	4.17269		AT1G34047	14.8893
HORVU1Hr1G054150	2.95204		AT1G34110	1.6493
HORVU1Hr1G054180	3.09294		AT1G34130	3.12977
HORVU1Hr1G054200	3.21595		AT1G34150	3.18722
HORVU1Hr1G054240	7.34658		AT1G34160	1.80483
HORVU1Hr1G054250	6.30876		AT1G34180	3.10261
HORVU1Hr1G054290	8.31188		AT1G34190	19.6644
HORVU1Hr1G054300	2.50434		AT1G34200	4.94248
HORVU1Hr1G054320	2.39154		AT1G34220	5.73542
HORVU1Hr1G054340	19.5254		AT1G34260	1.37812
HORVU1Hr1G054380	14.6587		AT1G34270	1.36585
HORVU1Hr1G054390	1.43984		AT1G34300	4.84801
HORVU1Hr1G054430	3.50929		AT1G34320	4.06064
HORVU1Hr1G054450	26.6544		AT1G34350	2.69978
HORVU1Hr1G054470	12.9727		AT1G34360	1.38479
HORVU1Hr1G054530	9.7639		AT1G34370	196.744
HORVU1Hr1G054560	6.1513		AT1G34380	3.96807
HORVU1Hr1G054580	2.755		AT1G34470	1.93244
HORVU1Hr1G054590	11.4776		AT1G34550	1.4496
HORVU1Hr1G054610	9.31861		AT1G34570	11.5428
HORVU1Hr1G054620	9.38994		AT1G34580	3.57605
HORVU1Hr1G054630	52.0256		AT1G34630	9.07217
HORVU1Hr1G055000	1.86497		AT1G34640	6.88299
HORVU1Hr1G055010	2.27196		AT1G34760	15.3572
HORVU1Hr1G055210	13.1116		AT1G34770	6.90317
HORVU1Hr1G055220	15.2942		AT1G34780	16.6419
HORVU1Hr1G055250	78.8684		AT1G35160	16.3575
HORVU1Hr1G055300	60.6007		AT1G35190	43.7535
HORVU1Hr1G055340	20.2507		AT1G35340	2.5103
HORVU1Hr1G055420	25.0254		AT1G35420	2.1476
HORVU1Hr1G055440	1397.02		AT1G35460	53.5542
HORVU1Hr1G055460	7.79747		AT1G35470	9.9101
HORVU1Hr1G055480	47.6805		AT1G35516	82.2747
HORVU1Hr1G055490	13.4275		AT1G35580	1.37227
HORVU1Hr1G055520	209.201		AT1G35620	17.1519
HORVU1Hr1G055530	6.51558		AT1G35660	2.20266
HORVU1Hr1G055570	4.36231		AT1G35670	3.30916
HORVU1Hr1G055580	27.2612		AT1G35680	13.4755
HORVU1Hr1G055600	4.17735		AT1G35720	59.7361
HORVU1Hr1G055740	13.2103		AT1G36050	14.9375
HORVU1Hr1G055800	1.89403		AT1G36060	18.3624
HORVU1Hr1G055860	131.65		AT1G36070	5.97603
HORVU1Hr1G055890	72.2519		AT1G36160	4.67491
HORVU1Hr1G055900	23.1208		AT1G36280	1.68246
HORVU1Hr1G055920	1.36989		AT1G36310	12.1499
HORVU1Hr1G055930	8.30597		AT1G36320	52.0043
HORVU1Hr1G055960	19.4938		AT1G36370	6.08727
HORVU1Hr1G055970	9.08216		AT1G36380	7.28011
HORVU1Hr1G056000	5.14488		AT1G36390	1.80162
HORVU1Hr1G056010	1.74746		AT1G36730	111.313
HORVU1Hr1G056020	56.8961		AT1G36980	38.3195
HORVU1Hr1G056070	5.85457		AT1G36990	5.78937
HORVU1Hr1G056110	54.0669		AT1G37150	5.03289
HORVU1Hr1G056160	55.0879		AT1G41830	3.47481
HORVU1Hr1G056170	1.37825		AT1G41880	96.7489
HORVU1Hr1G056190	3.61417		AT1G42430	2.52663
HORVU1Hr1G056210	6.81576		AT1G42440	8.62588
HORVU1Hr1G056220	14.0155		AT1G42470	5.09619
HORVU1Hr1G056260	7.06081		AT1G42540	1.40283
HORVU1Hr1G056280	2.54263		AT1G42550	1.1414
HORVU1Hr1G056340	4.05553		AT1G42960	17.02
HORVU1Hr1G056380	40.9167		AT1G42970	3.04434
HORVU1Hr1G056430	3.92997		AT1G42990	30.7202
HORVU1Hr1G056450	19.0812		AT1G43130	33.2883
HORVU1Hr1G056470	13.3918		AT1G43160	8.07273
HORVU1Hr1G056490	112.417		AT1G43170	98.5555
HORVU1Hr1G056500	8.54737		AT1G43190	6.11436
HORVU1Hr1G056510	10.5594		AT1G43245	7.00004
HORVU1Hr1G056560	6.38036		AT1G43560	3.39127
HORVU1Hr1G056570	170.86		AT1G43580	3.95707
HORVU1Hr1G056610	4.85599		AT1G43620	4.28328
HORVU1Hr1G056630	4.85599		AT1G43650	3.94813
HORVU1Hr1G056760	4.11943		AT1G43670	130.926
HORVU1Hr1G056770	19.3301		AT1G43690	6.04479
HORVU1Hr1G056870	6.77538		AT1G43700	65.1916
HORVU1Hr1G057140	13.0164		AT1G43710	52.4546
HORVU1Hr1G057150	2.0808		AT1G43770	2.35796
HORVU1Hr1G057240	7.01609		AT1G43850	7.20152
HORVU1Hr1G057270	50.2358		AT1G43860	13.1481
HORVU1Hr1G057290	5.7607		AT1G43890	237.258
HORVU1Hr1G057300	3.01987		AT1G43900	6.77755
HORVU1Hr1G057330	39.9468		AT1G44100	4.13029
HORVU1Hr1G057360	48.7522		AT1G44170	4.29059
HORVU1Hr1G057410	3.07786		AT1G44350	7.16408
HORVU1Hr1G057450	1.59085		AT1G44414	14.923
HORVU1Hr1G057490	7.88826		AT1G44446	12.5338
HORVU1Hr1G057510	15.6008		AT1G44575	3.5525
HORVU1Hr1G057520	10.7276		AT1G44750	3.96725
HORVU1Hr1G057530	101.777		AT1G44770	40.5874
HORVU1Hr1G057570	108.228		AT1G44810	63.0288
HORVU1Hr1G057630	11.3582		AT1G44820	7.34973
HORVU1Hr1G057660	37.2307		AT1G44835	2.02119
HORVU1Hr1G057680	7.74374		AT1G44890	2.20073
HORVU1Hr1G057800	7.13039		AT1G44910	3.82188
HORVU1Hr1G057880	284.391		AT1G44920	2.12073
HORVU1Hr1G057900	10.663		AT1G44960	15.135
HORVU1Hr1G057940	31.095		AT1G45000	35.651
HORVU1Hr1G057950	85.5375		AT1G45050	6.45615
HORVU1Hr1G057960	12.4018		AT1G45110	3.2574
HORVU1Hr1G057970	561.742		AT1G45145	669.696
HORVU1Hr1G058000	1.63245		AT1G45150	18.0498
HORVU1Hr1G058020	3.09308		AT1G45160	3.14029
HORVU1Hr1G058040	5.92986		AT1G45163	3.26408
HORVU1Hr1G058080	67.3084		AT1G45165	2.5833
HORVU1Hr1G058090	4.86857		AT1G45170	5.81736
HORVU1Hr1G058100	20.6919		AT1G45230	42.644
HORVU1Hr1G058140	14.1389		AT1G45231	3.09966
HORVU1Hr1G058170	73.7632		AT1G45233	5.14805
HORVU1Hr1G058180	108.569		AT1G45248	2.42596
HORVU1Hr1G058250	3.21975		AT1G45332	5.60304
HORVU1Hr1G058330	12.2301		AT1G45474	8.42467
HORVU1Hr1G058340	43.4382		AT1G45976	69.1222
HORVU1Hr1G058400	4.33647		AT1G46768	103.918
HORVU1Hr1G058420	1.98296		AT1G47056	20.8752
HORVU1Hr1G058440	3.48685		AT1G47128	16.0694
HORVU1Hr1G058480	70.6887		AT1G47200	18.4672
HORVU1Hr1G058500	9.24455		AT1G47230	3.03135
HORVU1Hr1G058520	109.817		AT1G47240	5.05442
HORVU1Hr1G058540	27.5383		AT1G47250	18.5376
HORVU1Hr1G058580	29.6543		AT1G47260	23.7202
HORVU1Hr1G058600	5.24301		AT1G47270	20.8187
HORVU1Hr1G058640	5.49115		AT1G47278	35.9879
HORVU1Hr1G058700	22.7155		AT1G47280	3.76208
HORVU1Hr1G058750	13.751		AT1G47310	22.0347
HORVU1Hr1G058770	79.5762		AT1G47330	4.68613
HORVU1Hr1G058790	20.3655		AT1G47340	5.8956
HORVU1Hr1G058810	77.4202		AT1G47380	1.65109
HORVU1Hr1G058820	5.821		AT1G47420	58.2309
HORVU1Hr1G058860	41.5968		AT1G47490	15.035
HORVU1Hr1G058880	24.8536		AT1G47500	16.6056
HORVU1Hr1G059050	6.25407		AT1G47530	32.1484
HORVU1Hr1G059090	4.86393		AT1G47540	7173.77
HORVU1Hr1G059130	2.30217		AT1G47550	10.4399
HORVU1Hr1G059150	5.74573		AT1G47570	5.59877
HORVU1Hr1G059180	1.45632		AT1G47640	5.69826
HORVU1Hr1G059220	10.109		AT1G47710	33.4595
HORVU1Hr1G059300	6.2211		AT1G47720	3.77839
HORVU1Hr1G059310	59.0012		AT1G47740	1.4635
HORVU1Hr1G059350	56.1161		AT1G47750	5.25811
HORVU1Hr1G059360	3.62936		AT1G47820	10.1271
HORVU1Hr1G059400	1.838		AT1G47830	31.4438
HORVU1Hr1G059450	24.5937		AT1G47870	3.97496
HORVU1Hr1G059490	3.61458		AT1G47960	2.69917
HORVU1Hr1G059510	22.4691		AT1G47970	46.7796
HORVU1Hr1G059570	827.795		AT1G47980	209.954
HORVU1Hr1G059630	5.0733		AT1G48020	6.04923
HORVU1Hr1G059720	25.9508		AT1G48030	17.4518
HORVU1Hr1G059760	25.9508		AT1G48040	1.91508
HORVU1Hr1G059780	4.33644		AT1G48050	2.25525
HORVU1Hr1G059810	10.976		AT1G48090	2.00533
HORVU1Hr1G059860	112.526		AT1G48110	4.60146
HORVU1Hr1G059870	2617.97		AT1G48120	1.29423
HORVU1Hr1G059890	13.1179		AT1G48130	8453
HORVU1Hr1G059900	5408.75		AT1G48140	8.65967
HORVU1Hr1G059910	276.645		AT1G48160	26.2281
HORVU1Hr1G059920	220.329		AT1G48170	10.3128
HORVU1Hr1G059950	126.537		AT1G48175	4.85532
HORVU1Hr1G059960	172.931		AT1G48200	6.7809
HORVU1Hr1G059970	394.216		AT1G48210	4.0761
HORVU1Hr1G059990	4.33506		AT1G48240	5.00196
HORVU1Hr1G060010	9.5732		AT1G48300	44.3061
HORVU1Hr1G060060	1.62126		AT1G48310	2.6143
HORVU1Hr1G060090	40.2858		AT1G48320	1.33109
HORVU1Hr1G060140	50.1259		AT1G48350	32.695
HORVU1Hr1G060150	60.0973		AT1G48370	2.41907
HORVU1Hr1G060170	6.43361		AT1G48380	11.8498
HORVU1Hr1G060180	35.5695		AT1G48405	2.08831
HORVU1Hr1G060350	98.2352		AT1G48410	10.137
HORVU1Hr1G060380	17.792		AT1G48420	11.9423
HORVU1Hr1G060390	2.58961		AT1G48430	5.43485
HORVU1Hr1G060420	16.3106		AT1G48440	34.1652
HORVU1Hr1G060480	4.65471		AT1G48450	32.9428
HORVU1Hr1G060490	184.707		AT1G48460	24.276
HORVU1Hr1G060550	14.9705		AT1G48470	110.434
HORVU1Hr1G060610	4.90713		AT1G48490	3.1353
HORVU1Hr1G060740	3.75011		AT1G48500	5.06323
HORVU1Hr1G060770	22.1106		AT1G48520	4.06986
HORVU1Hr1G060810	29.5712		AT1G48530	4.95627
HORVU1Hr1G060850	12.6233		AT1G48540	3.63558
HORVU1Hr1G060880	135.51		AT1G48550	20.8733
HORVU1Hr1G060970	6.66009		AT1G48560	5.71218
HORVU1Hr1G060980	9.58745		AT1G48570	11.2091
HORVU1Hr1G061010	11.6072		AT1G48580	1.54627
HORVU1Hr1G061020	4.50729		AT1G48610	1.74554
HORVU1Hr1G061160	2.8508		AT1G48620	27.9988
HORVU1Hr1G061190	52.353		AT1G48630	13.5895
HORVU1Hr1G061200	27.6021		AT1G48635	19.9178
HORVU1Hr1G061210	3.52127		AT1G48650	3.92746
HORVU1Hr1G061230	2.2183		AT1G48660	5.48471
HORVU1Hr1G061360	7.00326		AT1G48745	4.58166
HORVU1Hr1G061420	32.0457		AT1G48750	377.309
HORVU1Hr1G061430	6.14587		AT1G48760	3.18345
HORVU1Hr1G061500	249.616		AT1G48790	7.27488
HORVU1Hr1G061530	33.1439		AT1G48830	148.475
HORVU1Hr1G061550	48.9449		AT1G48840	32.5471
HORVU1Hr1G061580	3.5321		AT1G48850	18.7945
HORVU1Hr1G061600	1.45258		AT1G48860	5.9815
HORVU1Hr1G061630	12.2744		AT1G48900	8.82391
HORVU1Hr1G061690	29.2276		AT1G48920	142.681
HORVU1Hr1G061710	3.30138		AT1G48950	7.21664
HORVU1Hr1G061780	12.2385		AT1G48960	2.67687
HORVU1Hr1G061790	5.97232		AT1G48970	3.59694
HORVU1Hr1G061810	81.0192		AT1G48990	111.903
HORVU1Hr1G061820	19.3124		AT1G49032	19.9376
HORVU1Hr1G061880	3.06148		AT1G49140	23.8235
HORVU1Hr1G061950	4.18915		AT1G49170	32.0857
HORVU1Hr1G061960	258.664		AT1G49180	1.62074
HORVU1Hr1G062080	45.5522		AT1G49240	30.5009
HORVU1Hr1G062100	1.55414		AT1G49245	18.7158
HORVU1Hr1G062110	28.582		AT1G49300	79.5504
HORVU1Hr1G062130	1.34938		AT1G49350	9.43868
HORVU1Hr1G062160	36.4116		AT1G49390	21.2354
HORVU1Hr1G062170	12.1993		AT1G49400	8.48807
HORVU1Hr1G062190	4.99139		AT1G49475	12.9961
HORVU1Hr1G062210	6.36522		AT1G49480	8.84479
HORVU1Hr1G062270	3.21718		AT1G49510	3.19852
HORVU1Hr1G062340	4.17492		AT1G49520	1.78124
HORVU1Hr1G062420	8.47323		AT1G49540	6.30216
HORVU1Hr1G062450	10.9833		AT1G49560	5.17128
HORVU1Hr1G062460	35.0202		AT1G49590	9.99289
HORVU1Hr1G062470	32.9691		AT1G49600	14.4137
HORVU1Hr1G062480	24.3164		AT1G49620	9.97002
HORVU1Hr1G062500	8.63565		AT1G49650	26.8484
HORVU1Hr1G062510	124.165		AT1G49660	14.5492
HORVU1Hr1G062530	4.3071		AT1G49670	5.79518
HORVU1Hr1G062580	49.111		AT1G49700	17.1667
HORVU1Hr1G062620	23.1441		AT1G49710	3.05086
HORVU1Hr1G062650	127.899		AT1G49720	1.96596
HORVU1Hr1G062690	7.24782		AT1G49740	4.91405
HORVU1Hr1G062740	12.831		AT1G49760	12.4698
HORVU1Hr1G062770	3.75273		AT1G49780	4.10284
HORVU1Hr1G062810	36.9803		AT1G49820	8.82161
HORVU1Hr1G062820	2.15028		AT1G49850	14.5492
HORVU1Hr1G062900	141.12		AT1G49880	14.5998
HORVU1Hr1G062940	30.6861		AT1G49890	1.48599
HORVU1Hr1G062980	31.5992		AT1G49950	29.9016
HORVU1Hr1G063010	8.72848		AT1G49970	56.6728
HORVU1Hr1G063030	10.8145		AT1G49980	3.52606
HORVU1Hr1G063050	2.64587		AT1G50000	6.13532
HORVU1Hr1G063090	13.4279		AT1G50010	6.74523
HORVU1Hr1G063100	90.778		AT1G50020	65.9783
HORVU1Hr1G063150	4.78429		AT1G50030	3.18664
HORVU1Hr1G063200	2.39831		AT1G50120	1.38064
HORVU1Hr1G063220	12.8088		AT1G50140	3.2688
HORVU1Hr1G063300	18.7111		AT1G50170	18.1092
HORVU1Hr1G063310	58.8225		AT1G50200	15.2443
HORVU1Hr1G063320	36.0419		AT1G50250	6.04001
HORVU1Hr1G063390	70.3638		AT1G50260	10.6372
HORVU1Hr1G063410	3.81733		AT1G50290	13.5199
HORVU1Hr1G063510	1.81282		AT1G50300	4.84231
HORVU1Hr1G063590	275.441		AT1G50320	9.03808
HORVU1Hr1G063630	6.09176		AT1G50370	12.1554
HORVU1Hr1G063640	17.6101		AT1G50380	24.2305
HORVU1Hr1G063700	5.92875		AT1G50400	5.07962
HORVU1Hr1G063720	2.71599		AT1G50410	1.90986
HORVU1Hr1G063740	17.6725		AT1G50420	15.1055
HORVU1Hr1G063890	6.4215		AT1G50440	4.08211
HORVU1Hr1G063930	14.5389		AT1G50450	8.4593
HORVU1Hr1G063940	340.269		AT1G50460	6.37414
HORVU1Hr1G064020	10.5445		AT1G50480	18.7371
HORVU1Hr1G064040	19.1199		AT1G50490	1.91206
HORVU1Hr1G064070	2.67302		AT1G50500	3.21548
HORVU1Hr1G064160	41.5725		AT1G50510	14.7689
HORVU1Hr1G064190	36.8395		AT1G50520	2.56083
HORVU1Hr1G064210	174.544		AT1G50570	18.1861
HORVU1Hr1G064240	81.6521		AT1G50600	29.6593
HORVU1Hr1G064250	116.557		AT1G50620	1.81418
HORVU1Hr1G064440	12.1092		AT1G50640	13.7385
HORVU1Hr1G064460	4.45366		AT1G50660	4.64813
HORVU1Hr1G064470	2.20269		AT1G50670	13.9441
HORVU1Hr1G064480	70.8703		AT1G50730	2.11435
HORVU1Hr1G064490	114.646		AT1G50740	8.89687
HORVU1Hr1G064560	3.29446		AT1G50840	4.68678
HORVU1Hr1G064600	11.6392		AT1G50900	2.97489
HORVU1Hr1G064630	20.455		AT1G50910	2.17812
HORVU1Hr1G064700	2.46564		AT1G50920	41.7033
HORVU1Hr1G064750	6.74223		AT1G50940	1.94362
HORVU1Hr1G064770	1.14886		AT1G50970	1.20093
HORVU1Hr1G064780	8.54273		AT1G51035	3.98528
HORVU1Hr1G064830	47.1705		AT1G51060	48.8471
HORVU1Hr1G064860	13.442		AT1G51090	46.0106
HORVU1Hr1G064870	20.4077		AT1G51100	3.20949
HORVU1Hr1G064890	4.10643		AT1G51130	8.13721
HORVU1Hr1G064930	1.97619		AT1G51140	15.9543
HORVU1Hr1G065000	19.7459		AT1G51160	8.00703
HORVU1Hr1G065020	2.73229		AT1G51200	607.935
HORVU1Hr1G065030	72.0264		AT1G51250	3.26074
HORVU1Hr1G065040	1.84857		AT1G51310	7.93764
HORVU1Hr1G065070	13.6345		AT1G51350	2.47177
HORVU1Hr1G065100	15.8606		AT1G51355	3.7536
HORVU1Hr1G065150	5.32084		AT1G51360	8.71072
HORVU1Hr1G065190	31.0122		AT1G51370	3.31428
HORVU1Hr1G065270	1.62241		AT1G51380	3.74722
HORVU1Hr1G065320	2.16053		AT1G51390	3.51382
HORVU1Hr1G065390	25.2474		AT1G51400	8.16297
HORVU1Hr1G065440	23.6672		AT1G51430	11.1532
HORVU1Hr1G065470	9.98034		AT1G51450	3.43926
HORVU1Hr1G065550	4.96861		AT1G51500	1.90802
HORVU1Hr1G065560	3.0413		AT1G51510	65.0369
HORVU1Hr1G065570	35.3914		AT1G51520	2.67956
HORVU1Hr1G065630	5.9764		AT1G51540	1.42017
HORVU1Hr1G065650	6.49806		AT1G51550	1.99236
HORVU1Hr1G065660	16.6273		AT1G51560	7.85901
HORVU1Hr1G065690	3.64115		AT1G51580	2.00815
HORVU1Hr1G065770	20.5266		AT1G51590	7.4456
HORVU1Hr1G065810	75.2426		AT1G51600	18.5579
HORVU1Hr1G065820	11.784		AT1G51610	2.36736
HORVU1Hr1G065830	17.1876		AT1G51630	6.15532
HORVU1Hr1G065910	2.03009		AT1G51650	351.309
HORVU1Hr1G065950	2.04348		AT1G51660	1.37551
HORVU1Hr1G065960	11.2701		AT1G51680	1.5632
HORVU1Hr1G066020	3.84327		AT1G51690	6.86215
HORVU1Hr1G066030	38.0576		AT1G51700	7.29014
HORVU1Hr1G066050	1.71639		AT1G51710	46.4696
HORVU1Hr1G066060	32.1601		AT1G51720	8.51081
HORVU1Hr1G066100	14.8267		AT1G51730	29.3076
HORVU1Hr1G066130	7.67893		AT1G51740	9.67137
HORVU1Hr1G066240	1.96835		AT1G51745	2.56529
HORVU1Hr1G066280	7.78642		AT1G51760	7.97046
HORVU1Hr1G066300	11.2247		AT1G51965	1.58717
HORVU1Hr1G066460	15.02		AT1G51980	46.2949
HORVU1Hr1G066520	12.516		AT1G52080	3.68125
HORVU1Hr1G066630	659.725		AT1G52160	1.61069
HORVU1Hr1G066640	4.35217		AT1G52245	12.0735
HORVU1Hr1G066760	2.47939		AT1G52260	2.55802
HORVU1Hr1G066770	8.28043		AT1G52300	154.806
HORVU1Hr1G066980	13.6632		AT1G52310	1.87528
HORVU1Hr1G067000	7.98247		AT1G52320	6.57898
HORVU1Hr1G067020	5.56993		AT1G52340	1.73564
HORVU1Hr1G067060	7.84063		AT1G52342	84.3602
HORVU1Hr1G067100	15.5962		AT1G52360	9.79503
HORVU1Hr1G067110	7.83939		AT1G52370	12.966
HORVU1Hr1G067200	40.9187		AT1G52380	23.9076
HORVU1Hr1G067240	3.17299		AT1G52420	2.8797
HORVU1Hr1G067290	58.5728		AT1G52500	3.95633
HORVU1Hr1G067300	27.783		AT1G52510	7.31564
HORVU1Hr1G067320	2.60758		AT1G52520	6.09204
HORVU1Hr1G067370	414.498		AT1G52540	1.78888
HORVU1Hr1G067460	1.8829		AT1G52560	181.727
HORVU1Hr1G067480	8.44417		AT1G52565	2.27372
HORVU1Hr1G067490	3.54294		AT1G52590	5.95632
HORVU1Hr1G067520	4.16059		AT1G52600	27.2286
HORVU1Hr1G067670	13.9547		AT1G52630	1.46111
HORVU1Hr1G067810	4.45752		AT1G52650	1.21791
HORVU1Hr1G067870	38.3473		AT1G52690	2790.32
HORVU1Hr1G067910	23.3414		AT1G52710	15.6216
HORVU1Hr1G067960	27.9664		AT1G52720	9.609
HORVU1Hr1G067980	273.451		AT1G52730	7.20699
HORVU1Hr1G067990	37.1709		AT1G52740	282.091
HORVU1Hr1G068010	2.57423		AT1G52760	6.58953
HORVU1Hr1G068020	4.14709		AT1G52827	2.73822
HORVU1Hr1G068030	7.61462		AT1G52855	6.83697
HORVU1Hr1G068130	3.42577		AT1G52870	26.6643
HORVU1Hr1G068160	1.89603		AT1G52890	10.5378
HORVU1Hr1G068170	190.503		AT1G52920	24.0487
HORVU1Hr1G068220	3.02752		AT1G52930	37.45
HORVU1Hr1G068320	21.1889		AT1G52980	35.6807
HORVU1Hr1G068420	35.3683		AT1G53000	30.7777
HORVU1Hr1G068430	22.7993		AT1G53025	1.48008
HORVU1Hr1G068490	47.8826		AT1G53030	61.1043
HORVU1Hr1G068520	4.35728		AT1G53050	2.15811
HORVU1Hr1G068530	2.21552		AT1G53090	1.5819
HORVU1Hr1G068540	9.29745		AT1G53110	1.47909
HORVU1Hr1G068640	1653.4		AT1G53120	12.0787
HORVU1Hr1G068650	1.92714		AT1G53165	2.65194
HORVU1Hr1G068660	11.4723		AT1G53170	1.54229
HORVU1Hr1G068750	10.4415		AT1G53190	5.30216
HORVU1Hr1G068770	1.5331		AT1G53200	5.52259
HORVU1Hr1G068790	11.4911		AT1G53210	29.8509
HORVU1Hr1G068830	1.9664		AT1G53240	16.8373
HORVU1Hr1G068850	2.75021		AT1G53280	11.8863
HORVU1Hr1G068860	5.83822		AT1G53310	11.9284
HORVU1Hr1G068870	6.68041		AT1G53320	48.2431
HORVU1Hr1G068940	3.79688		AT1G53380	6.93116
HORVU1Hr1G068950	15.6797		AT1G53400	43.2124
HORVU1Hr1G069060	21.9279		AT1G53450	3.57039
HORVU1Hr1G069080	124.484		AT1G53460	8.55171
HORVU1Hr1G069100	1.26374		AT1G53480	6.68939
HORVU1Hr1G069210	40.0622		AT1G53490	3.57077
HORVU1Hr1G069250	17.1105		AT1G53510	2.45561
HORVU1Hr1G069310	1.40795		AT1G53530	12.4633
HORVU1Hr1G069340	58.181		AT1G53540	103.184
HORVU1Hr1G069360	150.748		AT1G53560	6.04576
HORVU1Hr1G069380	39.7421		AT1G53570	4.47853
HORVU1Hr1G069400	1.39871		AT1G53580	3.08032
HORVU1Hr1G069420	4.48974		AT1G53590	3.78363
HORVU1Hr1G069440	4.1748		AT1G53645	5.65031
HORVU1Hr1G069500	5.05837		AT1G53670	19.845
HORVU1Hr1G069530	25.4434		AT1G53680	2.47811
HORVU1Hr1G069650	15.7483		AT1G53710	1.27785
HORVU1Hr1G069830	19.921		AT1G53720	4.7607
HORVU1Hr1G069840	1.96295		AT1G53730	1.47069
HORVU1Hr1G070040	1.82204		AT1G53750	139.916
HORVU1Hr1G070110	6.1009		AT1G53760	51.6144
HORVU1Hr1G070120	25.0742		AT1G53770	2.245
HORVU1Hr1G070200	2.13458		AT1G53780	22.4715
HORVU1Hr1G070220	18.037		AT1G53790	7.74354
HORVU1Hr1G070230	29.4109		AT1G53800	3.52494
HORVU1Hr1G070270	11.6872		AT1G53830	1.49867
HORVU1Hr1G070290	2.13458		AT1G53850	57.7124
HORVU1Hr1G070310	1109.95		AT1G53880	2.80971
HORVU1Hr1G070330	10.2966		AT1G53910	115.49
HORVU1Hr1G070360	19.635		AT1G54010	7.7041
HORVU1Hr1G070410	1.5963		AT1G54030	13.6567
HORVU1Hr1G070430	3.44082		AT1G54050	122.284
HORVU1Hr1G070440	12.0167		AT1G54060	13.203
HORVU1Hr1G070460	1.64303		AT1G54070	2.92745
HORVU1Hr1G070610	44.355		AT1G54080	21.6213
HORVU1Hr1G070620	24.028		AT1G54090	2.47959
HORVU1Hr1G070670	4.21719		AT1G54100	151.701
HORVU1Hr1G070690	476.638		AT1G54110	8.20758
HORVU1Hr1G070740	2.48472		AT1G54115	4.53159
HORVU1Hr1G070840	4.40679		AT1G54120	2.19701
HORVU1Hr1G070920	44.6104		AT1G54130	28.5968
HORVU1Hr1G071060	28.4856		AT1G54140	10.0968
HORVU1Hr1G071160	4.24046		AT1G54150	4.01088
HORVU1Hr1G071180	22.0998		AT1G54170	8.2045
HORVU1Hr1G071220	84.1934		AT1G54210	25.1161
HORVU1Hr1G071260	1.81408		AT1G54217	11.4782
[truncated: 13,725 more rows]

## Sheet: ST2A
Supplemental Table 2A. List of differentially expressed barley genes as represented in Figure 2. Given are log2 of fold changes compared to the 0 h time point. Ord. column indicates order show on heatmap.
Ord.	HORVU	OG_cluster 8	type	annotation	logFC_3h	logFC_6h	logFC_12h	logFC_24h	logFC_36h	logFC_48h
1	HORVU0Hr1G031390	-	x	x	0	-7.80916	-7.18884	-7.7911	-7.9416	-9.49554
2	HORVU1Hr1G025100	-	HC_G	NADH-quinone oxidoreductase subunit C	0	-6.98141	-6.10729	-6.31447	-8.20735	-9.79289
3	HORVU4Hr1G002800	-	HC_G	Globulin-2	0	-3.48267	-8.27709	-10.202	-11.8255	-12.6061
4	HORVU1Hr1G052180	-	HC_G	Metallothionein-like protein 4B	0	-3.22837	-7.57446	-9.77903	-11.5494	-12.1263
5	HORVU3Hr1G028990	-	HC_G	Late embryogenesis abundant protein B19.4	0	-3.78846	-8.11115	-10.1645	-11.0859	-11.0928
6	HORVU4Hr1G017260	-	HC_U	unknown protein; Has 25 Blast hits to 25 proteins in 9 species: Archae - 0; Bacteria - 0; Metazoa - 0; Fungi - 0; Plants - 25; Viruses - 0; Other Eukaryotes - 0 (source: NCBI BLink).	0	-4.02634	-7.5479	-9.43949	-10.3717	-11.7456
7	HORVU5Hr1G083330	-	HC_G	Defensin-like protein 1	0	-2.81198	-7.15566	-8.94198	-9.27023	-11.6553
8	HORVU1Hr1G063100	-	HC_G	Ethylene-responsive transcription factor 1	0	-4.1137	-8.28971	-11.0843	-10.3549	-10.5253
9	HORVU1Hr1G009140	-	HC_U	unknown function	0	-4.43207	-9.23373	-11.1841	-9.63629	-9.02356
10	HORVU4Hr1G073120	-	HC_G	Late embryogenesis abundant protein D-34	0	-3.81233	-8.12525	-9.8821	-10.7302	-9.32532
11	HORVU5Hr1G000400	-	HC_u	undescribed protein	0	-4.59806	-7.58136	-9.78813	-9.61179	-10.2857
12	HORVU2Hr1G018670	-	HC_U	unknown function	0	-4.10972	-8.33731	-9.549	-9.98012	-9.67212
13	HORVU1Hr1G082820	-	HC_U	unknown function	0	-3.73488	-8.19788	-9.98339	-9.61167	-10.1715
14	HORVU5Hr1G005930	-	HC_G	Late embryogenesis abundant protein D-34	0	-3.79431	-8.22334	-9.74306	-9.33535	-9.74306
15	HORVU1Hr1G059920	-	HC_G	Late embryogenesis abundant protein D-19	0	-4.21603	-6.74933	-9.91788	-10.4035	-9.16943
16	HORVU3Hr1G030650	-	HC_G	Late embryogenesis abundant protein	0	-4.22909	-7.34605	-10.1573	-9.64326	-9.25151
17	HORVU6Hr1G005030	-	HC_G	P-loop NTPase domain-containing protein LPA1	0	-3.95828	-7.82442	-10.0836	-9.3999	-9.10098
18	HORVU6Hr1G083980	-	HC_G	Dehydrin DHN4	0	-3.53399	-7.7161	-10.5979	-9.26893	-8.42996
19	HORVU1Hr1G043890	-	HC_G	Aquaporin-like superfamily protein	0	-3.1681	-7.37157	-9.79534	-10.6005	-10.8317
20	HORVU3Hr1G075690	-	HC_G	homocysteine methyltransferase 2	0	-3.71722	-7.23619	-9.79105	-10.1494	-10.4384
21	HORVU4Hr1G000750	-	HC_G	Histone H2B	0	-3.10787	-6.947	-9.30283	-10.6472	-10.0871
22	HORVU6Hr1G071860	-	HC_G	Ethylene receptor 4	0	-2.95317	-7.1509	-10.1451	-10.063	-9.63063
23	HORVU5Hr1G056030	-	HC_G	oleosin 1	0	-2.97664	-7.30462	-8.37891	-9.43791	-10.0588
24	HORVU5Hr1G104630	-	HC_G	Vicilin	0	-3.37824	-7.10783	-7.35833	-10.8187	-10.1803
25	HORVU5Hr1G111350	-	HC_G	Vicilin-like antimicrobial peptides 2-2	0	-3.08717	-6.92132	-7.12878	-9.81223	-9.77351
26	HORVU1Hr1G059900	-	HC_G	Late embryogenesis abundant protein D-19	0	-2.75611	-5.54136	-9.1613	-10.537	-10.6282
27	HORVU5Hr1G058190	-	HC_G	Succinate dehydrogenase [ubiquinone] iron-sulfur subunit 2; mitochondrial	0	-2.51986	-5.63282	-9.05846	-10.3884	-10.9614
28	HORVU2Hr1G023370	-	HC_G	Lactoylglutathione lyase / glyoxalase I family protein	0	-2.16645	-5.12945	-9.09421	-10.3533	-10.5422
29	HORVU1Hr1G087130	-	HC_G	Cytochrome P450 superfamily protein	0	-3.18975	-5.54204	-8.24162	-10.3666	-10.3821
30	HORVU4Hr1G082680	-	HC_G	Auxin efflux carrier family protein	0	-2.51249	-5.0041	-8.30947	-9.60445	-10.0031
31	HORVU2Hr1G046600	-	HC_G	Protein phosphatase 2C family protein	0	-2.8696	-6.28452	-9.09366	-9.66624	-10.5919
32	HORVU2Hr1G088560	-	HC_G	Caleosin-related family protein	0	-3.25752	-6.0633	-9.33619	-10.1742	-9.50592
33	HORVU1Hr1G018140	-	HC_G	Dehydrogenase/reductase SDR family member 4	0	-2.76939	-6.39501	-9.42554	-10.0184	-9.64962
34	HORVU5Hr1G120110	-	HC_G	Dehydrogenase/reductase SDR family protein 7-like	0	-2.08491	-6.16305	-9.06986	-9.38503	-9.14191
35	HORVU1Hr1G059950	-	HC_G	Late embryogenesis abundant protein D-19	0	-3.7803	-6.52582	-9.122	-9.58711	-9.59231
36	HORVU1Hr1G059910	-	HC_G	Late embryogenesis abundant protein D-19	0	-3.55044	-6.23484	-8.59649	-9.56179	-9.2207
37	HORVU1Hr1G012710	-	HC_G	Low temperature-induced protein lt101.2	0	-3.56435	-6.22573	-9.11529	-9.15567	-9.15363
38	HORVU2Hr1G070360	-	HC_G	hydroxysteroid dehydrogenase 1	0	-3.14083	-5.94362	-9.27907	-9.2042	-8.77921
39	HORVU4Hr1G060670	-	HC_G	WD-40 repeat family protein	0	-3.67267	-5.18779	-8.47862	-9.42625	-9.42136
40	HORVU4Hr1G052450	-	HC_G	Hexosyltransferase	0	-3.06559	-5.66064	-8.58098	-9.63156	-8.94273
41	HORVU4Hr1G060760	-	HC_G	17.9 kDa class I heat shock protein	0	-2.62636	-6.14191	-8.83775	-8.82491	-9.76492
42	HORVU4Hr1G017350	-	HC_G	Heavy metal transport/detoxification superfamily protein	0	-3.03465	-5.76847	-8.32078	-8.87235	-10.1676
43	HORVU7Hr1G036970	-	HC_u	undescribed protein	0	-3.07483	-6.1648	-7.96174	-9.08892	-9.45018
44	HORVU2Hr1G092390	-	HC_G	P-loop NTPase domain-containing protein LPA1	0	-3.26928	-5.97975	-8.19058	-8.79408	-9.14338
45	HORVU7Hr1G071230	-	HC_G	Nodulin MtN21 /EamA-like transporter family protein	-1.0577	-3.59186	-5.81627	-8.04384	-8.8482	-9.80586
46	HORVU0Hr1G030660	-	HC_G	Nodulin MtN21 /EamA-like transporter family protein	-1.0577	-3.59186	-5.81627	-8.04384	-8.8482	-9.80586
47	HORVU0Hr1G027480	-	HC_G	Nodulin MtN21 /EamA-like transporter family protein	-1.0577	-3.59186	-5.81627	-8.04384	-8.8482	-9.80586
48	HORVU1Hr1G059870	-	HC_G	Late embryogenesis abundant protein D-19	-1.02297	-3.25564	-5.47257	-8.06162	-8.54875	-9.3917
49	HORVU1Hr1G038000	-	HC_G	Cytochrome c oxidase subunit 2	-2.24563	-5.85793	-6.72878	-8.05681	-8.491	-8.55233
50	HORVU0Hr1G037700	-	HC_G	Cytochrome c oxidase subunit 2	-2.24563	-5.85793	-6.72878	-8.05681	-8.491	-8.55233
51	HORVU7Hr1G121860	-	HC_G	Chitinase family protein	-2.78977	-5.19912	-7.87032	-7.8378	-8.28403	-7.91315
52	HORVU7Hr1G020140	-	HC_G	ATP synthase subunit alpha; chloroplastic	-2.51451	-4.99714	-6.97468	-8.14056	-8.14056	-8.14056
53	HORVU3Hr1G057810	-	HC_U	unknown protein; Has 30201 Blast hits to 17322 proteins in 780 species: Archae - 12; Bacteria - 1396; Metazoa - 17338; Fungi - 3422; Plants - 5037; Viruses - 0; Other Eukaryotes - 2996 (source: NCBI BLink).	-1.83803	-5.31777	-7.84756	-8.18532	-7.7247	-7.72735
54	HORVU3Hr1G057760	-	HC_U	unknown protein; Has 30201 Blast hits to 17322 proteins in 780 species: Archae - 12; Bacteria - 1396; Metazoa - 17338; Fungi - 3422; Plants - 5037; Viruses - 0; Other Eukaryotes - 2996 (source: NCBI BLink).	-1.83803	-5.31777	-7.84756	-8.18532	-7.7247	-7.72735
55	HORVU5Hr1G034980	-	LC_u	undescribed protein	-1.49082	-4.88274	-6.73601	-7.90983	-7.90983	-7.90983
56	HORVU7Hr1G020010	-	HC_G	Cytochrome c oxidase subunit 1	-1.53665	-4.81029	-6.04021	-7.34547	-7.60056	-8.47581
57	HORVU1Hr1G037920	-	HC_G	Cytochrome c oxidase subunit 2	-2.00073	-5.54699	-6.03236	-7.87728	-7.05115	-8.26741
58	HORVU2Hr1G030740	-	LC_u	undescribed protein	-1.56759	-5.13856	-5.97204	-7.19371	-6.85476	-7.5752
59	HORVU3Hr1G005540	-	HC_G	S-type anion channel SLAH2	-1.43861	-4.85641	-5.806	-8.50372	-8.14245	-7.04024
60	HORVU5Hr1G125460	-	HC_G	AWPM-19-like family protein	0	-4.69656	-8.85755	-9.21261	-8.79093	-9.09732
61	HORVU5Hr1G094680	-	HC_G	Late embryogenesis abundant protein D-34	0	-4.11225	-8.88603	-8.76685	-9.79382	-8.8736
62	HORVU4Hr1G081390	-	HC_G	transcription activator-related	0	-3.73782	-7.78586	-8.89324	-9.70785	-8.86805
63	HORVU6Hr1G011050	-	HC_G	Dehydrin 12	-1.22652	-4.26656	-7.26069	-9.15294	-8.51274	-9.20736
64	HORVU4Hr1G066810	-	HC_G	Early light-induced protein 1; chloroplastic	-1.02395	-4.55097	-7.43695	-8.59693	-8.36866	-8.67329
65	HORVU4Hr1G066800	-	HC_G	Early light-induced protein 1; chloroplastic	-1.02395	-4.55097	-7.43695	-8.59693	-8.36866	-8.67329
66	HORVU4Hr1G066740	-	HC_G	Early light-induced protein 1; chloroplastic	-1.02395	-4.55097	-7.43695	-8.59693	-8.36866	-8.67329
67	HORVU0Hr1G008960	-	HC_G	Early light-induced protein 1; chloroplastic	-1.02395	-4.55097	-7.43695	-8.59693	-8.36866	-8.67329
68	HORVU6Hr1G073540	-	HC_U	unknown function	0	-4.63803	-7.52037	-8.70862	-9.25163	-8.24138
69	HORVU5Hr1G125450	-	HC_G	AWPM-19-like family protein	0	-5.16517	-8.01887	-9.0635	-8.07426	-8.76612
70	HORVU5Hr1G063650	-	HC_G	Early light-induced protein 1; chloroplastic	0	-5.39783	-7.45836	-8.37217	-8.37217	-8.37217
71	HORVU5Hr1G072160	-	HC_G	Late embryogenesis abundant protein group 8 protein; putative	0	-4.91714	-7.64933	-7.88202	-8.3745	-8.75683
72	HORVU7Hr1G082040	-	HC_G	Late embryogenesis abundant protein D-34	0	-3.63889	-8.41368	-9.53374	-8.41575	-8.40542
73	HORVU4Hr1G005800	-	HC_G	Oleosin Zm-II	0	-2.76103	-7.53579	-9.53394	-8.75079	-8.62704
74	HORVU7Hr1G046340	-	HC_G	Protein LE25	0	-4.47875	-7.91218	-9.12185	-8.63215	-7.27721
75	HORVU4Hr1G059270	-	HC_G	Glyoxalase family protein; expressed	0	-4.06536	-8.00158	-9.55222	-8.5074	-7.0288
76	HORVU2Hr1G075930	-	HC_G	Late embryogenesis abundant protein (LEA) family protein	0	-4.16731	-6.95321	-9.80498	-9.39033	-7.50226
77	HORVU3Hr1G069140	-	HC_U	Protein of unknown function (DUF1264)	0	-3.42941	-6.94136	-10.0407	-8.96039	-7.82362
78	HORVU7Hr1G100150	-	HC_G	undescribed protein	0	-4.15834	-7.47627	-9.68442	-8.42141	-7.93312
79	HORVU6Hr1G020080	-	HC_U	unknown protein; Has 109 Blast hits to 109 proteins in 52 species: Archae - 0; Bacteria - 4; Metazoa - 0; Fungi - 71; Plants - 32; Viruses - 0; Other Eukaryotes - 2 (source: NCBI BLink).	0	-3.39927	-7.3147	-9.72515	-8.47186	-8.13136
80	HORVU6Hr1G084070	-	HC_G	Dehydrin DHN3	0	-3.40387	-7.56092	-9.65819	-8.40608	-7.56773
81	HORVU2Hr1G019680	-	HC_G	UDP-Glycosyltransferase superfamily protein	0	-4.3227	-6.96755	-9.40972	-8.85698	-8.94748
82	HORVU3Hr1G039050	-	HC_G	Chromosome 3B; genomic scaffold; cultivar Chinese Spring	0	-3.87556	-6.72101	-9.34779	-9.09857	-8.87589
83	HORVU3Hr1G071490	-	HC_U	Protein of unknown function (DUF1264)	0	-3.26138	-6.74603	-9.45792	-8.62628	-8.40423
84	HORVU7Hr1G073790	-	HC_U	unknown protein; BEST Arabidopsis thaliana protein match is: unknown protein .	0	-3.5482	-6.63274	-8.75397	-8.38207	-8.75397
85	HORVU4Hr1G050210	-	HC_G	Vicilin-like antimicrobial peptides 2-3	0	-4.29705	-7.37321	-9.93454	-7.73549	-6.44621
86	HORVU5Hr1G014120	-	HC_u	undescribed protein	0	-4.8969	-7.81799	-8.42956	-7.42998	-8.01221
87	HORVU3Hr1G004300	-	HC_G	Bowman-Birk type trypsin inhibitor	0	-4.84063	-7.51166	-8.62696	-7.27731	-7.75802
88	HORVU2Hr1G105740	-	HC_G	undescribed protein	0	-4.04323	-7.52536	-8.70971	-7.90988	-7.76027
89	HORVU2Hr1G099870	-	HC_G	Late embryogenesis abundant protein (LEA) family protein	0	-4.11303	-6.97058	-8.83632	-8.30302	-8.08727
90	HORVU4Hr1G074750	-	HC_G	Late embryogenesis abundant protein; expressed	0	-4.15167	-6.95613	-8.876	-8.08954	-7.50705
91	HORVU5Hr1G109290	-	HC_G	Calcium-binding EF-hand family protein	0	-4.24315	-7.28398	-7.82776	-8.19779	-7.06471
92	HORVU6Hr1G025430	-	HC_G	SNF1-related protein kinase regulatory subunit gamma-like PV42a	0	-4.16303	-7.50904	-8.21021	-7.75516	-6.84106
93	HORVU7Hr1G003170	-	HC_G	LEA	0	-3.58841	-7.57037	-8.17587	-7.51002	-6.98407
94	HORVU5Hr1G125500	-	HC_G	AWPM-19-like family protein	0	-4.71347	-7.12657	-8.72269	-7.50584	-6.36006
95	HORVU4Hr1G051780	-	HC_G	Late embryogenesis abundant protein 1	0	-4.26772	-6.96554	-8.35894	-7.76639	-6.1553
96	HORVU7Hr1G053880	-	LC_TE?	unknown function	0	-4.41583	-7.4837	-7.82308	-7.57721	-6.23844
97	HORVU1Hr1G070310	-	HC_G	Aldose reductase	0	-3.67526	-6.66024	-9.81603	-8.27218	-7.00209
98	HORVU4Hr1G008990	-	HC_G	Late embryogenesis abundant protein	0	-3.33243	-6.67694	-9.29223	-8.60446	-7.46446
99	HORVU5Hr1G010330	-	HC_G	Outer envelope pore protein 16-2; chloroplastic	0	-3.0465	-5.98276	-8.9862	-8.71699	-6.96649
100	HORVU2Hr1G026810	-	HC_G	Peroxiredoxin-6	0	-3.776	-6.65	-8.96221	-7.99666	-6.63298
101	HORVU4Hr1G059280	-	HC_G	Seed maturation protein PM41	0	-3.04873	-6.87382	-8.64273	-8.18762	-7.15065
102	HORVU1Hr1G070690	-	HC_G	PEBP (phosphatidylethanolamine-binding protein) family protein	0	-3.11961	-6.4966	-8.49449	-7.76236	-7.2479
103	HORVU2Hr1G026760	-	LC_u	undescribed protein	0	-4.12053	-5.9479	-7.94773	-8.24603	-7.2146
104	HORVU7Hr1G048100	-	HC_G	undescribed protein	0	-3.37524	-7.49514	-8.12622	-8.91888	-8.54772
105	HORVU2Hr1G035870	-	HC_TE?	Zinc finger protein Sdr4	0	-3.79535	-7.42554	-7.73707	-9.02128	-8.42464
106	HORVU1Hr1G091010	-	HC_G	Oleosin family protein	0	-3.14073	-7.89032	-7.94454	-8.17097	-8.0285
107	HORVU5Hr1G005910	-	HC_G	Late embryogenesis abundant protein D-34	0	-2.63744	-7.30679	-8.6093	-9.00993	-8.5272
108	HORVU4Hr1G000760	-	LC_u	undescribed protein	0	-2.49495	-6.94359	-8.06271	-9.05959	-8.29768
109	HORVU2Hr1G121090	-	HC_G	Cytochrome P450 superfamily protein	0	-3.42783	-6.55547	-8.11057	-8.08679	-9.49633
110	HORVU5Hr1G083320	-	HC_G	Defensin	0	-2.78948	-6.79291	-7.96547	-7.81483	-9.77466
111	HORVU7Hr1G077860	-	HC_G	Seed maturation protein	0	-2.23507	-7.48984	-7.08166	-7.42822	-9.1264
112	HORVU3Hr1G016280	-	HC_G	Cytochrome c oxidase subunit Vc family protein	0	-3.33844	-7.20737	-8.56331	-8.00477	-8.19215
113	HORVU5Hr1G069360	-	HC_U	Protein of unknown function (DUF1264)	0	-3.0315	-6.7351	-8.13562	-8.06548	-8.10932
114	HORVU3Hr1G057690	-	HC_G	Protein CHUP1; chloroplastic	0	-2.65508	-6.53787	-8.14777	-8.11429	-8.49233
115	HORVU6Hr1G009000	-	HC_G	Heavy metal transport/detoxification superfamily protein	0	-3.4628	-6.44204	-7.73289	-7.34181	-8.2746
116	HORVU5Hr1G105900	-	HC_G	WW domain-binding protein 11	0	-3.06533	-6.81676	-7.8842	-7.22579	-7.9786
117	HORVU5Hr1G050950	-	HC_U	unknown protein; Has 42 Blast hits to 42 proteins in 10 species: Archae - 0; Bacteria - 0; Metazoa - 0; Fungi - 0; Plants - 42; Viruses - 0; Other Eukaryotes - 0 (source: NCBI BLink).	0	-2.65133	-7.06569	-7.8165	-7.29779	-7.45209
118	HORVU7Hr1G098170	-	HC_G	Protein phosphatase 2C family protein	0	-3.06001	-5.70296	-8.09356	-7.9201	-8.44621
119	HORVU5Hr1G040440	-	HC_G	G-box binding factor 3	0	-2.63026	-5.85956	-7.80855	-7.69787	-8.74472
120	HORVU3Hr1G053060	-	HC_G	Chaperone protein DnaJ	0	-2.85882	-5.81618	-7.25484	-7.93908	-8.90737
121	HORVU3Hr1G112350	-	HC_G	Peroxidase superfamily protein	0	-2.64026	-6.24496	-6.98154	-8.33428	-8.56598
122	HORVU5Hr1G026330	-	LC_u	undescribed protein	0	-2.72473	-5.2426	-7.51539	-8.52641	-8.06843
123	HORVU1Hr1G057880	-	HC_G	Eukaryotic peptide chain release factor subunit 1-2	0	-2.86644	-5.56423	-7.85398	-8.16051	-7.44281
124	HORVU1Hr1G093170	-	HC_U	unknown function	0	-2.68543	-6.28581	-6.51282	-7.67147	-7.90144
125	HORVU2Hr1G105760	-	HC_G	Seed maturation protein	0	-4.15898	-7.6484	-7.41407	-7.6763	-8.0482
126	HORVU5Hr1G053020	-	HC_G	unknown function	0	-4.60597	-7.45167	-7.1792	-7.45021	-7.21556
127	HORVU5Hr1G058330	-	HC_U	unknown function	0	-3.83167	-6.97788	-7.01592	-7.39943	-8.54491
128	HORVU5Hr1G058310	-	HC_U	unknown function	0	-3.83167	-6.97788	-7.01592	-7.39943	-8.54491
129	HORVU3Hr1G004280	-	HC_G	Bowman-Birk type trypsin inhibitor	0	-3.5259	-7.43826	-6.76574	-6.70996	-8.33421
130	HORVU4Hr1G063190	-	HC_G	Early light-induced protein; chloroplastic	0	-3.78114	-7.24881	-7.9604	-5.57785	-8.03073
131	HORVU1Hr1G086580	-	HC_G	BEST Arabidopsis thaliana protein match is: transcription factor-related .	0	-4.18044	-8.51773	-7.28505	-7.44237	-6.17721
132	HORVU2Hr1G021190	-	HC_U	unknown function	0	-5.94392	-5.3868	-5.55447	-8.70239	-7.29087
133	HORVU0Hr1G033670	-	HC_G	NADH-ubiquinone oxidoreductase chain 4	0	-7.04465	-5.55617	-5.60543	-6.49992	-7.48987
134	HORVU3Hr1G056160	-	LC_u	undescribed protein	0	-5.95382	-6.58164	-6.37198	-4.93955	-7.40686
135	HORVU3Hr1G004680	-	HC_G	Photosystem I P700 chlorophyll a apoprotein A1	-2.92779	-5.15645	-5.75121	-6.19319	-6.83518	-4.53476
136	HORVU7Hr1G064950	-	LC_u	undescribed protein	-2.68865	-5.82017	-5.47862	-6.17011	-5.20387	-4.52831
137	HORVU1Hr1G046570	-	LC_U	unknown function	-1.52413	-4.83559	-6.96264	-7.13282	-4.81719	-4.73218
138	HORVU3Hr1G117740	-	HC_G	Chromosome 3B; genomic scaffold; cultivar Chinese Spring	-3.24795	-5.91603	-6.98551	-6.98551	-6.98551	-6.98551
139	HORVU7Hr1G072080	-	x	x	-2.61884	-5.69492	-5.72357	-6.7449	-6.88448	-7.59923
140	HORVU0Hr1G019910	-	LC_u	undescribed protein	-2.42281	-6.18789	-5.82031	-6.42313	-6.65217	-7.20174
141	HORVU3Hr1G004700	-	HC_G	Photosystem I P700 chlorophyll a apoprotein A2	-3.07253	-6.23673	-6.73579	-6.73579	-5.66756	-6.73579
142	HORVU2Hr1G092120	-	LC_u	undescribed protein	-2.40104	-6.05649	-7.33706	-6.11674	-5.42447	-7.33554
143	HORVU7Hr1G058370	-	HC_G	NADH-quinone oxidoreductase subunit N	-2.78751	-6.67964	-6.0669	-5.60496	-6.71177	-6.2462
144	HORVU7Hr1G107130	-	HC_G	Senescence-associated protein	-2.76476	-5.87257	-6.2107	-5.86109	-6.231	-6.24299
145	HORVU6Hr1G062990	-	HC_U	Plant protein of unknown function (DUF828) with plant pleckstrin homology-like region	-2.45509	-6.30726	-6.30726	-6.30726	-6.30726	-5.36647
146	HORVU5Hr1G115740	-	LC_u	undescribed protein	-2.24978	-6.04823	-6.10698	-5.95295	-5.45293	-6.38353
147	HORVU3Hr1G004580	-	HC_u	undescribed protein	-2.40444	-6.03134	-6.35666	-5.5488	-5.37869	-6.33178
148	HORVU6Hr1G085230	-	HC_G	NADH-ubiquinone oxidoreductase chain 4	-1.78394	-5.56897	-5.78399	-5.64492	-5.32927	-6.78527
149	HORVU0Hr1G037670	-	LC_U	Chromosome 3B; genomic scaffold; cultivar Chinese Spring	-2.85067	-4.76708	-7.18967	-6.15313	-6.85631	-7.58947
150	HORVU0Hr1G019890	-	x	x	-1.82419	-5.03769	-6.9842	-6.05968	-6.44407	-7.81911
151	HORVU0Hr1G019930	-	HC_G	NADH-ubiquinone oxidoreductase chain 1	-1.82419	-5.03769	-6.9842	-6.05968	-6.44407	-7.81911
152	HORVU3Hr1G018730	-	HC_u	undescribed protein	-1.88617	-4.03272	-6.44474	-6.38034	-5.27106	-6.88647
153	HORVU6Hr1G064600	-	x	x	-1.77117	-4.87242	-7.01242	-5.53718	-5.33697	-6.42379
154	HORVU4Hr1G044800	-	HC_G	ribosomal protein S19	-1.74546	-4.66309	-6.32533	-5.54542	-6.31885	-6.94407
155	HORVU5Hr1G034700	-	LC_u	undescribed protein	-2.07705	-4.43409	-6.03185	-5.26194	-6.03568	-6.5359
156	HORVU4Hr1G059530	-	HC_G	NADH-quinone oxidoreductase subunit D	-2.00693	-4.41035	-6.32781	-4.84404	-5.7899	-7.15971
157	HORVU3Hr1G078390	-	HC_TE?	F-box family protein	-1.47334	-5.0121	-5.89685	-7.04005	-7.04005	-6.08339
158	HORVU7Hr1G074100	-	HC_G	Cytochrome c oxidase subunit 2	-1.90398	-4.92163	-5.9495	-6.34408	-7.80938	-7.83184
159	HORVU0Hr1G011520	-	HC_G	Ribosomal protein S4; mitochondrial	-1.77027	-4.96224	-5.66595	-6.47051	-6.98098	-7.55683
160	HORVU5Hr1G042680	-	HC_G	NADH-ubiquinone oxidoreductase chain 6	-1.79109	-4.53839	-5.92065	-6.35991	-7.24201	-7.23375
161	HORVU1Hr1G025060	-	HC_G	NADH-ubiquinone oxidoreductase chain 1	-1.83779	-4.49777	-5.5552	-5.9594	-6.66682	-7.79179
162	HORVU7Hr1G069400	-	LC_u	undescribed protein	-1.53497	-3.93537	-5.85662	-7.24058	-7.26192	-7.14533
163	HORVU1Hr1G065100	-	HC_G	Bidirectional sugar transporter N3	-1.75	-3.93486	-5.35787	-6.54919	-7.60102	-7.71743
164	HORVU0Hr1G037060	-	HC_G	NADH-ubiquinone oxidoreductase chain 6	-1.78336	-4.72641	-5.55138	-6.42564	-6.59824	-7.32644
165	HORVU0Hr1G034170	-	x	x	-1.68051	-4.62821	-5.26954	-6.72051	-6.53567	-7.16205
166	HORVU3Hr1G050700	-	HC_G	ATP synthase subunit b	-1.68051	-4.62821	-5.26954	-6.72051	-6.53567	-7.16205
167	HORVU0Hr1G019950	-	HC_G	ATP synthase subunit alpha	-1.35471	-4.60985	-5.71369	-6.43647	-6.5149	-7.15613
168	HORVU0Hr1G034160	-	HC_G	NADH-ubiquinone oxidoreductase chain 5	-1.23587	-4.31907	-5.4256	-6.57344	-6.62264	-7.36999
169	HORVU0Hr1G034150	-	HC_G	Cytochrome b	-1.10974	-4.34045	-5.51903	-6.35266	-6.31112	-7.19811
170	HORVU7Hr1G020070	-	HC_G	ATP synthase subunit a	-1.13604	-4.14185	-5.49907	-6.60874	-6.72623	-6.97217
171	HORVU3Hr1G079600	-	HC_G	ATP synthase subunit a	-1.07634	-3.91569	-5.14376	-6.39076	-6.55406	-7.14739
172	HORVU4Hr1G052650	-	HC_G	Sec-independent protein translocase protein TatC	-1.49578	-4.17811	-5.3018	-6.37157	-6.02728	-7.43508
173	HORVU0Hr1G019940	-	HC_G	Sec-independent protein translocase protein TatC	-1.49578	-4.17811	-5.3018	-6.37157	-6.02728	-7.43508
174	HORVU2Hr1G015590	-	HC_G	ACT domain repeat 3	-1.84653	-4.96401	-5.3072	-6.15946	-6.47274	-5.7187
175	HORVU3Hr1G040850	-	HC_G	NADH-ubiquinone oxidoreductase chain 6	-1.68915	-4.617	-5.69423	-6.65363	-6.41606	-6.24915
176	HORVU7Hr1G044360	-	HC_G	NADH-ubiquinone oxidoreductase chain 6	-1.68915	-4.617	-5.69423	-6.65363	-6.41606	-6.24915
177	HORVU7Hr1G089600	-	HC_G	ATPase subunit 8	-1.5781	-4.76212	-5.3124	-6.14293	-6.24279	-6.45995
178	HORVU3Hr1G004590	-	HC_G	NADH-quinone oxidoreductase subunit N	-1.47551	-4.59683	-5.05133	-6.26412	-6.26984	-6.56299
179	HORVU0Hr1G037120	-	x	x	-1.38006	-4.50882	-5.27182	-5.84327	-6.25857	-6.65245
180	HORVU5Hr1G104650	-	LC_u	undescribed protein	-1.30251	-4.20888	-5.64972	-6.04952	-6.04952	-6.04952
181	HORVU2Hr1G086660	-	HC_G	Ribosomal protein S13; mitochondrial	-1.55144	-3.65722	-4.58739	-5.98545	-6.12826	-7.29328
182	HORVU4Hr1G070820	-	HC_G	NADH-quinone oxidoreductase subunit K	-1.58566	-3.63569	-4.51589	-6.71856	-5.6968	-6.45143
183	HORVU5Hr1G079610	-	HC_G	Disease resistance protein	-1.86631	-3.35958	-3.51571	-6.25709	-5.8168	-6.1928
184	HORVU5Hr1G083990	-	HC_G	Senescence-associated protein	-2.397	-4.40328	-4.63448	-5.02692	-6.69915	-8.17423
185	HORVU2Hr1G075370	-	HC_u	undescribed protein	0	-4.36597	-7.10764	-8.39074	-6.85256	-5.68203
186	HORVU5Hr1G103460	-	HC_G	Dehydrin Rab15	0	-4.10166	-7.27635	-8.29011	-6.4574	-5.2326
187	HORVU4Hr1G070970	-	HC_G	Vicilin-like antimicrobial peptides 2-2	0	-4.06079	-6.79867	-7.36418	-6.61758	-5.73765
188	HORVU6Hr1G084010	-	HC_G	Dehydrin 7	0	-4.26928	-6.63262	-8.48296	-5.3696	-4.805
189	HORVU4Hr1G090090	-	HC_G	Heat stress transcription factor C-2a	0	-4.06163	-6.76013	-7.57301	-5.79083	-5.00553
190	HORVU5Hr1G125470	-	LC_u	undescribed protein	0	-4.27303	-6.86546	-7.65124	-5.73221	-4.40614
191	HORVU7Hr1G079240	-	LC_u	undescribed protein	0	-3.0361	-6.54634	-7.43873	-7.21696	-5.11456
192	HORVU3Hr1G013910	-	HC_G	Asparagine synthetase [glutamine-hydrolyzing]	0	-3.29364	-5.41511	-7.59445	-7.66145	-5.26818
193	HORVU4Hr1G001700	-	HC_G	Calcium-binding EF-hand family protein	0	-3.32025	-5.50372	-7.60763	-6.47798	-5.4414
194	HORVU7Hr1G058120	-	HC_G	Chlorophyll a-b binding protein 1B; chloroplastic	0	-2.47641	-5.2622	-8.14127	-6.43801	-4.34821
195	HORVU6Hr1G080900	-	HC_G	ATP synthase subunit a	0	-4.16357	-6.00432	-8.04987	-6.44573	-7.47498
196	HORVU4Hr1G052660	-	HC_G	NADH-quinone oxidoreductase subunit H	0	-4.58573	-5.0708	-8.17756	-6.72267	-7.4099
197	HORVU4Hr1G050510	-	HC_U	unknown protein; Has 30201 Blast hits to 17322 proteins in 780 species: Archae - 12; Bacteria - 1396; Metazoa - 17338; Fungi - 3422; Plants - 5037; Viruses - 0; Other Eukaryotes - 2996 (source: NCBI BLink).	0	-3.27705	-5.81789	-8.4648	-7.22147	-6.57482
198	HORVU3Hr1G111580	-	HC_U	unknown protein; LOCATED IN: endomembrane system; EXPRESSED IN: stem; inflorescence meristem; root; leaf; EXPRESSED DURING: LP.04 four leaves visible; Has 30201 Blast hits to 17322 proteins in 780 species: Archae - 12; Bacteria - 1396; Metazoa - 17338; Fungi - 3422; Plants - 5037; Viruses - 0; Other Eukaryotes - 2996 (source: NCBI BLink).	0	-3.1945	-6.12638	-7.77931	-7.68444	-6.62721
199	HORVU1Hr1G021710	-	HC_U	unknown protein; LOCATED IN: endomembrane system; EXPRESSED IN: stem; inflorescence meristem; root; leaf; EXPRESSED DURING: LP.04 four leaves visible; Has 30201 Blast hits to 17322 proteins in 780 species: Archae - 12; Bacteria - 1396; Metazoa - 17338; Fungi - 3422; Plants - 5037; Viruses - 0; Other Eukaryotes - 2996 (source: NCBI BLink).	0	-3.28177	-6.39994	-7.5873	-7.38849	-6.53651
200	HORVU3Hr1G014280	-	HC_G	DNA/RNA-binding protein KIN17	0	-2.73996	-5.45275	-6.95541	-7.71415	-7.06657
201	HORVU1Hr1G025570	-	HC_G	Lactoylglutathione lyase / glyoxalase I family protein	0	-3.21116	-5.37437	-7.19126	-7.482	-6.58338
202	HORVU4Hr1G059260	-	HC_G	Heat shock 70 kDa protein 3	0	-3.02774	-5.58845	-7.14857	-7.08516	-7.28972
203	HORVU6Hr1G062070	-	HC_G	Sugar phosphate exchanger 2	0	-3.18797	-5.61875	-6.96399	-6.74484	-7.18141
204	HORVU0Hr1G017760	-	HC_G	Remorin family protein	0	-3.02383	-5.64171	-6.77514	-6.80442	-6.5349
205	HORVU2Hr1G070310	-	HC_G	hydroxysteroid dehydrogenase 1	0	-2.45373	-5.42303	-7.84201	-6.76612	-6.43106
206	HORVU4Hr1G018290	-	LC_u	undescribed protein	0	-4.40554	-7.22021	-6.79124	-7.38042	-6.29342
207	HORVU7Hr1G043900	-	LC_u	undescribed protein	0	-4.69175	-6.25215	-6.90103	-7.18103	-6.5147
208	HORVU7Hr1G093480	-	HC_G	dihydroflavonol 4-reductase-like1	0	-4.1927	-6.36992	-6.71582	-6.71582	-6.71582
209	HORVU1Hr1G079250	-	HC_G	Late embryogenesis abundant protein 76	0	-4.35967	-6.23337	-6.81639	-7.22789	-5.82808
210	HORVU7Hr1G053620	-	LC_u	undescribed protein	0	-5.70518	-4.84521	-6.66158	-6.41833	-6.37721
211	HORVU2Hr1G034000	-	HC_G	ATPase subunit 8	0	-4.8362	-4.96136	-6.16779	-6.49573	-6.47955
212	HORVU4Hr1G023940	-	HC_G	Ribosomal protein S4; mitochondrial	0	-4.30321	-5.81341	-5.98629	-7.24158	-6.81328
213	HORVU7Hr1G067010	-	HC_G	Cytochrome c biogenesis FC	0	-3.95516	-5.45382	-5.60267	-7.44139	-6.80935
214	HORVU2Hr1G122840	-	HC_G	Cytochrome c biogenesis B	0	-4.04911	-4.54488	-6.09643	-6.65952	-6.65952
215	HORVU1Hr1G031490	-	HC_u	undescribed protein	0	-3.6653	-4.80958	-6.42632	-6.77961	-6.17891
216	HORVU7Hr1G045630	-	HC_G	HVA22 homologue E	-1.31873	-3.34883	-5.46523	-6.86322	-6.32673	-5.85859
217	HORVU0Hr1G017380	-	HC_G	Serine-rich protein	-1.65555	-3.70867	-6.28204	-5.9467	-5.2642	-5.46629
218	HORVU3Hr1G059030	-	HC_U	unknown protein; Has 45 Blast hits to 45 proteins in 13 species: Archae - 0; Bacteria - 0; Metazoa - 0; Fungi - 0; Plants - 45; Viruses - 0; Other Eukaryotes - 0 (source: NCBI BLink).	0	-3.62469	-7.35774	-5.99675	-6.48756	-6.79462
219	HORVU7Hr1G012850	-	HC_G	histone H1-3	0	-3.17143	-6.95237	-6.04306	-6.21464	-6.01632
220	HORVU6Hr1G054890	-	HC_G	undescribed protein	0	-3.3317	-6.47304	-5.68165	-5.68168	-6.06286
221	HORVU0Hr1G029570	-	HC_G	Eukaryotic aspartyl protease family protein	0	-3.06118	-6.53133	-5.14428	-6.10508	-7.07391
222	HORVU6Hr1G027750	-	LC_u	undescribed protein	0	-4.67207	-6.09522	-6.53976	-4.82112	-6.06755
223	HORVU2Hr1G053660	-	HC_G	Senescence-associated protein	0	-4.02272	-5.40839	-6.50088	-4.97455	-6.68095
224	HORVU1Hr1G020600	-	HC_G	Xaa-Pro dipeptidase	0	-4.46749	-5.96369	-6.02001	-5.93769	-6.30958
225	HORVU3Hr1G078600	-	LC_TE?	EID1-like F-box protein 3	0	-3.79323	-5.90153	-6.57968	-6.12994	-6.14592
226	HORVU3Hr1G033190	-	HC_U	Chromosome 3B; genomic scaffold; cultivar Chinese Spring	0	-3.50767	-6.16807	-6.16807	-6.16807	-6.16807
227	HORVU7Hr1G113300	-	HC_u	undescribed protein	0	-3.24491	-6.27336	-6.04862	-5.91217	-6.84128
228	HORVU0Hr1G013080	-	HC_G	PHD finger protein	0	-3.66609	-5.53323	-6.15955	-6.07118	-6.44888
229	HORVU4Hr1G014410	-	LC_u	undescribed protein	0	-3.47358	-4.96705	-5.95986	-5.99111	-6.42543
230	HORVU2Hr1G107270	-	HC_G	U-box domain-containing protein 19	0	-3.40943	-5.09792	-6.60817	-5.58726	-6.00256
231	HORVU7Hr1G078670	-	HC_G	Cleavage and polyadenylation specificity factor subunit 5	0	-2.71798	-5.20153	-7.04137	-5.7381	-5.84134
232	HORVU2Hr1G098660	-	HC_G	Calcium-binding EF-hand family protein	0	-3.04517	-5.52509	-6.64493	-5.84253	-5.21974
233	HORVU3Hr1G069590	-	HC_G	Heat stress transcription factor C-1b	0	-3.65985	-6.34757	-7.3362	-6.54915	-4.96724
234	HORVU4Hr1G054110	-	HC_G	Mitochondrial import inner membrane translocase subunit Tim17/Tim22/Tim23 family protein	0	-4.17213	-6.11164	-6.90263	-6.06809	-4.87078
235	HORVU4Hr1G054080	-	HC_G	Mitochondrial import inner membrane translocase subunit Tim17/Tim22/Tim23 family protein	0	-4.17213	-6.11164	-6.90263	-6.06809	-4.87078
236	HORVU4Hr1G018310	-	LC_u	undescribed protein	0	-4.36725	-5.64794	-6.11807	-6.75994	-5.16524
237	HORVU4Hr1G010750	-	HC_G	Dehydrin 6	0	-4.04686	-5.71793	-6.38946	-5.80781	-5.39772
238	HORVU3Hr1G086380	-	HC_G	ENTH/VHS family protein	0	-4.42848	-6.77026	-5.89673	-4.77511	-5.3062
239	HORVU5Hr1G008890	-	HC_U	unknown protein; Has 30201 Blast hits to 17322 proteins in 780 species: Archae - 12; Bacteria - 1396; Metazoa - 17338; Fungi - 3422; Plants - 5037; Viruses - 0; Other Eukaryotes - 2996 (source: NCBI BLink).	0	-4.34492	-6.29743	-6.28104	-5.50257	-4.5653
240	HORVU2Hr1G069710	-	HC_U	unknown protein; BEST Arabidopsis thaliana protein match is: unknown protein .	0	-3.88296	-6.33762	-6.20646	-5.27751	-4.64527
241	HORVU2Hr1G031500	-	HC_G	strictosidine synthase-like 3	0	-3.55681	-5.90508	-5.69709	-5.3128	-4.51543
242	HORVU1Hr1G089730	-	HC_G	Iron-sulfur cluster assembly protein 1	0	-1.92747	-5.2937	-7.99115	-8.43256	-10.0933
243	HORVU6Hr1G044060	-	LC_u	undescribed protein	0	-2.88878	-4.91249	-7.31316	-8.01117	-9.8201
244	HORVU2Hr1G071890	-	HC_G	Desiccation-related protein PCC13-62	0	-3.30488	-4.99926	-6.60771	-7.2824	-9.12612
245	HORVU6Hr1G024920	-	HC_G	HXXXD-type acyl-transferase family protein	0	-1.77736	-4.97085	-6.17201	-7.15839	-9.34261
246	HORVU5Hr1G095180	-	HC_G	Adenine nucleotide alpha hydrolases-like superfamily protein	0	-1.5891	-4.60352	-6.58739	-9.24325	-8.71634
247	HORVU4Hr1G017240	-	HC_U	unknown protein; Has 25 Blast hits to 25 proteins in 9 species: Archae - 0; Bacteria - 0; Metazoa - 0; Fungi - 0; Plants - 25; Viruses - 0; Other Eukaryotes - 0 (source: NCBI BLink).	0	-1.98556	-4.60907	-7.46802	-8.22072	-8.72049
248	HORVU2Hr1G088760	-	HC_G	Caleosin-related family protein	0	-1.73347	-4.43589	-7.38591	-8.60808	-8.25464
249	HORVU6Hr1G093260	-	HC_G	M-1	0	-1.95573	-5.00153	-6.82513	-7.92449	-8.51942
250	HORVU2Hr1G121630	-	HC_U	Chromosome 3B; genomic scaffold; cultivar Chinese Spring	0	-4.13938	-3.38659	-5.37824	-9.12832	-9.12832
251	HORVU7Hr1G046030	-	HC_G	Na+/H+ (sodium hydrogen) exchanger 3	0	-3.49465	-4.3357	-5.47717	-7.91883	-9.49142
252	HORVU2Hr1G001400	-	HC_G	B3 domain-containing protein	-1.10329	-3.00641	-4.64404	-6.55372	-7.56981	-7.61767
253	HORVU2Hr1G113790	-	LC_u	undescribed protein	0	-2.94623	-4.73292	-7.4473	-7.11538	-7.9391
254	HORVU1Hr1G027040	-	LC_u	undescribed protein	0	-2.46347	-3.86952	-6.6984	-7.66206	-7.81318
255	HORVU7Hr1G042790	-	HC_G	ADP;ATP carrier protein 3; mitochondrial	0	-2.50118	-4.6441	-7.15152	-7.63187	-7.08341
256	HORVU3Hr1G016430	-	HC_G	Raffinose synthase family protein	0	-2.32515	-4.89316	-6.91743	-7.07053	-7.03502
257	HORVU4Hr1G063350	-	HC_G	heat shock protein 21	0	-1.60771	-4.62747	-6.25712	-7.60177	-7.25878
258	HORVU6Hr1G086820	-	HC_G	Serine-rich protein	0	-2.04284	-4.11995	-6.78827	-7.37745	-7.00424
259	HORVU3Hr1G005350	-	HC_G	Beta-fructofuranosidase; insoluble isoenzyme 3	0	-1.9577	-4.01443	-6.47313	-7.30303	-6.93187
260	HORVU4Hr1G004820	-	HC_G	H(+)-ATPase 11	0	-1.69091	-4.037	-7.31696	-8.00149	-6.72623
261	HORVU5Hr1G105840	-	HC_G	Aluminium induced protein with YGL and LRDR motifs	0	-1.54461	-3.47278	-5.79621	-7.22717	-8.04774
262	HORVU6Hr1G024200	-	LC_u	undescribed protein	0	-2.08078	-3.52129	-6.56586	-6.69038	-7.16276
263	HORVU4Hr1G057850	-	LC_u	undescribed protein	0	-2.59596	-3.19326	-5.44	-6.98988	-7.26138
264	HORVU5Hr1G001750	-	HC_U	undescribed protein	0	-1.80239	-4.20752	-7.76142	-6.8464	-5.94058
265	HORVU3Hr1G113020	-	HC_G	Nuclear transport factor 2 (NTF2) family protein	0	-2.92739	-5.32922	-6.57998	-6.55607	-8.26184
266	HORVU2Hr1G104120	-	HC_u	undescribed protein	0	-3.47062	-5.30882	-5.83934	-6.31997	-8.26879
267	HORVU6Hr1G068150	-	HC_G	Ubiquinol oxidase	0	-2.75977	-5.02432	-6.22959	-6.62379	-7.64279
268	HORVU2Hr1G113810	-	LC_u	undescribed protein	0	-2.70527	-4.95421	-5.84862	-6.2861	-7.2519
269	HORVU3Hr1G071370	-	HC_G	early nodulin-like protein 1	0	-2.27443	-4.94267	-5.67697	-6.3245	-8.3469
270	HORVU2Hr1G036930	-	HC_G	Cathepsin B-like cysteine proteinase	0	-2.25182	-6.08401	-6.37022	-6.18595	-7.50975
271	HORVU5Hr1G115310	-	HC_G	Mannan endo-1;4-beta-mannosidase 4	0	-1.8758	-5.05391	-6.89831	-6.53806	-7.41495
272	HORVU0Hr1G005250	-	HC_G	Aquaporin-like superfamily protein	0	-2.14526	-6.00959	-5.71888	-6.17001	-6.54035
273	HORVU5Hr1G095160	-	HC_G	Adenine nucleotide alpha hydrolases-like superfamily protein	0	-2.16747	-5.40232	-5.83478	-5.7009	-6.85546
274	HORVU1Hr1G056570	-	HC_G	Late embryogenesis abundant protein 76	0	-2.60302	-5.31431	-5.75351	-5.84784	-6.22069
275	HORVU5Hr1G115100	-	HC_G	GRAM domain-containing protein / ABA-responsive protein-related	0	-1.64559	-4.74091	-5.92521	-5.80241	-6.17114
276	HORVU2Hr1G086530	-	HC_G	NADH-quinone oxidoreductase subunit D	0	-4.53182	-5.15305	-5.65377	-5.56768	-7.7671
277	HORVU2Hr1G086610	-	HC_G	30S ribosomal protein S7	0	-3.93	-4.44405	-5.6339	-5.86319	-7.7619
278	HORVU7Hr1G049130	-	HC_G	WRKY DNA-binding protein 2	0	-3.05085	-4.24643	-4.7428	-5.77989	-7.71414
279	HORVU2Hr1G113850	-	LC_u	undescribed protein	0	-2.8185	-4.25246	-6.30463	-6.89155	-5.90833
280	HORVU4Hr1G072830	-	HC_U	Plant protein of unknown function (DUF639)	0	-2.55803	-4.28134	-6.19919	-6.78705	-6.26323
281	HORVU3Hr1G030340	-	HC_G	Mitochondrial substrate carrier family protein	0	-2.09868	-3.70042	-6.59065	-6.76723	-6.26418
282	HORVU5Hr1G007220	-	HC_G	Transketolase	0	-2.08705	-4.23827	-6.35104	-6.51301	-6.05976
283	HORVU7Hr1G036240	-	LC_u	undescribed protein	0	-2.21185	-4.28358	-6.39549	-6.01074	-6.21845
284	HORVU5Hr1G094490	-	HC_G	Bax inhibitor-1 family protein	0	-2.51719	-4.10324	-6.13072	-6.43305	-5.39607
285	HORVU2Hr1G104580	-	HC_G	At5g37260-like protein	0	-2.1954	-3.54012	-6.22933	-5.88863	-5.44782
286	HORVU0Hr1G013950	-	HC_G	G-box binding factor 3	0	-2.11558	-4.5113	-6.24516	-6.03209	-5.05604
287	HORVU2Hr1G012790	-	HC_G	Transketolase	0	-1.63438	-3.96483	-6.09575	-5.92227	-5.16474
288	HORVU5Hr1G046550	-	HC_G	Non-specific lipid-transfer protein 1	0	-1.8627	-4.01596	-5.51413	-5.86845	-6.92245
289	HORVU3Hr1G056790	-	LC_u	undescribed protein	0	-1.48528	-3.96647	-5.6121	-5.99739	-6.77417
290	HORVU7Hr1G057490	-	LC_u	undescribed protein	0	-1.85324	-3.89246	-4.93488	-6.14145	-6.97027
291	HORVU4Hr1G067430	-	HC_G	Heat shock 70 kDa protein 8	0	-2.03585	-3.35887	-5.80654	-6.61932	-5.94953
292	HORVU4Hr1G051010	-	HC_G	Phosphoglycerate mutase; 2;3-bisphosphoglycerate-independent	0	-1.51741	-3.71996	-5.80718	-6.07778	-6.13132
293	HORVU5Hr1G062990	-	HC_G	alanine aminotransferase 2	0	-1.45051	-3.41385	-5.54657	-6.09345	-6.40845
294	HORVU3Hr1G020500	-	HC_G	17.6 kDa class II heat shock protein	0	-2.39514	-3.56064	-5.65208	-6.14185	-6.58419
295	HORVU6Hr1G076400	-	LC_U	BnaAnng22160D protein	0	-2.41924	-4.07229	-5.37266	-5.58293	-6.22915
296	HORVU4Hr1G051500	-	LC_u	undescribed protein	0	-2.22245	-3.80219	-5.25622	-5.35595	-6.11849
297	HORVU5Hr1G077000	-	LC_u	undescribed protein	0	-2.0241	-3.32228	-5.53985	-5.57109	-5.94459
298	HORVU1Hr1G093180	-	HC_G	RNA polymerase sigma-B factor	0	-1.49741	-4.09203	-5.70781	-4.8899	-6.0149
299	HORVU2Hr1G108290	-	HC_G	Solute carrier family 22 member 15-like	0	-1.71013	-3.84899	-4.80156	-5.16183	-5.79993
300	HORVU2Hr1G040830	-	HC_TE?	F-box family protein	0	-1.3745	-3.50121	-5.35002	-5.03752	-5.38665
301	HORVU3Hr1G052420	-	HC_G	Magnesium transporter CorA-like family protein	0	-1.03376	-2.69003	-6.38385	-6.28318	-6.44101
302	HORVU4Hr1G015170	-	HC_G	17.6 kDa class II heat shock protein	0	-1.88793	-4.31697	-3.99918	-6.64107	-5.91774
303	HORVU4Hr1G085480	-	HC_G	PLANT CADMIUM RESISTANCE 2	0	0	-2.52004	-6.46125	-8.18051	-9.89451
304	HORVU3Hr1G084360	-	HC_G	ABSCISIC ACID-INSENSITIVE 5-like protein 2	0	0	-2.5143	-6.49637	-8.1611	-8.85847
305	HORVU5Hr1G115300	-	HC_U	unknown function	0	0	-3.85458	-5.34109	-7.54976	-9.10417
306	HORVU2Hr1G077710	-	HC_G	22.0 kDa class IV heat shock protein	0	0	-3.5216	-5.71848	-8.102	-8.05351
307	HORVU2Hr1G004720	-	HC_G	UDP-Glycosyltransferase superfamily protein	0	0	-3.65018	-5.87546	-7.17786	-7.76386
308	HORVU2Hr1G104130	-	HC_G	Hblt14.2 protein	0	0	-2.76541	-4.808	-8.28514	-8.69358
309	HORVU5Hr1G103420	-	HC_G	Glutathione S-transferase family protein	1.94105	0	-3.45933	-6.68926	-8.08886	-8.37363
310	HORVU3Hr1G084210	-	HC_G	ferredoxin 3	0	0	-3.89858	-5.80193	-6.59748	-6.8766
311	HORVU5Hr1G079670	-	HC_G	UDP-glycosyltransferase 74 F1	0	0	-4.60639	-5.08414	-6.20076	-7.12876
312	HORVU4Hr1G010150	-	HC_G	Bifunctional uridylyltransferase/uridylyl-removing enzyme	0	0	-3.04632	-5.31026	-5.66929	-6.96969
313	HORVU4Hr1G028510	-	HC_G	beta-xylosidase 2	0	-1.09493	-2.62361	-4.47963	-6.99647	-7.0162
314	HORVU3Hr1G089250	-	HC_G	Ethylene insensitive 3 family protein	0	0	-2.1829	-5.04777	-6.50522	-7.96843
315	HORVU3Hr1G083060	-	LC_u	undescribed protein	1.47867	0	-2.46865	-4.75068	-6.49727	-7.71746
316	HORVU4Hr1G074710	-	HC_G	undescribed protein	0	0	-8.43826	-7.75657	-8.75424	-8.16605
317	HORVU2Hr1G098160	-	HC_G	Oleosin	0	0	-6.96788	-8.68469	-7.31566	-9.03075
318	HORVU5Hr1G045770	-	HC_G	actin depolymerizing factor 4	0	0	-7.5949	-5.84468	-7.14057	-5.30918
319	HORVU3Hr1G114390	-	HC_G	Pentatricopeptide repeat-containing protein	-7.44795	-6.86217	-4.96225	-7.15231	-8.63693	-9.15156
320	HORVU1Hr1G025120	-	HC_G	Cytochrome c oxidase subunit 1	-5.38178	-8.55221	-5.92745	-6.96176	-6.40261	-6.84068
321	HORVU6Hr1G057690	-	HC_G	E3 ubiquitin-protein ligase PRT6	-5.14725	-6.56098	-3.44014	-6.56098	-6.56098	-6.56098
322	HORVU6Hr1G062930	-	HC_G	E3 ubiquitin-protein ligase BRE1-like 1	-4.7648	-5.80959	-7.6047	-5.70835	-7.6047	-7.6047
[truncated: 21,184 more rows]

## Sheet: ST2B
Supplemental Table 2B. List of differentially expressed Arabidopsis genes as represented in Figure 2. Given are log2 of fold changes compared to the 0 h time point. Ord. column indicates order show on heatmap.
[truncated: 19,896 more rows]

[truncated: 21 more sheets: ST3A, ST3B, ST4, ST5A, ST5B, ST6A, ST6B, ST7A, ST7B, ST7C, ST7D, ST8, ST9A , ST9B , ST10, ST11A, ST11B, ST12A, ST12B, ST12C …]
